# Supplementary material for: Prolonged repeated inseminations trigger a local immune response and accelerate aging of the uterovaginal junction in turkey hens
Source: Front Physiol. 2023 Nov 22;14:1275922. doi: 10.3389/fphys.2023.1275922 (PMC10703162; doi:10.3389/fphys.2023.1275922)
Supplement: Supplementary file 1 [file Table2.XLSX]

## Sheet: Mean read counts 
gene_id	gene_name	Gene description	Virgin	Sham_Early lay	Semen_Early lay	Sham_Peak lay	Semen_Peak lay	Sham_Late lay	Semen_Late lay
ENSMGAG00000000001	5S_rRNA	5S ribosomal RNA [Source:RFAM;Acc:RF00001]	0	0	0	0	0	0	0
ENSMGAG00000000004	MIR1743	Gallus gallus microRNA 1743 (MIR1743)	0	0	0	0	0	0	0
ENSMGAG00000000010	ENSMGAG00000000010	snoRNA	20.75	12.5	14.75	13	14	12.25	14.5
ENSMGAG00000000012	ENSMGAG00000000012	snoRNA	4	3.5	6	5	2.75	6	3.5
ENSMGAG00000000013	ENSMGAG00000000013	snoRNA	13	15.25	12.75	8.75	13	6.5	10.75
ENSMGAG00000000015	MIR460B	Gallus gallus microRNA 460b (MIR460B)	0	0	0	0	0	0	0
ENSMGAG00000000016	MIR130A	Gallus gallus microRNA 130a (MIR130A)	0.25	0	0	0	0	0	0
ENSMGAG00000000017	U1	U1 spliceosomal RNA [Source:RFAM;Acc:RF00003]	0	0	0	0	0	0	0
ENSMGAG00000000019	MIR126	Gallus gallus microRNA 126 (MIR126)	5.5	5	3.5	5.75	2.75	4	3.75
ENSMGAG00000000022	ENSMGAG00000000022	snoRNA	7.75	11	10	12.5	10.25	4.5	13.5
ENSMGAG00000000024	SNORD73	Small nucleolar RNA SNORD73 [Source:RFAM;Acc:RF00071]	3	3.25	7.25	8.5	3.75	2.25	2.75
ENSMGAG00000000025	MIR15A	microRNA 15a [Source:HGNC Symbol;Acc:HGNC:31543]	0	0	0.25	0.25	0	0	0
ENSMGAG00000000028	ENSMGAG00000000028	snoRNA	2	0.5	0.25	0.25	0.25	0.75	0.25
ENSMGAG00000000033	MIR499A	Gallus gallus microRNA 499a (MIR499A)	0	0	0	0	0	0	0
ENSMGAG00000000035	ENSMGAG00000000035	snoRNA	3.25	5	4.5	6.75	5.25	2.5	2.5
ENSMGAG00000000036	ENSMGAG00000000036	snoRNA	19.25	11	5.75	11.75	10.75	5	8.25
ENSMGAG00000000038	MIR365B	Gallus gallus microRNA 365b (MIR365B)	4	3.75	2.75	0.75	2.75	2.25	2.75
ENSMGAG00000000042	ENSMGAG00000000042	snoRNA	0.75	0	0	0.75	0	0	0.25
ENSMGAG00000000048	MIR130B	Gallus gallus microRNA 130b (MIR130B)	0.5	0.25	1.5	0	0	0	0
ENSMGAG00000000049	ENSMGAG00000000049	snoRNA	0	0	0.25	0	0.25	0	0.25
ENSMGAG00000000050	MIR24-2	Gallus gallus microRNA 24-2 (MIR24-2)	1.75	1.75	3	1.5	2	2.5	2.25
ENSMGAG00000000052	MIR21	microRNA 21 [Source:HGNC Symbol;Acc:HGNC:31586]	17.5	15.75	12	26.25	21.25	30.25	29.25
ENSMGAG00000000055	MIR211	microRNA 211 [Source:HGNC Symbol;Acc:HGNC:31588]	0	0	0.25	0	0	0	0.5
ENSMGAG00000000056	SNORD14	Small nucleolar RNA SNORD14 [Source:RFAM;Acc:RF00016]	35.25	33.5	42	59	39.5	24.25	38.25
ENSMGAG00000000057	MIR302B	Gallus gallus microRNA 302b (MIR302B)	0	0	0	0	0	0	0
ENSMGAG00000000059	U6	U6 spliceosomal RNA [Source:RFAM;Acc:RF00026]	0	0	0	0	0	0	0
ENSMGAG00000000062	MIR1662	Gallus gallus microRNA 1662 (MIR1662)	0.25	0	0	0	0	0.75	0.5
ENSMGAG00000000063	ENSMGAG00000000063	snoRNA	6	4	6.5	7	6.5	7.25	4.5
ENSMGAG00000000065	U3	Small nucleolar RNA U3 [Source:RFAM;Acc:RF00012]	47	18.75	35.5	19.75	41.75	40	37.5
ENSMGAG00000000066	ENSMGAG00000000066	snoRNA	0	0.25	0	0.75	0	0	0
ENSMGAG00000000069	ENSMGAG00000000069	snoRNA	0	0	0	1.25	0	0	0
ENSMGAG00000000071	ENSMGAG00000000071	snoRNA	4	3.75	2.25	3.5	1.25	1.75	1
ENSMGAG00000000077	ENSMGAG00000000077	snoRNA	8.75	6.25	2.75	6.5	5.5	5	3.75
ENSMGAG00000000080	SNORA71	Small nucleolar RNA SNORA71 [Source:RFAM;Acc:RF00056]	29.5	38.5	42.5	34.5	31.5	24.5	21
ENSMGAG00000000083	MIR1-1	Gallus gallus microRNA 1-1 (MIR1-1)	0	0	0	0	0	0	0
ENSMGAG00000000086	ENSMGAG00000000086	snoRNA	8.5	10.75	9.75	10	13.25	9.5	13
ENSMGAG00000000089	MIR107	Gallus gallus microRNA 107 (MIR107)	1	1.5	2.75	0.75	1.5	1.75	1
ENSMGAG00000000090	MIR18A	microRNA 18a [Source:HGNC Symbol;Acc:HGNC:31548]	0	0	0	0	0	0	0
ENSMGAG00000000091	ENSMGAG00000000091	snoRNA	8.5	13.75	8.25	23.5	8.75	7.25	6.75
ENSMGAG00000000092	MIR19A	microRNA 19a [Source:HGNC Symbol;Acc:HGNC:31574]	0	0	0	0	0	0	0
ENSMGAG00000000094	U1	U1 spliceosomal RNA [Source:RFAM;Acc:RF00003]	0	0	0	0	0	0	0
ENSMGAG00000000096	MIR133A-2	Gallus gallus microRNA 133a-2 (MIR133A2)	0	0	0	0	0	0	0
ENSMGAG00000000097	5S_rRNA	5S ribosomal RNA [Source:RFAM;Acc:RF00001]	2.5	3	1.5	2.25	1.5	0.5	2
ENSMGAG00000000099	MIR429	Gallus gallus microRNA 429 (MIR429)	11	15.5	8.5	8	4.5	4.75	4.5
ENSMGAG00000000100	ENSMGAG00000000100	snoRNA	9.75	13.5	10.5	14.75	14.25	4.75	10
ENSMGAG00000000103	U2	U2 spliceosomal RNA [Source:RFAM;Acc:RF00004]	0	0	0	0	0	0	0
ENSMGAG00000000105	MIR222	microRNA 222 [Source:HGNC Symbol;Acc:HGNC:31602]	0	0	0	0	0	0	0.5
ENSMGAG00000000106	MIRLET7A3	Gallus gallus microRNA let-7a-3 (MIRLET7A3)	0.25	0.75	0	0	0	0	0.5
ENSMGAG00000000107	MIR139B	Gallus gallus microRNA 193b (MIR193B)	0	0.75	0.5	0.25	0.75	0.25	0
ENSMGAG00000000108	ENSMGAG00000000108	snoRNA	3.5	5	2	3	4	1.5	3.75
ENSMGAG00000000115	ENSMGAG00000000115	snoRNA	3.25	4.5	2	1.5	0.75	1.75	3.75
ENSMGAG00000000116	U12	U12 minor spliceosomal RNA [Source:RFAM;Acc:RF00007]	0	0	0	0	0.25	0	0
ENSMGAG00000000118	U1	U1 spliceosomal RNA [Source:RFAM;Acc:RF00003]	0	0.25	0	0	0	0.5	0
ENSMGAG00000000121	ENSMGAG00000000121	snoRNA	32	32.5	28.75	34.5	33.25	30	29.25
ENSMGAG00000000122	ENSMGAG00000000122	snRNA	0	0	0	0	0.5	0	0
ENSMGAG00000000123	SNORD15	Small nucleolar RNA SNORD15 [Source:RFAM;Acc:RF00067]	2	2.75	1	0.75	1.75	1.5	1
ENSMGAG00000000124	MIR138-2	Gallus gallus microRNA 138-2 (MIR138-2)	0.25	1.5	0	0.25	0	0.5	0.5
ENSMGAG00000000125	ENSMGAG00000000125	snoRNA	2.5	1.25	0.75	1.25	0.75	0.75	0.5
ENSMGAG00000000128	SNORD7	small nucleolar RNA, C/D box 7 [Source:HGNC Symbol;Acc:HGNC:32704]	2.25	1.25	1.5	1.5	1	1.5	1.25
ENSMGAG00000000133	MIR190A	Gallus gallus microRNA 190a (MIR190A)	0	0	0	0	0.25	0	0
ENSMGAG00000000135	U1	U1 spliceosomal RNA [Source:RFAM;Acc:RF00003]	0	0	0	0	0	0	0
ENSMGAG00000000136	SNORD15	Small nucleolar RNA SNORD15 [Source:RFAM;Acc:RF00067]	8.75	8.25	10.5	10	8	7.25	3.75
ENSMGAG00000000137	ENSMGAG00000000137	snoRNA	4.75	4.25	4	7.25	3.5	6.75	2.75
ENSMGAG00000000138	U6	U6 spliceosomal RNA [Source:RFAM;Acc:RF00026]	0	0	0	0	0	0	0
ENSMGAG00000000140	ENSMGAG00000000140	snoRNA	5.5	2.25	2.25	5.75	4.75	3.75	6.25
ENSMGAG00000000141	MIR1B	Gallus gallus microRNA 1b (MIR1B)	0.5	1	0.75	0	0	1.25	0.5
ENSMGAG00000000144	SNORD79	Small nucleolar RNA SNORD79 [Source:RFAM;Acc:RF00152]	16.5	12.25	10	17.5	12.75	13.5	11.25
ENSMGAG00000000147	MIR199A-2	Gallus gallus microRNA 199a-2 (MIR199A2)	2.5	1.25	2.5	1.5	1.25	2	1.25
ENSMGAG00000000149	MIR101-2	Gallus gallus microRNA 101-2 (MIR101-2)	1.5	3.5	1.5	3.25	1.75	0.5	0.5
ENSMGAG00000000150	MIR456	Gallus gallus microRNA 456 (MIR456)	0	0	0	0	0	0	0
ENSMGAG00000000153	MIR135B	microRNA 135b [Source:HGNC Symbol;Acc:HGNC:31760]	0	0	0	0	0	0	0
ENSMGAG00000000156	MIR218-1	Gallus gallus microRNA 218-1 (MIR218-1)	0	0	0.75	0	0	0	0.25
ENSMGAG00000000157	SNORA63	Small nucleolar RNA SNORA63 [Source:RFAM;Acc:RF00092]	11.25	12	15.25	15.75	8.25	7.75	10
ENSMGAG00000000158	SNORD63	Small nucleolar RNA SNORD63 [Source:RFAM;Acc:RF00154]	2.25	0.75	3.5	2.75	1.5	0.5	1.25
ENSMGAG00000000164	SNORD93	small nucleolar RNA, C/D box 93 [Source:HGNC Symbol;Acc:HGNC:32755]	19.25	23.75	11	16.25	11.5	11.75	17.5
ENSMGAG00000000167	SNORA52	small nucleolar RNA, H/ACA box 52 [Source:HGNC Symbol;Acc:HGNC:32645]	6	7.5	9.5	9.5	11.25	8	12
ENSMGAG00000000169	MIR16-2	microRNA 16-2 [Source:HGNC Symbol;Acc:HGNC:31546]	1.25	2.5	1.75	1.25	0.25	0.25	0.5
ENSMGAG00000000171	MIR194-1	Gallus gallus microRNA 194-1 (MIR194-1)	0	0	0	0	0	0	0
ENSMGAG00000000174	MIR153-2	microRNA 153-2 [Source:HGNC Symbol;Acc:HGNC:31540]	0	0	0.25	0.75	0	1	0.75
ENSMGAG00000000177	ENSMGAG00000000177	snoRNA	0.25	0	0	0	1.25	0	0
ENSMGAG00000000178	SCARNA10	small Cajal body-specific RNA 10 [Source:HGNC Symbol;Acc:HGNC:32567]	1	0	1.75	1	1.5	0.75	0.25
ENSMGAG00000000179	MIR19B-2	Gallus gallus microRNA mir-19b-2 (MIR19B-2)	0	0	0	0	0	0.25	0
ENSMGAG00000000181	SNORD16	Small nucleolar RNA SNORD16 [Source:RFAM;Acc:RF00138]	0.5	1.75	0.25	1.5	1.25	1.5	1.75
ENSMGAG00000000183	MIR155	microRNA 155 [Source:HGNC Symbol;Acc:HGNC:31542]	0	0.75	0	0	0	0	0
ENSMGAG00000000184	ENSMGAG00000000184	snoRNA	21.25	21.25	17	27.5	18.5	14.5	24.5
ENSMGAG00000000185	ENSMGAG00000000185	snoRNA	3.5	4	2.75	2.75	2.75	2.5	2.25
ENSMGAG00000000186	SNORA75	Small nucleolar RNA SNORA75 [Source:RFAM;Acc:RF00072]	4.25	5.5	5.75	4.25	1	2.5	3
ENSMGAG00000000188	U6	U6 spliceosomal RNA [Source:RFAM;Acc:RF00026]	0	0	0	0	0	0	0
ENSMGAG00000000189	MIR15B	microRNA 15b [Source:HGNC Symbol;Acc:HGNC:31544]	0.5	0.5	0.75	0	0	0	0
ENSMGAG00000000190	MIR1677	Gallus gallus microRNA 1677 (MIR1677)	0	0.25	0.25	0	0	0	0
ENSMGAG00000000191	MIR1559	Gallus gallus microRNA 1559 (MIR1559)	0	0.5	0.25	0	0	0	0
ENSMGAG00000000195	MIR147-1	Gallus gallus microRNA 147-1 (MIR147-1)	247.25	204.5	218.75	67.75	62	146.75	101.75
ENSMGAG00000000198	ENSMGAG00000000198	snoRNA	5.75	2	1.25	6.25	2.5	1.25	1
ENSMGAG00000000202	MIR128-1	Gallus gallus microRNA 128-1 (MIR128-1)	0	0.25	0.25	0.5	0	0	0
ENSMGAG00000000203	U1	U1 spliceosomal RNA [Source:RFAM;Acc:RF00003]	0	0	0	0	0	0	0
ENSMGAG00000000209	ENSMGAG00000000209	snoRNA	2	2.75	3.75	6	1	3	2.75
ENSMGAG00000000210	ENSMGAG00000000210	snoRNA	21.5	19.75	20.75	26	24.25	15.5	26.25
ENSMGAG00000000212	U5	U5 spliceosomal RNA [Source:RFAM;Acc:RF00020]	0.5	0.5	0.25	2.25	0.5	0.25	0.5
ENSMGAG00000000213	MIR103A2	microRNA 103a-2 [Source:HGNC Symbol;Acc:HGNC:31491]	0.75	0	0.25	1.25	0	1	0.25
ENSMGAG00000000214	ENSMGAG00000000214	snoRNA	1	1.25	0	0.25	1.25	0.5	0.75
ENSMGAG00000000216	ENSMGAG00000000216	snoRNA	1.25	3.25	2	1	0.75	0.25	1.75
ENSMGAG00000000218	MIR301A	Gallus gallus microRNA 301a (MIR301A)	0.75	0.5	0.25	0.25	0	0.75	0
ENSMGAG00000000219	MIRLET7B	Gallus gallus microRNA let-7b (MIRLET7B)	5	10	7.25	3.5	5.25	7	4.5
ENSMGAG00000000220	U1	U1 spliceosomal RNA [Source:RFAM;Acc:RF00003]	0	0.25	0	0	0	0	0
ENSMGAG00000000223	ENSMGAG00000000223	snoRNA	2.25	0.75	2.5	2.5	1.5	1.75	1.25
ENSMGAG00000000224	ENSMGAG00000000224	snoRNA	7.75	3.25	4.5	4	3.25	1	3
ENSMGAG00000000225	MIR1759	Gallus gallus microRNA 1759 (MIR1759)	0	0	0	0.25	0	0	0.75
ENSMGAG00000000226	MIR30B	Gallus gallus microRNA 30b (MIR30B)	26	27	25.5	19.75	14.25	27.5	23.5
ENSMGAG00000000233	MIR489	Gallus gallus microRNA 489 (MIR489)	0	0	0	0	0	0	0
ENSMGAG00000000234	SNORD97	small nucleolar RNA, C/D box 97 [Source:HGNC Symbol;Acc:HGNC:32760]	62.5	59.25	62	63.25	57	36.5	50
ENSMGAG00000000235	MIRLET7F2	Gallus gallus microRNA let-7f-2 (MIRLET7F2)	3.75	3.75	1.75	3.75	2.75	3.25	1
ENSMGAG00000000237	MIR367	Gallus gallus microRNA 367 (MIR367)	0	0	0	0	0	0	0
ENSMGAG00000000238	MIR490	microRNA 490 [Source:HGNC Symbol;Acc:HGNC:32075]	0	0	0	0	0	0	0
ENSMGAG00000000241	ENSMGAG00000000241	snoRNA	0	0	0	0	0	0	0
ENSMGAG00000000243	SNORD16	Small nucleolar RNA SNORD16 [Source:RFAM;Acc:RF00138]	7	7.5	7.25	12.5	5.75	6	11
ENSMGAG00000000244	ENSMGAG00000000244	snoRNA	0	0	0	0	0	0	0
ENSMGAG00000000245	MIR454	Gallus gallus microRNA 454 (MIR454)	0.5	2	0.5	0.25	0	0.25	0
ENSMGAG00000000246	SNORD111B	small nucleolar RNA, C/D box 111B [Source:HGNC Symbol;Acc:HGNC:33579]	0	0	0.5	0.5	0	0	0
ENSMGAG00000000248	ENSMGAG00000000248	snoRNA	2	2	4.25	2.5	2.5	1.75	4
ENSMGAG00000000249	ENSMGAG00000000249	snoRNA	61	75.25	58.5	104	121.5	36	66.25
ENSMGAG00000000250	MIR217	Gallus gallus microRNA 217 (MIR217)	0	0	0	0	0	0	0
ENSMGAG00000000252	ENSMGAG00000000252	snRNA	0	0	0.25	0	0.25	1	0
ENSMGAG00000000255	U6	U6 spliceosomal RNA [Source:RFAM;Acc:RF00026]	0	0	0	0	0	0	0
ENSMGAG00000000256	U1	U1 spliceosomal RNA [Source:RFAM;Acc:RF00003]	0	0	0.25	0	0	0	0
ENSMGAG00000000258	MIR1460	Gallus gallus microRNA 1460 (MIR1460)	0	0	0	0	0	0	0
ENSMGAG00000000259	MIR183	Gallus gallus microRNA 183 (MIR183)	0	0	0	0	0	0	0
ENSMGAG00000000261	MIR125B2	Gallus gallus microRNA 125b-2 (MIR125B2)	13.25	16.5	10.75	11.25	12.75	12.75	17.5
ENSMGAG00000000264	MIR10A	Gallus gallus microRNA 10a (MIR10A)	0.5	0.75	1.25	0.75	2.25	1.25	0.5
ENSMGAG00000000266	ENSMGAG00000000266	snoRNA	13.25	12.75	8.5	14.75	7.25	6.25	10.75
ENSMGAG00000000268	MIR29A	microRNA 29a [Source:HGNC Symbol;Acc:HGNC:31616]	0	0	0.5	0.25	0	2.5	0
ENSMGAG00000000270	SNORD21	Small nucleolar RNA SNORD21 [Source:RFAM;Acc:RF00068]	8.25	9.75	4.25	9.75	5.25	4.75	3.25
ENSMGAG00000000272	ENSMGAG00000000272	snRNA	0.5	0	0	0	0.25	0.25	0
ENSMGAG00000000273	ENSMGAG00000000273	snoRNA	1.25	0.25	1.5	0.75	0.75	1.25	0.75
ENSMGAG00000000275	SNORD36	Small nucleolar RNA SNORD36 [Source:RFAM;Acc:RF00049]	5	11.25	6.25	5.75	9	6.25	7
ENSMGAG00000000276	ENSMGAG00000000276	snoRNA	24.75	17	14.25	27	19.75	16.25	24.5
ENSMGAG00000000278	ENSMGAG00000000278	snoRNA	33.25	20.75	30.75	23	20.5	12	24.25
ENSMGAG00000000285	SNORD15	Small nucleolar RNA SNORD15 [Source:RFAM;Acc:RF00067]	0.25	0.5	0.25	0.25	0.75	0	0
ENSMGAG00000000287	ENSMGAG00000000287	snoRNA	8.25	10.75	9	10.25	3.5	2.75	3.5
ENSMGAG00000000288	MIRLET7C	microRNA let-7c [Source:HGNC Symbol;Acc:HGNC:31480]	0	0	0	0	0	0	0
ENSMGAG00000000289	MIR1803	Gallus gallus microRNA 1803 (MIR1803)	0	0	0	0	0	0	0
ENSMGAG00000000292	ENSMGAG00000000292	snoRNA	2.5	2.5	2.75	2.5	2.5	0.5	5.75
ENSMGAG00000000297	ENSMGAG00000000297	snoRNA	7.75	8.5	7.25	7.5	9.25	4.25	6.75
ENSMGAG00000000301	MIRLET7I	Gallus gallus microRNA let-7i (MIRLET7I)	1.5	0.75	1	0.75	0.25	0.5	0.75
ENSMGAG00000000302	MIR125B-1	Gallus gallus microRNA mir-125b-1 (MIR125B-1)	19.75	28	17.5	17.25	11.75	10	13.75
ENSMGAG00000000303	MIR23B	Gallus gallus microRNA 23b (MIR23B)	1.25	2	1.75	0.5	1.5	0.5	1.25
ENSMGAG00000000306	ENSMGAG00000000306	snoRNA	23.5	18.75	18.75	27.75	19.5	18.75	21
ENSMGAG00000000307	MIR9-2	Gallus gallus microRNA 9-2 (MIR9-2)	0.5	1	0	0	0	0	0
ENSMGAG00000000308	ENSMGAG00000000308	snoRNA	17.75	15	13.75	23.75	11.25	12.25	8.75
ENSMGAG00000000310	MIR146C-1	Gallus gallus microRNA 146c-1 (MIR146C-1)	3	3.75	3.5	4.5	0.25	1.75	3.75
ENSMGAG00000000311	MIR140	Gallus gallus microRNA 140 (MIR140)	0	0	0	0	0	0	0
ENSMGAG00000000313	SNORD127	small nucleolar RNA, C/D box 127 [Source:HGNC Symbol;Acc:HGNC:33555]	24.25	26.25	23.25	22.5	22	16.25	21.5
ENSMGAG00000000315	SNORA21	small nucleolar RNA, H/ACA box 21 [Source:HGNC Symbol;Acc:HGNC:32611]	7.75	9	10.5	11	9.5	3.75	8
ENSMGAG00000000317	ENSMGAG00000000317	snoRNA	14.25	15	16.5	18.5	12.75	8.5	10.25
ENSMGAG00000000319	SNORA23	small nucleolar RNA, H/ACA box 23 [Source:HGNC Symbol;Acc:HGNC:32613]	0.25	0	0	0.25	0.25	0	0
ENSMGAG00000000320	ENSMGAG00000000320	snoRNA	0.5	0	0	0.25	0.75	1.25	0
ENSMGAG00000000321	ENSMGAG00000000321	snoRNA	2	2.5	1.25	1.5	1.75	0	2.75
ENSMGAG00000000323	ENSMGAG00000000323	snoRNA	3.25	7.5	5.5	3.5	3.5	1.75	2.5
ENSMGAG00000000324	ENSMGAG00000000324	snoRNA	0	0	0	0	0	0	0
ENSMGAG00000000325	ENSMGAG00000000325	snoRNA	192.5	165.75	152	221.75	137.5	189.25	133.5
ENSMGAG00000000326	ENSMGAG00000000326	snoRNA	26	28.25	27.75	32.25	24.25	28.5	24.75
ENSMGAG00000000328	SNORD18	Small nucleolar RNA SNORD18 [Source:RFAM;Acc:RF00093]	8.25	5.25	3	8.75	6	5.75	6
ENSMGAG00000000329	U6	U6 spliceosomal RNA [Source:RFAM;Acc:RF00026]	0	0	0	0	0	0	0
ENSMGAG00000000331	ENSMGAG00000000331	snoRNA	0.5	0.25	0.25	0.25	0	0	0
ENSMGAG00000000332	MIR133C	Gallus gallus microRNA 133c (MIR133C)	7.25	3.75	3.5	8.5	2.25	7.25	3.25
ENSMGAG00000000333	MIRLET7G	Gallus gallus microRNA let-7g (MIRLET7G)	0	0	0	0	0	0	0
ENSMGAG00000000337	MIR3529	Gallus gallus microRNA 3529 (MIR3529)	5.5	9.25	11	4.5	7	7	4.75
ENSMGAG00000000338	U6	U6 spliceosomal RNA [Source:RFAM;Acc:RF00026]	0	0	0	0	0	0	0
ENSMGAG00000000339	SNORD24	Small nucleolar RNA SNORD24 [Source:RFAM;Acc:RF00069]	0.25	1.75	0.25	0.25	1	0.75	0.25
ENSMGAG00000000346	MIR30C2	Gallus gallus microRNA 30c-2 (MIR30C2)	5.25	4.75	4.5	7.5	2.75	4.75	6
ENSMGAG00000000347	U6	U6 spliceosomal RNA [Source:RFAM;Acc:RF00026]	0	0	0	0	0	0	0
ENSMGAG00000000349	ENSMGAG00000000349	snoRNA	2	2	1.25	3.25	0.5	1.25	1
ENSMGAG00000000350	MIR1630	Gallus gallus microRNA 1630 (MIR1630)	0	0.25	0	0	0	0.75	0
ENSMGAG00000000351	MIR205	Gallus gallus microRNA 205 (MIR205)	0	0	0	0	0	0.25	0
ENSMGAG00000000352	MIR19B1	microRNA 19b-1 [Source:HGNC Symbol;Acc:HGNC:31575]	0	0	0	0	0	0	0
ENSMGAG00000000353	SNORD82	Small nucleolar RNA SNORD82 [Source:RFAM;Acc:RF00158]	1.5	0.5	0.75	1	0.5	0.25	1.5
ENSMGAG00000000354	MIR100	microRNA 100 [Source:HGNC Symbol;Acc:HGNC:31487]	9.75	8	6.25	9.5	10.5	12.75	8
ENSMGAG00000000356	MIR130C	Gallus gallus microRNA 130c (MIR130C)	0	0	0	0.5	0	0	0
ENSMGAG00000000358	MIR99A	Gallus gallus microRNA 99a (MIR99A)	0	0	0	0	0	0	0
ENSMGAG00000000360	MIR96	Gallus gallus microRNA mir-96 (MIR96)	0	0	0	0	0	0	0
ENSMGAG00000000362	MIR17	Gallus gallus microRNA 17 (MIR17)	0	0	0	0	0	0	0
ENSMGAG00000000363	U6	U6 spliceosomal RNA [Source:RFAM;Acc:RF00026]	0	0	0	0	0	0	0
ENSMGAG00000000365	MIR122-2	Gallus gallus microRNA 122-2 (MIR122-2)	0	0	0	0	0	0	0
ENSMGAG00000000368	MIR26A-2	Gallus gallus microRNA mir-26a-2 (MIR26A-2)	6.25	2.5	3.5	6.75	6.25	3.75	3.75
ENSMGAG00000000370	MIR16-1	Gallus gallus microRNA 16-1 (MIR16-1)	0	0	0	0.25	0	0	0.5
ENSMGAG00000000371	MIR199B1	Gallus gallus microRNA 199b-1 (MIR199B1)	3	3.5	4.5	1.5	1.75	1.25	1.25
ENSMGAG00000000373	MIR301B	Gallus gallus microRNA 301b (MIR301B)	0	0	0	0	0	0	0.25
ENSMGAG00000000374	MIR202	Gallus gallus microRNA 202 (MIR202)	0	0	0	0	0	0	0
ENSMGAG00000000382	ENSMGAG00000000382	snoRNA	1.75	0.5	1.25	1.5	2.5	0.75	3
ENSMGAG00000000383	MIR135A2	Gallus gallus microRNA 135a-2 (MIR135A2)	6	4.25	6.5	3.25	4.5	6.25	4
ENSMGAG00000000385	MIR143	microRNA 143 [Source:HGNC Symbol;Acc:HGNC:31530]	41.5	75.75	79	43.75	50.5	67.5	59
ENSMGAG00000000388	MIR455	microRNA 455 [Source:HGNC Symbol;Acc:HGNC:32344]	0	0	0	0	0	0	0
ENSMGAG00000000390	ENSMGAG00000000390	snoRNA	1	1	0.25	0	0	0.25	0.5
ENSMGAG00000000391	SNORD58	Small nucleolar RNA SNORD58 [Source:RFAM;Acc:RF00151]	6.5	3	1.5	1.25	1.5	3	2.25
ENSMGAG00000000392	ENSMGAG00000000392	snoRNA	21	18	23	26.75	23.5	21.25	23.25
ENSMGAG00000000393	ENSMGAG00000000393	snoRNA	0	0	0	0	0	0	0
ENSMGAG00000000401	SNORD98	small nucleolar RNA, C/D box 98 [Source:HGNC Symbol;Acc:HGNC:32761]	1	0.25	0.75	1	1	0.25	0.5
ENSMGAG00000000403	U2	U2 spliceosomal RNA [Source:RFAM;Acc:RF00004]	0	0	0	0	0	0	0
ENSMGAG00000000404	Y_RNA	Y RNA [Source:RFAM;Acc:RF00019]	1	1	1	0.5	0.25	0.25	0
ENSMGAG00000000406	MIR218-2	Gallus gallus microRNA 218-2 (MIR218-2)	0	0.25	0.25	0.25	0	0.25	0
ENSMGAG00000000407	U6	U6 spliceosomal RNA [Source:RFAM;Acc:RF00026]	0	0	0	0	0	0	0
ENSMGAG00000000408	MIR214	microRNA 214 [Source:HGNC Symbol;Acc:HGNC:31591]	0.5	0.75	1	0.25	0.5	1	0.25
ENSMGAG00000000410	MIRLET7A2	Gallus gallus microRNA let-7a-2 (MIRLET7A2)	0	0	0	0	0.25	0	0
ENSMGAG00000000413	MIR375	Gallus gallus microRNA 375 (MIR375)	0	0.5	0	0	0	0	0
ENSMGAG00000000414	MIR142	Gallus gallus microRNA 142 (MIR142)	8.75	7.25	5.5	3.25	2.25	2.5	2.75
ENSMGAG00000000415	U6	U6 spliceosomal RNA [Source:RFAM;Acc:RF00026]	0	0	0.5	0	0.25	1	0
ENSMGAG00000000416	U6	U6 spliceosomal RNA [Source:RFAM;Acc:RF00026]	0	0	0	0	0	0	0
ENSMGAG00000000418	MIR1769	Gallus gallus microRNA 1769 (MIR1769)	0	0	0	0	0	0	0
ENSMGAG00000000419	ENSMGAG00000000419	snoRNA	2	0.25	0.25	0.75	0	0	0.5
ENSMGAG00000000422	MIR20A	Gallus gallus microRNA 20a (MIR20A)	0	0	0	0	0	0	0
ENSMGAG00000000428	ENSMGAG00000000428	snoRNA	7.5	10	12.5	9.75	11	5	8
ENSMGAG00000000430	ENSMGAG00000000430	snoRNA	6.25	3.25	5.5	9.5	4	3	2.5
ENSMGAG00000000433	MIR223	Gallus gallus microRNA 223 (MIR223)	2.25	0.75	1.25	0.5	1	1	0.75
ENSMGAG00000000435	ENSMGAG00000000435	snoRNA	9.25	7.5	5	6.25	7.75	4.5	6.75
ENSMGAG00000000436	SNORD102	small nucleolar RNA, C/D box 102 [Source:HGNC Symbol;Acc:HGNC:10099]	19.75	19.25	19.25	25	18.75	15.75	12.5
ENSMGAG00000000437	MIR302C	microRNA 302c [Source:HGNC Symbol;Acc:HGNC:31764]	0	0	0	0	0	0	0
ENSMGAG00000000439	MIR216B	Gallus gallus microRNA 216b (MIR216B)	0	0	0	0	0	0	0
ENSMGAG00000000441	U1	U1 spliceosomal RNA [Source:RFAM;Acc:RF00003]	0	0	0	0	0	0	0
ENSMGAG00000000442	ENSMGAG00000000442	snoRNA	1	3.25	3.75	1.25	1	1.25	2
ENSMGAG00000000445	ENSMGAG00000000445	snoRNA	19.25	19	27.5	25.25	16.75	18	28.25
ENSMGAG00000000448	SNORD125	small nucleolar RNA, C/D box 125 [Source:HGNC Symbol;Acc:HGNC:33564]	13	13.25	8.25	14.25	7.5	4.5	7.5
ENSMGAG00000000449	ENSMGAG00000000449	snoRNA	3.75	4.25	5.75	5	6.5	5.25	5
ENSMGAG00000000454	MIR363	Gallus gallus microRNA mir-363 (MIR363)	4.5	1.25	2.75	1.25	1.25	3.75	1
ENSMGAG00000000455	ENSMGAG00000000455	snoRNA	7.25	7.75	10	9.25	7.75	4	6
ENSMGAG00000000461	SNORD36	Small nucleolar RNA SNORD36 [Source:RFAM;Acc:RF00049]	2	3.25	1.75	3.25	1.25	2.75	2.75
ENSMGAG00000000463	5S_rRNA	5S ribosomal RNA [Source:RFAM;Acc:RF00001]	0	0	0	0	0	0	0
ENSMGAG00000000466	SNORA72	Small nucleolar RNA SNORA72 [Source:RFAM;Acc:RF00139]	3	1.25	1.25	1	2.5	1.75	2.25
ENSMGAG00000000469	MIR1805	Gallus gallus microRNA 1805 (MIR1805)	0	0	0	0	0	0	0
ENSMGAG00000000475	MIR187	microRNA 187 [Source:HGNC Symbol;Acc:HGNC:31558]	0	0	0	0	0	0	0
ENSMGAG00000000477	MIR1306	Gallus gallus microRNA 1306 (MIR1306)	0	0	0	0	0	0	0
ENSMGAG00000000479	MIR215	Gallus gallus microRNA 215 (MIR215)	0	0	0	0	0	0	0
ENSMGAG00000000480	U6	U6 spliceosomal RNA [Source:RFAM;Acc:RF00026]	0	0	0	0	0	0	0
ENSMGAG00000000481	U1	U1 spliceosomal RNA [Source:RFAM;Acc:RF00003]	0	0	0	0	0	0	0
ENSMGAG00000000486	SNORA84	small nucleolar RNA, H/ACA box 84 [Source:HGNC Symbol;Acc:HGNC:33615]	1.25	0.25	0	0.25	0	0.25	0
ENSMGAG00000000487	SNORD24	Small nucleolar RNA SNORD24 [Source:RFAM;Acc:RF00069]	9.25	8.75	9.75	13.25	7.5	6.75	5.75
ENSMGAG00000000488	ENSMGAG00000000488	snoRNA	0.25	0.25	0.75	1.25	0	0.25	0
ENSMGAG00000000489	ENSMGAG00000000489	snoRNA	1.5	2.5	1	0.5	0.25	1.5	1.25
ENSMGAG00000000491	ENSMGAG00000000491	snoRNA	34.75	28.75	20.75	33.5	28.5	21.75	27.5
ENSMGAG00000000492	MIR34A	Gallus gallus microRNA 34a (MIR34A)	80.25	87.75	72.5	40.25	53.25	64.25	64
ENSMGAG00000000493	ENSMGAG00000000493	snoRNA	4.75	6.75	3.5	6.5	4	3	2.25
ENSMGAG00000000495	MIR1813-2	Gallus gallus microRNA 1813-2 (MIR1813-2)	0	0	0	0	0	0	0
ENSMGAG00000000496	MIR103A1	Gallus gallus microRNA 103a-1 (MIR103A1)	0.25	0.25	0	0	0	0	0
ENSMGAG00000000497	U2	U2 spliceosomal RNA [Source:RFAM;Acc:RF00004]	0	0	0	0	0	0	0
ENSMGAG00000000498	U1	U1 spliceosomal RNA [Source:RFAM;Acc:RF00003]	0	0	0	0	0	0	0
ENSMGAG00000000499	MIR141	Gallus gallus microRNA 141 (MIR141)	4.5	4.25	2	2.5	0.5	5.75	3.5
ENSMGAG00000000501	ENSMGAG00000000501	snRNA	0	0	0	0	0	0	0
ENSMGAG00000000503	ENSMGAG00000000503	snoRNA	25	23.75	23.75	29	19	14.75	17
ENSMGAG00000000505	ENSMGAG00000000505	snoRNA	41.25	41.5	49.5	49.5	40	21.5	34
ENSMGAG00000000506	MIR338	Gallus gallus microRNA mir-338 (MIR338)	0	0	0	0	0	0	0
ENSMGAG00000000509	MIR26A1	microRNA 26a-1 [Source:HGNC Symbol;Acc:HGNC:31610]	0.25	0	0	0.25	0	0	0.5
ENSMGAG00000000511	ENSMGAG00000000511	snoRNA	7.75	10.75	9.25	8.5	4	6.25	7.75
ENSMGAG00000000512	ENSMGAG00000000512	snoRNA	14.75	12.75	12.5	18.5	13.5	6	13.5
ENSMGAG00000000514	MIR181A1	Gallus gallus microRNA 181a-1 (MIR181A1)	1.25	0.75	1.5	0.5	1	1.5	1
ENSMGAG00000000517	MIR144	Gallus gallus microRNA 144 (MIR144)	0.25	0	1.25	0.5	0.25	0.25	0.75
ENSMGAG00000000518	MIR9-1	Gallus gallus microRNA 9-1 (MIR9-1)	0	0	0	0	0	0	0
ENSMGAG00000000521	MIR92A1	Gallus gallus microRNA 92a-1 (MIR92A1)	1.25	0.5	1	0.25	1.25	0	0.75
ENSMGAG00000000525	MIRLET7F1	Gallus gallus microRNA let-7f-1 (MIRLET7F1)	1.5	3.5	2.25	2.5	1.5	3.5	3.25
ENSMGAG00000000526	SCARNA7	small Cajal body-specific RNA 7 [Source:HGNC Symbol;Acc:HGNC:32563]	18	27.5	24	43	37.75	34.25	47
ENSMGAG00000000527	MIR29C	microRNA 29c [Source:HGNC Symbol;Acc:HGNC:31621]	63	69	72.5	34.25	44.5	74.75	69
ENSMGAG00000000529	ENSMGAG00000000529	snoRNA	15	14.75	13.5	16.75	13.25	17.25	13.25
ENSMGAG00000000530	MIR184	Gallus gallus microRNA 184 (MIR184)	0	0	0	0	0	0	0
ENSMGAG00000000533	MIR196A1	microRNA 196a-1 [Source:HGNC Symbol;Acc:HGNC:31567]	0	0	0	0	0	0	0.25
ENSMGAG00000000535	Y_RNA	Y RNA [Source:RFAM;Acc:RF00019]	0	0	0	0	0	0	0
ENSMGAG00000000536	MIR33A	microRNA 33a [Source:HGNC Symbol;Acc:HGNC:31634]	0	0	0.25	0.25	0	0	0
ENSMGAG00000000542	MIR221	Gallus gallus microRNA 221 (MIR221)	0.25	1	0	0	0.25	0	0.25
ENSMGAG00000000543	SNORA73	Small nucleolar RNA SNORA73 family [Source:RFAM;Acc:RF00045]	18.25	22	23	15.75	16.75	13.5	9.75
ENSMGAG00000000544	U6	U6 spliceosomal RNA [Source:RFAM;Acc:RF00026]	0	0	0	0	0	0	0
ENSMGAG00000000547	MIR29B2	microRNA 29b-2 [Source:HGNC Symbol;Acc:HGNC:31620]	19.5	19.5	21.75	15.75	26.75	23.25	18.5
ENSMGAG00000000552	U2	U2 spliceosomal RNA [Source:RFAM;Acc:RF00004]	0	0	0	0	0	0	0
ENSMGAG00000000553	MIR365B	microRNA 365b [Source:HGNC Symbol;Acc:HGNC:33693]	2.5	7	5.75	1	2	1.25	0.75
ENSMGAG00000000554	ENSMGAG00000000554	snoRNA	11	15	10	10.75	11.5	9.5	8.5
ENSMGAG00000000555	SNORA62	Small nucleolar RNA SNORA62/SNORA6 family [Source:RFAM;Acc:RF00091]	19.5	21	13	12	11.5	10	8.75
ENSMGAG00000000557	MIR30A	Gallus gallus microRNA 30a (MIR30A)	0	0	0	0	0	0	0
ENSMGAG00000000559	MIR32	Gallus gallus microRNA 32 (MIR32)	20	29.25	24	23.75	34	43.25	23.5
ENSMGAG00000000562	U6	U6 spliceosomal RNA [Source:RFAM;Acc:RF00026]	0	0	0	0	0	0	0
ENSMGAG00000000564	SNORD18	Small nucleolar RNA SNORD18 [Source:RFAM;Acc:RF00093]	0.75	0.25	0	1.75	0.75	3	2.25
ENSMGAG00000000565	U1	U1 spliceosomal RNA [Source:RFAM;Acc:RF00003]	0	0	0	0	0	0	0
ENSMGAG00000000566	MIR9-1	microRNA 9-1 [Source:HGNC Symbol;Acc:HGNC:31641]	0	0	0	0	0	0	0
ENSMGAG00000000568	MIR30C1	microRNA 30c-1 [Source:HGNC Symbol;Acc:HGNC:31626]	0	1.25	0.25	0.25	0	0.25	0
ENSMGAG00000000573	MIR1-2	Gallus gallus microRNA 1-2 (MIR1-2)	0.25	0	0.25	0	0.75	0.25	0
ENSMGAG00000000574	ENSMGAG00000000574	snoRNA	41.25	25.5	39	50.75	36	41.25	30.25
ENSMGAG00000000575	SNORD18	Small nucleolar RNA SNORD18 [Source:RFAM;Acc:RF00093]	0	0.75	0	2.25	0.25	0.25	0.25
ENSMGAG00000000583	U1	U1 spliceosomal RNA [Source:RFAM;Acc:RF00003]	0	0	0	0	0	0	0
ENSMGAG00000000585	Y_RNA	Y RNA [Source:RFAM;Acc:RF00019]	0	0	0	0	0	0	0
ENSMGAG00000000586	SNORA74	Small nucleolar RNA SNORA74 [Source:RFAM;Acc:RF00090]	0	0.25	0.25	0.25	1.25	1.5	0.25
ENSMGAG00000000587	ENSMGAG00000000587	snoRNA	4.25	4.5	4	7.25	5.25	3.5	6.5
ENSMGAG00000000592	MIR181B1	Gallus gallus microRNA 181b-1 (MIR181B1)	3.5	1.75	1.25	2	4.5	0.75	3.75
ENSMGAG00000000600	MIR122B-1	Gallus gallus microRNA mir-122b-1 (MIR122B-1)	0	0	0	0	0	0	0
ENSMGAG00000000601	ENSMGAG00000000601	snoRNA	2.75	4.75	2	2.75	2.75	2.5	2.5
ENSMGAG00000000602	MIR181A2	Gallus gallus microRNA 181a-2 (MIR181A2)	1	1.25	0.5	0	0	1.25	0.25
ENSMGAG00000000603	ENSMGAG00000000603	snoRNA	0	1	0.75	0.75	0	0	0.25
ENSMGAG00000000604	ENSMGAG00000000604	snoRNA	35.5	38.75	42	34.75	28.75	23.25	29.25
ENSMGAG00000000607	MIR146A	Gallus gallus microRNA 146a (MIR146A)	1	1.75	0.5	0.5	1.25	1.75	0.5
ENSMGAG00000000608	MIR182	Gallus gallus microRNA mir-182 (MIR182)	0.25	0	0	0	0	0	0
ENSMGAG00000000610	MIR1807	Gallus gallus microRNA 1807 (MIR1807)	0	0	0	0	0	0	0
ENSMGAG00000000612	ENSMGAG00000000612	snoRNA	6	4.75	8.25	12	6.25	5	3.5
ENSMGAG00000000613	MIR133A1	Gallus gallus microRNA 133a-1 (MIR133A1)	0.75	1.75	2.25	2.25	1.25	2.25	2.5
ENSMGAG00000000616	U4	U4 spliceosomal RNA [Source:RFAM;Acc:RF00015]	1.75	1.75	1.75	0.75	0.5	0	1.25
ENSMGAG00000000617	ENSMGAG00000000617	Tubulin beta chain	31.25	32.25	32.75	33.75	44.5	35.25	25.5
ENSMGAG00000000618	MIR7-1	microRNA 7-1 [Source:HGNC Symbol;Acc:HGNC:31638]	4	2.5	2.75	3.25	0.5	2	1.25
ENSMGAG00000000620	SNORA62	Small nucleolar RNA SNORA62/SNORA6 family [Source:RFAM;Acc:RF00091]	5.5	7.5	8	6.25	3.5	3.75	3.25
ENSMGAG00000000625	ENSMGAG00000000625	snoRNA	14	8.5	8	8.25	7.25	5.5	8.25
ENSMGAG00000000629	LAO	interleukin 4 induced 1	13.75	15	17	12.5	21	71.75	59.5
ENSMGAG00000000631	HEP21	Hep21	7.75	5.5	5.75	4.75	3.25	0.25	2.5
ENSMGAG00000000633	RACK1	receptor for activated C kinase 1	12039.2	10400.2	10842	9538.75	10113	8673	7890.25
ENSMGAG00000000634	C3	complement C3	129.25	174.5	143.25	65.25	86.75	122	99.75
ENSMGAG00000000635	LOC100540918	tripartite motif-containing protein 7-like	0	2	1	2	0.25	2	0
ENSMGAG00000000636	LOC100540766	E3 ubiquitin-protein ligase TRIM39-like	40.75	42.25	36.25	19.25	19.25	27.75	37.75
ENSMGAG00000000637	TRIM41	Tripartite motif protein 41	803.25	829.5	763.25	835.25	791.5	723.75	690.75
ENSMGAG00000000638	ZNF692	Zinc finger protein 692	48	43.5	39.25	41.75	41	40.5	43
ENSMGAG00000000643	LOC100538406	killer cell lectin-like receptor subfamily B member 1B allele A	0	0	0	0	0.25	0	0
ENSMGAG00000000645	AAK1	AP2 associated kinase 1	494.25	613.75	495	634.5	689.25	403	554.75
ENSMGAG00000000646	ANP32E	acidic nuclear phosphoprotein 32 family member E [Source:HGNC Symbol;Acc:HGNC:16673]	3635.75	3483.5	3242.5	3987.25	3808.75	4234.75	3838.25
ENSMGAG00000000647	PLEKHO1	pleckstrin homology domain containing O1	321.75	399.25	415	270.5	325	163.5	226.5
ENSMGAG00000000648	VPS45	vacuolar protein sorting 45 homolog [Source:HGNC Symbol;Acc:HGNC:14579]	1103.25	991.5	969.5	1186.5	1004	1029	831.5
ENSMGAG00000000649	NFU1	NFU1 iron-sulfur cluster scaffold	883.75	864.25	852	877.75	769	924.75	747.75
ENSMGAG00000000650	GFPT1	glutamine--fructose-6-phosphate transaminase 1 [Source:HGNC Symbol;Acc:HGNC:4241]	8263.75	9569.25	8425.75	10527.2	10914	8865.25	9270.5
ENSMGAG00000000651	ENSMGAG00000000651	VIT domain-containing protein	11	20.25	7.5	12	9.25	12.25	7.75
ENSMGAG00000000653	SF3B4	splicing factor 3b subunit 4	1572.25	1474.25	1370.25	1166.5	1368.75	1029.75	1133.25
ENSMGAG00000000654	ANTXR1	ANTXR cell adhesion molecule 1 [Source:HGNC Symbol;Acc:HGNC:21014]	78	78.5	78	25.75	46	26	51.25
ENSMGAG00000000655	UBQLN4	ubiquilin 4 [Source:HGNC Symbol;Acc:HGNC:1237]	3944.25	3827.75	3649.75	2647.5	3094.75	2719	3264.25
ENSMGAG00000000656	DAD1	defender against cell death 1	2006.25	1863.25	1898.5	2034	2261.25	2045.75	1707.75
ENSMGAG00000000660	GFAP	glial fibrillary acidic protein [Source:HGNC Symbol;Acc:HGNC:4235]	31.25	30.5	16.5	9.25	9.75	4.75	13
ENSMGAG00000000661	LOC104914220	gastrokine-1-like	0	0	0	0	0	0.25	0
ENSMGAG00000000662	GKN2	gastrokine 2 [Source:HGNC Symbol;Acc:HGNC:24588]	0	0	0	0.25	0	0	0
ENSMGAG00000000663	OTUD7B	OTU deubiquitinase 7B	629.25	621	579.25	387.5	577.75	295.5	515.25
ENSMGAG00000000665	ARHGAP25	Rho GTPase activating protein 25	295.75	296	303.75	128.5	174.25	189.75	164.5
ENSMGAG00000000667	MEF2D	myocyte enhancer factor 2D	394.5	441.25	420.25	381.5	574.75	241.75	500.75
ENSMGAG00000000669	CDS2	CDP-diacylglycerol synthase 2 [Source:HGNC Symbol;Acc:HGNC:1801]	563.25	639.5	610.75	803.75	743.75	755.75	746.25
ENSMGAG00000000670	LOC100550565	scale keratin	0	0	0	0	0	0	0.5
ENSMGAG00000000674	TEAD3	TEA domain transcription factor 3	433.25	527	514.25	402	526.5	289.75	382.25
ENSMGAG00000000676	CIART	circadian associated repressor of transcription	40.75	22.5	27.5	11.25	13.75	7	13
ENSMGAG00000000677	PKNOX2	PBX/knotted 1 homeobox 2 [Source:HGNC Symbol;Acc:HGNC:16714]	80.5	81.5	86.5	75.5	47	29	42.75
ENSMGAG00000000678	LOC100538808	Fc receptor-like protein 4	690	745.5	665.25	340.5	469.75	423	487.25
ENSMGAG00000000679	CRYBG2	crystallin beta-gamma domain containing 2 [Source:HGNC Symbol;Acc:HGNC:17295]	443	399.75	333.25	206.25	336.5	145.25	230.25
ENSMGAG00000000680	GOSR2	golgi SNAP receptor complex member 2	1126.25	1207.25	1135	1421.5	1201	1124.75	998
ENSMGAG00000000682	TULP1	tubby like protein 1	1.25	23.5	6.25	146.75	18.5	141.75	47
ENSMGAG00000000683	APH1A	Aph-1 homolog A, gamma-secretase subunit	842.75	801.25	739.75	789.75	776.25	622.25	656.75
ENSMGAG00000000684	PCNA	proliferating cell nuclear antigen	1275	966	1109	896.25	852	943	744.5
ENSMGAG00000000685	LOC100548520	gametocyte-specific factor 1-like	90	116.75	135.25	118	174.75	168	124.25
ENSMGAG00000000686	UBXN11	UBX domain protein 11 [Source:HGNC Symbol;Acc:HGNC:30600]	1532.5	1442.25	1258.75	570.25	709.25	782.25	803.5
ENSMGAG00000000687	CCDC103	coiled-coil domain containing 103 [Source:HGNC Symbol;Acc:HGNC:32700]	386	350	298.75	226.5	262.75	363	275
ENSMGAG00000000689	TIMM44	translocase of inner mitochondrial membrane 44	530.5	567	557	599	599.25	601.75	547.25
ENSMGAG00000000690	KIF18B	kinesin family member 18B [Source:HGNC Symbol;Acc:HGNC:27102]	282.75	267.25	251.25	103.5	95	86.75	108.25
ENSMGAG00000000691	FKBP5	FKBP prolyl isomerase 5	719.75	2865.25	1817.25	9887	1984.5	8692.75	3718.75
ENSMGAG00000000692	CEP85	centrosomal protein 85 [Source:HGNC Symbol;Acc:HGNC:25309]	625.25	607	557.25	421.25	439.75	469.5	429.75
ENSMGAG00000000693	TMEM230	transmembrane protein 230	980.5	955.5	944.75	962.25	1112.25	1175	994
ENSMGAG00000000694	CA14	carbonic anhydrase 14	6.25	7.75	4	2.75	1	2	2
ENSMGAG00000000695	CNKSR1	connector enhancer of kinase suppressor of Ras 1 [Source:HGNC Symbol;Acc:HGNC:19700]	912.25	1002.25	882.75	1020.75	1022	874	901.5
ENSMGAG00000000696	FEZ1	fasciculation and elongation protein zeta 1 [Source:HGNC Symbol;Acc:HGNC:3659]	297	230.25	277	97.5	142.5	95	113.25
ENSMGAG00000000698	SLC23A2	solute carrier family 23 member 2	406.75	413.5	368.25	396.75	454.5	371.5	419
ENSMGAG00000000699	DCAKD	dephospho-CoA kinase domain containing [Source:HGNC Symbol;Acc:HGNC:26238]	33.5	37.5	32.75	34.25	42.75	23.25	39.25
ENSMGAG00000000700	HNRNPM	heterogeneous nuclear ribonucleoprotein M	4019.75	3449.25	3497.5	3612.75	3558.25	3572.25	3054.5
ENSMGAG00000000701	NMT1	N-myristoyltransferase 1 [Source:HGNC Symbol;Acc:HGNC:7857]	1239	1269.5	1259.25	1137.5	1257.25	1103.5	1036.75
ENSMGAG00000000702	MATN1	matrilin 1	5.25	9.75	7.75	10.5	8.25	8.75	9.25
ENSMGAG00000000703	CLPS	colipase [Source:HGNC Symbol;Acc:HGNC:2085]	1.5	2	1.25	2	1	0	1.5
ENSMGAG00000000705	MRPS21	mitochondrial ribosomal protein S21	725.75	643.5	632	613.25	640.75	407.25	456.25
ENSMGAG00000000706	SIK2	salt inducible kinase 2	363.5	421	369.75	382.25	537.25	240	522.75
ENSMGAG00000000707	PRPF3	pre-mRNA processing factor 3 [Source:HGNC Symbol;Acc:HGNC:17348]	1019.75	935.5	918.75	975	904.5	1014	852.5
ENSMGAG00000000708	IGSF21	immunoglobin superfamily member 21 [Source:HGNC Symbol;Acc:HGNC:28246]	23.75	21.5	16.5	8.75	10.5	9.25	15
ENSMGAG00000000709	LHFPL5	LHFPL tetraspan subfamily member 5	48.25	79.75	74.25	61.5	37.25	69.5	42
ENSMGAG00000000710	LAPTM5	lysosomal protein transmembrane 5	832	1008.75	881.75	1001.25	1041	1035	1804.25
ENSMGAG00000000711	STT3A	STT3 oligosaccharyltransferase complex catalytic subunit A	3435.75	3403.5	3523.5	3425	3875.5	2793.5	3134.75
ENSMGAG00000000712	PLCD3	phospholipase C delta 3 [Source:HGNC Symbol;Acc:HGNC:9061]	557	695.75	660.75	350.5	463.25	369.75	537.5
ENSMGAG00000000713	RASSF2	Ras association domain family member 2	374.75	354.5	370.75	281.25	251.5	302.75	260.5
ENSMGAG00000000715	SRPK1	SRSF protein kinase 1	809	875	740.75	1030.5	856.75	767.25	806.25
ENSMGAG00000000716	ARHGEF10L	Rho guanine nucleotide exchange factor 10 like [Source:HGNC Symbol;Acc:HGNC:25540]	1494.5	1387.75	1410	883.5	1546.5	756.25	1304
ENSMGAG00000000717	SDC3	syndecan 3 [Source:NCBI gene (formerly Entrezgene);Acc:100303706]	133.75	153.25	125.25	97.75	216.5	65.5	168.75
ENSMGAG00000000718	TARS2	threonyl-tRNA synthetase 2, mitochondrial (putative)	765.5	789.25	717.5	559	712	484	582.5
ENSMGAG00000000719	EI24	EI24 autophagy associated transmembrane protein [Source:HGNC Symbol;Acc:HGNC:13276]	1376.25	1432.25	1408	1359	1409.25	1179.5	1144.75
ENSMGAG00000000721	TMPRSS9	transmembrane serine protease 9	281.25	274.5	348.5	598.25	331.75	344.75	584
ENSMGAG00000000723	ENSMGAG00000000723	pseudogene	542	517.75	494	478.75	452.5	338.75	354
ENSMGAG00000000724	LOC100539940	pumilio homolog 1	474.25	569.5	480.25	497.75	550.5	326.5	506
ENSMGAG00000000726	RCC2	regulator of chromosome condensation 2 [Source:HGNC Symbol;Acc:HGNC:30297]	4004	3554.25	3473.75	2111.5	2517	1869.5	2333.5
ENSMGAG00000000727	PROM2	prominin 2	32.75	24	19.75	9.5	5.75	5	5.5
ENSMGAG00000000729	LOC100550977	ceramide synthase 4-like	23	24.75	24.75	23	22.25	17.5	23.75
ENSMGAG00000000730	ENSMGAG00000000730	Protein kinase domain-containing protein	41.5	35.5	38	8.5	11.75	6.5	7
ENSMGAG00000000731	RPRD2	regulation of nuclear pre-mRNA domain containing 2 [Source:HGNC Symbol;Acc:HGNC:29039]	1358.25	1318.5	1239.25	1188.75	1099	1007.25	1068.75
ENSMGAG00000000732	SRPRA	SRP receptor subunit alpha	3165	3510.25	3246.75	6436.75	5109.75	2700.5	3309.5
ENSMGAG00000000733	SLC26A8	solute carrier family 26 member 8 [Source:HGNC Symbol;Acc:HGNC:14468]	252.75	321	233.25	171.5	150.5	134.75	166.5
ENSMGAG00000000734	CLK2	CDC like kinase 2	658.25	694	584	659.75	607.75	581.75	576
ENSMGAG00000000736	MCL1	MCL1 apoptosis regulator, BCL2 family member [Source:HGNC Symbol;Acc:HGNC:6943]	718.75	841	734.5	790.25	629	655.5	660.25
ENSMGAG00000000737	PADI1	protein-arginine deiminase type-1	1	1.25	0.75	1.75	1.75	0.25	1.25
ENSMGAG00000000738	ENSA	endosulfine alpha [Source:HGNC Symbol;Acc:HGNC:3360]	1207	1271.25	1212.5	1197.75	1337.25	1292.5	1114.25
ENSMGAG00000000739	ENSMGAG00000000739	POU domain protein	11.25	5.5	3.25	39.5	51	16.5	29.25
ENSMGAG00000000740	WNT3	Wnt family member 3 [Source:HGNC Symbol;Acc:HGNC:12782]	0	0	0	0	0	0	0
ENSMGAG00000000741	GOLPH3L	golgi phosphoprotein 3 like [Source:HGNC Symbol;Acc:HGNC:24882]	2366.25	2307.5	2025	1522.5	1991	1608	1570.75
ENSMGAG00000000742	NPDC1	Neural proliferation, differentiation and control 1	2741.5	2814.25	2548.75	3362.75	4083.75	2343	3238.5
ENSMGAG00000000743	ANKMY1	Ankyrin repeat and MYND domain containing 1	46.5	26	42.5	19.5	15	33	33.25
ENSMGAG00000000745	FAM118B	family with sequence similarity 118 member B	1027	918	848.5	665.25	682.25	662.75	610.25
ENSMGAG00000000746	HORMAD1	HORMA domain containing 1 [Source:HGNC Symbol;Acc:HGNC:25245]	135.5	123.25	125.5	111.5	94.5	149	127.5
ENSMGAG00000000747	NSF	N-ethylmaleimide sensitive factor, vesicle fusing ATPase [Source:HGNC Symbol;Acc:HGNC:8016]	1127.25	1164.75	1126	1418.25	1330.75	1266.5	1094.5
ENSMGAG00000000748	TIRAP	TIR domain containing adaptor protein [Source:HGNC Symbol;Acc:HGNC:17192]	900.75	885.5	885.5	912.25	877.5	632.75	649.25
ENSMGAG00000000749	LOC100538959	dihydropyrimidinase-related protein 2	1024.25	874	901	476.5	697.75	447	597.5
ENSMGAG00000000752	INTS3	Integrator complex subunit 3	869.5	1020	865.5	992.25	952.5	804.5	997
ENSMGAG00000000753	ZC4H2	zinc finger C4H2-type containing	87.25	76	71.25	82.25	68	46.75	59.75
ENSMGAG00000000754	SPPL2B	signal peptide peptidase like 2B	508	506.75	493	429.25	370.25	268	353.25
ENSMGAG00000000755	DCPS	decapping enzyme, scavenger [Source:HGNC Symbol;Acc:HGNC:29812]	269.5	234.5	252.75	125	157	181.5	168
ENSMGAG00000000757	MYH2	myosin heavy chain 2 [Source:HGNC Symbol;Acc:HGNC:7572]	2.25	0.25	2.25	0.25	0	0.25	0
ENSMGAG00000000758	ENSMGAG00000000758	EF-hand calcium binding domain 12	113.75	135.25	107	68.75	67.75	88.75	94.75
ENSMGAG00000000759	zc3h12b	zinc finger CCCH-type containing 12B	430.5	428.5	355.5	353.75	314.75	276.25	358
ENSMGAG00000000760	LOC100549369	ribosomal biogenesis protein LAS1L-like	1629	1441.25	1475	1593.5	1413.25	1479	1227.25
ENSMGAG00000000761	LOC100544929	extracellular fatty acid-binding protein	16544	7817.25	13879	14236.5	15441.2	17020.5	19249
ENSMGAG00000000762	SLC37A2	solute carrier family 37 member 2 [Source:HGNC Symbol;Acc:HGNC:20644]	45.25	38.5	36.5	28.75	15.75	17.75	17.75
ENSMGAG00000000763	LOC100539633	excitatory amino acid transporter 4-like	5.5	5.25	1.5	11	8.75	11	5
ENSMGAG00000000764	KHDC4	KH domain containing 4, pre-mRNA splicing factor [Source:HGNC Symbol;Acc:HGNC:29145]	1423.75	1473.75	1329	1746	1461.5	1354.5	1395
ENSMGAG00000000765	SNRNP40	small nuclear ribonucleoprotein U5 subunit 40 [Source:HGNC Symbol;Acc:HGNC:30857]	589.5	481.5	505.25	386.5	401.25	424.5	352.75
ENSMGAG00000000767	LOC104913648	lipocalin-15-like	0.75	0	1.25	1.75	1	1.5	1
ENSMGAG00000000768	PPP2R2A	protein phosphatase 2 regulatory subunit Balpha	1080.25	1113.5	1119.25	1251	1275.5	1219.5	1148.75
ENSMGAG00000000769	LOC100546611	protocadherin-10-like	0.25	0.25	0.25	1	1	1	0.5
ENSMGAG00000000770	LOC100545080	lipocalin-like	348.25	958.5	692	2064.5	2442.5	1850.5	1841.25
ENSMGAG00000000771	MSN	moesin	2457.75	2839.5	3022.25	2333	2339.75	2511.25	2593.5
ENSMGAG00000000772	PADI2	peptidyl arginine deiminase 2 [Source:HGNC Symbol;Acc:HGNC:18341]	0	0	0.5	0	0.25	0.75	0
ENSMGAG00000000773	LOC100545344	myosin-7-like	5.75	8	7.25	17.5	8.25	8.5	11.5
ENSMGAG00000000775	SOGA1	suppressor of glucose, autophagy associated 1	909.75	1153.25	984.5	689.75	877.25	426	804
ENSMGAG00000000777	ZCCHC17	zinc finger CCHC-type containing 17	100.25	101.25	96.25	112.25	106.5	114.75	96
ENSMGAG00000000778	IMP4	IMP U3 small nucleolar ribonucleoprotein 4	1644	1517.5	1518.25	1107.5	1317	816	935.25
ENSMGAG00000000779	ENSMGAG00000000779	Uncharacterized protein	579.5	475.5	526.25	741.5	282.25	231.25	237.5
ENSMGAG00000000780	RIT1	Ras like without CAAX 1 [Source:HGNC Symbol;Acc:HGNC:10023]	216.5	234.75	205.75	246.5	203	198.5	212.25
ENSMGAG00000000782	SLC25A1	solute carrier family 25 member 1	2276.75	2562.75	2403.25	2366.25	2566	2359.5	2163.5
ENSMGAG00000000783	HEPACAM	hepatic and glial cell adhesion molecule [Source:HGNC Symbol;Acc:HGNC:26361]	14	18.25	12.5	9.5	9.5	10	14.5
ENSMGAG00000000784	ENSMGAG00000000784	Fibrinogen C-terminal domain-containing protein	0.5	0	0.25	0	0.5	0	0
ENSMGAG00000000785	SFMBT1	Scm like with four mbt domains 1 [Source:HGNC Symbol;Acc:HGNC:20255]	129.25	139.5	116	159.25	144.5	123	137
ENSMGAG00000000786	ENSMGAG00000000786	Uncharacterized protein	144.25	164.5	136.5	109.75	108.5	71.25	107
ENSMGAG00000000787	OSGIN1	oxidative stress induced growth inhibitor 1 [Source:HGNC Symbol;Acc:HGNC:30093]	647.5	881	740.5	1139.5	522	819.75	619.5
ENSMGAG00000000789	ACSS2	acyl-CoA synthetase short-chain family member 2	800.75	611.75	649.75	336.25	414.5	255.75	316.75
ENSMGAG00000000790	MAPK14	Mitogen-activated protein kinase (EC 2.7.11.24)	589.75	539.25	550.25	600.75	641.5	575.5	575.25
ENSMGAG00000000791	EBF2	early B-cell factor 2	15	10.5	13	5.25	11.5	4.5	9.25
ENSMGAG00000000792	SYT11	synaptotagmin 11 [Source:HGNC Symbol;Acc:HGNC:19239]	509.5	568	543	314.25	371	365.25	314
ENSMGAG00000000793	ENSMGAG00000000793	pseudogene	1.5	1.75	0.5	0.75	0.75	1	2.5
ENSMGAG00000000794	FABP3	fatty acid-binding protein, heart	817	536.75	597.25	81.75	159.5	159.5	94.75
ENSMGAG00000000795	MEIOC	meiosis specific with coiled-coil domain [Source:HGNC Symbol;Acc:HGNC:26670]	5.25	3.25	5.75	1.5	1.75	2.5	4.25
ENSMGAG00000000797	mapk13	mitogen-activated protein kinase 13	520.75	467.5	487.25	361.5	506.25	353	472.5
ENSMGAG00000000798	CLTCL1	clathrin heavy chain 1	1153.25	1191.25	1147.25	1203	924.25	1086.5	823.75
ENSMGAG00000000799	SERINC2	serine incorporator 2 [Source:HGNC Symbol;Acc:HGNC:23231]	563.75	653.25	557	672.75	1467	657.25	1321
ENSMGAG00000000800	LOC100549678	adrenodoxin-like	31.5	50.25	41	38.25	39.75	40.75	32.5
ENSMGAG00000000801	SLC38A8	solute carrier family 38 member 8	23.75	18.25	27.75	19.5	7.25	13.5	7.25
ENSMGAG00000000803	GON4L	gon-4 like	1126.5	1201.75	1069.25	1179.75	1061.5	1069	1141.25
ENSMGAG00000000805	MBTPS1	membrane bound transcription factor peptidase, site 1 [Source:HGNC Symbol;Acc:HGNC:15456]	3226.5	3266.25	3081.25	4106	3352.25	4124	3311
ENSMGAG00000000806	LOC100549832	rho GTPase-activating protein 20-like	623.25	865.5	797.5	644.75	828.25	648.25	872
ENSMGAG00000000807	PDXDC1	pyridoxal dependent decarboxylase domain containing 1	1056.25	1101.5	1013.25	1193	1084	812.5	934.75
ENSMGAG00000000808	LMNB2	lamin B2	716.5	549.5	577.5	445.25	359.5	285.25	287.5
ENSMGAG00000000809	ENSMGAG00000000809	Ig-like domain-containing protein	163.25	167.5	153.25	97.5	114.5	98.25	97.25
ENSMGAG00000000810	MSANTD2	Myb/SANT DNA binding domain containing 2 [Source:HGNC Symbol;Acc:HGNC:26266]	383.25	380.5	349.5	357.25	304.5	286.5	341
ENSMGAG00000000811	RPL36	ribosomal protein L36	3215	2647.5	2942.5	2631.5	2810.5	2442.5	2008.75
ENSMGAG00000000813	GPATCH3	G-patch domain containing 3 [Source:HGNC Symbol;Acc:HGNC:25720]	140.75	135.5	133.25	144.75	142.5	149.75	106.5
ENSMGAG00000000814	LOC100550291	heat shock factor protein 3	3177.5	3152.25	2739	2477	2871.75	2903	2850.5
ENSMGAG00000000815	LONP1	lon peptidase 1, mitochondrial	1116	1058.25	1043	1059.75	1097.75	995.25	938.5
ENSMGAG00000000816	ENSMGAG00000000816	1-acyl-sn-glycerol-3-phosphate acyltransferase (EC 2.3.1.51)	440.25	538.5	398.75	148	208.25	210.25	286.75
ENSMGAG00000000818	ESAM	endothelial cell adhesion molecule [Source:HGNC Symbol;Acc:HGNC:17474]	320	322.25	329	242.25	278	193.5	231
ENSMGAG00000000819	C22H20orf24	chromosome 22 open reading frame, human C20orf24	1416.75	1464.5	1424.5	1786	2038	1850.5	1400.75
ENSMGAG00000000821	CDCA2	cell division cycle associated 2	88.75	56.5	62.25	12.25	13	16.25	15.5
ENSMGAG00000000822	HEPH	hephaestin	615.25	740	592	912	1052.5	955.25	1198.5
ENSMGAG00000000823	NRGN	neurogranin [Source:HGNC Symbol;Acc:HGNC:8000]	11	13	11.75	1.25	1	2.25	1.75
ENSMGAG00000000824	LOC100543691	dual specificity testis-specific protein kinase 1-like	1.5	3	2.5	2	0.5	1.25	2.5
ENSMGAG00000000825	KDF1	keratinocyte differentiation factor 1 [Source:HGNC Symbol;Acc:HGNC:26624]	590.25	606.5	513.25	593.75	620.75	501.75	532.5
ENSMGAG00000000826	PANX3	pannexin 3 [Source:HGNC Symbol;Acc:HGNC:20573]	187.75	218.25	154.25	192.75	180.75	134	171.75
ENSMGAG00000000827	L3MBTL1	L3MBTL histone methyl-lysine binding protein 1	239.25	320.75	242.75	785	333.5	505	410.25
ENSMGAG00000000828	SPCS1	signal peptidase complex subunit 1 [Source:HGNC Symbol;Acc:HGNC:23401]	1195.75	1104.75	1094.75	1116.25	1245.75	1010.5	936
ENSMGAG00000000829	BRPF3	bromodomain and PHD finger containing 3 [Source:HGNC Symbol;Acc:HGNC:14256]	738.25	866.5	829.5	895.5	867.75	847	788
ENSMGAG00000000830	NTAN1	N-terminal asparagine amidase	336.75	357.5	320.75	408	336.75	380.5	326.5
ENSMGAG00000000831	KCTD9	potassium channel tetramerization domain containing 9	655	678.5	619.25	739.75	649.25	551	568.75
ENSMGAG00000000832	ENSMGAG00000000832	Uncharacterized protein	1415.5	1568.5	1430	1313.25	1623.25	1288.5	1273
ENSMGAG00000000833	C8G	complement C8 gamma chain [Source:HGNC Symbol;Acc:HGNC:1354]	743.25	653.5	628.25	431.5	508.75	388	499
ENSMGAG00000000834	GLT8D1	glycosyltransferase 8 domain containing 1 [Source:HGNC Symbol;Acc:HGNC:24870]	1920.75	1811.25	1652.75	1925	1899	1796	1532.75
ENSMGAG00000000835	ENSMGAG00000000835	Uncharacterized protein	16.5	27.25	26.75	15.5	20.25	47.25	48.25
ENSMGAG00000000836	NUDC	nuclear distribution C, dynein complex regulator	3864.75	2979	3155.25	2383	2638.5	3006.25	2303
ENSMGAG00000000837	MARCHF2	membrane associated ring-CH-type finger 2 [Source:HGNC Symbol;Acc:HGNC:28038]	847.25	945.25	948.25	645	839.25	713.5	710.5
ENSMGAG00000000838	RRN3	RRN3 homolog, RNA polymerase I transcription factor	406.75	429.5	385.5	503.5	407	403.75	338
ENSMGAG00000000839	SNAP29	synaptosome associated protein 29	149	175	145	211.25	155.75	157.75	151
ENSMGAG00000000840	RPUSD4	RNA pseudouridine synthase D4	112	122	103.25	100.5	102.5	71	86
ENSMGAG00000000841	LOC100539535	alpha-2-macroglobulin-like protein 1	0	1	0.75	1.5	3.75	3	4
ENSMGAG00000000842	GPC1	glypican 1	535.25	549.25	580.25	405	429	350	411.75
ENSMGAG00000000843	ZMAT2	zinc finger matrin-type 2	1615.5	1414.75	1499.5	1420.25	1460.75	1713.25	1244.75
ENSMGAG00000000844	PI4KA	phosphatidylinositol 4-kinase alpha	2676.25	2903	2784.75	3350.5	3244.5	3433	2975
ENSMGAG00000000845	FBXW5	F-box and WD repeat domain containing 5 [Source:HGNC Symbol;Acc:HGNC:13613]	910	1056.75	970	953.25	955.25	736.75	893
ENSMGAG00000000846	LOC104914643	thaicobrin-like	16	32	18.25	45	40.5	37	54.75
ENSMGAG00000000847	LOC100547230	histidine--tRNA ligase, cytoplasmic-like	1372.5	1350	1318.25	1530.75	1363	1237.25	1076.5
ENSMGAG00000000848	GNL3	G protein nucleolar 3 [Source:HGNC Symbol;Acc:HGNC:29931]	1186	1083.5	1128.5	1161.25	1119.25	1210.25	947.25
ENSMGAG00000000849	LOC100550096	olfactory receptor 6B1-like	0	0	0	0	0	0	0
ENSMGAG00000000850	LOC100539172	butyrophilin subfamily 1 member A1-like	429.5	582.75	451.75	307.5	371.5	270.5	439.75
ENSMGAG00000000851	PUS3	pseudouridine synthase 3 [Source:HGNC Symbol;Acc:HGNC:25461]	214.75	215.25	229	219.75	256.25	185	187
ENSMGAG00000000852	KLHL33	kelch like family member 33	768.25	748.75	734.75	810.25	808.75	722.75	598.75
ENSMGAG00000000854	HYLS1	HYLS1 centriolar and ciliogenesis associated [Source:HGNC Symbol;Acc:HGNC:26558]	100	62.25	69	19.25	17.25	19.5	26.5
ENSMGAG00000000855	DLGAP4	DLG associated protein 4	9.75	9.5	10	2.25	7	1.25	3.25
ENSMGAG00000000857	CDON	Cell adhesion associated, oncogene regulated	419	464	502.5	337.75	550.5	312	420
ENSMGAG00000000858	SHF	Src homology 2 domain containing F	172.5	170.5	187.75	126.5	169	107.75	117
ENSMGAG00000000859	TRAF2	TNF receptor associated factor 2 [Source:HGNC Symbol;Acc:HGNC:12032]	446.5	520	417	482.5	469.75	443	443.25
ENSMGAG00000000861	GNRH1	gonadotropin releasing hormone 1 [Source:HGNC Symbol;Acc:HGNC:4419]	0	0	1.5	1	0.5	0	0
ENSMGAG00000000862	NECAB2	N-terminal EF-hand calcium binding protein 2	195.5	198	230.75	300	156.5	172	176
ENSMGAG00000000863	RSL1D1	ribosomal L1 domain containing 1	395	336.25	346.5	374.25	346.75	301.75	269.25
ENSMGAG00000000864	LOC100550755	probable G-protein coupled receptor 83	24.75	36.25	27.75	12.25	24	15.75	11.75
ENSMGAG00000000865	ENSMGAG00000000865	Claudin	2	0.25	3.25	1	0.25	6.5	3
ENSMGAG00000000866	DOCK5	dedicator of cytokinesis 5	280.5	281.75	247.25	275	235	170.5	251.5
ENSMGAG00000000867	NR0B2	nuclear receptor subfamily 0 group B member 2 [Source:HGNC Symbol;Acc:HGNC:7961]	8	9.25	5.25	3	6.25	4	5
ENSMGAG00000000868	GPN2	GPN-loop GTPase 2 [Source:HGNC Symbol;Acc:HGNC:25513]	274	255.75	275.75	209.5	244	208.25	177
ENSMGAG00000000869	SLC28A2	sodium/nucleoside cotransporter 1	17	13.25	21.75	6.75	10.25	14.25	22
ENSMGAG00000000870	MSTO1	misato 1, mitochondrial distribution and morphology regulator	274	280.75	280	272.25	264.5	292.75	229
ENSMGAG00000000871	HSDL1	hydroxysteroid dehydrogenase like 1 [Source:HGNC Symbol;Acc:HGNC:16475]	1055.5	1073.25	927.25	1760	1101.75	1302.25	1016.5
ENSMGAG00000000872	PARL	presenilin associated rhomboid like	729.25	657.75	699.5	838.25	691.5	779.25	591.5
ENSMGAG00000000873	EDA2R	ectodysplasin A2 receptor	178.5	272	240.5	77.75	117.5	38.75	106.5
ENSMGAG00000000875	TBC1D22B	TBC1 domain family member 22B	808.25	860.5	763.25	761.25	873	762.75	755.75
ENSMGAG00000000877	RANBP3	RAN binding protein 3	1827.75	1768.25	1701.75	1768.5	1740.5	1751.25	1619.25
ENSMGAG00000000878	GSPT1	G1 to S phase transition 1	1148.5	1132.25	1095	1332.25	1213	1226.25	1049.25
ENSMGAG00000000882	EDN2	endothelin 2	129.75	112.75	101.75	56	66	30	49.5
ENSMGAG00000000883	PBRM1	polybromo 1 [Source:HGNC Symbol;Acc:HGNC:30064]	1965.25	1932	1828.75	1933.5	1747.25	1768.5	1766.5
ENSMGAG00000000884	DAP3	death associated protein 3 [Source:HGNC Symbol;Acc:HGNC:2673]	994.25	910.75	965.5	898	932.5	789.5	703.25
ENSMGAG00000000885	LOC100550910	relaxin receptor 1-like	88.75	72.25	90	41.5	55.75	27	51.5
ENSMGAG00000000886	HSF4	heat shock transcription factor 4	39.75	29.5	25.25	13.75	16.5	16.75	17
ENSMGAG00000000887	YEATS2	YEATS domain containing 2 [Source:HGNC Symbol;Acc:HGNC:25489]	1566.75	1673.25	1514	1675.75	1499.75	1352.5	1560.75
ENSMGAG00000000888	SRSF6	serine and arginine rich splicing factor 6	6413	6982.75	6129.75	15432.5	5748.25	13463.5	7228.75
ENSMGAG00000000889	GGT7	Gamma-glutamyltransferase 7	140.75	201	164.25	161.5	156.75	171.5	197.5
ENSMGAG00000000890	LOC100545191	neurofascin	75.25	49.75	62.75	6	23.75	14.25	26.5
ENSMGAG00000000891	PIM1	Pim-1 proto-oncogene, serine/threonine kinase	68.5	58.5	60.25	59.75	77.25	45.75	53
ENSMGAG00000000893	MRPS16	mitochondrial ribosomal protein S16	95	78.5	68	97	84.75	100.75	73.25
ENSMGAG00000000894	DPP7	dipeptidyl peptidase 7 [Source:HGNC Symbol;Acc:HGNC:14892]	642.5	603	604.5	625.25	678.5	593	602.5
ENSMGAG00000000895	CACNA1S	calcium voltage-gated channel subunit alpha1 S	9.25	16.25	14.5	15	12.25	6.5	10.75
ENSMGAG00000000896	DND1	DND microRNA-mediated repression inhibitor 1	0.5	1.25	2	0	1.25	0	0.25
ENSMGAG00000000897	SLC45A1	solute carrier family 45 member 1 [Source:HGNC Symbol;Acc:HGNC:17939]	528.75	680.5	527.75	529.75	566	400	566
ENSMGAG00000000898	ST3GAL4	ST3 beta-galactoside alpha-2,3-sialyltransferase 4 [Source:HGNC Symbol;Acc:HGNC:10864]	2024	2089.5	2047.75	1087.5	1459	1652.5	1943.75
ENSMGAG00000000901	IK	IK cytokine	2473	2397.25	2244.25	2532	2484	2455.25	2194.25
ENSMGAG00000000902	SCMH1	Scm polycomb group protein homolog 1	440.25	439.5	449	379.25	446.75	309.75	349
ENSMGAG00000000903	MATK	megakaryocyte-associated tyrosine kinase [Source:HGNC Symbol;Acc:HGNC:6906]	220.25	218	185.5	109.25	128.5	132.75	157
ENSMGAG00000000904	NRG3	neuregulin 3 [Source:HGNC Symbol;Acc:HGNC:7999]	3.5	4.75	3.75	3.5	2	4.5	2.75
ENSMGAG00000000905	ASH1L	ASH1 like histone lysine methyltransferase	4298	4965.75	4119.5	5095.25	4676.5	4194.75	4635.25
ENSMGAG00000000906	FBXL8	F-box and leucine rich repeat protein 8	497.5	508.5	464.75	415.75	427.75	467.25	455
ENSMGAG00000000907	ERRFI1	ERBB receptor feedback inhibitor 1 [Source:HGNC Symbol;Acc:HGNC:18185]	302.25	345.25	300.25	325.75	298	295	306
ENSMGAG00000000909	LOC100542387	tumor necrosis factor receptor type 1-associated DEATH domain protein-like	34.25	47.25	38.25	38.5	44	28	39
ENSMGAG00000000910	SH2D4B	SH2 domain containing 4B [Source:HGNC Symbol;Acc:HGNC:31440]	2.25	1.75	3.5	21.75	20.5	67.25	58.25
ENSMGAG00000000911	PARK7	Parkinsonism associated deglycase [Source:HGNC Symbol;Acc:HGNC:16369]	1808	1633	1659.25	1813.25	1738.5	2032.5	1517.75
ENSMGAG00000000912	PRF1	perforin 1	18.25	20.75	14.5	29	13.5	23.75	17
ENSMGAG00000000914	ALPK3	Alpha kinase 3	123.25	140.75	141.75	461.5	222	174.25	224
ENSMGAG00000000915	TGIF2	TGFB induced factor homeobox 2	127.5	103	125.5	74.25	75.5	44.5	54.5
ENSMGAG00000000916	NT5DC2	5'-nucleotidase domain containing 2 [Source:HGNC Symbol;Acc:HGNC:25717]	403.25	397	457	438.25	375.5	501.5	342.25
ENSMGAG00000000917	B3GNT9	UDP-GlcNAc:betaGal beta-1,3-N-acetylglucosaminyltransferase 9	108.5	102.75	112.25	41	66.75	49.75	66
ENSMGAG00000000918	C13H16orf70	chromosome 13 open reading frame, human C16orf70	682	687.75	681.25	757.75	736.25	814.5	716.5
ENSMGAG00000000919	SNX29	Sorting nexin 29	12.75	12.25	12.75	15.75	16.25	11.75	11.25
ENSMGAG00000000920	LOC104913644	kelch-like protein 9	608.5	623.75	604.75	414.75	510.5	582.5	534.5
ENSMGAG00000000922	TNFRSF9	TNF receptor superfamily member 9 [Source:HGNC Symbol;Acc:HGNC:11924]	35.25	25	34.5	39.75	19.75	28.25	30.5
ENSMGAG00000000923	CCDC189	coiled-coil domain containing 189	1726.75	1544.75	1334.25	1205	1123.5	1200.75	1448.25
ENSMGAG00000000924	FAM135A	family with sequence similarity 135 member A [Source:HGNC Symbol;Acc:HGNC:21084]	930	871.75	810	928.5	868.25	845.5	800.5
ENSMGAG00000000925	KIRREL3	kirre like nephrin family adhesion molecule 3 [Source:HGNC Symbol;Acc:HGNC:23204]	46.25	31	46.75	19.75	29.75	14.75	25
ENSMGAG00000000926	ENSMGAG00000000926	Uncharacterized protein	0.25	1	0.5	0	0	0.25	0.5
ENSMGAG00000000927	RAX2	retina and anterior neural fold homeobox 2	0	0	0	0	0	0	0
ENSMGAG00000000928	SSR2	signal sequence receptor subunit 2	2758.75	2459.5	2561.5	3140.5	3309.25	2735.25	2687.5
ENSMGAG00000000929	CTPS1	CTP synthase 1	612.75	515.75	551.75	549	397.5	457.25	360.75
ENSMGAG00000000930	TRMT1L	tRNA methyltransferase 1 like [Source:HGNC Symbol;Acc:HGNC:16782]	1539	1511.75	1428.5	1493.25	1367.25	1145	1183.25
ENSMGAG00000000931	MAN1B1	mannosidase alpha class 1B member 1 [Source:HGNC Symbol;Acc:HGNC:6823]	1246.5	1307.5	1219	1870.25	1785	1394.75	1524.25
ENSMGAG00000000932	LOC100540409	mucosa-associated lymphoid tissue lymphoma translocation protein 1-like	40.75	29	38.75	29	28.75	13	24.5
ENSMGAG00000000933	SERPIND1	serpin family D member 1 [Source:HGNC Symbol;Acc:HGNC:4838]	63	58.5	47.5	128	119.75	72.5	86.75
ENSMGAG00000000935	NEDD4L	NEDD4 like E3 ubiquitin protein ligase	5307.25	5673.25	4840.75	13541.2	8770	3261	6312
ENSMGAG00000000936	LOC104912747	mucosa-associated lymphoid tissue lymphoma translocation protein 1-like	822.75	819.5	817	927.5	889.75	852	807.25
ENSMGAG00000000937	CTSS	cathepsin S [Source:HGNC Symbol;Acc:HGNC:2545]	0	0	0	0	0	0	0
ENSMGAG00000000938	ENSMGAG00000000938	Uncharacterized protein	127.5	122.75	128.25	139	134	101	122.75
ENSMGAG00000000939	UTS2	urotensin 2 [Source:HGNC Symbol;Acc:HGNC:12636]	1.25	0	0.25	0.25	0.25	1	0
ENSMGAG00000000940	ZNF592	zinc finger protein 592	736.75	739	726.75	711.75	711.75	662.75	689.25
ENSMGAG00000000941	GNAO1	G protein subunit alpha o1	169.5	151.75	131.75	50	126.25	31.25	89.75
ENSMGAG00000000942	CPPED1	calcineurin like phosphoesterase domain containing 1	365.5	396.25	319	350.5	341.25	327.25	306
ENSMGAG00000000943	ARNT	aryl hydrocarbon receptor nuclear translocator [Source:HGNC Symbol;Acc:HGNC:700]	1814	1941.25	1664.75	1610	1788	1188	1527
ENSMGAG00000000944	EDF1	endothelial differentiation related factor 1 [Source:HGNC Symbol;Acc:HGNC:3164]	3686.5	3515.5	3661.25	4087.5	4239.75	5078.25	3374.5
ENSMGAG00000000945	MYL9	myosin light chain 9	24936.8	32068.5	33439.5	22011.5	26748	20156	22231.8
ENSMGAG00000000947	MT4	metallothionein 4 [Source:HGNC Symbol;Acc:HGNC:18705]	12	16.25	9.5	282.75	143.5	348.25	176.5
ENSMGAG00000000948	MAMDC4	MAM domain containing 4 [Source:HGNC Symbol;Acc:HGNC:24083]	34	34.5	30	42.25	40	42.75	45.25
ENSMGAG00000000949	HIC2	HIC ZBTB transcriptional repressor 2	41.25	56	37.75	28.5	61	27.5	53.75
ENSMGAG00000000950	ERCC4	ERCC excision repair 4, endonuclease catalytic subunit	351	333.75	313.5	290	292.25	235	253.25
ENSMGAG00000000952	PER3	period circadian regulator 3 [Source:HGNC Symbol;Acc:HGNC:8847]	143.25	114.75	142.5	190.5	100.5	109.75	268.25
ENSMGAG00000000953	FTSJ3	FtsJ RNA 2'-O-methyltransferase 3 [Source:HGNC Symbol;Acc:HGNC:17136]	806.5	706.5	706.5	617.75	788	592.25	554
ENSMGAG00000000954	TSPAN14	tetraspanin 14 [Source:HGNC Symbol;Acc:HGNC:23303]	493.25	503.5	454	459.25	504.25	361.5	466.25
ENSMGAG00000000956	ENSMGAG00000000956	Musculoskeletal embryonic nuclear protein 1	179.25	214.75	255.25	127.25	122.5	111.75	114.5
ENSMGAG00000000957	KLHL24	kelch like family member 24 [Source:HGNC Symbol;Acc:HGNC:25947]	2362.75	2400.5	2341	3131.75	3248.75	2658	2566.5
ENSMGAG00000000958	APBA3	amyloid beta precursor protein binding family A member 3 [Source:HGNC Symbol;Acc:HGNC:580]	1284.75	1322.5	1246.75	976.75	998.25	766.75	878.75
ENSMGAG00000000959	UBE2L3	ubiquitin conjugating enzyme E2 L3	1530.25	1479.75	1526.75	1468.25	1454.25	1585	1208.5
ENSMGAG00000000960	NCOA6	nuclear receptor coactivator 6	2121.25	2253.75	1982	2233.5	1983	2000.25	2072.25
ENSMGAG00000000961	SMIM4	small integral membrane protein 4 [Source:HGNC Symbol;Acc:HGNC:37257]	132.5	99.25	104.25	103.5	96.5	94.25	80.75
ENSMGAG00000000962	AMFR	autocrine motility factor receptor	1263.25	1421.25	1345.25	1740.5	1791.75	1517	1500.25
ENSMGAG00000000963	TJP3	tight junction protein 3 [Source:HGNC Symbol;Acc:HGNC:11829]	2809	3045.25	2508.5	2038.25	2968.75	1811	2760.75
ENSMGAG00000000964	STAB1	stabilin 1 [Source:HGNC Symbol;Acc:HGNC:18628]	959.5	1191.25	941.75	681.75	813.5	477.25	841.5
ENSMGAG00000000966	SEC11A	SEC11 homolog A, signal peptidase complex subunit [Source:HGNC Symbol;Acc:HGNC:17718]	489	379	426.5	386.75	388.75	465.75	335
ENSMGAG00000000967	ETS1	ETS proto-oncogene 1, transcription factor [Source:HGNC Symbol;Acc:HGNC:3488]	113.75	141	119.5	88.75	77.5	68.75	77.75
ENSMGAG00000000968	KIF21B	kinesin family member 21B	98.5	114.5	81	104.25	78.5	51.25	78.75
ENSMGAG00000000969	TMCO6	transmembrane and coiled-coil domains 6	602	654.75	637	499.75	645.25	488.75	553.5
ENSMGAG00000000971	ADARB1	adenosine deaminase RNA specific B1 [Source:HGNC Symbol;Acc:HGNC:226]	345.25	379.5	347	359	399.75	351.5	331
ENSMGAG00000000972	MKL2	myocardin related transcription factor B	587	659.75	550.25	593.75	559.75	433	535
ENSMGAG00000000975	NUDT21	nudix hydrolase 21 [Source:HGNC Symbol;Acc:HGNC:13870]	1752	1386.25	1470.5	1336.5	1312.75	1384	1119.25
ENSMGAG00000000976	FLI1	Fli-1 proto-oncogene, ETS transcription factor [Source:HGNC Symbol;Acc:HGNC:3749]	96.25	112	89	82.5	87.75	68.25	81.5
ENSMGAG00000000977	NMB	neuromedin B	2.5	1.25	0.5	0.5	0.5	0.75	0.25
ENSMGAG00000000978	YDJC	YdjC chitooligosaccharide deacetylase homolog	232.75	269.25	242	332.25	269.75	228.5	242
ENSMGAG00000000979	DUOXA1	dual oxidase maturation factor 1	0.75	0.25	0.25	0	0	0	0.25
ENSMGAG00000000980	IVNS1ABP	influenza virus NS1A binding protein [Source:HGNC Symbol;Acc:HGNC:16951]	4058	4691	3945.75	5077.75	4435.5	5070.5	5066.75
ENSMGAG00000000981	CNTN2	contactin 2	131.5	114	93.5	33.75	39.5	64	80
ENSMGAG00000000982	OGFOD1	2-oxoglutarate and iron dependent oxygenase domain containing 1	768.75	706.75	715.75	636.5	710	574.75	559.75
ENSMGAG00000000983	KLHL6	kelch like family member 6 [Source:HGNC Symbol;Acc:HGNC:18653]	54.5	43.75	44.5	32.5	38.75	34	32.75
ENSMGAG00000000985	TMEM173	stimulator of interferon response cGAMP interactor 1	238.5	237.25	265.25	109.5	145.75	189	200.75
ENSMGAG00000000986	EPB41L1	erythrocyte membrane protein band 4.1 like 1	1746.25	2048	1900.5	2193	1920.25	2016	2035
ENSMGAG00000000987	DUOXA2	dual oxidase maturation factor 2	0.75	0.75	3.5	0.5	2	3.25	4
ENSMGAG00000000988	UAP1L1	UDP-N-acetylglucosamine pyrophosphorylase 1 like 1 [Source:HGNC Symbol;Acc:HGNC:28082]	359.5	300.25	345.5	241	231.5	150.5	193.25
ENSMGAG00000000989	EXOSC3	Ribosomal RNA-processing protein 40	228.75	199.75	217.5	226.25	202.5	242	184.5
ENSMGAG00000000991	ABCF2	ATP binding cassette subfamily F member 2	1116	1066	1035.25	1335	1233.25	1136.75	908.25
ENSMGAG00000000992	PSMC5	proteasome 26S subunit, ATPase 5 [Source:NCBI gene (formerly Entrezgene);Acc:100539380]	1663.25	1707.75	1656	2152.5	2096.5	1901.25	1653.25
ENSMGAG00000000993	DNAJC8	DnaJ heat shock protein family (Hsp40) member C8	1403	1237.5	1247.25	1363.25	1280	1668.75	1163.25
ENSMGAG00000000994	DUOX2	dual oxidase 2	12.5	31.25	36	50.75	53.25	58.25	57.5
ENSMGAG00000000995	FAM213A	family with sequence similarity 213 member A	210.5	174.5	160.75	150.5	191	297.5	223.5
ENSMGAG00000000998	LOC100548610	PH and SEC7 domain-containing protein 2-like	26.75	26	29.75	7.25	8.25	6	11.25
ENSMGAG00000000999	BBS2	Bardet-Biedl syndrome 2	1025	1090	916.25	1692	962.75	1237.5	980.25
ENSMGAG00000001000	HNRNPR	heterogeneous nuclear ribonucleoprotein R	1982	1890.25	1861	1891.5	1900.5	2024	1663.25
ENSMGAG00000001001	ENSMGAG00000001001	Proteoglycan 4	0	0.25	0	0.5	0.5	0	0.75
ENSMGAG00000001002	TOP3B	DNA topoisomerase III beta	656.25	614.75	575.75	614	532.5	551	528.75
ENSMGAG00000001003	KCNJ5	potassium inwardly rectifying channel subfamily J member 5 [Source:HGNC Symbol;Acc:HGNC:6266]	12.25	13.25	28	33.75	29.75	10.25	4.25
ENSMGAG00000001004	PARN	poly(A)-specific ribonuclease [Source:HGNC Symbol;Acc:HGNC:8609]	619.25	608	593.5	592	556.5	618.5	514
ENSMGAG00000001005	ARHGAP32	Rho GTPase activating protein 32 [Source:HGNC Symbol;Acc:HGNC:17399]	1090.5	1162.75	1003.5	876.25	1013.75	645	987
ENSMGAG00000001006	MAT1A	methionine adenosyltransferase 1A	111	96.5	116.75	135	172.25	108	121
ENSMGAG00000001007	TLDC2	TBC/LysM-associated domain containing 2	0.5	0.25	0.5	0	0	0	0.25
ENSMGAG00000001008	SAMHD1	SAM and HD domain containing deoxynucleoside triphosphate triphosphohydrolase 1	803	698.5	686.25	548	523	650.25	547.75
ENSMGAG00000001009	SMARCD2	SWI/SNF related, matrix associated, actin dependent regulator of chromatin, subfamily d, member 2	2101.75	2037	1951	1404	2174.5	1367.25	1713
ENSMGAG00000001010	GPR148	G protein-coupled receptor 148	0	0	0	0.75	0	0	0
ENSMGAG00000001011	VAMP3	vesicle associated membrane protein 3 [Source:HGNC Symbol;Acc:HGNC:12644]	1222.5	1137.5	1154.5	1296	1159	1344.25	1035.5
ENSMGAG00000001012	NRG2	Neuregulin 2	7.75	7	8.25	2.75	3.25	2.75	1.5
ENSMGAG00000001013	TPR	translocated promoter region, nuclear basket protein [Source:HGNC Symbol;Acc:HGNC:12017]	2296.25	2412	2212.75	2491	2307.75	2426	2307.75
ENSMGAG00000001014	AMER3	APC membrane recruitment protein 3	5.25	8.75	4.25	8.5	7.25	2	6.25
ENSMGAG00000001015	ELAVL1	ELAV like RNA binding protein 1	3061.75	2811.75	2747.5	2901.75	2872	3261.5	2601.5
ENSMGAG00000001016	LOC100543166	nuclear pore complex protein Nup93-like	700.75	527.75	580.5	446.75	415	584.25	423.75
ENSMGAG00000001017	CAMTA1	calmodulin binding transcription activator 1 [Source:HGNC Symbol;Acc:HGNC:18806]	967.25	955.5	977.75	813.5	988.75	770.5	832.5
ENSMGAG00000001018	SETDB1	SET domain bifurcated histone lysine methyltransferase 1 [Source:HGNC Symbol;Acc:HGNC:10761]	1794.75	1905	1626.75	1503.25	1649	1125.25	1590
ENSMGAG00000001019	BARX2	BARX homeobox 2 [Source:HGNC Symbol;Acc:HGNC:956]	1198.5	1019.25	983.75	491.25	753.5	977.75	926
ENSMGAG00000001020	PSMD4	proteasome 26S subunit, non-ATPase 4 [Source:HGNC Symbol;Acc:HGNC:9561]	1192	1071.25	1123.75	1193	1221.25	1100.25	953
ENSMGAG00000001021	LOC100544917	rho guanine nucleotide exchange factor 4	178	186.75	164.25	215	141.25	111.25	162.5
ENSMGAG00000001022	ASIC2	Acid sensing ion channel subunit 2	218.25	200	199.25	58.75	78.5	86	73.75
ENSMGAG00000001026	LOC100546734	transmembrane protein 45B-like	4057.75	3972	3634	1646.75	3190.25	2572.25	3289
ENSMGAG00000001030	ENSMGAG00000001030	Amino acid transporter	2.75	6	2.25	2.75	2.5	1.25	1.25
ENSMGAG00000001031	NEFL	neurofilament, light polypeptide	118.75	76.25	105.75	124	179	114.5	81.5
ENSMGAG00000001032	LOC100551007	pulmonary surfactant-associated protein A-like	0	0.25	0.25	1.75	1.5	5	2.25
ENSMGAG00000001033	LOC104909200	interferon-induced guanylate-binding protein 1-like	13.75	5	8.5	2.5	15	2.5	2
ENSMGAG00000001034	SAPCD2	suppressor APC domain containing 2 [Source:HGNC Symbol;Acc:HGNC:28055]	276.75	236.5	206.25	155	189	151.75	166
ENSMGAG00000001038	LOC100551159	pulmonary surfactant-associated protein A-like	1	1	2.5	10.5	6	27.5	11.25
ENSMGAG00000001039	KCNV2	potassium voltage-gated channel modifier subfamily V member 2 [Source:HGNC Symbol;Acc:HGNC:19698]	0	0	0	0	0	0	0
ENSMGAG00000001040	FAM168B	family with sequence similarity 168 member B	110	112.5	114.25	90.75	102.75	69.75	82.5
ENSMGAG00000001041	PIGU	phosphatidylinositol glycan anchor biosynthesis class U	320.25	334	322.75	335.25	349.5	318.25	330.5
ENSMGAG00000001043	PPM1F	Protein phosphatase, Mg2+/Mn2+ dependent 1F	102.25	132	115.25	139	111.75	85.5	101.75
ENSMGAG00000001045	RBBP5	RB binding protein 5, histone lysine methyltransferase complex subunit	676.75	647.25	637.75	683.25	644.75	603.25	585.75
ENSMGAG00000001046	FAM207A	family with sequence similarity 207 member A [Source:HGNC Symbol;Acc:HGNC:15811]	1192.25	1022.5	1050.75	833.25	858	986	772.5
ENSMGAG00000001047	LOC100549167	mannose-binding protein A-like	26.5	24.5	17.25	11.25	12.75	14.75	13.5
ENSMGAG00000001049	LOC100546884	transmembrane protein 45B-like	4.25	5.5	3.25	1.5	5	4.5	3.25
ENSMGAG00000001050	CRHR1	corticotropin-releasing factor receptor 1	0	0	0	0	0	0	0
ENSMGAG00000001051	LOC100540564	scaffold attachment factor B2-like	1367.5	1439.5	1186	1389.75	1249.75	1065.5	1248
ENSMGAG00000001052	plekhb2	pleckstrin homology domain containing B2	1249.25	1380	1275.5	1311.75	1387.75	1197.5	1174.75
ENSMGAG00000001054	ENSMGAG00000001054	Adenylate cyclase (EC 4.6.1.1)	0.25	0	0	0.25	0.25	0.25	0.5
ENSMGAG00000001055	CHD5	chromodomain helicase DNA binding protein 5 [Source:HGNC Symbol;Acc:HGNC:16816]	586	700.75	617.75	696	680	610.25	644.25
ENSMGAG00000001056	APLP2	amyloid beta precursor like protein 2 [Source:HGNC Symbol;Acc:HGNC:598]	6075	7522.5	7057.5	9150.5	9965.5	8161.25	9954.25
ENSMGAG00000001057	ENSMGAG00000001057	Cysteine-rich and transmembrane domain-containing protein 1	2179	2007.25	1799.75	1606.75	1418	1008.25	1083.25
ENSMGAG00000001059	NEFM	neurofilament medium	4.25	3	9.5	4.25	5.5	9.25	5
ENSMGAG00000001060	PFDN1	Prefoldin subunit 1	172.25	143.75	152.5	187.5	167	150.5	150.25
ENSMGAG00000001061	MAPK1	mitogen-activated protein kinase 1	4002.5	4104.5	3887.75	4330.75	4334.5	4114	3561.75
ENSMGAG00000001062	RBL1	RB transcriptional corepressor like 1	372.5	367	370.5	292.25	281.75	240.75	284.25
ENSMGAG00000001063	STX12	syntaxin 12	593	666.25	635.25	692.5	684.75	696	646.25
ENSMGAG00000001064	NFYC	nuclear transcription factor Y subunit gamma	1169.75	1289.5	1195	958.25	1267.75	740.75	957.5
ENSMGAG00000001065	PI4KB	phosphatidylinositol 4-kinase beta [Source:HGNC Symbol;Acc:HGNC:8984]	2892.75	3000	2731.25	2152	2902.75	2056.25	2380.25
ENSMGAG00000001066	LOC104911307	GTPase IMAP family member 7-like	29.25	26.25	30.75	25.25	16.75	21.5	19
ENSMGAG00000001067	BFAR	bifunctional apoptosis regulator	974.5	851.25	888	781.25	765.75	885	676.75
ENSMGAG00000001068	SLC4A9	solute carrier family 4 member 9	7.75	6.5	5.5	1.5	0	0.25	0.75
ENSMGAG00000001069	RASGEF1A	RasGEF domain family member 1A [Source:HGNC Symbol;Acc:HGNC:24246]	242	245.5	209.5	151.75	181.5	235.75	257.5
ENSMGAG00000001070	ENTPD2	ectonucleoside triphosphate diphosphohydrolase 2 [Source:HGNC Symbol;Acc:HGNC:3364]	1389	1555.5	1854.25	576	787.25	463.5	605
ENSMGAG00000001071	LOC100545886	uncharacterized LOC100545886	41.25	63.5	51.25	51.25	61.5	59.75	60
ENSMGAG00000001072	ENSMGAG00000001072	Phospholipase A2 (EC 3.1.1.4)	1	1.25	2	1	7	5.75	4.5
ENSMGAG00000001073	ITGB2	integrin subunit beta 2 [Source:HGNC Symbol;Acc:HGNC:6155]	253	216	225.5	162.75	121	116.75	148.75
ENSMGAG00000001074	SLC12A3	solute carrier family 12 member 3	7.25	5.75	5.5	7.5	5.5	6	11.25
ENSMGAG00000001075	ASB10	ankyrin repeat and SOCS box containing 10 [Source:HGNC Symbol;Acc:HGNC:17185]	2.75	1.25	3	0	0	0.25	0
ENSMGAG00000001079	ZC3H7A	zinc finger CCCH-type containing 7A [Source:HGNC Symbol;Acc:HGNC:30959]	1006.25	1086.25	1022.5	1433.5	1095.5	1512.75	1092.25
ENSMGAG00000001080	YPEL1	yippee like 1	736.75	745.5	666.5	1080.75	853.75	610	448.75
ENSMGAG00000001081	ARL8A	ADP ribosylation factor like GTPase 8A	609.5	533.75	541.5	514.25	523.25	467	452.75
ENSMGAG00000001082	MALT1	MALT1 paracaspase [Source:HGNC Symbol;Acc:HGNC:6819]	388.75	405.75	352.5	405	372.5	366.75	362.75
ENSMGAG00000001083	SLC52A3	solute carrier family 52 member 3	259	249.25	253.25	194	280	186.5	207.5
ENSMGAG00000001084	LOC100545500	fibrinogen-like protein 1	0	0.75	0.25	0.25	0.25	0.25	0.5
ENSMGAG00000001085	PPIL2	peptidylprolyl isomerase like 2	2559.5	2554.5	2696.75	3352.25	3789.75	2122.5	1572.5
ENSMGAG00000001086	LOC100545656	fibrinogen-like protein 1	0	0	0	0	0	0	0
ENSMGAG00000001087	LOC100541326	zinc metalloproteinase-disintegrin-like MTP4	299.25	409.5	354.25	530.5	493.5	257	779
ENSMGAG00000001088	SORD	sorbitol dehydrogenase	217.5	172.25	185.25	135.5	134.25	136	125.25
ENSMGAG00000001091	PTPN7	protein tyrosine phosphatase non-receptor type 7	155.75	184.25	148.25	117.75	97.5	116	87
ENSMGAG00000001094	LOC100545947	UDP-glucose:glycoprotein glucosyltransferase 1	926.25	983	886.25	1176.25	1043.25	871	870.25
ENSMGAG00000001096	DSTYK	dual serine/threonine and tyrosine protein kinase [Source:HGNC Symbol;Acc:HGNC:29043]	480.5	493	410	341	423.75	329.5	437
ENSMGAG00000001098	TRIM2	tripartite motif containing 2 [Source:HGNC Symbol;Acc:HGNC:15974]	364	308.25	262.75	315.25	381.5	175.5	337
ENSMGAG00000001100	ENSMGAG00000001100	Chloride intracellular channel 3	94.5	76.25	93.25	55.75	54.25	96.5	77.75
ENSMGAG00000001102	WDR7	WD repeat domain 7	274.5	320	280.25	355.75	326.25	281.25	303.5
ENSMGAG00000001104	ATP13A1	ATPase 13A1	1054	1027.25	936	1035.5	1112.75	851.75	903
ENSMGAG00000001105	H2BE1	H2B.E variant histone 1 [Source:HGNC Symbol;Acc:HGNC:53833]	0	0	0	0.75	0.25	0	0
ENSMGAG00000001108	ENSMGAG00000001108	lncRNA	0	0.5	0	0	0.5	0	0
ENSMGAG00000001109	ABCA2	ATP binding cassette subfamily A member 2	2703.5	3225.5	2748.25	2670.75	3286	1871.5	2910.5
ENSMGAG00000001111	STX1A	syntaxin 1A	65.5	62.75	63.75	52.25	69.5	30.75	69
ENSMGAG00000001112	PRDM10	PR/SET domain 10 [Source:HGNC Symbol;Acc:HGNC:13995]	1787.5	2012	1633	1609.75	1498.25	1223.25	1597.5
ENSMGAG00000001113	GABPB2	GA binding protein transcription factor subunit beta 2 [Source:HGNC Symbol;Acc:HGNC:28441]	728.5	623.5	565.25	288.25	360.75	294	348
ENSMGAG00000001114	ITGB3	integrin subunit beta 3	859.5	879.25	970.5	1434.75	906.75	1941.5	1137.75
ENSMGAG00000001115	ENSMGAG00000001115	receptor-type tyrosine-protein phosphatase V-like	624.75	872	654.75	137.75	402.5	254	349.25
ENSMGAG00000001116	PPP1R8	protein phosphatase 1 regulatory subunit 8 [Source:HGNC Symbol;Acc:HGNC:9296]	570.5	537.25	518.5	478.25	476.25	453.75	427
ENSMGAG00000001117	CSGALNACT2	chondroitin sulfate N-acetylgalactosaminyltransferase 2 [Source:HGNC Symbol;Acc:HGNC:24292]	544	577.25	540.25	974.75	559	539.25	545
ENSMGAG00000001118	ITIH3	inter-alpha-trypsin inhibitor heavy chain 3 [Source:HGNC Symbol;Acc:HGNC:6168]	1.75	0.75	1	2.5	1.25	2.25	1
ENSMGAG00000001119	MINDY1	MINDY lysine 48 deubiquitinase 1 [Source:HGNC Symbol;Acc:HGNC:25648]	1659.5	1795	1614	1647.25	2055.75	1276.75	1735.25
ENSMGAG00000001120	FZD9	frizzled class receptor 9	1447	1378	1265.75	1475.75	1568.75	777.25	946.5
ENSMGAG00000001121	LOC100539169	chromodomain-helicase-DNA-binding protein 6	1432.75	1676.75	1535.25	1562.25	1647.75	1067	1485.25
ENSMGAG00000001122	THEMIS2	thymocyte selection associated family member 2	50	49.5	55	25	29.75	21.75	29.5
ENSMGAG00000001123	TMOD4	tropomodulin 4 [Source:HGNC Symbol;Acc:HGNC:11874]	11.5	12.25	10.5	12.5	14.5	12.75	20.5
ENSMGAG00000001124	RET	ret proto-oncogene [Source:HGNC Symbol;Acc:HGNC:9967]	2212.75	1929.5	1968.75	4286.25	2974.75	657.75	1401.75
ENSMGAG00000001126	RFX5	regulatory factor X5 [Source:HGNC Symbol;Acc:HGNC:9986]	867	808.5	752.25	420.5	608	403	587.5
ENSMGAG00000001127	NEK4	NIMA related kinase 4 [Source:HGNC Symbol;Acc:HGNC:11399]	2028.75	1788.25	1735.25	1674.25	1613	2127.75	1785.5
ENSMGAG00000001128	RBPMS2	RNA binding protein with multiple splicing 2	648	773.75	817	623.75	937.25	537.5	675.75
ENSMGAG00000001129	PTGES3	prostaglandin E synthase 3 [Source:HGNC Symbol;Acc:HGNC:16049]	4543	3828	3979.25	4334	3964	5083.5	3831.75
ENSMGAG00000001130	NFRKB	nuclear factor related to kappaB binding protein [Source:HGNC Symbol;Acc:HGNC:7802]	802.75	883.75	777.5	973.75	840.5	686.75	744.5
ENSMGAG00000001131	RPA2	replication protein A2	749.5	556	608.25	417.5	427.5	392.5	407.75
ENSMGAG00000001132	VPS72	vacuolar protein sorting 72 homolog [Source:HGNC Symbol;Acc:HGNC:11644]	269.5	243	214.75	177.75	163	132	161
ENSMGAG00000001133	ATP5B	ATP synthase F1 subunit beta	16062.8	14583.5	14845	16592	16518.5	9954.5	11805.5
ENSMGAG00000001134	MKS1	Meckel syndrome, type 1	978.75	928.5	861.75	862.5	766.75	774.75	775.25
ENSMGAG00000001135	LOC100544306	protein HIRA	2351.25	2263	2117.75	2764.75	2279.5	3013	2276.5
ENSMGAG00000001137	LOC100543274	selenium-binding protein 1-like	6.5	8.75	10.25	4.75	2.75	2.75	3
ENSMGAG00000001138	OAZ2	ornithine decarboxylase antizyme 2 [Source:NCBI gene (formerly Entrezgene);Acc:100539411]	939	877.25	884.5	971	1050.75	979.25	770.75
ENSMGAG00000001139	ODR4	odr-4 GPCR localization factor homolog [Source:HGNC Symbol;Acc:HGNC:24299]	615.5	564.5	578	716.5	611	537.25	508.25
ENSMGAG00000001140	ENSMGAG00000001140	PITH domain-containing protein	417.75	367.75	404.75	416.75	417	439.5	324.5
ENSMGAG00000001141	ENSMGAG00000001141	Uncharacterized protein	56.25	80.25	61.25	75.75	88.75	55.75	75.5
ENSMGAG00000001143	SMPDL3B	sphingomyelin phosphodiesterase acid like 3B [Source:HGNC Symbol;Acc:HGNC:21416]	270.25	300.75	284	472.25	438.5	526.75	465.25
ENSMGAG00000001145	STARD8	StAR related lipid transfer domain containing 8	871.25	702.5	684	897	370.25	229.25	251.75
ENSMGAG00000001147	ENSMGAG00000001147	Uncharacterized protein	345.5	333.5	321	259.25	304.5	242.75	269
ENSMGAG00000001148	SAP130	Sin3A associated protein 130 [Source:HGNC Symbol;Acc:HGNC:29813]	1283.5	1318.5	1212	1218	1236	1008	1092.75
ENSMGAG00000001149	C30H19orf70	chromosome 30 open reading frame, human C19orf70	430	407.75	404.25	433.25	489.5	299	314.5
ENSMGAG00000001150	NISCH	nischarin [Source:HGNC Symbol;Acc:HGNC:18006]	1246.5	1238.25	1173.75	1249	1213.25	1385.75	1238
ENSMGAG00000001151	ZNF609	zinc finger protein 609 [Source:HGNC Symbol;Acc:HGNC:29003]	2229.75	2194.75	1992.75	1738.25	2022.75	1454.75	1765.5
ENSMGAG00000001154	ST14	ST14 transmembrane serine protease matriptase [Source:HGNC Symbol;Acc:HGNC:11344]	3761.5	4301.25	3533.25	8653.5	3545.75	3040.75	3375.25
ENSMGAG00000001155	SELENBP1	selenium binding protein 1	6244.5	6014.75	5484	4965.75	5520.5	5997.75	5993.75
ENSMGAG00000001156	HSD11B1L	Hydroxysteroid 11-beta dehydrogenase 1 like	162.75	292.25	193.5	174.5	119	146.75	174.75
ENSMGAG00000001157	ESPL1	Extra spindle pole bodies like 1, separase	367.75	277.75	325.5	62.25	41.25	43	87
ENSMGAG00000001158	XKR8	XK related 8 [Source:HGNC Symbol;Acc:HGNC:25508]	107	106.5	110.5	73.25	97.25	74	88.25
ENSMGAG00000001160	BCL7B	BAF chromatin remodeling complex subunit BCL7B	559.5	557	576.25	525.25	638	428.5	467.75
ENSMGAG00000001161	PDC	phosducin [Source:HGNC Symbol;Acc:HGNC:8759]	0	0	0	0.75	0	0	0.25
ENSMGAG00000001162	ENSMGAG00000001162	Uncharacterized protein	1041.5	1060.5	986.25	914.75	964.25	935	1142
ENSMGAG00000001163	ENSMGAG00000001163	KRAB domain-containing protein	65.5	75.75	55.25	52.25	50.75	30.25	50.75
ENSMGAG00000001165	SEC11C	SEC11 homolog C, signal peptidase complex subunit [Source:HGNC Symbol;Acc:HGNC:23400]	949	915.5	917.5	1651.25	1357.5	1519.5	1189.75
ENSMGAG00000001166	TRIP4	thyroid hormone receptor interactor 4 [Source:HGNC Symbol;Acc:HGNC:12310]	436.75	380.75	401	395.25	393.75	419.25	355.75
ENSMGAG00000001167	PIP5K1A	phosphatidylinositol-4-phosphate 5-kinase type 1 alpha [Source:HGNC Symbol;Acc:HGNC:8994]	314	358.5	352.5	317	376	214.5	269.25
ENSMGAG00000001168	FUT7	fucosyltransferase 7	29	33.75	22.75	19.75	23	19.5	19
ENSMGAG00000001169	CELF5	CUGBP Elav-like family member 5 [Source:HGNC Symbol;Acc:HGNC:14058]	48.75	44.5	47.75	30.75	47	37.5	51
ENSMGAG00000001170	BMS1	BMS1 ribosome biogenesis factor [Source:HGNC Symbol;Acc:HGNC:23505]	979.75	888.5	908.25	893	847.25	947.75	790.75
ENSMGAG00000001171	SPON1	spondin 1	251.25	362.75	348.75	239.75	241	104	172.5
ENSMGAG00000001174	EYA3	EYA transcriptional coactivator and phosphatase 3	1283.25	1242.75	1140	1276.5	1134	1253.75	1104.5
ENSMGAG00000001176	LMAN1	lectin, mannose binding 1	674.5	647.75	636.5	1027	843.25	563.75	654.75
ENSMGAG00000001177	MRPL40	mitochondrial ribosomal protein L40	1079.25	961.5	1047.25	1243.75	1120.75	1364	921.75
ENSMGAG00000001178	TBL2	transducin beta like 2 [Source:HGNC Symbol;Acc:HGNC:11586]	160	167.25	153.75	162	171.5	128	126.75
ENSMGAG00000001179	RABL6	RAB, member RAS oncogene family like 6 [Source:HGNC Symbol;Acc:HGNC:24703]	1026.25	1058.25	1024	1141.5	1087.5	1054.5	996.5
ENSMGAG00000001180	ENSMGAG00000001180	ANK_REP_REGION domain-containing protein	435.75	491.25	407.75	452.25	475.75	368	431.25
ENSMGAG00000001181	UFD1L	ubiquitin fusion degradation 1 like (yeast)	984	932.5	936.5	1170.25	1070.75	1120.25	886.75
ENSMGAG00000001182	HMCN1	hemicentin 1	579.5	554.75	558	161.75	234.25	341	369.75
ENSMGAG00000001183	YIPF6	Yip1 domain family member 6	438.75	451.75	415.75	565	473.5	377.5	379.5
ENSMGAG00000001184	TNNC1	troponin C1, slow skeletal and cardiac type [Source:HGNC Symbol;Acc:HGNC:11943]	8.5	7.25	11	11.5	13.75	15.75	10.5
ENSMGAG00000001185	TMEM131L	transmembrane 131 like [Source:HGNC Symbol;Acc:HGNC:29146]	1297.5	1141	1190.5	915.75	983.5	988.75	923
ENSMGAG00000001186	ENSMGAG00000001186	TPR_REGION domain-containing protein	111	90.75	105	65.75	86.25	72.75	78.25
ENSMGAG00000001187	MLXIPL	MLX interacting protein like	0	0	0	0	0	0	0
ENSMGAG00000001190	KIAA1549L	KIAA1549 like [Source:HGNC Symbol;Acc:HGNC:24836]	296.5	311.5	153.75	384.75	307.25	344	306.5
ENSMGAG00000001191	CSNK1G1	casein kinase 1 gamma 1 [Source:HGNC Symbol;Acc:HGNC:2454]	952	914.75	856.5	1374.25	930.25	1581.5	1186.5
ENSMGAG00000001193	POGZ	pogo transposable element derived with ZNF domain	724.5	806.75	751.25	686	668	531.25	656.75
ENSMGAG00000001194	GRIN3A	glutamate ionotropic receptor NMDA type subunit 3A [Source:HGNC Symbol;Acc:HGNC:16767]	42.5	51	39	65.5	43.25	69.5	73.75
ENSMGAG00000001195	LOC104914419	beta-keratin-related protein-like	0	0	0	0	0	0	0
ENSMGAG00000001196	NOL9	nucleolar protein 9 [Source:HGNC Symbol;Acc:HGNC:26265]	2936.25	2957.75	2620.5	2597.25	2681.5	2388.5	2415.25
ENSMGAG00000001197	ENSMGAG00000001197	Keratin	0	0	0	0	0	0	0
ENSMGAG00000001202	HUS1	HUS1 checkpoint clamp component	758.75	738.25	671.5	1022.25	816.25	600.25	535
ENSMGAG00000001204	LOC104912128	uncharacterized LOC104912128	102.5	107.5	92.25	65	91.25	50.25	63.25
ENSMGAG00000001206	ENSMGAG00000001206	Uncharacterized protein	4.25	5.25	3	0	0.25	0.5	0.25
ENSMGAG00000001207	HIPK3	homeodomain interacting protein kinase 3 [Source:HGNC Symbol;Acc:HGNC:4915]	958.25	990.25	811	796.25	791	624.25	761
ENSMGAG00000001208	TXNDC11	thioredoxin domain containing 11	872.5	946	886.75	1600.25	1155	1170.25	977.25
ENSMGAG00000001209	DNAJC11	DnaJ heat shock protein family (Hsp40) member C11 [Source:HGNC Symbol;Acc:HGNC:25570]	797.25	815	788.5	839	882.75	778	770.5
ENSMGAG00000001210	STC1	stanniocalcin 1	224	209.5	190.75	93.75	41.75	91.75	198.25
ENSMGAG00000001211	ZBTB44	zinc finger and BTB domain containing 44 [Source:HGNC Symbol;Acc:HGNC:25001]	543.75	537.75	478.25	503.25	529	520	507
ENSMGAG00000001214	LGR6	leucine rich repeat containing G protein-coupled receptor 6	107.5	87	71.5	503	295	377.25	233.5
ENSMGAG00000001215	CDC45	cell division cycle 45	222.75	157.5	178.25	54.25	45.25	38.5	30.5
ENSMGAG00000001216	DHX30	DExH-box helicase 30 [Source:HGNC Symbol;Acc:HGNC:16716]	1762.25	1917.75	1660	1682.5	1777.75	1352.75	1519
ENSMGAG00000001220	ENSMGAG00000001220	Tyrosine-protein phosphatase domain-containing protein	776.5	727	711.75	479.5	574.75	741.5	588.25
ENSMGAG00000001221	ADAMTS8	ADAM metallopeptidase with thrombospondin type 1 motif 8 [Source:HGNC Symbol;Acc:HGNC:224]	810.5	1496	1478.25	1406.5	1693.25	1190	813.25
ENSMGAG00000001222	NCLN	nicalin [Source:HGNC Symbol;Acc:HGNC:26923]	939.5	955	909	1159.75	1036.5	921.25	872.5
ENSMGAG00000001223	RNF20	ring finger protein 20 [Source:HGNC Symbol;Acc:HGNC:10062]	1308.25	1308	1247.5	1229.75	1217	1448.75	1242.5
ENSMGAG00000001224	AMBP	alpha-1-microglobulin/bikunin precursor	1	1.75	0.25	0	0.5	0.5	0
ENSMGAG00000001227	PCDH1	protocadherin 1	603.75	683.25	641.75	623.75	659.5	660.75	684
ENSMGAG00000001228	LUZP1	leucine zipper protein 1	407.25	427.5	396.25	489.75	423.75	354.25	394
ENSMGAG00000001229	ENSMGAG00000001229	Uncharacterized protein	146	169.75	134.75	112.25	131.75	63	96.25
ENSMGAG00000001230	AMMECR1L	AMMECR1 like	295.25	336	288.5	327.75	318.75	224.5	274
ENSMGAG00000001234	TRIM50	tripartite motif containing 50	1.75	1.5	0.25	2	2	1.5	2.25
ENSMGAG00000001235	EDA	ectodysplasin A [Source:HGNC Symbol;Acc:HGNC:3157]	266.5	267.5	255.75	159.25	232.75	199	200.5
ENSMGAG00000001236	KDM1A	lysine demethylase 1A	832.5	714.5	775	721.75	758.25	577.5	619.75
ENSMGAG00000001238	CBX1	chromobox 1	701.25	652.5	675	551.75	598.5	513.25	530.25
ENSMGAG00000001239	TNFRSF10B	tumor necrosis factor receptor superfamily, member 10b [Source:NCBI gene (formerly Entrezgene);Acc:664712]	346.25	300.5	282.25	186.75	203.25	152.25	154.5
ENSMGAG00000001240	PSMB4	proteasome 20S subunit beta 4	2557.25	2221.75	2393.5	2237.25	2463.75	2076.25	1970.5
ENSMGAG00000001243	LOC104912148	leucine-rich repeat-containing protein 32-like	0	0	0	0	0	0.25	0
ENSMGAG00000001244	LOC100538380	protein Wnt-11b-like	0.5	0.25	0.25	0	0.25	0	0
ENSMGAG00000001245	mettl2a	methyltransferase like 2A	652.25	596.75	593.25	681.25	594.25	696.5	534.25
ENSMGAG00000001246	ACAA2	acetyl-CoA acyltransferase 2 [Source:HGNC Symbol;Acc:HGNC:83]	1375.25	1442.75	1449.5	1402.25	1510.25	1463.25	1314.5
ENSMGAG00000001247	LOC100549331	myosin-7-like	0	0.25	0.75	0.25	1.75	0.25	0.5
ENSMGAG00000001248	POLR2D	RNA polymerase II subunit D	493.75	426.5	441	450.5	417.5	469.75	334
ENSMGAG00000001249	MND1	meiotic nuclear divisions 1 [Source:HGNC Symbol;Acc:HGNC:24839]	137.5	84.5	116.25	29.75	21.25	38.75	20.25
ENSMGAG00000001250	CGN	cingulin [Source:HGNC Symbol;Acc:HGNC:17429]	2357.25	2842.75	2256.25	2773.5	2576	2555.75	2668.75
ENSMGAG00000001251	PHF13	PHD finger protein 13 [Source:HGNC Symbol;Acc:HGNC:22983]	220	204.5	186	165.5	171.5	147.75	147.75
ENSMGAG00000001252	WDR33	WD repeat domain 33	1188.25	1174.75	1088.5	1429	1091.75	1136.75	1015
ENSMGAG00000001256	LOC100539445	tensin-3	1093.5	1371.75	1114	2500.5	1274.5	1779	1427.75
ENSMGAG00000001258	ENSMGAG00000001258	Uncharacterized protein	443.5	448.5	413	346.75	396	374.5	412.75
ENSMGAG00000001260	ENSMGAG00000001260	pseudogene	612	453.25	537	281	337.5	255	307.5
ENSMGAG00000001261	PCDH12	protocadherin 12	130.5	102	86.25	56.75	57	55.25	47.5
ENSMGAG00000001262	LITAF	lipopolysaccharide induced TNF factor	37	38	36.5	45	44.75	46.5	43.25
ENSMGAG00000001264	TLK2	tousled like kinase 2	850.5	964.25	816.25	1737.75	1016	1857	1320
ENSMGAG00000001265	GPR182	G protein-coupled receptor 182	4.5	5	4	2	2	3	3
ENSMGAG00000001266	KLHL21	kelch like family member 21	118.25	140	117.5	96.5	125	78.75	97.25
ENSMGAG00000001267	EXD3	exonuclease 3'-5' domain containing 3 [Source:HGNC Symbol;Acc:HGNC:26023]	460.5	456.5	449.75	297.5	341.75	344.75	376.25
ENSMGAG00000001268	NKX2-6	NK2 homeobox 6	0	0.25	0	0	1.25	0	0.5
ENSMGAG00000001269	NFE2L1	nuclear factor, erythroid 2 like 1	3328.25	3719.75	3245.25	3692	4486	3440.25	3867.5
ENSMGAG00000001270	ZC3H11A	zinc finger CCCH-type containing 11A	2120.5	2310.75	2066.75	2504	2354	2315	2273.75
ENSMGAG00000001271	TLR2	toll-like receptor 2 type-1	21	15.5	24	15.5	15.25	9.25	11.5
ENSMGAG00000001272	RLF	RLF zinc finger	762.25	664.5	679.5	659.5	614	719.25	684.5
ENSMGAG00000001273	USP42	ubiquitin specific peptidase 42	165.25	210.75	161.5	218.75	171.75	145.75	200.75
ENSMGAG00000001274	PRUNE2	prune homolog 2 with BCH domain [Source:HGNC Symbol;Acc:HGNC:25209]	540.25	958.75	841.5	865.5	1015.75	715.75	1235.75
ENSMGAG00000001275	ZBTB48	zinc finger and BTB domain containing 48 [Source:HGNC Symbol;Acc:HGNC:4930]	437.5	424.25	429.75	466.75	461.25	392.25	419.25
ENSMGAG00000001276	SLC25A37	solute carrier family 25 member 37	72	90.75	91.25	224.75	145.75	116.75	121.75
ENSMGAG00000001277	SLC23A1	solute carrier family 23 member 1	1235.5	1325	1002	624.25	753	690.25	955.25
ENSMGAG00000001279	TBC1D10A	TBC1 domain family member 10A	914.25	1013.25	885	887.75	1172.75	815.25	892.25
ENSMGAG00000001280	ZNRF1	Zinc and ring finger 1	209.5	247.75	208.75	179.5	208	189.75	191
ENSMGAG00000001281	IGBP1	immunoglobulin (CD79A) binding protein 1	532.5	454.25	457.5	425.5	441.5	465	409
ENSMGAG00000001282	ADAMTS15	ADAM metallopeptidase with thrombospondin type 1 motif 15 [Source:HGNC Symbol;Acc:HGNC:16305]	113.5	236	189.25	87.25	101.5	49.25	80.25
ENSMGAG00000001283	PPIB	peptidylprolyl isomerase B [Source:HGNC Symbol;Acc:HGNC:9255]	8311.5	7280.25	7444.75	7849.75	8485.75	5026.5	6032
ENSMGAG00000001284	NOXA1	NADPH oxidase activator 1	1169.25	1304.75	1217	1102.75	1974.5	1199.5	1350.25
ENSMGAG00000001285	SFRP2	secreted frizzled related protein 2 [Source:HGNC Symbol;Acc:HGNC:10777]	400.5	323	467.5	172.75	198.75	166.75	153
ENSMGAG00000001287	PTGS2	prostaglandin-endoperoxide synthase 2 [Source:HGNC Symbol;Acc:HGNC:9605]	289	300	253.5	329	410.5	145.75	345
ENSMGAG00000001288	TUFT1	tuftelin 1	703.75	790.5	713.75	841.75	836.5	717.75	655
ENSMGAG00000001289	SNX1	sorting nexin 1 [Source:HGNC Symbol;Acc:HGNC:11172]	2539	2222.5	2255	2335.5	2201.25	2262.75	2052.5
ENSMGAG00000001290	WDR59	WD repeat domain 59	379.25	394.5	337.75	345.5	356	273.25	344.25
ENSMGAG00000001291	ENSMGAG00000001291	pseudogene	208.75	223.25	178	169.25	187.75	114.75	154.5
ENSMGAG00000001293	ENTPD4	ectonucleoside triphosphate diphosphohydrolase 4	661.75	637	551.25	533.25	504.25	509.25	547
ENSMGAG00000001295	AGAP3	ArfGAP with GTPase domain, ankyrin repeat and PH domain 3 [Source:HGNC Symbol;Acc:HGNC:16923]	466.25	457.75	455	371	530.25	270.25	381.75
ENSMGAG00000001296	LOC100540643	diacylglycerol O-acyltransferase 2-like	0.5	0.5	1.25	2.25	2.5	0.5	0.25
ENSMGAG00000001297	NELFE	Negative elongation factor E	872.75	834.5	750.25	656.25	749.75	571.75	747.25
ENSMGAG00000001298	TAS1R1	taste 1 receptor member 1 [Source:HGNC Symbol;Acc:HGNC:14448]	152.75	153.75	153	90.25	129.25	80.75	123.5
ENSMGAG00000001299	PLA2G4A	phospholipase A2 group IVA [Source:HGNC Symbol;Acc:HGNC:9035]	1400.5	1190.25	1092	827.5	1079.5	633.75	939.5
ENSMGAG00000001300	LOC100548709	LIM and senescent cell antigen-like-containing domain protein 2	673.25	937.75	945.5	537.75	719.75	490.5	680.5
ENSMGAG00000001302	TCP11L1	t-complex 11 like 1 [Source:HGNC Symbol;Acc:HGNC:25655]	594	596.5	530	833.25	1023.5	414	872.75
ENSMGAG00000001303	ENSMGAG00000001303	Uncharacterized protein	4	1.5	4	0.25	1.75	0.25	0
ENSMGAG00000001305	LOC100541931	protein kinase C delta type-like	650.25	617.25	657.5	795.5	567.25	992.5	703.25
ENSMGAG00000001306	ECD	ecdysoneless cell cycle regulator	654.5	648	621	719.25	652.25	689.5	530
ENSMGAG00000001307	FA2H	Fatty acid 2-hydroxylase (EC 1.-.-.-)	141.25	140.5	145.75	42.75	115.5	54.75	87.75
ENSMGAG00000001308	PIP5K1C	phosphatidylinositol-4-phosphate 5-kinase type 1 gamma [Source:HGNC Symbol;Acc:HGNC:8996]	547.75	602.75	510.25	536.5	597.75	483.5	531.25
ENSMGAG00000001309	PATL2	PAT1 homolog 2 [Source:HGNC Symbol;Acc:HGNC:33630]	100	69.25	87.25	32.75	30.25	46	57.75
ENSMGAG00000001310	DNAJC18	DnaJ heat shock protein family (Hsp40) member C18	522.75	488.25	450.5	591.5	426	626.5	483.75
ENSMGAG00000001311	PLRG1	pleiotropic regulator 1 [Source:HGNC Symbol;Acc:HGNC:9089]	764.25	737.5	767.75	812.75	745.75	694.5	651
ENSMGAG00000001314	LOXL2	lysyl oxidase like 2	271.75	352	321.5	172.5	192.75	69.75	225.25
ENSMGAG00000001315	TNFRSF25	TNF receptor superfamily member 25 [Source:HGNC Symbol;Acc:HGNC:11910]	182.75	218	198.5	113.75	197.5	95.5	161.25
ENSMGAG00000001316	MRC2	mannose receptor C type 2 [Source:HGNC Symbol;Acc:HGNC:16875]	1778.75	2017.5	1910.5	2256	3219.25	2897	2744
ENSMGAG00000001317	LIPG	lipase G, endothelial type [Source:HGNC Symbol;Acc:HGNC:6623]	435.25	454.25	488.25	304.5	730.5	385.5	419.25
ENSMGAG00000001318	MLKL	mixed lineage kinase domain like pseudokinase	7.5	8	7.25	6.5	8.75	6.75	6.25
ENSMGAG00000001319	LOC100544620	septin-2	5261	4584	4841.75	4510	4887.25	4833	4235
ENSMGAG00000001321	PAIP2	poly(A) binding protein interacting protein 2	868.75	834.75	819.25	1163.5	1105.75	1038.5	909
ENSMGAG00000001322	EIF2AK1	eukaryotic translation initiation factor 2 alpha kinase 1	653.75	625.25	648.5	644	566.25	594.25	481.25
ENSMGAG00000001323	SNX27	sorting nexin family member 27	997.75	936.5	920.5	997	952.5	1039.75	900
ENSMGAG00000001327	FAM149B1	family with sequence similarity 149 member B1	277.25	300.75	306.5	348.25	311	206.75	280.75
ENSMGAG00000001328	ENSMGAG00000001328	pseudogene	77	94.25	83	53.25	42.5	27.5	34.25
ENSMGAG00000001329	RALGAPB	Ral GTPase activating protein non-catalytic subunit beta	1263.25	1416.75	1229.25	1518.25	1531.75	1176.5	1296
ENSMGAG00000001330	SF3A1	splicing factor 3a subunit 1 [Source:HGNC Symbol;Acc:HGNC:10765]	2729.5	2584	2640.5	2665	2761.75	2787.75	2573.5
ENSMGAG00000001331	MATR3	matrin 3	6723.25	6210	6009.75	6862.75	5743	6759.75	5786
ENSMGAG00000001332	DEPDC7	DEP domain containing 7 [Source:HGNC Symbol;Acc:HGNC:29899]	221	184	177.5	975.75	1053.5	80.25	652.25
ENSMGAG00000001333	LOC100546469	ectonucleoside triphosphate diphosphohydrolase 8	480.25	685.25	588.5	1830.5	2669.25	1724	2719.5
ENSMGAG00000001335	PDIA4	protein disulfide isomerase family A member 4 [Source:HGNC Symbol;Acc:HGNC:30167]	5036.75	5149.25	4931	8822.25	7309	8006.75	6780.75
ENSMGAG00000001336	ENSMGAG00000001336	pseudogene	3652	4053.25	3271.75	2280	3983.5	1786	3213
ENSMGAG00000001337	MYO7B	myosin VIIB	346.75	503	422.5	111.25	251.25	136.5	275.25
ENSMGAG00000001339	SMARCC1	SWI/SNF related, matrix associated, actin dependent regulator of chromatin subfamily c member 1 [Source:HGNC Symbol;Acc:HGNC:11104]	2321.5	2476	2319.75	2474.25	2488.75	1832.5	2312.75
ENSMGAG00000001340	BRINP3	BMP/retinoic acid inducible neural specific 3 [Source:HGNC Symbol;Acc:HGNC:22393]	7.25	6.25	11.25	0.25	1.75	0.25	1.25
ENSMGAG00000001342	LOC100543589	60S ribosomal protein L17	7484.25	6147.75	6672.5	6361.25	5904.5	5769	4558.25
ENSMGAG00000001343	UBE2D1	ubiquitin conjugating enzyme E2 D1	3084	2557.5	2731.5	2625.75	2599.25	2696.5	2198.5
ENSMGAG00000001344	HYDIN	HYDIN, axonemal central pair apparatus protein	7024.5	7268.5	5923	3977	4147.5	4465.75	6004.5
ENSMGAG00000001345	BTM	beta-2-microglobulin [Source:NCBI gene;Acc:414830] ortholog	4768.75	3667.25	3886.75	2535.75	2551.25	3034.25	3102
ENSMGAG00000001346	SNX19	sorting nexin 19	523.5	587.5	535.75	519.25	505.25	462.25	451
ENSMGAG00000001347	C18orf32	chromosome 18 open reading frame 32 [Source:HGNC Symbol;Acc:HGNC:31690]	723.5	748	730.75	893.5	896	830.75	698
ENSMGAG00000001348	ACOT7	acyl-CoA thioesterase 7 [Source:HGNC Symbol;Acc:HGNC:24157]	1034.25	923.25	906.25	756	999	753.25	782.75
ENSMGAG00000001349	WASF2	Wiskott-Aldrich syndrome protein family member (WASP family protein member)	604.75	641.75	601.5	574	635	430.5	553
ENSMGAG00000001350	TERB2	telomere repeat binding bouquet formation protein 2 [Source:HGNC Symbol;Acc:HGNC:28520]	14143.5	11222.2	11930.2	8218.75	7562.5	15466.8	9847.5
ENSMGAG00000001351	SMAD2	SMAD family member 2 [Source:HGNC Symbol;Acc:HGNC:6768]	1205.5	1392.25	1248.5	1909	1299.25	1343.5	1100.75
ENSMGAG00000001352	FGB	fibrinogen beta chain [Source:HGNC Symbol;Acc:HGNC:3662]	2	10	7	180.25	20.25	9.5	5.25
ENSMGAG00000001353	CACTIN	cactin, spliceosome C complex subunit [Source:HGNC Symbol;Acc:HGNC:29938]	1460.75	1464	1363.5	1302.75	1399	1138	1218.25
ENSMGAG00000001355	KMO	kynurenine 3-monooxygenase	817	836.75	668.25	368.5	504	444	706
ENSMGAG00000001356	R3HCC1	R3H domain and coiled-coil containing 1	1002.5	1001.75	994.75	782.5	905.75	846	822.75
ENSMGAG00000001357	CCDC157	Coiled-coil domain containing 157	581.75	630.25	518.25	289.5	294.25	363.75	376.25
ENSMGAG00000001358	SIL1	SIL1 nucleotide exchange factor	411.5	408	403.25	585	570	647	580.75
ENSMGAG00000001359	RPS17	ribosomal protein S17 [Source:HGNC Symbol;Acc:HGNC:10397]	7569.25	6070.75	6683	5201.75	5515.75	4726.75	4091
ENSMGAG00000001360	ANXA11	Annexin	6034.75	6130.5	5657.75	5372	5760.25	6742	5606.25
ENSMGAG00000001361	QSER1	glutamine and serine rich 1 [Source:HGNC Symbol;Acc:HGNC:26154]	1008.5	1086	978.25	1158	1072	913.75	1028.5
ENSMGAG00000001362	HMG20B	high mobility group 20B [Source:HGNC Symbol;Acc:HGNC:5002]	819.75	881	748.5	779	793.75	531.75	626
ENSMGAG00000001364	GPR153	G protein-coupled receptor 153 [Source:HGNC Symbol;Acc:HGNC:23618]	23.75	20.25	23.5	11.25	19	16.75	20.25
ENSMGAG00000001365	NDRG3	NDRG family member 3	974.25	997.25	872.5	758	922.5	613.5	771
ENSMGAG00000001366	ZBTB7C	zinc finger and BTB domain containing 7C [Source:HGNC Symbol;Acc:HGNC:31700]	1024.25	1115.75	978.75	862.75	949.75	639.75	759
ENSMGAG00000001367	NTM	neurotrimin [Source:HGNC Symbol;Acc:HGNC:17941]	610.25	419	508.5	79	128.75	162.5	163.25
ENSMGAG00000001368	CTNNA1	catenin alpha 1	5061.75	4885.5	4879	3805.25	4209	3820.75	4008
ENSMGAG00000001369	LOC100541523	6-phosphofructo-2-kinase/fructose-2,6-bisphosphatase 4	700.25	713	682.5	574.25	724.75	605.75	728.5
ENSMGAG00000001370	EZH2	enhancer of zeste 2 polycomb repressive complex 2 subunit [Source:HGNC Symbol;Acc:HGNC:3527]	792.5	640.75	716.75	465.25	484.25	461.25	400
ENSMGAG00000001371	MFSD12	major facilitator superfamily domain containing 12 [Source:HGNC Symbol;Acc:HGNC:28299]	119.25	156.25	140	126.75	185.5	119.5	132
ENSMGAG00000001372	GNB1L	G protein subunit beta 1 like	527.75	513	431.5	276.25	286.75	299.25	331.5
ENSMGAG00000001373	RNF2	ring finger protein 2	96	66	87	63.25	62.5	71.25	73.25
ENSMGAG00000001374	KLHL12	Kelch like family member 12	381.5	387.5	356	298.75	345.5	255.25	302.25
ENSMGAG00000001375	CHMP7	charged multivesicular body protein 7	1548.75	1586.75	1527.5	1482.75	1560.75	1383.25	1348.75
ENSMGAG00000001376	RNF215	ring finger protein 215 [Source:HGNC Symbol;Acc:HGNC:33434]	281.5	330.75	287.75	348	336	300.25	290.25
ENSMGAG00000001380	LOC100548827	tubulin alpha-8 chain	1042.5	766.75	983	544.75	461.5	631.25	387.25
ENSMGAG00000001383	CSTF3	cleavage stimulation factor subunit 3 [Source:HGNC Symbol;Acc:HGNC:2485]	1008.25	914.75	883.5	868	873.75	875.5	747.75
ENSMGAG00000001384	PIAS2	Protein inhibitor of activated STAT 2	184	165	160.75	171.75	164.75	128.25	162.25
ENSMGAG00000001385	ARR3	arrestin 3 [Source:HGNC Symbol;Acc:HGNC:710]	36	29	27	15.25	24.5	12.75	19
ENSMGAG00000001386	ENSMGAG00000001386	GRAM domain-containing protein	504	570.25	492.5	278.25	447.75	336.25	404.25
ENSMGAG00000001387	CPEB1	cytoplasmic polyadenylation element binding protein 1	358.75	400.5	357.25	260	326	263.25	310
ENSMGAG00000001388	RHOBTB2	Rho related BTB domain containing 2	535.25	514.25	475	285.25	582.25	241	431.5
ENSMGAG00000001389	ENSMGAG00000001389	pseudogene	670.5	828.25	563.5	425.75	693.75	270	562
ENSMGAG00000001391	FGA	fibrinogen alpha chain	0	0	0	0.5	0	0.25	0
ENSMGAG00000001392	NIBAN1	Niban apoptosis regulator 1	1988.75	2319.25	2106.75	2645.5	2419.25	2056.75	2174.25
ENSMGAG00000001393	KDM5B	lysine demethylase 5B	1906.5	1752.25	1744.75	1387	1472.25	1388.25	1424.5
ENSMGAG00000001394	TXNRD2	thioredoxin reductase 2	371.5	339	343.25	387.5	314	290.25	298.75
ENSMGAG00000001395	FZR1	fizzy and cell division cycle 20 related 1 [Source:HGNC Symbol;Acc:HGNC:24824]	804.25	796.25	749	689.75	745.75	607.75	689
ENSMGAG00000001396	RNF207	ring finger protein 207 [Source:HGNC Symbol;Acc:HGNC:32947]	67	73.75	60.5	41.25	57	38	53.5
ENSMGAG00000001397	ANKRD61	ankyrin repeat domain 61 [Source:HGNC Symbol;Acc:HGNC:22467]	0	0	0	0	0	0	0
ENSMGAG00000001399	AIMP2	aminoacyl tRNA synthetase complex interacting multifunctional protein 2	795.25	703	785	757	744.75	751.25	528.75
ENSMGAG00000001400	HEXB	Beta-N-acetylhexosaminidase (EC 3.2.1.52)	513.5	482	486	1459	565	580	541.5
ENSMGAG00000001401	SIGLEC15	sialic acid binding Ig like lectin 15 [Source:HGNC Symbol;Acc:HGNC:27596]	0	0.5	0	0.5	0.25	0	1.25
ENSMGAG00000001402	FGG	fibrinogen gamma chain [Source:HGNC Symbol;Acc:HGNC:3694]	2	6.25	2.5	4.75	6	7.75	3.25
ENSMGAG00000001404	ENSMGAG00000001404	pseudogene	146.25	257.75	250.25	101.25	155	73.25	129
ENSMGAG00000001405	RNF165	ring finger protein 165 [Source:HGNC Symbol;Acc:HGNC:31696]	27.75	34.75	32.5	14	19.5	11	24
ENSMGAG00000001406	LOC100545547	WD and tetratricopeptide repeats protein 1	885.25	984.5	966.5	880.5	1096	894.75	907.25
ENSMGAG00000001410	PMS2	PMS1 homolog 2, mismatch repair system component	402	364.75	407.25	432.5	373.75	414.75	342.25
ENSMGAG00000001413	CISD1	CDGSH iron sulfur domain 1	2093	2345.75	2136.75	2441	2643.25	2481.5	2299.75
ENSMGAG00000001416	KCNAB2	potassium voltage-gated channel subfamily A regulatory beta subunit 2 [Source:HGNC Symbol;Acc:HGNC:6229]	205.75	200.5	177.25	139.75	199	132.25	137.5
ENSMGAG00000001417	PRRG4	proline rich and Gla domain 4 [Source:HGNC Symbol;Acc:HGNC:30799]	151.25	154.5	139	182.25	150.25	158	131
ENSMGAG00000001418	SLC25A39	solute carrier family 25 member 39 [Source:HGNC Symbol;Acc:HGNC:24279]	818	813.75	828.25	695.75	933.75	506.5	647
ENSMGAG00000001420	HYAL1	hyaluronidase 1	615	713.25	684.25	598.5	856.25	698	861
ENSMGAG00000001422	IPMK	inositol polyphosphate multikinase [Source:HGNC Symbol;Acc:HGNC:20739]	315.5	323.5	305.25	377.25	434.75	322	371
ENSMGAG00000001424	HYAL2	hyaluronoglucosaminidase 2	554.5	541.25	574.25	315.75	478.5	260	355
ENSMGAG00000001425	SLC9A1	solute carrier family 9 member A1	3636.5	3371.5	3119.25	1677.75	2857.5	2146.5	2828.25
ENSMGAG00000001426	XPO7	exportin 7 [Source:HGNC Symbol;Acc:HGNC:14108]	2648.25	2606.25	2320.75	2315.5	2463.75	2113.75	2198.5
ENSMGAG00000001427	OPCML	opioid binding protein/cell adhesion molecule like [Source:HGNC Symbol;Acc:HGNC:8143]	8	5.5	8.5	0.25	1	0.5	2.25
ENSMGAG00000001428	GLG1	golgi glycoprotein 1	4480	4586.75	4319.25	4431	5233	2823.25	4480.75
ENSMGAG00000001429	COMT	catechol-O-methyltransferase	241	207	216.5	230.5	162.5	220.5	167.75
ENSMGAG00000001430	ENSMGAG00000001430	Uncharacterized protein	6.5	16.75	15.75	10	21	10.5	7.75
ENSMGAG00000001433	DIP2A	disco interacting protein 2 homolog A	1367.25	1593.25	1337.25	1455.75	1257.25	1336	1266.75
ENSMGAG00000001435	arvcf	ARVCF delta catenin family member	700.75	624.5	599	537.5	621	422.75	512.5
ENSMGAG00000001436	CUL1	cullin 1 [Source:HGNC Symbol;Acc:HGNC:2551]	1784.5	1844.25	1745.5	2000.5	1942.25	2160.5	1812.25
ENSMGAG00000001437	CCDC73	coiled-coil domain containing 73 [Source:HGNC Symbol;Acc:HGNC:23261]	33.75	42.75	36.75	30.75	14.75	32	26.75
ENSMGAG00000001438	HSPA9	heat shock protein family A (Hsp70) member 9	4682	4452.75	4589.25	5189.25	5514.25	4898.5	4180.75
ENSMGAG00000001439	PAN2	poly(A) specific ribonuclease subunit PAN2	1075.5	1153.25	1048.25	990.25	982	900.75	957.75
ENSMGAG00000001442	ENSMGAG00000001442	Uncharacterized protein	50.75	32.75	42.75	19.75	14.25	71	33.75
ENSMGAG00000001444	CCZ1	CCZ1 homolog, vacuolar protein trafficking and biogenesis associated	910.5	879.25	870.25	1075.25	973.25	951.5	847
ENSMGAG00000001445	LOC100549138	importin-9	1037.75	987	1001.5	894	990.5	879.25	810.75
ENSMGAG00000001446	C10H1orf21	chromosome 10 open reading frame, human C1orf21	150.5	129.5	134.25	106.5	149.75	212.25	160.75
ENSMGAG00000001448	SLA2	Src like adaptor 2	61.75	63.25	49.5	48	64.5	29.75	47
ENSMGAG00000001449	NR2E3	nuclear receptor subfamily 2 group E member 3	1.5	3.25	2.75	0	0	0	2.25
ENSMGAG00000001451	LOC100547435	ectonucleoside triphosphate diphosphohydrolase 8-like	1239	1282	1236.75	1363.25	1733.25	1321.25	1761.75
ENSMGAG00000001453	EIF3M	eukaryotic translation initiation factor 3 subunit M [Source:HGNC Symbol;Acc:HGNC:24460]	2633.25	2137.5	2316.75	1878.25	1730.5	2182.5	1636.5
ENSMGAG00000001454	TANC2	Tetratricopeptide repeat, ankyrin repeat and coiled-coil containing 2	227.75	237.5	199.5	252	133.25	140	149.5
ENSMGAG00000001455	PHF20	PHD finger protein 20 [Source:HGNC Symbol;Acc:HGNC:16098]	1516.75	1490.25	1404.5	1492.5	1500.5	1495.25	1382
ENSMGAG00000001456	PDPR	pyruvate dehydrogenase phosphatase regulatory subunit	384.75	478	374	462	504.5	299	393.25
ENSMGAG00000001457	RBM46	RNA binding motif protein 46 [Source:HGNC Symbol;Acc:HGNC:28401]	10	4.25	6.25	3.25	3	2.5	0.5
ENSMGAG00000001458	RAB41	RAB41, member RAS oncogene family	575.75	624.5	639.25	726.75	694	586.5	614
ENSMGAG00000001459	ZMYND10	zinc finger MYND-type containing 10 [Source:HGNC Symbol;Acc:HGNC:19412]	2396.5	2160.25	1809.75	1008.25	1268.75	1278	1375
ENSMGAG00000001460	TSEN15	tRNA splicing endonuclease subunit 15	50	57.75	54	56.75	60.5	50.25	41.5
ENSMGAG00000001461	PCDH15	protocadherin related 15 [Source:HGNC Symbol;Acc:HGNC:14674]	5.25	2.5	4.5	4	3	11.75	7.25
ENSMGAG00000001463	LRAT	lecithin retinol acyltransferase [Source:HGNC Symbol;Acc:HGNC:6685]	1.75	2.5	1.75	0.5	2.75	2.25	0.75
ENSMGAG00000001464	colgalt2	collagen beta(1-O)galactosyltransferase 2	206.75	285.5	241	200	423.25	193.5	353
ENSMGAG00000001465	ELP6	elongator acetyltransferase complex subunit 6 [Source:HGNC Symbol;Acc:HGNC:25976]	629.5	715.25	682.25	629.5	578.25	657.5	649.75
ENSMGAG00000001466	NPRL2	NPR2-like, GATOR1 complex subunit	574	637	601.5	677	622.75	422.75	536
ENSMGAG00000001467	LOC104914649	putative nuclease HARBI1	314	260	272.25	158.25	212	162.75	168.5
ENSMGAG00000001468	DOHH	deoxyhypusine hydroxylase [Source:HGNC Symbol;Acc:HGNC:28662]	886	867.5	865.5	647.25	852.75	495.5	583.5
ENSMGAG00000001470	LOC100541254	PCTP-like protein	64.75	82.5	73	79	52.75	81.25	68
ENSMGAG00000001471	CDC25A	cell division cycle 25A	200.75	171.75	186.25	152	132.25	116.5	112.5
ENSMGAG00000001473	MYO9A	myosin IXA [Source:HGNC Symbol;Acc:HGNC:7608]	1165	1085.75	974.5	1049.25	869.25	619.5	786
ENSMGAG00000001474	ETF1	eukaryotic translation termination factor 1	672.75	633.75	639.5	809.25	694.25	645	543.25
ENSMGAG00000001475	GUCY1A1	guanylate cyclase 1 soluble subunit alpha 1 [Source:HGNC Symbol;Acc:HGNC:4685]	948	856.25	928.25	1368.5	1319	711.75	1094.5
ENSMGAG00000001476	IWS1	interacts with SUPT6H, CTD assembly factor 1	1659	1586.5	1554.5	1686.25	1514.5	1777.5	1436.25
ENSMGAG00000001477	ASAP3	ArfGAP with SH3 domain, ankyrin repeat and PH domain 3	1536.25	1609.75	1464.25	756.25	1537.5	670.25	1240
ENSMGAG00000001479	TANGO2	transport and golgi organization 2 homolog	716.5	653	637.75	760.25	524.5	719	524.5
ENSMGAG00000001480	CS	citrate synthase	2989.75	2870	2878.75	2482	2864.75	1635.5	1814.5
ENSMGAG00000001483	IGSF9B	immunoglobulin superfamily member 9B [Source:HGNC Symbol;Acc:HGNC:32326]	3.75	4.25	5.5	4.25	5	2.25	3.75
ENSMGAG00000001484	PDZD11	PDZ domain containing 11	448	461.75	434.5	349.5	403	381	340.5
ENSMGAG00000001486	ENSMGAG00000001486	Uncharacterized protein	1025.5	1011.25	938	758.25	951	586.5	836.25
ENSMGAG00000001487	PRKG1	protein kinase cGMP-dependent 1 [Source:HGNC Symbol;Acc:HGNC:9414]	903.75	1192.25	1141.5	918.25	1059.25	959.25	1248.5
ENSMGAG00000001488	ATCAY	ATCAY, caytaxin	2.75	4.5	3.5	1	1.75	2.25	2.25
ENSMGAG00000001489	WT1	WT1 transcription factor [Source:HGNC Symbol;Acc:HGNC:12796]	133	124.75	139.5	124.25	130.25	114.25	111.25
ENSMGAG00000001490	ST3GAL2	ST3 beta-galactoside alpha-2,3-sialyltransferase 2	693.5	804.75	810.75	452.5	537.25	400.25	487
ENSMGAG00000001493	LZTR1	leucine zipper like transcription regulator 1	591	655	582.25	587	603	501.5	529.5
ENSMGAG00000001494	LOC104909482	uncharacterized LOC104909482	53.5	59.5	45.25	52.75	53	47.25	45.5
ENSMGAG00000001495	NPHP4	nephrocystin 4 [Source:HGNC Symbol;Acc:HGNC:19104]	959.5	941.75	833.75	665.25	669.25	551.5	660
ENSMGAG00000001496	LOC104909481	exportin-1	1256	1067.75	1143.25	962.75	1076	1051.5	1023
ENSMGAG00000001498	GUCY1B1	guanylate cyclase 1 soluble subunit beta 1 [Source:HGNC Symbol;Acc:HGNC:4687]	1732.75	1767.75	1762.75	1804.75	2616.25	1173.25	1981.5
ENSMGAG00000001499	TMEM115	transmembrane protein 115	753.75	740.25	674.5	605	875.75	420.25	534.5
ENSMGAG00000001500	JAM3	junctional adhesion molecule 3 [Source:HGNC Symbol;Acc:HGNC:15532]	677.75	966.75	971.25	602	756	567.5	767.5
ENSMGAG00000001501	KIF4A	kinesin family member 4A	769.5	467.25	567	123.5	76.25	164.75	91.25
ENSMGAG00000001502	RBM12	RNA binding motif protein 12 [Source:HGNC Symbol;Acc:HGNC:9898]	959.25	919	850.25	969	851.75	838.75	827
ENSMGAG00000001504	ENSMGAG00000001504	Uncharacterized protein	1096.75	991.5	1138	701	602.25	407.25	469.75
ENSMGAG00000001505	COQ10A	coenzyme Q-binding protein COQ10 homolog A, mitochondrial	286	273.25	256.25	307.5	348.75	175.75	272.75
ENSMGAG00000001506	LOC100545341	parvalbumin, thymic	0	0	0	0	0	0	0
ENSMGAG00000001507	A1CF	APOBEC1 complementation factor [Source:HGNC Symbol;Acc:HGNC:24086]	0	0	0	0	0	0	0
ENSMGAG00000001509	RBM39	RNA binding motif protein 39 [Source:HGNC Symbol;Acc:HGNC:15923]	2425	2421	2230	2524	2283.25	2121.5	2098.5
ENSMGAG00000001510	ARPC5	actin related protein 2/3 complex subunit 5 [Source:HGNC Symbol;Acc:HGNC:708]	1958.5	1644.75	1857.75	1347.75	1385	1371.25	1145.5
ENSMGAG00000001511	FBXW11	F-box and WD repeat domain containing 11	743.5	776	734.25	855.5	777.75	757	689.25
ENSMGAG00000001513	CACNA2D2	calcium voltage-gated channel auxiliary subunit alpha2delta 2 [Source:HGNC Symbol;Acc:HGNC:1400]	658.25	753.5	842	391.5	564.75	274.25	563.25
ENSMGAG00000001514	LOC100546662	vitamin K-dependent protein C-like	34.25	23.5	30.75	17.5	10.75	14.75	4.5
ENSMGAG00000001515	PSTPIP2	proline-serine-threonine phosphatase interacting protein 2 [Source:HGNC Symbol;Acc:HGNC:9581]	8	8.25	5.75	6.5	5.75	5.75	2.75
ENSMGAG00000001516	RGL1	ral guanine nucleotide dissociation stimulator like 1 [Source:HGNC Symbol;Acc:HGNC:30281]	274	279.25	281.75	255	256.5	243	320
ENSMGAG00000001517	TRMT2A	tRNA methyltransferase 2 homolog A	884.75	731.5	756.5	880	750.5	856.75	734.5
ENSMGAG00000001518	LOC100540641	neutral ceramidase	17.5	14	15.5	10.5	8.5	7.25	9.75
ENSMGAG00000001520	RNPEP	Arginyl aminopeptidase	398.5	343	372.25	244.25	295.25	249	284.5
ENSMGAG00000001521	CYB561	Cytochrome b-561 (Cytochrome b561) (Transmembrane ascorbate-dependent reductase CYB561)	657.25	946.5	752.5	928.5	1353	943.25	930.75
ENSMGAG00000001522	ANKRD52	ankyrin repeat domain 52	419.5	508.5	433.5	438	458.5	301.75	404
ENSMGAG00000001523	LMTK2	lemur tyrosine kinase 2	1170.75	1152.25	1099.75	1618.5	1205	1250.5	1069.5
ENSMGAG00000001524	NCAPD3	non-SMC condensin II complex subunit D3 [Source:HGNC Symbol;Acc:HGNC:28952]	235.75	142.5	184.75	96	68	58.5	61.5
ENSMGAG00000001526	NMRK2	nicotinamide riboside kinase 2	305.75	207	240.75	82.5	65	75.75	63.5
ENSMGAG00000001527	ENSMGAG00000001527	Uncharacterized protein	1551	1736.75	1559.25	1822	1587.5	1636.75	1561
ENSMGAG00000001529	FCSK	Fucose kinase	460.25	492.5	406.25	444.25	449.5	262.5	372
ENSMGAG00000001530	ACE	angiotensin I converting enzyme	36.75	67.5	59.25	58.5	39.75	34	36.25
ENSMGAG00000001531	NCF2	neutrophil cytosolic factor 2	48.25	33.75	43.5	37.25	25.75	38.25	39.75
ENSMGAG00000001532	EPG5	ectopic P-granules autophagy protein 5 homolog [Source:HGNC Symbol;Acc:HGNC:29331]	459.25	504	463.75	546.75	506.5	498.75	491.25
ENSMGAG00000001533	PAX6	paired box 6	0	0	0	0	0.75	0	0
ENSMGAG00000001534	DGCR8	DGCR8 microprocessor complex subunit	579.5	660.75	553	736.75	584.5	487	562.25
ENSMGAG00000001535	LOC100547499	digestive cysteine proteinase 1-like	139.25	115.25	111.25	38.5	40.75	27.25	34.5
ENSMGAG00000001536	ASIC5	acid sensing ion channel subunit family member 5 [Source:HGNC Symbol;Acc:HGNC:17537]	0	0	0	0	0	0	0
ENSMGAG00000001538	RAMP3	receptor activity modifying protein 3	39	34.5	28.25	18	17	19.75	19.5
ENSMGAG00000001540	TECPR1	tectonin beta-propeller repeat containing 1 [Source:HGNC Symbol;Acc:HGNC:22214]	687.75	675	710.75	657.5	597.75	1186.75	851
ENSMGAG00000001541	S100B	S100 calcium binding protein B [Source:HGNC Symbol;Acc:HGNC:10500]	60	38.75	40.75	15.5	17	28.75	26
ENSMGAG00000001543	NAV1	neuron navigator 1	577.5	684.75	592.5	297.25	520.5	206.25	407.25
ENSMGAG00000001544	LSS	lanosterol synthase (2,3-oxidosqualene-lanosterol cyclase)	983.75	1264.5	1091.5	1293	1338.25	935.5	953.25
ENSMGAG00000001545	SGMS1	sphingomyelin synthase 1	1429.75	1392.75	1326.25	1039	1246.75	998.25	1205
ENSMGAG00000001546	CNTNAP2	contactin associated protein 2 [Source:HGNC Symbol;Acc:HGNC:13830]	129.75	139	121	98.75	126.75	104.5	123.25
ENSMGAG00000001547	DUS3L	dihydrouridine synthase 3 like	360.5	337.5	308.5	321.75	340.25	283.75	310.75
ENSMGAG00000001548	ENSMGAG00000001548	Uncharacterized protein	44	24.5	53.75	7.75	26.25	13	8
ENSMGAG00000001549	DGKD	diacylglycerol kinase delta [Source:HGNC Symbol;Acc:HGNC:2851]	528.75	652.25	529.75	543	596.75	438.5	628
ENSMGAG00000001550	TCEA3	transcription elongation factor A3	483.25	483.75	437.75	220.25	387.75	437.25	384.25
ENSMGAG00000001552	RANBP1	RAN binding protein 1	1143	983.75	1013.75	1080.75	1003.25	1158.25	871
ENSMGAG00000001554	NDOR1	NADPH dependent diflavin oxidoreductase 1	653.75	688.5	603.75	694.75	740.5	546.5	593.5
ENSMGAG00000001555	TDO2	tryptophan 2,3-dioxygenase [Source:HGNC Symbol;Acc:HGNC:11708]	4.5	5	3.5	6.75	4	1.75	0.5
ENSMGAG00000001556	NFS1	NFS1 cysteine desulfurase [Source:HGNC Symbol;Acc:HGNC:15910]	290.5	326.75	282.25	339.75	356.5	309.5	299.25
ENSMGAG00000001557	AJAP1	adherens junctions associated protein 1 [Source:HGNC Symbol;Acc:HGNC:30801]	11	15.5	11.25	11.75	16.75	6.25	10
ENSMGAG00000001559	HAUS1	HAUS augmin like complex subunit 1 [Source:HGNC Symbol;Acc:HGNC:25174]	131.5	54	103.25	20.75	11.25	21	15.75
ENSMGAG00000001560	TPK1	thiamin pyrophosphokinase 1 [Source:HGNC Symbol;Acc:HGNC:17358]	130.5	111	122.75	169.25	159.25	216.5	158.25
ENSMGAG00000001561	SMG7	SMG7 nonsense mediated mRNA decay factor [Source:HGNC Symbol;Acc:HGNC:16792]	1437.25	1438.25	1319.5	1478.75	1441	1357.75	1359.25
ENSMGAG00000001562	TP73	tumor protein p73 [Source:HGNC Symbol;Acc:HGNC:12003]	1084.5	991.5	855.25	553	708.25	715.75	874.5
ENSMGAG00000001563	LOC100544684	la-related protein 6-like	8.75	6.25	5.5	2	3.5	2.75	2
ENSMGAG00000001565	ZDHHC8	zinc finger DHHC-type containing 8	311.75	379.5	324	207.5	249	195.75	281
ENSMGAG00000001566	KCNH2	potassium voltage-gated channel subfamily H member 2 [Source:HGNC Symbol;Acc:HGNC:6251]	700.5	810.75	874.75	429	618	324	482.75
ENSMGAG00000001567	ATAD1	ATPase family AAA domain containing 1 [Source:HGNC Symbol;Acc:HGNC:25903]	2160.5	1938.25	1982.5	1782.75	1970.25	2157.25	1918.5
ENSMGAG00000001569	ENSMGAG00000001569	Aha1_N domain-containing protein	1105.5	946.5	977	1091.25	861.5	958.75	877.25
ENSMGAG00000001571	BAIAP2L1	BAR/IMD domain containing adaptor protein 2 like 1	2967.75	2872.25	2671.5	3275.5	3062.25	4953.75	3649.25
ENSMGAG00000001572	RFX2	regulatory factor X2	2606.25	2533.5	2075.75	1364.25	1873	1502.75	2209.75
ENSMGAG00000001573	ENSMGAG00000001573	Rieske domain-containing protein	0	0	0	0.25	0	0	0
ENSMGAG00000001575	ENSMGAG00000001575	Uncharacterized protein	1.5	1.25	1.25	3.5	1	0	0.5
ENSMGAG00000001576	SLC12A7	solute carrier family 12 member 7 [Source:HGNC Symbol;Acc:HGNC:10915]	1741.25	1702.5	1543.5	1830.25	1941	1839.75	2348.5
ENSMGAG00000001578	COG4	component of oligomeric golgi complex 4	1097.25	1141.25	1096	1266.75	1182.25	975	963
ENSMGAG00000001580	LOC100548568	mitochondrial peptide methionine sulfoxide reductase-like	3	2.5	6.75	2.25	3	2	1.5
ENSMGAG00000001581	FGF18	fibroblast growth factor 18	4.5	1.25	1.75	0.75	1.5	0.75	1
ENSMGAG00000001582	CPNE1	copine 1 [Source:HGNC Symbol;Acc:HGNC:2314]	1194	1217.75	1162	1257	1257.5	1123.5	1236.75
ENSMGAG00000001583	ELP4	elongator acetyltransferase complex subunit 4 [Source:HGNC Symbol;Acc:HGNC:1171]	138.75	118.75	108.25	140	105.25	112.75	79.5
ENSMGAG00000001585	PAPSS2	3'-phosphoadenosine 5'-phosphosulfate synthase 2 [Source:HGNC Symbol;Acc:HGNC:8604]	509.75	552.75	451.75	655	284.25	874.75	458.5
ENSMGAG00000001586	ZNF618	zinc finger protein 618 [Source:HGNC Symbol;Acc:HGNC:29416]	440.5	492.5	422.5	385.75	530.75	261.5	405
ENSMGAG00000001587	SYT4	synaptotagmin 4 [Source:HGNC Symbol;Acc:HGNC:11512]	0	0.25	0	0	0	0.5	0
ENSMGAG00000001588	CSPG5	chondroitin sulfate proteoglycan 5 [Source:HGNC Symbol;Acc:HGNC:2467]	42	73.5	80.25	44.25	51.25	55.25	35.5
ENSMGAG00000001589	CTSO	cathepsin O [Source:HGNC Symbol;Acc:HGNC:2542]	180.5	168.25	187.75	96.5	126.5	149.5	165.5
ENSMGAG00000001590	ENSMGAG00000001590	Uncharacterized protein	917.75	964.75	1191.5	389.25	895	1128	772.25
ENSMGAG00000001591	NPM1	nucleophosmin	6672.25	4694.5	5984.5	4416	4283.5	5377.75	3649
ENSMGAG00000001592	DUSP26	dual specificity phosphatase 26 [Source:HGNC Symbol;Acc:HGNC:28161]	60.25	75.25	78.75	56.75	90.5	37.25	69.75
ENSMGAG00000001595	IMMP1L	inner mitochondrial membrane peptidase subunit 1 [Source:HGNC Symbol;Acc:HGNC:26317]	138	120	125.75	138.25	142.75	144	107.5
ENSMGAG00000001596	OPRD1	opioid receptor delta 1	0.25	0	0	0	0	0	0.5
ENSMGAG00000001597	SF3B3	splicing factor 3b subunit 3	3628.75	3220.5	3393.75	3853.5	3237.5	3093	2728.25
ENSMGAG00000001598	SYT2	synaptotagmin 2	1.25	0.25	0	0	0.5	0.25	0.75
ENSMGAG00000001599	C1orf174	chromosome 1 open reading frame 174 [Source:HGNC Symbol;Acc:HGNC:27915]	166	124.75	139	107.25	89.75	109	90
ENSMGAG00000001600	TAF9B	TATA-box binding protein associated factor 9b	895	877.25	830	804.25	767.75	785.25	686.75
ENSMGAG00000001601	SENP8	SUMO peptidase family member, NEDD8 specific [Source:HGNC Symbol;Acc:HGNC:22992]	252	243	244.75	231	243.25	189.25	206.5
ENSMGAG00000001602	DNAJC24	DnaJ heat shock protein family (Hsp40) member C24 [Source:HGNC Symbol;Acc:HGNC:26979]	123.75	105	92.75	95.75	83	94.5	103
ENSMGAG00000001603	DFFB	DNA fragmentation factor subunit beta [Source:HGNC Symbol;Acc:HGNC:2773]	209.25	212.75	182	185.25	182.5	119.25	121.5
ENSMGAG00000001605	SCAP	SREBF chaperone [Source:HGNC Symbol;Acc:HGNC:30634]	924	1069.5	926	791.75	848	721.5	794.75
ENSMGAG00000001606	POFUT2	protein O-fucosyltransferase 2	1534.75	1502.5	1518.75	1659.5	1606.5	1363	1379
ENSMGAG00000001607	INPP5D	inositol polyphosphate-5-phosphatase D	296.5	324.5	285	229.25	216	138.25	236.75
ENSMGAG00000001608	PTEN	phosphatase and tensin homolog	1649	1554	1511.25	1586.5	1350.75	1575.75	1402.75
ENSMGAG00000001610	YTHDF2	YTH N6-methyladenosine RNA binding protein 2	1203.75	1151	1090.75	1040.75	1082	865	935.75
ENSMGAG00000001611	GRAMD2A	GRAM domain containing 2A [Source:HGNC Symbol;Acc:HGNC:27287]	184.75	186.5	166	147.25	173.5	108.5	143.25
ENSMGAG00000001612	TTI2	TELO2 interacting protein 2 [Source:HGNC Symbol;Acc:HGNC:26262]	257.25	239.5	235.5	262	254	240.5	226.25
ENSMGAG00000001614	VPS26B	VPS26, retromer complex component B [Source:HGNC Symbol;Acc:HGNC:28119]	838.25	909.5	782	755.25	815.5	649.75	738
ENSMGAG00000001615	MPPED2	metallophosphoesterase domain containing 2 [Source:HGNC Symbol;Acc:HGNC:1180]	1686.75	1642.5	1424	1237	1493.25	1100.5	1426.75
ENSMGAG00000001616	ENDOU	endonuclease, poly(U) specific [Source:HGNC Symbol;Acc:HGNC:14369]	0	1	0	0.75	0.5	1.5	0.25
ENSMGAG00000001619	LOC104912990	estradiol 17-beta-dehydrogenase 2-like	0.25	0.5	0	0	0.5	0	0.25
ENSMGAG00000001620	RNF224	ring finger protein 224 [Source:HGNC Symbol;Acc:HGNC:41912]	81.5	67.25	62	66.25	119.5	58.25	79.25
ENSMGAG00000001621	ARL14EP	ADP ribosylation factor like GTPase 14 effector protein [Source:HGNC Symbol;Acc:HGNC:26798]	430.75	418.75	454	401.25	421.75	387.5	413.75
ENSMGAG00000001622	THYN1	thymocyte nuclear protein 1 [Source:HGNC Symbol;Acc:HGNC:29560]	1636.75	1424.25	1640.5	993	1042	1210.75	961.5
ENSMGAG00000001624	ENSMGAG00000001624	Uncharacterized protein	296.5	254.75	322.25	113	162.5	305.5	332
ENSMGAG00000001625	ACSBG2	acyl-CoA synthetase bubblegum family member 2	5457.25	6145.5	5086.5	2904.25	5781.75	2821	5259.75
ENSMGAG00000001626	PKM	pyruvate kinase M1/2 [Source:HGNC Symbol;Acc:HGNC:9021]	10682.5	10354.5	10488.2	7224.5	10068.2	7309.25	8436
ENSMGAG00000001628	POC1A	POC1 centriolar protein A [Source:HGNC Symbol;Acc:HGNC:24488]	214.75	168.25	158.5	126	97.5	200.75	121.75
ENSMGAG00000001630	LOC100539152	fibronectin type-III domain-containing protein 3a-like	3093.5	3477.75	3131.25	5759.75	3477.5	2611.5	2838.25
ENSMGAG00000001631	MTSS2	MTSS I-BAR domain containing 2	367.25	427	404.75	259	274.75	180.25	282
ENSMGAG00000001632	GRIN1	glutamate ionotropic receptor NMDA type subunit 1	6.25	6.5	7	0.5	0.75	2.25	1
ENSMGAG00000001633	PDGFC	Platelet-derived growth factor C (Platelet-derived growth factor C, latent form) (Platelet-derived growth factor C, receptor-binding form)	243.5	228.75	234	183.75	200.25	198	235.5
ENSMGAG00000001634	KCNA4	potassium voltage-gated channel subfamily A member 4 [Source:HGNC Symbol;Acc:HGNC:6222]	5.25	5.5	4.25	2.5	6.5	16.5	11.25
ENSMGAG00000001635	MAK16	MAK16 homolog [Source:HGNC Symbol;Acc:HGNC:13703]	879.75	771.5	873	1074.25	1029	1187.75	860.25
ENSMGAG00000001637	CEP104	centrosomal protein 104 [Source:HGNC Symbol;Acc:HGNC:24866]	1891.75	1800.25	1639.5	1495	1457.75	1692.75	1660
ENSMGAG00000001638	ACAD8	acyl-CoA dehydrogenase family member 8 [Source:HGNC Symbol;Acc:HGNC:87]	738.5	789.25	759.5	526.5	733.75	444	541.75
ENSMGAG00000001640	MCM3AP	minichromosome maintenance complex component 3 associated protein [Source:HGNC Symbol;Acc:HGNC:6946]	1155.25	1246.5	1142.25	1354.5	1108	1180	1101.25
ENSMGAG00000001641	LOC100540213	uncharacterized protein KIAA1841-like	287	306.25	271.75	328.75	309.25	266	319.5
ENSMGAG00000001642	LOC104914452	protein phosphatase 1 regulatory subunit 12B-like	318.5	353.75	287.25	281.75	320.75	245.75	315.25
ENSMGAG00000001643	NPTX2	Neuronal pentraxin 2	2490.5	1912.5	1868.5	715.75	972.75	1306.25	1097.25
ENSMGAG00000001644	NMNAT2	nicotinamide nucleotide adenylyltransferase 2	0.5	1.5	0.75	0.5	0	1	1.5
ENSMGAG00000001646	LOC100546971	protein VAC14 homolog	170.5	179.75	182.75	203	183.75	160	156.75
ENSMGAG00000001647	AEBP1	AE binding protein 1	2218.25	1944.5	2062.75	515.75	863.25	497.75	733.75
ENSMGAG00000001648	PGAM5	PGAM family member 5, mitochondrial serine/threonine protein phosphatase	467.25	454	492.5	400.5	438.75	413.25	375.5
ENSMGAG00000001649	FSHB	follicle stimulating hormone subunit beta [Source:HGNC Symbol;Acc:HGNC:3964]	0	0	0	0	0	0	0
ENSMGAG00000001651	LOC100540196	beta-galactosidase-1-like protein 2	745.5	437.5	616.25	432.25	603.25	489.25	486
ENSMGAG00000001652	NGEF	neuronal guanine nucleotide exchange factor [Source:HGNC Symbol;Acc:HGNC:7807]	368.75	349.75	273	232	377	201	389.5
ENSMGAG00000001653	METTL15	methyltransferase like 15 [Source:HGNC Symbol;Acc:HGNC:26606]	53	58.75	52.75	39	52	37	35.75
ENSMGAG00000001654	NSUN5	NOP2/Sun RNA methyltransferase 5	371.25	333	325	311.25	343	293.75	274.25
ENSMGAG00000001655	ENSMGAG00000001655	Uncharacterized protein	2.5	3.75	1.5	0.25	0.5	0	0.5
ENSMGAG00000001656	DCAF7	DDB1 and CUL4 associated factor 7 [Source:HGNC Symbol;Acc:HGNC:30915]	195	224.25	183.75	212.75	156.75	161.25	201
ENSMGAG00000001657	TMEM130	transmembrane protein 130	1280	1197	1121	969	1259.75	1284.75	1285.25
ENSMGAG00000001658	SLC18A1	solute carrier family 18 member A1 [Source:HGNC Symbol;Acc:HGNC:10934]	0	0	0	0	0	0	0
ENSMGAG00000001659	GLRB	glycine receptor beta [Source:HGNC Symbol;Acc:HGNC:4329]	3.5	4.75	3	1.5	4.25	3.25	1.5
ENSMGAG00000001660	KIF18A	kinesin family member 18A [Source:HGNC Symbol;Acc:HGNC:29441]	90	53.25	69	12	12	15.5	11.5
ENSMGAG00000001661	TPGS2	tubulin polyglutamylase complex subunit 2 [Source:HGNC Symbol;Acc:HGNC:24561]	157.25	138	153.5	136.25	130.5	158.75	137
ENSMGAG00000001662	LAMC2	laminin subunit gamma 2	4401	3907.75	3404.5	1955.5	2593.75	2689.75	3094.75
ENSMGAG00000001664	LOC100547495	nuclear envelope pore membrane protein POM 121-like	717.5	743.75	649.75	687	767.25	502	635.75
ENSMGAG00000001665	LRSAM1	leucine rich repeat and sterile alpha motif containing 1	691.75	749.25	677	635.5	665.25	604	629
ENSMGAG00000001667	TRRAP	transformation/transcription domain associated protein	3336.75	3313	3022	2715	2691	2711.5	2662.25
ENSMGAG00000001668	ENSMGAG00000001668	Uncharacterized protein	3.25	2	2.75	1.25	3.5	4.75	3.25
ENSMGAG00000001669	PEX13	peroxisomal biogenesis factor 13 [Source:HGNC Symbol;Acc:HGNC:8855]	572.5	581	541.75	679.25	727.5	514.75	633
ENSMGAG00000001670	LRRC47	leucine rich repeat containing 47 [Source:HGNC Symbol;Acc:HGNC:29207]	215	213.75	171.75	199.75	205.25	158.5	142
ENSMGAG00000001671	MLLT1	MLLT1, super elongation complex subunit	445.25	501	437.5	506.25	519	324.75	432
ENSMGAG00000001672	GHITM	growth hormone inducible transmembrane protein [Source:HGNC Symbol;Acc:HGNC:17281]	3320.5	3301.5	3219	4271.5	4533.25	3020.5	3149.5
ENSMGAG00000001673	RRP9	ribosomal RNA processing 9, small subunit (SSU) processome component, homolog (yeast)	1002.75	923.5	934	813	826.25	806.5	711
ENSMGAG00000001674	LOC100547762	aquaporin-7-like	1.75	3.5	4.5	3.5	6.25	2.25	4.75
ENSMGAG00000001679	FTCD	formimidoyltransferase cyclodeaminase [Source:HGNC Symbol;Acc:HGNC:3974]	0.75	0	1	0	0	0.25	0
ENSMGAG00000001680	MAP3K3	mitogen-activated protein kinase kinase kinase 3 [Source:HGNC Symbol;Acc:HGNC:6855]	248.25	280.5	254.5	282.25	300	224.5	293.5
ENSMGAG00000001683	LOC100541903	putative tRNA pseudouridine synthase Pus10	85.75	90.25	78.75	64.75	72.75	51.75	80.25
ENSMGAG00000001684	ITM2A	integral membrane protein 2A [Source:HGNC Symbol;Acc:HGNC:6173]	6955	7585.5	7288.25	12021	11425.2	10525	9536.25
ENSMGAG00000001685	ENSMGAG00000001685	Uncharacterized protein	5.75	1.5	0.75	1.25	1.5	2.25	1.5
ENSMGAG00000001686	PTPN23	protein tyrosine phosphatase non-receptor type 23 [Source:HGNC Symbol;Acc:HGNC:14406]	964.75	1015.75	893	816.25	937.75	543.5	755
ENSMGAG00000001689	RANBP17	RAN binding protein 17	53.5	46.5	44.75	67.5	40	58.5	49.25
ENSMGAG00000001690	CCDC61	coiled-coil domain containing 61	957.5	968.25	833.25	748.5	741	570	632.5
ENSMGAG00000001692	WRAP73	WD repeat containing, antisense to TP73 [Source:HGNC Symbol;Acc:HGNC:12759]	356	243.75	274.25	225.5	159.5	135	107
ENSMGAG00000001694	FHOD1	formin homology 2 domain containing 1	1233	1267.5	1043	805.5	893.5	763.25	1031
ENSMGAG00000001695	PARP6	poly(ADP-ribose) polymerase family member 6	838.25	881.25	781	681.5	719.25	519	797.25
ENSMGAG00000001696	SAG	S-antigen visual arrestin	1.75	1	1.5	1.75	1.5	0.5	0
ENSMGAG00000001697	LOC100546575	angiopoietin-related protein 1-like	2.25	3	4.25	3.25	4.5	3.25	5
ENSMGAG00000001699	FAM76A	family with sequence similarity 76 member A	532	536.75	517.25	463	542.75	380	464.75
ENSMGAG00000001700	TBX22	T-box transcription factor 22	37	12.75	19.25	4.25	7.5	7	8.5
ENSMGAG00000001701	LOC100540249	fer-1-like protein 4	364.25	372	293.75	371	522.75	420.75	612.25
ENSMGAG00000001702	LGR4	leucine rich repeat containing G protein-coupled receptor 4	43.75	40	46.25	50	46.25	27	34.25
ENSMGAG00000001703	FKBP15	FKBP prolyl isomerase family member 15 [Source:HGNC Symbol;Acc:HGNC:23397]	1119.5	1189.5	1118.25	1860	1165.75	989.5	1152
ENSMGAG00000001704	LOC100546728	angiopoietin-related protein 1-like	3.25	4.75	4.75	3.5	4	2.5	2
ENSMGAG00000001706	B3GAT1	beta-1,3-glucuronyltransferase 1 [Source:HGNC Symbol;Acc:HGNC:921]	347.25	368.75	330.5	143.75	263	123.75	223.5
ENSMGAG00000001707	HIP1	huntingtin interacting protein 1	433.5	531.25	454.5	375	398	298	376
ENSMGAG00000001708	GOLGA3	golgin A3	1366	1634.5	1425	2157	1698.75	1719.75	1859.25
ENSMGAG00000001709	ATP6V1B2	ATPase H+ transporting V1 subunit B2 [Source:HGNC Symbol;Acc:HGNC:854]	1585.75	1649	1631.75	1530	1488.5	1498	1231.5
ENSMGAG00000001711	CHMP1B	charged multivesicular body protein 1B	1515.75	1403.5	1358.75	1804.25	1497.75	1487.5	1318.75
ENSMGAG00000001712	GRIA2	glutamate ionotropic receptor AMPA type subunit 2 [Source:HGNC Symbol;Acc:HGNC:4572]	210.5	147.25	172	88	93.75	53	91.75
ENSMGAG00000001713	MINDY4	MINDY lysine 48 deubiquitinase 4 [Source:HGNC Symbol;Acc:HGNC:21916]	464.25	407.25	438.75	381.75	362.75	368.5	403
ENSMGAG00000001715	ACER1	alkaline ceramidase 1	9.25	6.75	10.5	2.25	8.25	0.25	2.75
ENSMGAG00000001716	GMEB1	glucocorticoid modulatory element binding protein 1	240.25	225.5	172.25	161	184.25	127.5	175.75
ENSMGAG00000001718	LOC100548047	SNF-related serine/threonine-protein kinase-like	141.75	179.5	145.75	154.25	165.25	123.5	170.25
ENSMGAG00000001719	COL6A2	collagen type VI alpha 2 chain [Source:HGNC Symbol;Acc:HGNC:2212]	22059.5	27977	27637.2	9463.75	11958.8	7469.5	12249
ENSMGAG00000001720	PNP	purine nucleoside phosphorylase	0	0.75	1.25	0	0	0.5	0.25
ENSMGAG00000001721	REL	Proto-oncogene c-Rel	386	415.75	369	302.5	343	347.25	326.25
ENSMGAG00000001722	ENSMGAG00000001722	Ring finger protein 123	562	538.25	524	586	541.75	473.25	494.25
ENSMGAG00000001723	LAMC1	laminin subunit gamma 1	6145.5	7423.25	7037.25	4503	4569.25	3717.75	4417.25
ENSMGAG00000001725	ENSMGAG00000001725	Uncharacterized protein	201.5	223	188.75	208.75	217	149.5	170
ENSMGAG00000001726	LOC100545806	forkhead box protein L1	28.5	21.5	21.5	15.25	18	8.75	10
ENSMGAG00000001727	LOC100545141	acidic leucine-rich nuclear phosphoprotein 32 family member B	1341.75	1054.5	1182	892.75	954.25	1001.5	796.5
ENSMGAG00000001728	BAZ1B	bromodomain adjacent to zinc finger domain 1B	860.25	808.5	768.75	936	796.75	662.5	768.75
ENSMGAG00000001731	TAF12	TATA-box binding protein associated factor 12	521.75	429.5	446.25	421.25	421	451.5	343
ENSMGAG00000001732	CHFR	checkpoint with forkhead and ring finger domains	506.25	506.25	473.75	515.25	413.75	380.75	452.5
ENSMGAG00000001733	PDGFA	Platelet derived growth factor subunit A	120.75	111	129.25	71.25	94	80.25	73
ENSMGAG00000001734	LZTS1	leucine zipper tumor suppressor 1 [Source:HGNC Symbol;Acc:HGNC:13861]	303	238.75	254	179.5	335.25	100.5	231
ENSMGAG00000001735	LIMD2	LIM domain containing 2	104.5	117	123.25	85.25	65	73.75	76.25
ENSMGAG00000001736	TPRG1L	tumor protein p63 regulated 1 like [Source:HGNC Symbol;Acc:HGNC:27007]	1907.75	1993.75	1940.25	3069.75	2455.5	1635.75	1665.75
ENSMGAG00000001738	ENOX2	ecto-NOX disulfide-thiol exchanger 2	1225	1202.75	1201.75	1388.5	1116.75	1081.75	965
ENSMGAG00000001740	ATP12A	ATPase H+/K+ transporting non-gastric alpha2 subunit	904	499.5	755	788.75	678.5	168.25	348.25
ENSMGAG00000001741	PAPOLG	Polynucleotide adenylyltransferase (EC 2.7.7.19)	105	63.5	70.5	32	26.5	72.5	38.25
ENSMGAG00000001743	MTFR1L	Mitochondrial fission regulator 1 like	573	550	553.25	739.25	628.75	722.75	581.5
ENSMGAG00000001745	AQP1	aquaporin 1 (Colton blood group)	875	946.25	852.25	1162.5	895	1063.75	803.75
ENSMGAG00000001746	LOC100547805	E3 ubiquitin-protein ligase TRIM39-like	222	228.25	214	192.5	219.5	313.25	239.25
ENSMGAG00000001747	GASK1B	golgi associated kinase 1B [Source:HGNC Symbol;Acc:HGNC:25312]	314.75	371.25	372.75	137.75	183.5	85.25	176.75
ENSMGAG00000001750	ATG16L1	autophagy related 16 like 1	548	549	549.25	693	621.5	606.75	557.25
ENSMGAG00000001752	CELA1	chymotrypsin like elastase 1 [Source:HGNC Symbol;Acc:HGNC:3308]	0.5	0	0	0	0	0	0.25
ENSMGAG00000001753	RNF113A	ring finger protein 113A	275.75	291	285.75	334.25	284.75	336.5	282.75
ENSMGAG00000001754	AGRP	agouti related neuropeptide	4.5	3.25	2.75	2.25	6	8.5	2.25
ENSMGAG00000001755	RPL12	ribosomal protein L12	6563.25	5268.25	5750.75	5159.75	4968.75	4921.75	3851.75
ENSMGAG00000001756	LOC100538523	tetraspanin-15-like	424.5	327.25	354.5	188.75	288.75	266.75	221.75
ENSMGAG00000001757	TMEM144	transmembrane protein 144 [Source:HGNC Symbol;Acc:HGNC:25633]	201.75	181.75	159.25	106	88	78.25	123.75
ENSMGAG00000001759	PRKAR1B	protein kinase cAMP-dependent type I regulatory subunit beta	263.5	278.75	291	273.25	294.5	238	265
ENSMGAG00000001760	ATP6V0D1	ATPase H+ transporting V0 subunit d1	788.25	857.5	807.25	1177.75	984	1027.5	895.75
ENSMGAG00000001761	KCNC4	potassium voltage-gated channel subfamily C member 4	0	0	0.25	1.25	2.25	1.25	1.75
ENSMGAG00000001763	NEU2	neuraminidase 2 [Source:HGNC Symbol;Acc:HGNC:7759]	15.25	10	13.75	4.75	9	6	7.5
ENSMGAG00000001764	CCDC34	coiled-coil domain containing 34 [Source:HGNC Symbol;Acc:HGNC:25079]	316.5	248.5	243.5	222	218.25	342	211.75
ENSMGAG00000001765	MYO1F	myosin IF	321	292.25	277.75	193	189.5	145.25	191.25
ENSMGAG00000001766	GFRA2	GDNF family receptor alpha 2 [Source:HGNC Symbol;Acc:HGNC:4244]	15.25	12.25	26	5	7.75	3.5	6.25
ENSMGAG00000001767	SNORC	secondary ossification center associated regulator of chondrocyte maturation [Source:HGNC Symbol;Acc:HGNC:33763]	0	0.25	0.5	0.5	0.25	0	0.25
ENSMGAG00000001768	LOC100545035	C-C motif chemokine 4-like	11	8.25	7.25	4.5	7.75	19.75	8.75
ENSMGAG00000001769	GHRHR	growth hormone releasing hormone receptor [Source:HGNC Symbol;Acc:HGNC:4266]	4.75	7	5.5	3.75	2.5	6.25	1.5
ENSMGAG00000001770	MEGF6	multiple EGF like domains 6 [Source:HGNC Symbol;Acc:HGNC:3232]	174	186.75	146.75	700.25	219.5	23.75	76.75
ENSMGAG00000001771	ENSMGAG00000001771	pseudogene	1434.25	1455.25	1341.5	1385.75	1442.75	1384.75	1420.25
ENSMGAG00000001772	BBOX1	gamma-butyrobetaine hydroxylase 1 [Source:HGNC Symbol;Acc:HGNC:964]	135.25	158	135.5	157.25	186.75	162.25	221.25
ENSMGAG00000001774	SLC31A1	solute carrier family 31 member 1 [Source:HGNC Symbol;Acc:HGNC:11016]	613.75	862.25	757	1618.25	961.75	1021.75	823.5
ENSMGAG00000001775	CALB2	calbindin 2	24	8.5	12.25	4	2	4.25	3.25
ENSMGAG00000001776	BIN2	bridging integrator 2 [Source:HGNC Symbol;Acc:HGNC:1053]	63	47.25	45	47.75	30	25.5	34
ENSMGAG00000001778	SELENON	selenoprotein N	1411.25	1427.25	1476.25	1168	1296	1130.75	1132.5
ENSMGAG00000001779	ENSMGAG00000001779	Uncharacterized protein	34.75	41	26.5	23.75	23.25	17.5	30.25
ENSMGAG00000001780	SLC25A14	solute carrier family 25 member 14	464.5	487	457.75	595.25	484.75	374	392.25
ENSMGAG00000001782	STRADA	STE20 related adaptor alpha [Source:HGNC Symbol;Acc:HGNC:30172]	965.25	872.75	871.25	918.25	783.75	772.5	685.75
ENSMGAG00000001784	CCL26	C-C motif chemokine ligand 26	20.5	17.5	24.25	24.25	11.25	6.5	12.25
ENSMGAG00000001787	FBRSL1	Fibrosin like 1	1917.5	1836.25	1753.75	1753.25	1728	1404.25	1585.5
ENSMGAG00000001788	ANXA4	annexin A4	4320.75	4235	3819.75	4387.5	4914.25	4425.5	4419.75
ENSMGAG00000001789	COL6A1	collagen type VI alpha 1 chain	16280	20507	19999.8	6181	8574.5	4473	8911.5
ENSMGAG00000001791	ENSMGAG00000001791	SCY domain-containing protein	29	33.5	33	10	37	15	23.5
ENSMGAG00000001792	ENSMGAG00000001792	Uncharacterized protein	8.75	7.75	3.75	2.75	3.5	2.25	2.75
ENSMGAG00000001793	LPO	lactoperoxidase	24.75	109.5	261	173	220.25	20195.2	5911
ENSMGAG00000001795	VIPR1	vasoactive intestinal peptide receptor 1 [Source:HGNC Symbol;Acc:HGNC:12694]	25.25	49.5	31.25	24.75	29	158.25	75.5
ENSMGAG00000001796	PRPF4	pre-mRNA processing factor 4 [Source:HGNC Symbol;Acc:HGNC:17349]	913.25	835.5	831.5	819.25	820	851	689.75
ENSMGAG00000001797	LOC100541369	interferon-induced guanylate-binding protein 1-like	26.25	28.25	25.5	21.25	8.25	13.5	20.75
ENSMGAG00000001798	SLC5A12	solute carrier family 5 member 12 [Source:HGNC Symbol;Acc:HGNC:28750]	1.75	0.25	0	0	0.25	0	0
ENSMGAG00000001799	KCNU1	potassium calcium-activated channel subfamily U member 1 [Source:HGNC Symbol;Acc:HGNC:18867]	12.75	14	12.75	2.25	2.75	1.5	3.25
ENSMGAG00000001800	RXFP1	relaxin family peptide receptor 1 [Source:HGNC Symbol;Acc:HGNC:19718]	2079.75	1861.5	1487.75	1112.5	2026.5	416.5	1305.25
ENSMGAG00000001801	RBMX2	RNA binding motif protein X-linked 2	474.5	469.25	414	567.75	468.25	460	391.5
ENSMGAG00000001802	MAN1C1	mannosidase alpha class 1C member 1	485.75	431.25	450.5	267.5	281.25	241.25	266
ENSMGAG00000001803	ADAMTS10	ADAM metallopeptidase with thrombospondin type 1 motif 10	839.25	943.75	930	397.5	683	270.75	528.25
ENSMGAG00000001804	CELF6	CUGBP Elav-like family member 6	128.5	130.25	131.75	97.25	114.75	92.25	94.25
ENSMGAG00000001805	ENSMGAG00000001805	Microtubule-associated protein	1307.5	1436.75	1110	1031.5	1192	695.25	1371.25
ENSMGAG00000001806	TRIP13	thyroid hormone receptor interactor 13 [Source:HGNC Symbol;Acc:HGNC:12307]	83.5	29	59	13.25	6.75	16	10
ENSMGAG00000001807	SARNP	SAP domain containing ribonucleoprotein	364.5	326.75	326.25	270.5	310.75	238.75	255.75
ENSMGAG00000001808	RAB33A	RAB33A, member RAS oncogene family	31.5	31	29.75	43.25	28.5	12	19.75
ENSMGAG00000001809	CCDC47	coiled-coil domain containing 47 [Source:HGNC Symbol;Acc:HGNC:24856]	800.75	761.75	765.25	1256.5	834	1615.25	890.25
ENSMGAG00000001810	AK6	adenylate kinase 6	348.75	294.25	284.25	266	228.25	265.5	214.25
ENSMGAG00000001811	TNNI1	troponin I1, slow skeletal type [Source:HGNC Symbol;Acc:HGNC:11945]	2.75	2	2.75	1.25	0.75	0	0
ENSMGAG00000001812	LOC100546874	cytochrome P450 2W1-like	1352.75	992.25	873.5	389.5	323.75	318.25	418.25
ENSMGAG00000001813	ARHGEF16	Rho guanine nucleotide exchange factor 16 [Source:HGNC Symbol;Acc:HGNC:15515]	1975.5	2376	1895	1771	2301.75	1186	1605.25
ENSMGAG00000001814	KRT8	keratin, type II cytoskeletal 8	2759.75	2777.75	2705.75	1992	2664.75	2084.25	1712.25
ENSMGAG00000001815	ENSMGAG00000001815	Uncharacterized protein	169	140.25	148.25	84.75	112.5	100	89.25
ENSMGAG00000001817	HSD11B2	Hydroxysteroid 11-beta dehydrogenase 2	1222.25	2492.75	2035.5	2638.5	2001.75	3344	1934
ENSMGAG00000001818	LOC100547030	cytochrome P450 2W1-like	3.25	3.75	4	8.25	4.75	6.5	5.75
ENSMGAG00000001819	WDR31	WD repeat domain 31 [Source:HGNC Symbol;Acc:HGNC:21421]	2764	3163.25	2214.25	1227	1182.5	1354.75	1650.75
ENSMGAG00000001820	ERGIC3	ERGIC and golgi 3 [Source:HGNC Symbol;Acc:HGNC:15927]	938	976.75	908.75	1165.75	1266	1202.5	1129.5
ENSMGAG00000001821	ENSMGAG00000001821	Amino_oxidase domain-containing protein	530.25	393.75	412.75	403.5	429	270	375.75
ENSMGAG00000001822	DDX42	DEAD-box helicase 42	1351.5	1402.25	1201.75	1344.5	1218.75	1162	1251.5
ENSMGAG00000001823	UNC5D	unc-5 netrin receptor D [Source:HGNC Symbol;Acc:HGNC:18634]	6.25	8	6	3	4.5	3.5	2.25
ENSMGAG00000001825	NEMP1	nuclear envelope integral membrane protein 1	360.5	356	335.5	298.5	356.75	302	305.5
ENSMGAG00000001826	MTG1	mitochondrial ribosome associated GTPase 1	891.5	867.5	836.25	831.25	905.5	662.5	750.75
ENSMGAG00000001827	KCNIP1	potassium voltage-gated channel interacting protein 1 [Source:HGNC Symbol;Acc:HGNC:15521]	46	46.25	42.5	19.75	20	35.5	21.25
ENSMGAG00000001828	MARS2	methionyl-tRNA synthetase 2, mitochondrial	275.75	262	257	266.25	289.25	265.25	231
ENSMGAG00000001831	SNRNP200	small nuclear ribonucleoprotein U5 subunit 200	3830.75	3840	3535	3286.25	3535.25	2821.75	3144.5
ENSMGAG00000001832	ARIH1	ariadne RBR E3 ubiquitin protein ligase 1 [Source:HGNC Symbol;Acc:HGNC:689]	954.25	989	973	989.75	980	1003.75	991.5
ENSMGAG00000001837	ENSMGAG00000001837	Uncharacterized protein	572	665.75	663.75	696.25	612	490.75	528
ENSMGAG00000001839	CEP250	centrosomal protein 250 [Source:HGNC Symbol;Acc:HGNC:1859]	636	637.25	588	657.5	612.5	631	633.5
ENSMGAG00000001841	RAB11FIP1	RAB11 family interacting protein 1 [Source:HGNC Symbol;Acc:HGNC:30265]	3117.5	3142.75	2787.5	3479.25	3578	3525.5	3351.25
ENSMGAG00000001842	LAD1	ladinin 1 [Source:HGNC Symbol;Acc:HGNC:6472]	1911.75	1887.5	1726.5	1437.75	2574	1041.5	1679.5
ENSMGAG00000001844	LOC100551326	kazal-type serine protease inhibitor domain-containing protein 1-like	78.75	67.5	74.5	80	86	99.75	71.75
ENSMGAG00000001845	MACO1	macoilin 1 [Source:HGNC Symbol;Acc:HGNC:25572]	1672	1875.25	1824.25	2460.25	1883.75	2107.75	1770.75
ENSMGAG00000001846	SCN3B	sodium voltage-gated channel beta subunit 3 [Source:HGNC Symbol;Acc:HGNC:20665]	15.5	7.25	7.25	8.5	14.5	3.75	7.5
ENSMGAG00000001847	ENSMGAG00000001847	Polypeptide N-acetylgalactosaminyltransferase (EC 2.4.1.-) (Protein-UDP acetylgalactosaminyltransferase)	1.5	1.75	2.75	0.75	0.5	1	0.5
ENSMGAG00000001848	AIFM1	apoptosis inducing factor, mitochondria associated 1	1695.75	1678.75	1652.25	1957	1989.75	1712.75	1613.5
ENSMGAG00000001849	ECHS1	enoyl-CoA hydratase, short chain 1	2565.75	2527.75	2608.75	2446.5	2538.25	2023.5	1803.25
ENSMGAG00000001851	BSPRY	B-box and SPRY domain containing [Source:HGNC Symbol;Acc:HGNC:18232]	232.25	207.25	184.75	147.5	203.5	158.25	166.25
ENSMGAG00000001852	FANCL	FA complementation group L	67.5	33.25	44.5	7.5	4	7.5	5.25
ENSMGAG00000001853	BRD9	bromodomain containing 9 [Source:HGNC Symbol;Acc:HGNC:25818]	430	405	411.25	431.5	447.25	561.75	409.75
ENSMGAG00000001855	ALAD	aminolevulinate dehydratase [Source:HGNC Symbol;Acc:HGNC:395]	833.25	1143.75	886.25	1334.5	1111.25	717.75	700.75
ENSMGAG00000001856	GOT2	glutamic-oxaloacetic transaminase 2	2301.5	2412.75	2366.25	2693.5	2845	1920.5	2092.25
ENSMGAG00000001857	PRDM16	PR/SET domain 16 [Source:HGNC Symbol;Acc:HGNC:14000]	6.5	15	10	7.25	8.5	7.25	10
ENSMGAG00000001858	GABRP	gamma-aminobutyric acid type A receptor subunit pi	3085.75	2892	2464	1134.75	1634.25	1494.75	2357.25
ENSMGAG00000001859	ANO3	anoctamin 3 [Source:HGNC Symbol;Acc:HGNC:14004]	44.75	64.75	83.25	35.75	39.75	50.5	61.5
ENSMGAG00000001860	ABHD8	abhydrolase domain containing 8 [Source:HGNC Symbol;Acc:HGNC:23759]	2	1.25	1.75	1	2	0.75	1.5
ENSMGAG00000001861	BRF2	BRF2 RNA polymerase III transcription initiation factor subunit [Source:HGNC Symbol;Acc:HGNC:17298]	149.5	173	145.5	135	133.5	111.5	136.5
ENSMGAG00000001863	LOC100542877	tyrosine-protein kinase ZAP-70	42.5	41.75	39	45	21.5	31.25	36.75
ENSMGAG00000001865	TUBGCP2	tubulin gamma complex associated protein 2	1175	1212.25	1225.75	1163	1013.5	1124	982.25
ENSMGAG00000001866	LOC100543646	parathyroid hormone/parathyroid hormone-related peptide receptor-like	0	0	0	0	0	0	0
ENSMGAG00000001867	LOC100548108	1-acyl-sn-glycerol-3-phosphate acyltransferase alpha-like	0.75	0.25	0	0.25	0	0	0.5
ENSMGAG00000001868	TNNT2	troponin T2, cardiac type [Source:NCBI gene (formerly Entrezgene);Acc:100303665]	3.25	3.5	1.75	4.5	1.25	0.75	2.75
ENSMGAG00000001869	GRAMD1B	GRAM domain containing 1B [Source:HGNC Symbol;Acc:HGNC:29214]	346.5	485.25	335.5	453.25	312.5	231.25	328
ENSMGAG00000001870	C3orf18	chromosome 3 open reading frame 18 [Source:HGNC Symbol;Acc:HGNC:24837]	460.5	509.75	427.5	339.5	327.25	257.75	333.5
ENSMGAG00000001871	ADGRA2	adhesion G protein-coupled receptor A2 [Source:HGNC Symbol;Acc:HGNC:17849]	1239.5	1304.5	1295.5	962.75	1527.25	808.75	1135.75
ENSMGAG00000001872	VRK2	VRK serine/threonine kinase 2	574.5	607.75	566.5	979.25	598.75	520.5	607.25
ENSMGAG00000001873	ENSMGAG00000001873	Uncharacterized protein	8.5	3.5	15.75	3.75	0.5	3	3
ENSMGAG00000001874	KCNJ13	potassium inwardly rectifying channel subfamily J member 13	0.75	0	0	0	0	0.25	1
ENSMGAG00000001875	RASAL3	RAS protein activator like 3 [Source:HGNC Symbol;Acc:HGNC:26129]	93	77.75	91	62.75	39.75	40.75	58.25
ENSMGAG00000001876	BBS4	Bardet-Biedl syndrome 4 [Source:HGNC Symbol;Acc:HGNC:969]	794.75	766.75	674.25	574.5	701	563.5	583.5
ENSMGAG00000001877	SLC38A7	solute carrier family 38 member 7	403.5	446	425.5	217	292.25	182	272.75
ENSMGAG00000001879	EPX	Eosinophil peroxidase	0.75	0.25	2.25	0.25	0.5	0.25	0.5
ENSMGAG00000001880	RHCE	Rh blood group CcEe antigens	75	80	74.25	89	88	84.25	82.75
ENSMGAG00000001881	LOC100542638	BCL-6 corepressor-like protein 1	182	162.5	153.75	168.25	170.25	134.75	141.75
ENSMGAG00000001882	HEMK1	HemK methyltransferase family member 1	378.5	376.75	323	269.5	298.75	277	263
ENSMGAG00000001883	ENSMGAG00000001883	Uncharacterized protein	195.75	298	216.75	199.5	197	151.75	181
ENSMGAG00000001884	ENSMGAG00000001884	Myosin motor domain-containing protein	1	0	0	0	0	0.75	0.5
ENSMGAG00000001885	UBE2R2	ubiquitin conjugating enzyme E2 R2	477.5	438.5	454.75	1752.5	710.5	504	578.5
ENSMGAG00000001886	EFHD1	EF-hand domain family member D1	245	231.25	252	189.25	168.25	124.25	134
ENSMGAG00000001887	RGS3	regulator of G protein signaling 3 [Source:HGNC Symbol;Acc:HGNC:9999]	769	694.25	648.25	490.5	928.5	268.25	610
ENSMGAG00000001888	CDC14B	cell division cycle 14B	92	95	85	141.25	112.75	106.75	122.5
ENSMGAG00000001891	CLMP	CXADR like membrane protein [Source:HGNC Symbol;Acc:HGNC:24039]	494.5	650.5	641	394	439.25	277.75	386.25
ENSMGAG00000001892	LOC100546529	muellerian-inhibiting factor-like	7.25	9.5	6.5	3.25	3.75	2.75	3
ENSMGAG00000001893	ETFDH	electron transfer flavoprotein dehydrogenase [Source:HGNC Symbol;Acc:HGNC:3483]	1249	1268	1171.75	1403	1511.25	1081.25	1193
ENSMGAG00000001894	LOC100544252	protocadherin gamma-C5-like	1624	1927.75	1723.25	882.5	1467	740.25	1232.75
ENSMGAG00000001895	TPPP	tubulin polymerization promoting protein [Source:HGNC Symbol;Acc:HGNC:24164]	299.25	339.25	294.5	146	169.75	157	245.25
ENSMGAG00000001896	TTC34	tetratricopeptide repeat domain 34 [Source:HGNC Symbol;Acc:HGNC:34297]	335	398.25	282.25	297	224	275.75	389.5
ENSMGAG00000001897	ADPGK	ADP dependent glucokinase [Source:HGNC Symbol;Acc:HGNC:25250]	424.75	428.5	430.75	433.75	431.25	316.5	359.5
ENSMGAG00000001900	MMEL1	membrane metalloendopeptidase like 1 [Source:HGNC Symbol;Acc:HGNC:14668]	787	898.75	674.5	669.5	527.5	761	876.75
ENSMGAG00000001901	NOC4L	nucleolar complex associated 4 homolog	1041.75	1024.75	984	806	872.25	830.25	787.75
ENSMGAG00000001904	PLPBP	pyridoxal phosphate binding protein [Source:HGNC Symbol;Acc:HGNC:9457]	1323.75	1156.5	1140	1002.25	974.5	1192.25	1021.75
ENSMGAG00000001905	PAK4	p21 (RAC1) activated kinase 4	1557	1437.25	1311	836.25	1315.5	848	1006.25
ENSMGAG00000001906	ENSMGAG00000001909	TSPO associated protein 1	1066.75	1065	1008.75	1096.5	1125	978	1002.75
ENSMGAG00000001907	LINGO3	leucine rich repeat and Ig domain containing 3	0.5	1.75	1.5	0.75	1.25	0.5	1.25
ENSMGAG00000001908	CNOT1	CCR4-NOT transcription complex subunit 1	5308.5	5196.25	4763.25	4555.5	4821.25	4724.25	4551.75
ENSMGAG00000001909	ENSMGAG00000001909	TSPO associated protein 1 ortholog	656.25	706.75	626.75	755.25	747.75	502	673.5
ENSMGAG00000001910	ADAM8	ADAM metallopeptidase domain 8 [Source:HGNC Symbol;Acc:HGNC:215]	27.25	32.75	20	20.75	16.25	10	15
ENSMGAG00000001911	SCLY	selenocysteine lyase	495.75	512	460.75	394	414.75	287	337.75
ENSMGAG00000001915	NEO1	neogenin 1 [Source:HGNC Symbol;Acc:HGNC:7754]	1600.25	1630.25	1506.25	1204.25	1428.75	943.25	1265.25
ENSMGAG00000001916	UTP14A	UTP14A small subunit processome component	1058	1112	1077.5	1020	1064.5	946.5	969.75
ENSMGAG00000001918	KCNMB1	potassium calcium-activated channel subfamily M regulatory beta subunit 1 [Source:HGNC Symbol;Acc:HGNC:6285]	1802.75	1862.25	2148	1768.25	1961.75	2358.5	1725.5
ENSMGAG00000001919	ACTL9	actin-like protein 9	0.25	0	0	0	0	0	0
ENSMGAG00000001920	CIAO1	cytosolic iron-sulfur assembly component 1	523.25	510.75	485.25	340.75	454.5	318	321.5
ENSMGAG00000001922	GDF5	growth differentiation factor 5 [Source:HGNC Symbol;Acc:HGNC:4220]	2.5	7.25	9	13.75	5.5	13.75	11
ENSMGAG00000001923	LOC100546378	AN1-type zinc finger protein 5-like	3953.5	4063.25	4418	3200.5	3787.5	3474.25	3161
ENSMGAG00000001924	CCDC85A	coiled-coil domain containing 85A	59.25	61.25	53.75	49	60.25	25.75	46.5
ENSMGAG00000001925	ERLIN2	ER lipid raft associated 2 [Source:HGNC Symbol;Acc:HGNC:1356]	1267.25	1243.5	1098.5	997.25	1041	820.5	961.5
ENSMGAG00000001926	LCP2	lymphocyte cytosolic protein 2 [Source:HGNC Symbol;Acc:HGNC:6529]	106	91.5	83.5	107.5	66.25	82.5	89.5
ENSMGAG00000001927	UBAP1	ubiquitin associated protein 1 [Source:HGNC Symbol;Acc:HGNC:12461]	250.5	290	236	327.25	265.25	284.25	293.25
ENSMGAG00000001929	HSPA8	heat shock protein family A (Hsp70) member 8 [Source:HGNC Symbol;Acc:HGNC:5241]	40739	31334.2	32808.8	42267.2	35709	41049.8	26681.5
ENSMGAG00000001932	ANKRA2	ankyrin repeat family A member 2 [Source:HGNC Symbol;Acc:HGNC:13208]	520.5	522.5	500.25	515.75	485.5	506.25	434.5
ENSMGAG00000001933	CISH	Cytokine-inducible SH2-containing protein	224.25	285.5	280.25	361.75	181.5	207.25	258.25
ENSMGAG00000001934	SLC35G2	solute carrier family 35 member G2	789.75	705	688	628	764.25	664.25	640.5
ENSMGAG00000001935	NPL	N-acetylneuraminate pyruvate lyase	109.75	130.25	119	145	130.75	152.25	136.75
ENSMGAG00000001936	EP400	E1A binding protein p400	1216.5	1403.75	1231.75	1204	1297	1104.25	1266.5
ENSMGAG00000001937	UTP15	UTP15 small subunit processome component [Source:HGNC Symbol;Acc:HGNC:25758]	453.75	453.75	483.5	490.75	424.25	451.25	359.25
ENSMGAG00000001938	LOC100547687	cohesin subunit SA-1	473.75	471.25	435.5	372	385.5	422.75	406.25
ENSMGAG00000001939	LOC100543634	PCTP-like protein	1.75	1.75	2.5	3	3.5	1.75	2.25
ENSMGAG00000001940	EFEMP1	EGF containing fibulin extracellular matrix protein 1	3189.5	4056	3062	5502.25	5953.75	2383	7744
ENSMGAG00000001941	MYL4	myosin light chain 4	1242.5	755.25	1465	55.75	45.5	20.5	27
ENSMGAG00000001942	ENSMGAG00000001942	Uncharacterized protein	239.75	187.5	282.75	15	20.75	312	66.5
ENSMGAG00000001943	LRRC14B	leucine rich repeat containing 14B	0	0	0	0	0	0	0
ENSMGAG00000001944	JHY	junctional cadherin complex regulator [Source:HGNC Symbol;Acc:HGNC:26288]	1098.75	1003.25	948.75	653.75	637	885.25	710.25
ENSMGAG00000001945	SLC19A1	solute carrier family 19 member 1 [Source:HGNC Symbol;Acc:HGNC:10937]	381	435.5	439.75	295.25	336.75	202.5	234.75
ENSMGAG00000001946	FNIP2	folliculin interacting protein 2 [Source:HGNC Symbol;Acc:HGNC:29280]	484	404.5	361	307.25	338.25	228.5	350.75
ENSMGAG00000001947	LOC104914671	uncharacterized LOC104914671	0	0	0	0	0	0.25	0.25
ENSMGAG00000001948	ENSMGAG00000001948	pseudogene	656.75	731.5	615.25	499.5	580.75	332.75	519.75
ENSMGAG00000001949	COL15A1	Collagen type XV alpha 1 chain	105.5	190	190	52.75	68.5	37	85
ENSMGAG00000001950	SF3A2	splicing factor 3a subunit 2	977.5	889	861.25	671	688.5	746.75	722.75
ENSMGAG00000001951	CRTAM	cytotoxic and regulatory T cell molecule [Source:HGNC Symbol;Acc:HGNC:24313]	15.75	13.75	16	29.75	6.25	9.5	12.75
ENSMGAG00000001952	PNPT1	polyribonucleotide nucleotidyltransferase 1 [Source:HGNC Symbol;Acc:HGNC:23166]	477.5	476.5	464	518	445.5	451.25	481.5
ENSMGAG00000001953	ZDHHC9	zinc finger DHHC-type containing 9	2101.5	1925.5	1860.25	1617	1903.75	1821.5	1817.75
ENSMGAG00000001954	ENSMGAG00000001954	Uncharacterized protein	2.25	2	1.25	0.25	0.25	0.25	0
ENSMGAG00000001956	FAM83C	family with sequence similarity 83 member C [Source:HGNC Symbol;Acc:HGNC:16121]	366	400	390	344	359.5	476	294.25
ENSMGAG00000001957	SLC9A5	solute carrier family 9 member A5	78.75	100.5	70	67.75	60.75	51	77.75
ENSMGAG00000001958	PUS1	pseudouridine synthase 1	1149	1077.25	1070.5	877.5	1181	910.5	1122.25
ENSMGAG00000001959	LOC100541714	heme-binding protein 2-like	14.25	13.5	6	150.75	36.75	370.25	185.5
ENSMGAG00000001962	CDC27	cell division cycle 27	1108.5	1153	1066.25	1383.5	1083.75	1028.25	984.5
ENSMGAG00000001963	TACC1	Transforming acidic coiled-coil containing protein 1	655.75	863.5	770.25	892.75	852.75	632	871.5
ENSMGAG00000001964	TMEM50A	transmembrane protein 50A	1153.75	1004.25	994.5	1094.75	952.5	1016.75	798.25
ENSMGAG00000001965	EIF6	eukaryotic translation initiation factor 6	593.5	600.5	558.75	553.5	631.75	461	457.5
ENSMGAG00000001967	COL18A1	collagen type XVIII alpha 1 chain	6908.75	6693.75	5921.75	1792.75	2654.75	1134.5	1896.75
ENSMGAG00000001969	UBASH3B	ubiquitin associated and SH3 domain containing B [Source:HGNC Symbol;Acc:HGNC:29884]	245.25	194	227.75	88	222.5	79.75	234.5
ENSMGAG00000001972	CRABP2	cellular retinoic acid binding protein 2 [Source:HGNC Symbol;Acc:HGNC:2339]	1163.5	909.25	939.75	250.5	698.5	405.75	431.25
ENSMGAG00000001973	ULK1	unc-51 like autophagy activating kinase 1	1068.5	1088	1013.5	840.5	1041.25	681.25	1070.75
ENSMGAG00000001976	ZBTB37	zinc finger and BTB domain containing 37	269	382.25	263	320.75	275.5	207.5	362.25
ENSMGAG00000001978	LOC723980	avidin	1086	6370	3357.5	64165.8	67677.2	69187.5	67767
ENSMGAG00000001979	SASH3	SAM and SH3 domain containing 3	66	69.75	62.25	54.75	55.5	35.25	52.75
ENSMGAG00000001981	OAZ1	ornithine decarboxylase antizyme 1	8928.75	9205.25	9781.75	8234.5	8468	10394	7422.75
ENSMGAG00000001982	ENSMGAG00000001982	Uncharacterized protein	229.25	362.75	402.25	978.75	410	944.75	798.75
ENSMGAG00000001983	LOC100551127	transcription factor HES-5-like	21.75	19.5	21.5	8.25	13.75	14.25	16
ENSMGAG00000001985	MMP24	matrix metallopeptidase 24 [Source:HGNC Symbol;Acc:HGNC:7172]	168.75	181.5	157.5	161.75	166.5	167.25	154.5
ENSMGAG00000001986	HSF5	Heat shock transcription factor 5	5.75	3	4.5	2.25	2.5	1.75	2.5
ENSMGAG00000001987	ARHGEF39	Rho guanine nucleotide exchange factor 39 [Source:HGNC Symbol;Acc:HGNC:25909]	21.25	14.5	20.75	2.25	4.5	6.5	3.5
ENSMGAG00000001988	LUZP2	leucine zipper protein 2	43.75	22	27.5	54.5	51.5	38.75	19.25
ENSMGAG00000001990	PNPLA7	patatin like phospholipase domain containing 7	1238.75	1389.5	1299	1633	1635	1461.75	1433.25
ENSMGAG00000001991	SERPINC1	serpin family C member 1	2715.25	2585.25	2447.5	1674.75	2123.25	2039	2105.25
ENSMGAG00000001992	MTMR4	myotubularin related protein 4	1429	1538.75	1372.25	1025.75	1303.25	946	1207.25
ENSMGAG00000001994	CREB3	cAMP responsive element binding protein 3 [Source:HGNC Symbol;Acc:HGNC:2347]	3263	4052	3711.75	7738.75	7921	7296.25	5552
ENSMGAG00000001995	MAF1	MAF1 homolog, negative regulator of RNA polymerase III	1161.5	1159	991	980	1160.25	851.25	1122
ENSMGAG00000001996	XPNPEP2	X-prolyl aminopeptidase 2	3.75	5.5	4.75	2	3.25	2	0.75
ENSMGAG00000001997	SETD6	SET domain containing 6	228.25	280.75	202.25	217	239.75	168	213
ENSMGAG00000001999	RAPGEF2	Rap guanine nucleotide exchange factor 2 [Source:HGNC Symbol;Acc:HGNC:16854]	589.25	714.5	620.75	809.5	662.75	661.75	711.5
ENSMGAG00000002000	LOC100551279	uncharacterized LOC100551279	0	0	0	0	0	0	0
ENSMGAG00000002002	FCHSD1	FCH and double SH3 domains 1	264	242.25	240.25	323.75	205.75	154.25	207.5
ENSMGAG00000002004	FGFR1	fibroblast growth factor receptor 1 [Source:HGNC Symbol;Acc:HGNC:3688]	4202.75	5497.75	4859.5	6323.75	5189	4372.25	4187.25
ENSMGAG00000002005	GAS2	growth arrest specific 2 [Source:HGNC Symbol;Acc:HGNC:4167]	47	51.25	43.25	10.5	9.75	11	16.5
ENSMGAG00000002006	FAM219A	Family with sequence similarity 219 member A	158.5	201	156	168	120.5	86.5	116.75
ENSMGAG00000002010	ENSMGAG00000002010	Uncharacterized protein	812.25	866	725.75	550.5	743.25	505.25	656.25
ENSMGAG00000002011	SORL1	sortilin related receptor 1 [Source:HGNC Symbol;Acc:HGNC:11185]	6316.25	7348.25	6072.75	9176	9448.25	6743.5	10648
ENSMGAG00000002012	LETM2	leucine zipper and EF-hand containing transmembrane protein 2 [Source:HGNC Symbol;Acc:HGNC:14648]	861	1065	922.75	1529.5	893	1061	855
ENSMGAG00000002013	SLC17A6	solute carrier family 17 member 6 [Source:HGNC Symbol;Acc:HGNC:16703]	2.5	4	0.25	0	0	0.25	0
ENSMGAG00000002014	POLK	DNA polymerase kappa	91.75	101	89.25	96.25	100.5	71.75	89.75
ENSMGAG00000002015	FOXI1	forkhead box I1 [Source:HGNC Symbol;Acc:HGNC:3815]	415.25	272.75	319.25	625.75	399.75	233.25	197.5
ENSMGAG00000002016	CSRP1	cysteine and glycine rich protein 1 [Source:HGNC Symbol;Acc:HGNC:2469]	22506	27570	30125	17128.8	23092.2	16350	18831.2
ENSMGAG00000002017	RSRP1	arginine and serine rich protein 1	7734.75	7148.5	6734	7745.75	5956.75	8359.75	7202.25
ENSMGAG00000002018	OCRL	OCRL, inositol polyphosphate-5-phosphatase	1673	2086	1761.25	1971.25	2344	1705.75	1904
ENSMGAG00000002019	SYF2	SYF2 pre-mRNA splicing factor	852	769.5	767	958	959.25	1037	794.5
ENSMGAG00000002020	ENSMGAG00000002020	Uncharacterized protein	712.75	587.25	526.5	307.25	335.25	544	411
ENSMGAG00000002021	PPP4R3B	protein phosphatase 4 regulatory subunit 3B	4068.5	3721.5	3584	3641.25	3814.75	4006.5	3617.75
ENSMGAG00000002022	PANK4	pantothenate kinase 4	557.75	552	524.75	545.25	542.75	487.25	510.25
ENSMGAG00000002023	DOCK2	dedicator of cytokinesis 2 [Source:HGNC Symbol;Acc:HGNC:2988]	114.25	94	100	108	82	77.75	74.5
ENSMGAG00000002025	KAT7	lysine acetyltransferase 7 [Source:HGNC Symbol;Acc:HGNC:17016]	1882.75	1786.5	1771	1622.25	1834.25	1834.25	1621.5
ENSMGAG00000002027	PKP1	plakophilin 1 [Source:HGNC Symbol;Acc:HGNC:9023]	240.25	284	263.75	104.75	259	143.25	148.25
ENSMGAG00000002028	NSD3	nuclear receptor binding SET domain protein 3 [Source:HGNC Symbol;Acc:HGNC:12767]	1298.5	1449.75	1276.25	1845	1243	1638.25	1393.25
ENSMGAG00000002030	LIMK1	LIM domain kinase 1	100.5	120.75	107.25	83	78.5	54.25	76
ENSMGAG00000002031	ERLIN1	ER lipid raft associated 1 [Source:HGNC Symbol;Acc:HGNC:16947]	300.25	297	270.75	274.75	301	325	275
ENSMGAG00000002032	PLEKHJ1	pleckstrin homology domain containing J1	270.25	306.75	281.5	282.25	282.75	259	248.25
ENSMGAG00000002033	RC3H1	ring finger and CCCH-type domains 1 [Source:HGNC Symbol;Acc:HGNC:29434]	388	435.75	349.5	508.75	448.5	281.5	457
ENSMGAG00000002034	RELL2	RELT like 2	0	0	0	0.25	0	0	0.25
ENSMGAG00000002035	RUNX3	runt related transcription factor 3	113.25	142.75	123.25	83.25	120.25	79.5	106.75
ENSMGAG00000002036	TLN1	talin 1 [Source:HGNC Symbol;Acc:HGNC:11845]	9921	13074	12276.5	11951.8	12274.5	9488.5	10475.2
ENSMGAG00000002037	DOT1L	DOT1 like histone lysine methyltransferase	972.75	928.75	899.25	682.75	764.25	520.25	795.5
ENSMGAG00000002038	AARS	alanyl-tRNA synthetase 1	2020.75	2011.75	1975.75	2050.75	2168.5	1871.5	1787
ENSMGAG00000002039	CKS2	CDC28 protein kinase regulatory subunit 2 [Source:HGNC Symbol;Acc:HGNC:2000]	1.75	1.75	0.25	0.5	0.75	0	0.25
ENSMGAG00000002040	SCO1	synthesis of cytochrome C oxidase 1 [Source:HGNC Symbol;Acc:HGNC:10603]	333	313.5	314	349	374.25	334.75	288
ENSMGAG00000002041	CLIC4	chloride intracellular channel 4	1235.5	1138	1255.5	930	1056.75	1039.75	948.25
ENSMGAG00000002044	ENSMGAG00000002044	Uncharacterized protein	33.25	29.75	25.75	9.25	12.25	11.25	16.5
ENSMGAG00000002045	HCN4	hyperpolarization activated cyclic nucleotide gated potassium channel 4 [Source:HGNC Symbol;Acc:HGNC:16882]	58	68.5	67	67	32.25	64.5	75
ENSMGAG00000002046	MMP17	matrix metallopeptidase 17	2627.5	3280.75	2585	3086	2920.25	3475.75	2956.25
ENSMGAG00000002047	SREK1	splicing regulatory glutamic acid and lysine rich protein 1 [Source:HGNC Symbol;Acc:HGNC:17882]	121.5	128	124.5	144.75	127.75	116.25	130.5
ENSMGAG00000002048	FAM117A	family with sequence similarity 117 member A [Source:HGNC Symbol;Acc:HGNC:24179]	1802	1893.25	1763.75	1851	1922.5	1507.25	1658.75
ENSMGAG00000002050	TGFBR1	transforming growth factor beta receptor 1	793	883.25	743.25	1469.25	1119.5	1274.25	972.5
ENSMGAG00000002052	MAP1LC3A	microtubule associated protein 1 light chain 3 alpha [Source:HGNC Symbol;Acc:HGNC:6838]	446.25	460.75	401.5	618.5	664.5	489.75	503.25
ENSMGAG00000002053	RAD17	RAD17 checkpoint clamp loader component [Source:HGNC Symbol;Acc:HGNC:9807]	286	318.25	279	341	283	270.5	308.75
ENSMGAG00000002054	ANO5	anoctamin 5 [Source:HGNC Symbol;Acc:HGNC:27337]	794.25	908.25	827.75	712.5	789	513.75	697.25
ENSMGAG00000002055	HDAC3	histone deacetylase 3	817.75	835.5	836	849	781	736.5	670
ENSMGAG00000002056	TMEM9	transmembrane protein 9	281.5	233.75	240	142	252.25	156.5	189.25
ENSMGAG00000002057	DYNLRB1	dynein light chain roadblock-type 1 [Source:HGNC Symbol;Acc:HGNC:15468]	905.75	908.5	946.75	1028.25	1004.25	1232	844.5
ENSMGAG00000002058	DNAAF5	Dynein axonemal assembly factor 5	942	838.25	774.75	765	721.5	862.75	730.5
ENSMGAG00000002059	SEPTIN4	septin 4	17.75	16.5	19.75	14.5	23.75	16.5	28
ENSMGAG00000002060	SRRM1	serine and arginine repetitive matrix 1	5338.5	5239	4853.25	5278.75	4215.5	3720.75	4072.5
ENSMGAG00000002062	PCCB	propionyl-CoA carboxylase subunit beta [Source:HGNC Symbol;Acc:HGNC:8654]	1449.75	1372.5	1347.75	1166.75	1197.5	1147.5	947.5
ENSMGAG00000002063	SLC35B1	solute carrier family 35 member B1 [Source:HGNC Symbol;Acc:HGNC:20798]	1338.5	1208.25	1139.5	1974.25	1649.5	1364.75	1280.75
ENSMGAG00000002064	CFAP36	Cilia- and flagella-associated protein 36 (Coiled-coil domain-containing protein 104)	948.75	904.5	879.25	1007	1000.5	1479.25	891.5
ENSMGAG00000002065	ITCH	itchy E3 ubiquitin protein ligase [Source:HGNC Symbol;Acc:HGNC:13890]	997	1135.75	1040.5	1441.5	1191	1162.5	1117
ENSMGAG00000002066	LOC100550363	alpha-1,3-mannosyl-glycoprotein 4-beta-N-acetylglucosaminyltransferase C	63.75	61.25	67.25	20.25	34	41.5	43.75
ENSMGAG00000002067	LOC100551434	transmembrane protein 183A-like	497.75	490.25	470.75	520.25	479.5	505	405.75
ENSMGAG00000002068	GLP2R	glucagon like peptide 2 receptor	6.5	8.75	6	7.25	6.5	3	4.5
ENSMGAG00000002069	RECK	reversion inducing cysteine rich protein with kazal motifs	280	315.75	317.25	263.75	259	238	270.75
ENSMGAG00000002070	REC114	REC114 meiotic recombination protein [Source:HGNC Symbol;Acc:HGNC:25065]	6.75	6.75	7.5	9.5	5.75	8.25	6.5
ENSMGAG00000002071	PLPP5	phospholipid phosphatase 5 [Source:HGNC Symbol;Acc:HGNC:25026]	411.25	387.5	349.75	227.25	262.25	293.5	266
ENSMGAG00000002072	LOC100538845	rab GTPase-activating protein 1-like, isoform 10	477.75	508.5	465.75	569.25	547	427.75	513.75
ENSMGAG00000002073	SUN1	Sad1 and UNC84 domain containing 1	388.5	375.25	386.25	409.25	429.75	316.75	435.5
ENSMGAG00000002074	GRIK4	glutamate ionotropic receptor kainate type subunit 4 [Source:HGNC Symbol;Acc:HGNC:4582]	17.25	12	17.5	7.75	10.5	6.75	9.5
ENSMGAG00000002075	CWF19L1	CWF19 like cell cycle control factor 1 [Source:HGNC Symbol;Acc:HGNC:25613]	578	592.5	579.75	624.25	544.75	587.75	525.5
ENSMGAG00000002077	DDHD2	DDHD domain containing 2 [Source:HGNC Symbol;Acc:HGNC:29106]	1121.75	1505.5	1131.25	807.25	956	801	1016.5
ENSMGAG00000002080	MAP2K4	mitogen-activated protein kinase kinase 4	737.25	789	749.5	690	655.5	678	606.5
ENSMGAG00000002081	LOC100550646	vasoactive intestinal polypeptide receptor-like	0.25	0	0	1	0	0.25	0
ENSMGAG00000002082	INSYN2B	inhibitory synaptic factor family member 2B [Source:HGNC Symbol;Acc:HGNC:37271]	1.5	3	3	0.75	1.25	1.75	2
ENSMGAG00000002083	NPTN	neuroplastin [Source:HGNC Symbol;Acc:HGNC:17867]	1822.75	1870	1861	2416.5	2447.5	1604.25	1890
ENSMGAG00000002086	ENSMGAG00000002086	lncRNA	3385.75	3816	3373	508.25	727	318	484.5
ENSMGAG00000002088	SPDL1	spindle apparatus coiled-coil protein 1 [Source:HGNC Symbol;Acc:HGNC:26010]	452.25	358.5	397.25	364	307.5	352.75	287.25
ENSMGAG00000002090	LOC100538447	liprin-alpha-4-like	12	17	14	10.5	14.5	8	13.75
ENSMGAG00000002091	AP3D1	adaptor related protein complex 3 delta 1 subunit	2087.25	2187.25	2015.25	2307.25	2111.25	1901	1967.75
ENSMGAG00000002092	NELL1	neural EGFL like 1 [Source:HGNC Symbol;Acc:HGNC:7750]	274	615	468.5	1321.75	774.75	1075.75	873.75
ENSMGAG00000002093	DPH7	Diphthamide biosynthesis 7	635.75	603	653	609	546	523	581.25
ENSMGAG00000002094	ercc6l	ERCC excision repair 6 like, spindle assembly checkpoint helicase	242.25	146	168	67.5	55.25	59	41.5
ENSMGAG00000002095	CCDC183	coiled-coil domain containing 183	13.25	15.25	10.75	23.75	14	14.25	12.5
ENSMGAG00000002096	NHSL2	NHS like 2	366.25	439	381.75	261.5	310.75	226.25	283.5
ENSMGAG00000002098	MYOCD	myocardin	438.5	616.5	627	343.5	648	281.5	422
ENSMGAG00000002099	SPOP	speckle type BTB/POZ protein [Source:HGNC Symbol;Acc:HGNC:11254]	1076	1070.5	993.25	1181.75	1088.5	1111.5	981.5
ENSMGAG00000002100	NCMAP	non-compact myelin associated protein	51	44.5	49.5	35	41	34.5	42
ENSMGAG00000002102	MSL2	male-specific lethal 2 homolog (Drosophila)	304	285.5	296.5	359	323	296.75	305.75
ENSMGAG00000002103	NCKAP1L	NCK associated protein 1 like	494.75	508.5	405.75	277.5	313.5	203.25	386.5
ENSMGAG00000002105	TRNAU1AP	tRNA selenocysteine 1 associated protein 1	66	56.75	77.5	57.5	55	46.75	46.25
ENSMGAG00000002106	ANAPC2	anaphase promoting complex subunit 2	3258	3229.5	2776.25	2091.5	2850.75	2193.25	3045
ENSMGAG00000002107	CCDC88A	coiled-coil domain containing 88A	258	273	250.25	197.5	202.75	164.5	234
ENSMGAG00000002109	LOC100547843	serine/threonine-protein phosphatase 2A regulatory subunit B'' subunit alpha	144	202.5	187.25	273.75	223.25	285.25	220.5
ENSMGAG00000002110	CDHR1	cadherin related family member 1 [Source:HGNC Symbol;Acc:HGNC:14550]	0	0	0	0	0	0	0
ENSMGAG00000002111	CD276	CD276 molecule [Source:HGNC Symbol;Acc:HGNC:19137]	671	680.5	656.5	462.5	519.25	348	445.5
ENSMGAG00000002112	SLC6A5	solute carrier family 6 member 5 [Source:HGNC Symbol;Acc:HGNC:11051]	0	2	1.5	1	0.75	0.75	1
ENSMGAG00000002113	SLIT3	slit guidance ligand 3 [Source:HGNC Symbol;Acc:HGNC:11087]	725.5	836.75	737.5	301.75	400.5	262.25	402.25
ENSMGAG00000002114	KCTD19	Potassium channel tetramerization domain containing 19	50	53	22.5	3.5	2.25	16.75	11.5
ENSMGAG00000002115	FSTL5	follistatin like 5 [Source:HGNC Symbol;Acc:HGNC:21386]	0	0.5	0.75	0.75	0.25	0	0.25
ENSMGAG00000002116	LOC100550056	probable glutamate receptor	67	84.75	71.25	35	36.75	42.25	53.25
ENSMGAG00000002117	CACYBP	calcyclin binding protein	403	363.25	358	495.5	411.75	459.75	346
ENSMGAG00000002118	ENSMGAG00000002118	Uncharacterized protein	14	16	11.75	25.25	15	6.75	5.25
ENSMGAG00000002119	SBDS	SBDS ribosome maturation factor	1901.5	1965.75	1877.25	2275.25	2205	2272.25	1868
ENSMGAG00000002121	LOC100551074	discoidin domain-containing receptor 2-like	2714.5	2986.75	2540.25	2488.75	3753.25	1986	2580.5
ENSMGAG00000002122	NDUFA10	NADH:ubiquinone oxidoreductase subunit A10 [Source:HGNC Symbol;Acc:HGNC:7684]	2310.75	2233.75	2340	2483.5	2437	2087.75	1777.25
ENSMGAG00000002123	LOC100550412	connective tissue growth factor-like	59	65.25	57.5	45.25	73	42.25	82.5
ENSMGAG00000002125	LSM1	LSM1 homolog, mRNA degradation associated [Source:HGNC Symbol;Acc:HGNC:20472]	277.75	247.25	260.75	224.5	252.5	218.25	186.5
ENSMGAG00000002126	ADNP2	ADNP homeobox 2 [Source:HGNC Symbol;Acc:HGNC:23803]	1202.25	1125.25	1090.75	1159	1011	1029.5	989.5
ENSMGAG00000002127	MRPS14	mitochondrial ribosomal protein S14 [Source:HGNC Symbol;Acc:HGNC:14049]	1353	1293.25	1331	1460	1498.75	1351.25	1187.5
ENSMGAG00000002128	LOC100545583	aryl hydrocarbon receptor-like	21.5	17.75	12.25	10.75	7	13.25	6.75
ENSMGAG00000002129	RBFA	ribosome binding factor A (putative)	541.25	476.25	489.5	573.75	531.75	656.25	531
ENSMGAG00000002130	STAR	steroidogenic acute regulatory protein [Source:HGNC Symbol;Acc:HGNC:11359]	13	21.75	11	19.75	15.75	8.5	15.5
ENSMGAG00000002131	LOC100549639	uncharacterized LOC100549639	1018.5	1016	982	1064.5	1242.5	1149	953.25
ENSMGAG00000002132	TNN	tenascin N	0.75	3	0.75	1.25	1.25	0.5	1.25
ENSMGAG00000002133	NAF1	nuclear assembly factor 1 ribonucleoprotein [Source:HGNC Symbol;Acc:HGNC:25126]	335.5	281	250	333.25	276.25	444.25	302.5
ENSMGAG00000002134	ELAC2	elaC ribonuclease Z 2	839.5	806.5	831.75	1057	917.75	838.5	755.75
ENSMGAG00000002136	NGFR	nerve growth factor receptor [Source:HGNC Symbol;Acc:HGNC:7809]	293.5	163.5	223.75	36.5	109.5	33.5	31.5
ENSMGAG00000002137	LOC100545280	zona pellucida sperm-binding protein 3-like	1.75	0.25	1.25	0.75	0.5	0.5	0.5
ENSMGAG00000002138	HDAC4	histone deacetylase 4 [Source:HGNC Symbol;Acc:HGNC:14063]	431.25	527	454.5	399.5	471	297.25	467.25
ENSMGAG00000002139	LOC100544543	glyoxylate reductase/hydroxypyruvate reductase-like	737.75	680.5	678.25	612.25	603	550.75	556.25
ENSMGAG00000002140	LRIT1	leucine rich repeat, Ig-like and transmembrane domains 1 [Source:HGNC Symbol;Acc:HGNC:23404]	0	0	0	0	0	0	0.25
ENSMGAG00000002141	NPY1R	neuropeptide Y receptor Y1 [Source:HGNC Symbol;Acc:HGNC:7956]	0	0.5	0	0	0	3	0.75
ENSMGAG00000002142	DBR1	debranching RNA lariats 1	579	560.75	533.75	543.25	509.25	575.25	471.5
ENSMGAG00000002143	AHCY	adenosylhomocysteinase [Source:HGNC Symbol;Acc:HGNC:343]	2625	2235.75	2385	1634	1838.5	1630.25	1347.25
ENSMGAG00000002145	LOC104912982	uncharacterized LOC104912982	837	843.75	776.25	878.75	768.25	681.5	749.75
ENSMGAG00000002147	TMA16	translation machinery associated 16 homolog [Source:HGNC Symbol;Acc:HGNC:25638]	494	460	492.75	634	493.5	637.75	420.5
ENSMGAG00000002148	ASH2L	ASH2 like, histone lysine methyltransferase complex subunit [Source:HGNC Symbol;Acc:HGNC:744]	944.5	953.75	923	959.75	872.5	878	836.5
ENSMGAG00000002149	PLCH2	phospholipase C eta 2 [Source:HGNC Symbol;Acc:HGNC:29037]	239.25	204.25	184.5	103.5	137	122.5	128
ENSMGAG00000002151	CLIC2	chloride intracellular channel protein 2	304.75	361.25	326.25	278	310.75	192	238.25
ENSMGAG00000002153	TXNL4A	thioredoxin like 4A [Source:HGNC Symbol;Acc:HGNC:30551]	375.75	319.75	348.25	381.25	315.25	383.75	299.75
ENSMGAG00000002154	MARCHF1	membrane associated ring-CH-type finger 1 [Source:HGNC Symbol;Acc:HGNC:26077]	42.75	38.75	28	27.75	25.5	30	28.5
ENSMGAG00000002155	CARMIL2	capping protein regulator and myosin 1 linker 2	41.25	48.75	52	53.75	27.5	22.75	40
ENSMGAG00000002156	RGR	retinal G protein coupled receptor [Source:HGNC Symbol;Acc:HGNC:9990]	0	0	0	0	0	0	0
ENSMGAG00000002159	ENSMGAG00000002159	Uncharacterized protein	46.75	41.5	41.25	30.25	37	27.5	25.25
ENSMGAG00000002160	EPB41	erythrocyte membrane protein band 4.1	956.75	873	825.5	634.25	748	448.25	634.5
ENSMGAG00000002161	LOC100546123	G protein-activated inward rectifier potassium channel 1-like	7.75	9.5	5.75	17	7.25	9.5	8
ENSMGAG00000002162	ARMC8	Armadillo repeat-containing protein 8	880.5	901	813	923	800.25	988.5	779
ENSMGAG00000002164	SLC66A2	solute carrier family 66 member 2 [Source:HGNC Symbol;Acc:HGNC:26188]	419.75	384	368.75	440.25	422.5	346.25	385.75
ENSMGAG00000002165	INSYN1	inhibitory synaptic factor 1 [Source:HGNC Symbol;Acc:HGNC:33753]	19	21.75	18.5	62	61	21.75	42.25
ENSMGAG00000002166	ASIP	agouti signaling protein [Source:HGNC Symbol;Acc:HGNC:745]	1	0.75	0.5	0	0	1.5	0
ENSMGAG00000002167	TMEM192	transmembrane protein 192 [Source:HGNC Symbol;Acc:HGNC:26775]	153	150.25	143	146.25	153.5	130.5	136
ENSMGAG00000002168	GPR146	G protein-coupled receptor 146	70.75	61	65.5	129	91.5	100.5	89
ENSMGAG00000002171	CHAT	choline O-acetyltransferase [Source:HGNC Symbol;Acc:HGNC:1912]	0	0	0	0.25	0.25	0.25	0
ENSMGAG00000002172	GET4	golgi to ER traffic protein 4	1339.5	1310.75	1289.75	1554.25	1439.5	1528.75	1168
ENSMGAG00000002173	FOXO4	Forkhead box O4	325.5	372.75	322.5	478	440.75	353.75	378.75
ENSMGAG00000002174	EIF2S2	eukaryotic translation initiation factor 2 subunit beta [Source:HGNC Symbol;Acc:HGNC:3266]	2165.25	2019.25	2070	2260.25	2090.25	2263	1697.5
ENSMGAG00000002175	LOC100547297	MAP kinase-interacting serine/threonine-protein kinase 2-like	316.25	297.25	276.25	227.25	287.5	181.25	263
ENSMGAG00000002176	TYW1	S-adenosyl-L-methionine-dependent tRNA 4-demethylwyosine synthase TYW1	161	168.25	155.5	165.75	164.75	144.5	161
ENSMGAG00000002177	BTBD2	BTB domain containing 2	681	581.5	599.75	454.75	652.75	447.25	592.5
ENSMGAG00000002179	MPP3	membrane palmitoylated protein 3 [Source:HGNC Symbol;Acc:HGNC:7221]	98.75	108.75	100.5	87.25	78.5	79.75	79.25
ENSMGAG00000002181	LOXL1	lysyl oxidase like 1 [Source:HGNC Symbol;Acc:HGNC:6665]	889.75	996	896	451.25	614.25	356.75	538.5
ENSMGAG00000002182	KLHL2	kelch like family member 2 [Source:HGNC Symbol;Acc:HGNC:6353]	463.25	447.75	439	534.75	436	532.25	423
ENSMGAG00000002183	TNR	tenascin R	133	6.75	61.75	123.75	9.75	186.75	8
ENSMGAG00000002184	PEX10	peroxisomal biogenesis factor 10	653.75	538.5	512.75	533.75	511.25	495.5	405.5
ENSMGAG00000002185	KCNG2	potassium voltage-gated channel modifier subfamily G member 2 [Source:HGNC Symbol;Acc:HGNC:6249]	173.75	222	180.5	296.5	106.75	185.5	189.25
ENSMGAG00000002186	SC5D	sterol-C5-desaturase [Source:HGNC Symbol;Acc:HGNC:10547]	528.75	763.5	684.75	588	800.75	450	635
ENSMGAG00000002190	TECTA	tectorin alpha [Source:HGNC Symbol;Acc:HGNC:11720]	48	64.75	40.5	25.5	48.5	19.75	49.75
ENSMGAG00000002191	SFSWAP	splicing factor SWAP	2345.5	2563.5	2220	2565.5	2204.75	2119	2139
ENSMGAG00000002193	CTDP1	CTD phosphatase subunit 1 [Source:HGNC Symbol;Acc:HGNC:2498]	757	706.25	658.5	918.25	793.25	676	601.5
ENSMGAG00000002194	C15orf39	chromosome 15 open reading frame 39 [Source:HGNC Symbol;Acc:HGNC:24497]	1659	2024.25	1784.5	1602.5	1581	1242.75	1490
ENSMGAG00000002195	PRMT3	protein arginine methyltransferase 3 [Source:HGNC Symbol;Acc:HGNC:30163]	291.5	236.75	273.75	224.25	257.5	240.5	218.25
ENSMGAG00000002196	RER1	retention in endoplasmic reticulum sorting receptor 1	1031.5	955	963	1284	1144.75	1143	952
ENSMGAG00000002197	ADAP1	ArfGAP with dual PH domains 1	175.75	372	216	746.75	516.75	606.25	406.25
ENSMGAG00000002199	CSNK1G2	casein kinase 1 gamma 2	814.25	746.5	698.25	712.25	751.5	603.5	669.25
ENSMGAG00000002200	CTCF	CCCTC-binding factor	1078.25	1035.5	1030.25	960.75	1058.75	835	919
ENSMGAG00000002202	ENSMGAG00000002202	Tubulin beta chain	31717.8	23709.5	24368	18670.2	15307.2	21098.5	14324.2
ENSMGAG00000002203	SLC7A3	solute carrier family 7 member 3	590.25	669.75	588	706.25	587.25	360.5	358.5
ENSMGAG00000002204	SKI	SKI proto-oncogene	149	225.75	182.75	172.25	185.5	137.5	223.5
ENSMGAG00000002205	NME9	NME/NM23 family member 9	190.75	156.5	152.25	93.5	118	129.5	144
ENSMGAG00000002206	OGDHL	oxoglutarate dehydrogenase L [Source:HGNC Symbol;Acc:HGNC:25590]	10	5.25	11.75	8	9	10	12
ENSMGAG00000002207	NODAL	nodal growth differentiation factor	0	0	0	0	0	0	0
ENSMGAG00000002208	MSMO1	methylsterol monooxygenase 1 [Source:HGNC Symbol;Acc:HGNC:10545]	979.75	1209.5	1144.5	1451.5	1904.75	1228.75	1176
ENSMGAG00000002209	VPS8	VPS8 subunit of CORVET complex	961.25	1021.5	998.5	927	992	1009.25	976.25
ENSMGAG00000002210	ENSMGAG00000002210	Uncharacterized protein	10994.2	11151.5	9076.75	7075.75	7649.5	8696	9216.75
ENSMGAG00000002212	MYOG	myogenin [Source:HGNC Symbol;Acc:HGNC:7612]	0	0	0	0	0	0	0
ENSMGAG00000002214	RALY	RALY heterogeneous nuclear ribonucleoprotein [Source:HGNC Symbol;Acc:HGNC:15921]	129.75	161.25	142.75	154.5	186	178.5	234.5
ENSMGAG00000002215	NFATC1	nuclear factor of activated T cells 1 [Source:HGNC Symbol;Acc:HGNC:7775]	94	127	97.5	73	84.75	66.75	97.5
ENSMGAG00000002216	EIF4EBP1	Eukaryotic translation initiation factor 4E binding protein 1	2157	1808.75	1978.5	2960.75	2538	2613.75	1874
ENSMGAG00000002217	LOC104913658	ectonucleoside triphosphate diphosphohydrolase 2-like	221.25	234.75	207	174.75	242.75	149	209.5
ENSMGAG00000002218	TWIST2	twist family bHLH transcription factor 2 [Source:HGNC Symbol;Acc:HGNC:20670]	73.5	78.25	90.25	37.5	53.25	51.25	43.75
ENSMGAG00000002219	MANF	mesencephalic astrocyte derived neurotrophic factor [Source:HGNC Symbol;Acc:HGNC:15461]	1492.5	1473.5	1486	2723.25	2509	2193.25	2117.5
ENSMGAG00000002220	ABHD11	Abhydrolase domain containing 11	478	500.25	431.25	450.5	427.5	355.25	389
ENSMGAG00000002221	ADRB3	adrenoceptor beta 3 [Source:NCBI gene (formerly Entrezgene);Acc:100379211]	0	0.75	0	0.5	0	0.75	1.25
ENSMGAG00000002222	ENSMGAG00000002222	Uncharacterized protein	80.5	92.75	88	249	407.75	124	238.5
ENSMGAG00000002223	AHCYL1	adenosylhomocysteinase like 1 [Source:HGNC Symbol;Acc:HGNC:344]	2739.25	3440.25	2882.75	4954.5	3346.5	3808.5	3313
ENSMGAG00000002224	CPE	carboxypeptidase E [Source:HGNC Symbol;Acc:HGNC:2303]	325.25	278.75	296.75	97.5	116.5	108	88.5
ENSMGAG00000002225	TBCEL	tubulin folding cofactor E like	416.25	398.5	344.5	289.75	318.25	339.5	357.5
ENSMGAG00000002227	ASB1	ankyrin repeat and SOCS box containing 1 [Source:HGNC Symbol;Acc:HGNC:16011]	1258.5	1443.25	1454.75	1532	1667.25	1343.5	1357.75
ENSMGAG00000002228	LOC100538756	protein kinase C zeta type	802.5	812.25	711.25	801.5	777.5	865	779.25
ENSMGAG00000002230	GPER1	G protein-coupled estrogen receptor 1	1.5	3	2.75	1	1.25	0.75	2
ENSMGAG00000002231	ZFAND2A	zinc finger AN1-type containing 2A	104.5	117.75	99.75	211	164	174	156
ENSMGAG00000002232	GHRH	growth hormone releasing hormone	0	0	0	0.5	0.25	0.25	1.25
ENSMGAG00000002233	LOC100550104	prolactin-releasing peptide receptor-like	0	0	0.75	0	0	0.25	0.75
ENSMGAG00000002234	ARHGEF12	Rho guanine nucleotide exchange factor 12 [Source:HGNC Symbol;Acc:HGNC:14193]	2044	2379.5	2167	2002.5	2284.75	1693.75	2089.25
ENSMGAG00000002235	ADGRD1	ADGRD1 adhesion G protein-coupled receptor D1 [ Meleagris gallopavo (turkey) ]	3113.75	2823	2942.5	2554.25	2605	2633.5	1985.75
ENSMGAG00000002236	TRAF3IP1	TRAF3 interacting protein 1 [Source:HGNC Symbol;Acc:HGNC:17861]	2210.75	2033.5	1883	1622.5	1722	2680	1922.5
ENSMGAG00000002239	LOC100546724	cytochrome P450 2K4-like	107.25	60	69	9.25	15.75	10.5	18.25
ENSMGAG00000002240	DCAF1	DDB1 and CUL4 associated factor 1	1261	1243	1158.5	1317	1209.75	1188.25	1153.75
ENSMGAG00000002241	TLL1	tolloid like 1 [Source:HGNC Symbol;Acc:HGNC:11843]	175.5	215.75	241	65.25	124.25	59	92.5
ENSMGAG00000002242	PPCDC	phosphopantothenoylcysteine decarboxylase [Source:HGNC Symbol;Acc:HGNC:28107]	321.75	276.25	242.25	153.5	176	202.25	177
ENSMGAG00000002244	GINS4	GINS complex subunit 4 [Source:HGNC Symbol;Acc:HGNC:28226]	529.75	554.25	552.5	614.75	600.25	491	469.75
ENSMGAG00000002245	RCL1	RNA terminal phosphate cyclase like 1	152.75	145.75	158.25	155.75	125.5	171.5	137.25
ENSMGAG00000002248	STRIP1	striatin interacting protein 1	1343.25	1393.75	1307	1356.5	1471.75	1109.25	1214
ENSMGAG00000002249	ENSMGAG00000002249	Polypeptide N-acetylgalactosaminyltransferase 17	96	137.75	112	59	84.75	34.75	71.5
ENSMGAG00000002250	ATP9B	ATPase phospholipid transporting 9B (putative) [Source:HGNC Symbol;Acc:HGNC:13541]	520.75	585.25	542.5	644	558.75	572.75	548.5
ENSMGAG00000002252	GOLGA7	golgin A7 [Source:HGNC Symbol;Acc:HGNC:24876]	1580.75	1504.25	1479.5	1801.75	1627	1675	1210.75
ENSMGAG00000002253	FAM65A	RHO family interacting cell polarization regulator 1	1220.5	1271.75	1182.5	672.75	901	561.5	771
ENSMGAG00000002254	LOC100544344	serine protease 23-like	80.25	84.5	86.75	74	112.75	49.25	71.75
ENSMGAG00000002255	PUM3	Pumilio RNA binding family member 3	125.75	128.75	101.25	123.75	120	103	100.5
ENSMGAG00000002256	ABHD17A	abhydrolase domain containing 17A, depalmitoylase [Source:HGNC Symbol;Acc:HGNC:28756]	929	990.25	956	798.75	975.75	649	722.75
ENSMGAG00000002257	LOC100544502	nuclear cap-binding protein subunit 2	1732.75	1451	1471.25	1338.5	1408.75	1352	1080.5
ENSMGAG00000002259	LOC100541746	prolyl-tRNA synthetase associated domain-containing protein 1-like	150.75	122.25	137.5	135	122.25	134.5	85
ENSMGAG00000002261	ENSMGAG00000002261	B30.2/SPRY domain-containing protein	170.5	187	173.75	162.75	156.75	128.25	145.25
ENSMGAG00000002262	MTIF2	translation initiation factor IF-2, mitochondrial	319	293.25	315	473	348.5	355	271.5
ENSMGAG00000002263	EHHADH	enoyl-CoA hydratase and 3-hydroxyacyl CoA dehydrogenase [Source:HGNC Symbol;Acc:HGNC:3247]	379.25	392.5	324.75	222.5	297.5	222.75	281.5
ENSMGAG00000002265	NELFB	negative elongation factor complex member B	674.5	625.5	609.25	609.5	639.25	489.75	516.5
ENSMGAG00000002266	RPP25	ribonuclease P and MRP subunit p25 [Source:HGNC Symbol;Acc:HGNC:30361]	0.5	1	2	0	0.25	1.5	1
ENSMGAG00000002267	REXO1	RNA exonuclease 1 homolog	1053	1097	959.25	1071.75	1110	906.5	1012.75
ENSMGAG00000002268	SEC22C	SEC22 homolog C, vesicle trafficking protein [Source:HGNC Symbol;Acc:HGNC:16828]	343	378	262.5	305.25	324.25	262	306.25
ENSMGAG00000002269	COX5A	cytochrome c oxidase subunit 5A [Source:HGNC Symbol;Acc:HGNC:2267]	4329	3887.5	4115.75	3844.5	4214.25	3427.5	3241
ENSMGAG00000002272	SFRP1	secreted frizzled related protein 1 [Source:HGNC Symbol;Acc:HGNC:10776]	144	148.75	148.25	83.75	222.5	123.5	146.25
ENSMGAG00000002275	AUTS2	Activator of transcription and developmental regulator AUTS2	253	242.5	232.5	227.75	201.25	211.75	205.5
ENSMGAG00000002276	CBFA2T2	CBFA2/RUNX1 partner transcriptional co-repressor 2	137.75	149.5	149	105.75	160.25	93.25	158
ENSMGAG00000002277	USP40	ubiquitin specific peptidase 40	1659.5	1638	1456	1712.5	1707.75	1310.25	1541.75
ENSMGAG00000002279	MAP3K13	mitogen-activated protein kinase kinase kinase 13	378.75	406.25	358	306.5	348.75	267	380.5
ENSMGAG00000002280	RHOA	ras homolog family member A [Source:HGNC Symbol;Acc:HGNC:667]	11211	10794.8	10922.2	10449.2	10992.8	11296	9487.25
ENSMGAG00000002282	MPI	mannose phosphate isomerase [Source:HGNC Symbol;Acc:HGNC:7216]	896.75	924.25	887.5	787.5	865.25	652	604.75
ENSMGAG00000002284	RPS27AP5	40S ribosomal protein S27a (Ubiquitin carboxyl extension protein 80) (Ubiquitin-40S ribosomal protein S27a)	4451.75	3573	4135.5	3835.25	3644	3779.25	2681.75
ENSMGAG00000002286	ALX3	ALX homeobox 3	0	0	0	0	0	0	0
ENSMGAG00000002287	CFAP45	Cilia and flagella associated protein 45	2398	2279.75	1890.5	887	1271.25	1533.5	1530.25
ENSMGAG00000002288	ZMAT4	zinc finger matrin-type 4 [Source:HGNC Symbol;Acc:HGNC:25844]	17.5	13.75	17.25	6.25	9.5	7.25	9.75
ENSMGAG00000002289	PARG	poly(ADP-ribose) glycohydrolase [Source:HGNC Symbol;Acc:HGNC:8605]	993.5	998.5	908.25	1090.25	932	926	879.75
ENSMGAG00000002291	GABRD	gamma-aminobutyric acid type A receptor delta subunit	15.75	17	17	13.25	10.5	12.25	16.5
ENSMGAG00000002292	NKTR	natural killer cell triggering receptor [Source:HGNC Symbol;Acc:HGNC:7833]	2619.25	2820.75	2423	2599.5	2374.5	2303	3104.75
ENSMGAG00000002293	LOC104912983	uncharacterized oxidoreductase C663.06c-like	116	103	102.5	76.25	101.5	70.75	96.5
ENSMGAG00000002294	GPX1	glutathione peroxidase 1	5034.5	5049.5	4959	3383.25	5050.25	3540.5	4089.75
ENSMGAG00000002295	TCIM	transcriptional and immune response regulator [Source:HGNC Symbol;Acc:HGNC:1357]	185.75	203.25	231.75	271	243	274	226.5
ENSMGAG00000002296	LOC100540450	rho GTPase-activating protein 7-like	70.75	90.25	80	50.25	62.25	42	71.25
ENSMGAG00000002297	SALL3	spalt like transcription factor 3 [Source:HGNC Symbol;Acc:HGNC:10527]	114.75	119.5	109	2.25	69.25	30.75	34.5
ENSMGAG00000002298	SLC6A17	solute carrier family 6 member 17 [Source:HGNC Symbol;Acc:HGNC:31399]	1	1.75	1.25	4.5	12.5	5.25	11.5
ENSMGAG00000002299	DBX1	developing brain homeobox 1 [Source:HGNC Symbol;Acc:HGNC:33185]	0	0	0	0	0	0	0
ENSMGAG00000002300	IDO2	indoleamine 2,3-dioxygenase 2	0.75	0.25	2.25	2.75	2.25	1.25	2.25
ENSMGAG00000002301	LOC104909464	reticulon-4-like	90.5	119.25	122.5	136.75	118.75	124.75	118.25
ENSMGAG00000002302	SCAMP2	secretory carrier membrane protein 2 [Source:HGNC Symbol;Acc:HGNC:10564]	2133.5	2275	2181	2259	2681.75	2228.75	2116.5
ENSMGAG00000002303	E2F8	E2F transcription factor 8 [Source:HGNC Symbol;Acc:HGNC:24727]	629.75	269.75	364.5	41.5	33.25	67.5	46.25
ENSMGAG00000002304	RFWD2	COP1 E3 ubiquitin ligase	513.25	454.25	454.25	1016	473.5	1401	591.25
ENSMGAG00000002305	USP4	ubiquitin specific peptidase 4 [Source:HGNC Symbol;Acc:HGNC:12627]	1497.5	1555.75	1533.5	1659.25	1500	1554	1504.75
ENSMGAG00000002307	STX2	syntaxin 2	875	913.25	797.25	873.75	779.25	772.75	758.25
ENSMGAG00000002308	C2CD4C	C2 calcium dependent domain containing 4C	531	601.5	468	314	555.75	374	527.25
ENSMGAG00000002310	ENSMGAG00000002310	Uncharacterized protein	96.25	58.25	57.75	36.25	32.25	25.25	30.25
ENSMGAG00000002311	CASTOR2	Cytosolic arginine sensor for mTORC1 subunit 2	388.25	431.75	378	246.75	415.75	291.75	345.75
ENSMGAG00000002313	LOC100539008	glutamine synthetase	723.5	733.5	748	333.5	756.5	746.5	937.75
ENSMGAG00000002314	DUSP3	dual specificity phosphatase 3	289.75	323.25	357.75	380.75	363	407.75	305.75
ENSMGAG00000002315	KIAA0319	KIAA0319 [Source:HGNC Symbol;Acc:HGNC:21580]	5.5	3.75	7.25	1.25	1.75	2.25	2.5
ENSMGAG00000002316	POU2F3	POU class 2 homeobox 3 [Source:HGNC Symbol;Acc:HGNC:19864]	32.5	25.25	24.5	4.75	7.25	1.75	3.5
ENSMGAG00000002317	ETV4	ETS variant transcription factor 4 [Source:HGNC Symbol;Acc:HGNC:3493]	502	350.25	346	163.25	213.25	178.75	384
ENSMGAG00000002319	TMEM41A	Transmembrane protein 41A	368.5	387.25	371.5	418.25	420.75	415.5	352.5
ENSMGAG00000002320	RARS1	arginyl-tRNA synthetase 1 [Source:HGNC Symbol;Acc:HGNC:9870]	1627.5	1498.25	1567	1713.5	1748.25	1614	1488.25
ENSMGAG00000002321	RCC1L	RCC1 like	540.5	533.5	460	475.75	471.75	419.25	395.75
ENSMGAG00000002324	CFAP74	cilia and flagella associated protein 74	1904.25	1850.5	1541.5	914	882.5	1051.5	1271.5
ENSMGAG00000002325	MEX3D	Mex-3 RNA binding family member D	356.25	334.75	315	191.5	246.25	134.75	203.75
ENSMGAG00000002326	LOC100547860	fibulin-7-like	2	4	3	1.75	2	3.75	3
ENSMGAG00000002327	CSRP3	cysteine and glycine rich protein 3 [Source:HGNC Symbol;Acc:HGNC:2472]	0	0	0	0	0	0	0.25
ENSMGAG00000002329	LOC100547197	SRC kinase signaling inhibitor 1-like	485.5	587	423	510.5	549	348.5	759.5
ENSMGAG00000002330	SLC16A4	solute carrier family 16 member 4 [Source:HGNC Symbol;Acc:HGNC:10925]	41.5	38	42.5	20.5	38	34	30.75
ENSMGAG00000002331	LOC104914240	disintegrin and metalloproteinase domain-containing protein 32-like	28.75	27.25	26.25	14.25	20.75	19.25	25.75
ENSMGAG00000002332	ARRDC1	arrestin domain containing 1 [Source:HGNC Symbol;Acc:HGNC:28633]	678.25	708.5	703.5	604.5	912.5	580.25	741.5
ENSMGAG00000002333	RIMBP2	RIMS binding protein 2	149.75	116.75	105.75	160.5	221.75	15	83.75
ENSMGAG00000002334	LIPH	lipase H [Source:HGNC Symbol;Acc:HGNC:18483]	10.75	8.5	4.25	8.5	7.75	6.25	5.75
ENSMGAG00000002335	ADAM9	ADAM metallopeptidase domain 9 [Source:HGNC Symbol;Acc:HGNC:216]	496.5	566.75	515.75	513	505	349.75	465.5
ENSMGAG00000002336	DLG3	Discs large MAGUK scaffold protein 3	503.5	521.75	520.25	517.75	615.75	390.75	555.5
ENSMGAG00000002339	TMEM200B	Transmembrane protein 200B	233.25	274.75	265.25	186	274.25	160.75	195
ENSMGAG00000002340	ATP8B3	ATPase phospholipid transporting 8B3	123.25	270.75	200.75	165	658.75	159.75	637.75
ENSMGAG00000002343	DHX8	DEAH-box helicase 8 [Source:HGNC Symbol;Acc:HGNC:2749]	628.75	668	579.25	649.25	603.25	589.5	557.25
ENSMGAG00000002344	ENSMGAG00000002344	Uncharacterized protein	6.5	2	0.75	0.25	0.5	1.25	0.75
ENSMGAG00000002345	ALDH5A1	aldehyde dehydrogenase 5 family member A1 [Source:HGNC Symbol;Acc:HGNC:408]	643.5	712	673.75	608.75	648.75	500.75	553.75
ENSMGAG00000002348	PAPPA2	Pappalysin 2	1.25	7.25	7.75	5.5	6	24.5	12.5
ENSMGAG00000002349	LOC100550717	lethal (3)malignant brain tumor-like protein 4	937.25	981	938.25	1034.75	934.25	773.25	1042.5
ENSMGAG00000002350	GPLD1	glycosylphosphatidylinositol specific phospholipase D1 [Source:HGNC Symbol;Acc:HGNC:4459]	2	2.25	3.5	2	1.5	0.5	1.5
ENSMGAG00000002352	TRIM29	tripartite motif containing 29 [Source:HGNC Symbol;Acc:HGNC:17274]	141.75	125.25	142.75	39.5	84.5	130	111.75
ENSMGAG00000002353	ZBTB47	zinc finger and BTB domain containing 47 [Source:HGNC Symbol;Acc:HGNC:26955]	496.75	623.5	649.5	434.25	587.5	382.75	479.25
ENSMGAG00000002354	NCOA4	nuclear receptor coactivator 4	3053	3171.5	2985.25	2821.5	3071	2630.5	2626.75
ENSMGAG00000002355	TMEM52	Transmembrane protein 52	57.75	67.25	53.5	98.75	55.75	36.5	41.25
ENSMGAG00000002356	LOC100547885	UDP-glucuronosyltransferase 1-1-like	261	275.5	293.5	406	526.75	732.5	350.5
ENSMGAG00000002357	NCF1	neutrophil cytosolic factor 1	57.5	69.5	76.25	48.25	82.5	49.75	56.5
ENSMGAG00000002358	EHMT1	euchromatic histone lysine methyltransferase 1	1942.75	1882.25	1795.25	1611.75	1793.5	1223	1621.25
ENSMGAG00000002359	GNB4	G protein subunit beta 4 [Source:HGNC Symbol;Acc:HGNC:20731]	415.75	539.25	445.25	393	411.25	310.5	416.25
ENSMGAG00000002360	EML6	echinoderm microtubule associated protein like 6	69	73.75	63	142.75	93.5	131	130.25
ENSMGAG00000002361	LAMTOR5	late endosomal/lysosomal adaptor, MAPK and MTOR activator 5	690.5	662	694	568.5	659.25	567	519.5
ENSMGAG00000002362	LOC100548147	centrosomal protein of 63 kDa-like	307	284.5	288.25	233.75	302.75	243.25	235.5
ENSMGAG00000002363	ENSMGAG00000002363	SH3 domain-containing protein	169.75	144.5	153.75	116.75	89	78.75	102.5
ENSMGAG00000002364	NECAB3	N-terminal EF-hand calcium binding protein 3	377.75	434.75	390.5	602.25	521.5	375.25	403
ENSMGAG00000002365	ENSMGAG00000002365	Uncharacterized protein	0	0	0	0	0	0	0
ENSMGAG00000002367	PROK2	prokineticin 2 [Source:HGNC Symbol;Acc:HGNC:18455]	0	0	0	0	0	0	0
ENSMGAG00000002368	OSBPL7	oxysterol binding protein like 7 [Source:HGNC Symbol;Acc:HGNC:16387]	271	332	262.5	259.75	301.25	161.5	255.75
ENSMGAG00000002369	LOC100539842	embryonic pepsinogen	0	0	0	0	0	0	0
ENSMGAG00000002370	SPOCK3	SPARC (osteonectin), cwcv and kazal like domains proteoglycan 3 [Source:HGNC Symbol;Acc:HGNC:13565]	13	16.5	21	177.25	13.75	33.5	16.5
ENSMGAG00000002371	PANK3	pantothenate kinase 3 [Source:HGNC Symbol;Acc:HGNC:19365]	1022.75	1001	915.25	1020.25	992.5	725.75	726.25
ENSMGAG00000002372	NECTIN1	nectin cell adhesion molecule 1 [Source:HGNC Symbol;Acc:HGNC:9706]	913.25	1035.75	907.5	826.25	1390.5	532	806.5
ENSMGAG00000002374	ENSMGAG00000002374	MACPF domain-containing protein	58	93.75	71.25	142	440.75	147.25	357.25
ENSMGAG00000002375	KLHL40	kelch like family member 40	2.5	5.5	1.75	3	2	3.5	9.5
ENSMGAG00000002376	ULK3	unc-51 like kinase 3 [Source:HGNC Symbol;Acc:HGNC:19703]	442.5	471.75	422.75	419.5	435.5	278.25	323.75
ENSMGAG00000002377	KIAA0895L	KIAA0895 like	45.25	47	36	43.25	50	30	43.25
ENSMGAG00000002378	SYT15	synaptotagmin 15	131.75	216.25	151.75	626.25	306.75	353.25	357.25
ENSMGAG00000002379	FZD10	frizzled class receptor 10 [Source:HGNC Symbol;Acc:HGNC:4039]	54	30.5	44.75	23	20	28.5	15.75
ENSMGAG00000002382	PIWIL1	piwi like RNA-mediated gene silencing 1	42.25	15.75	23.25	12.75	13.5	14	7
ENSMGAG00000002383	UBTF	upstream binding transcription factor, RNA polymerase I	3333.5	3093.25	3007.5	3063.75	3387	2588.5	2723.25
ENSMGAG00000002385	E2F1	E2F transcription factor 1 [Source:HGNC Symbol;Acc:HGNC:3113]	513.75	397	431.75	321.75	299.25	266.75	214.25
ENSMGAG00000002386	TMEM208	Transmembrane protein 208	138	136.25	140.5	138.25	160.75	157.5	143.75
ENSMGAG00000002387	KY	Kyphoscoliosis peptidase	1282.5	1249	1006.25	505.25	667	622	934.25
ENSMGAG00000002388	TCF3	transcription factor 3	310.75	319.25	252.25	170.25	214.75	136.5	186.75
ENSMGAG00000002389	SPTBN1	spectrin beta, non-erythrocytic 1	10621	10767.8	10032.2	10263.8	10390.5	9601.75	10366.5
ENSMGAG00000002390	LOC100550588	7-dehydrocholesterol reductase-like	237	240	228.25	202.25	269.5	176	205.25
ENSMGAG00000002391	CPLX3	complexin 3 [Source:HGNC Symbol;Acc:HGNC:27652]	0	0	0	0	0	0.25	0
ENSMGAG00000002392	WWC1	WW and C2 domain containing 1 [Source:HGNC Symbol;Acc:HGNC:29435]	1788.25	1630.75	1429.25	1492.5	1384.25	2037.75	1851.5
ENSMGAG00000002393	HHATL	hedgehog acyltransferase like [Source:HGNC Symbol;Acc:HGNC:13242]	144.5	160.75	121.5	87.75	120.25	99.75	172.75
ENSMGAG00000002394	CSK	C-terminal Src kinase [Source:HGNC Symbol;Acc:HGNC:2444]	1011.75	920.75	883.25	767.25	788.25	662	628.5
ENSMGAG00000002395	C1QTNF5	C1q and TNF related 5 [Source:HGNC Symbol;Acc:HGNC:14344]	355.25	368.25	412.25	148.75	260	161.5	209.75
ENSMGAG00000002398	LPL	lipoprotein lipase	388.25	670.5	588	388.5	316.5	508	473
ENSMGAG00000002399	EPHB1	EPH receptor B1	1076	975.5	938.5	403.25	683.25	258.5	458.5
ENSMGAG00000002400	SRSF4	serine and arginine rich splicing factor 4	165.25	132	119	105.75	85.75	101.5	99.25
ENSMGAG00000002402	CCDC13	coiled-coil domain containing 13	2391.75	2410	1940.25	1490.25	1482	2031.25	2074
ENSMGAG00000002403	SHLD2	shieldin complex subunit 2 [Source:HGNC Symbol;Acc:HGNC:28773]	479.25	429.5	398	519.25	393	508.75	466.5
ENSMGAG00000002405	LOC100547089	C-type lectin domain family 18 member A-like	1	0.25	1	0.75	0	0.5	0.25
ENSMGAG00000002406	CBL	Cbl proto-oncogene [Source:HGNC Symbol;Acc:HGNC:1541]	705	786	657.25	560.5	546.5	407.75	603
ENSMGAG00000002408	PXMP4	Peroxisomal membrane protein 4	1079.75	1174.5	1082.25	1239	1410	1077.5	1033.5
ENSMGAG00000002410	HIGD1A	HIG1 hypoxia inducible domain family member 1A [Source:HGNC Symbol;Acc:HGNC:29527]	762.5	805.75	841.25	1307.5	1129	936	868.75
ENSMGAG00000002411	PNPLA1	patatin like phospholipase domain containing 1	3	2	2.75	3.5	5	0.5	3.25
ENSMGAG00000002413	CACNA1B	calcium voltage-gated channel subunit alpha1 B [Source:HGNC Symbol;Acc:HGNC:1389]	8	9.25	12	1.5	2	2.75	2.75
ENSMGAG00000002414	PHB	prohibitin [Source:HGNC Symbol;Acc:HGNC:8912]	1720	1625.5	1682.5	1709	1768.25	1560.25	1425.25
ENSMGAG00000002415	NADSYN1	NAD synthetase 1	194.5	191.75	197.25	236.25	230.25	190.5	204.25
ENSMGAG00000002416	SNCG	synuclein gamma [Source:HGNC Symbol;Acc:HGNC:11141]	1064.5	753.5	740	317.25	378.5	489.25	391
ENSMGAG00000002418	ARSA	arylsulfatase A	1821	2017.25	1841.5	1867	2221.75	1631.75	2018.75
ENSMGAG00000002421	LCAT	lecithin-cholesterol acyltransferase	50	42	51	95	147.75	205.75	211.75
ENSMGAG00000002422	BRINP2	BMP/retinoic acid inducible neural specific 2	2.25	3.75	4.25	14.5	69.5	5	21.75
ENSMGAG00000002423	ZNF341	zinc finger protein 341	342.5	358.75	340.25	351.75	311	249.5	335.5
ENSMGAG00000002424	ENSMGAG00000002424	Fibronectin type-III domain-containing protein	7	9.25	12	8.25	3.5	3.75	3.75
ENSMGAG00000002426	ETV7	ETS variant transcription factor 7 [Source:HGNC Symbol;Acc:HGNC:18160]	17.5	22.5	15	3.5	5.75	13.5	8.75
ENSMGAG00000002427	RIC8A	RIC8 guanine nucleotide exchange factor A	638.75	642.75	628.75	522.25	592.75	470.25	499
ENSMGAG00000002430	GOLGB1	golgin B1	1909.75	2074	1951.25	2535	2140.5	1947	1877.25
ENSMGAG00000002431	MRS2	magnesium transporter MRS2 [Source:HGNC Symbol;Acc:HGNC:13785]	266	229	228.25	226.25	230	230.25	189.75
ENSMGAG00000002432	DDX60	DExD/H-box helicase 60 [Source:HGNC Symbol;Acc:HGNC:25942]	1099	1176.25	1503.5	127.5	107.25	1791.5	1182.75
ENSMGAG00000002433	SHISA6	Uncharacterized protein	1	0.75	4	0	0.25	0.5	1
ENSMGAG00000002434	ZNF652	zinc finger protein 652 [Source:HGNC Symbol;Acc:HGNC:29147]	1230.75	1334	1278	1372	1224.5	1009	1098
ENSMGAG00000002436	RNF222	ring finger protein 222	1	1	0.5	0	3.5	0.25	2.25
ENSMGAG00000002437	GLUD1	glutamate dehydrogenase 1	1069	1303.5	1145.75	2440	1330.5	1568	1647.25
ENSMGAG00000002438	TENM2	teneurin transmembrane protein 2 [Source:HGNC Symbol;Acc:HGNC:29943]	3822	4158.25	2981.75	2592	1902.75	1102.25	2117
ENSMGAG00000002439	TMEM132D	transmembrane protein 132D	29.75	53.25	45.5	129	50	47.25	70.5
ENSMGAG00000002440	GDPD2	glycerophosphodiester phosphodiesterase domain containing 2	589.75	628	538	328.5	1105.25	387.5	939
ENSMGAG00000002441	MECR	mitochondrial trans-2-enoyl-CoA reductase	342.5	349.5	319	228.5	252.5	161.25	228.25
ENSMGAG00000002442	NDEL1	nudE neurodevelopment protein 1 like 1	1179	1335	1309.25	1509.5	1486.25	1375	1297.25
ENSMGAG00000002443	SEC16B	SEC16 homolog B, endoplasmic reticulum export factor	22.5	22.25	11.75	14	31.5	11	22.5
ENSMGAG00000002444	CHMP4B	charged multivesicular body protein 4B	1914	1830.25	1796.5	2043.25	2127.5	2381	1946.75
ENSMGAG00000002445	il11ra	interleukin 11 receptor subunit alpha	292	299.75	375.75	285.25	313.5	246.25	263.5
ENSMGAG00000002446	ELMO3	engulfment and cell motility 3	835	1165.75	809.75	1135.25	1376.25	848.75	943.75
ENSMGAG00000002447	PHOSPHO1	phosphoethanolamine/phosphocholine phosphatase 1 [Source:HGNC Symbol;Acc:HGNC:16815]	39.5	40.25	44.5	50.25	46.5	24	50.5
ENSMGAG00000002448	ACKR2	atypical chemokine receptor 2 [Source:HGNC Symbol;Acc:HGNC:1565]	8	13.25	11	9	8.75	7.75	10.75
ENSMGAG00000002450	CAPG	capping actin protein, gelsolin like	347.75	282.5	320.25	65	108.5	79.25	107.5
ENSMGAG00000002452	MMRN2	multimerin 2 [Source:HGNC Symbol;Acc:HGNC:19888]	495.25	506.75	476.25	455.25	410.75	323.75	364.75
ENSMGAG00000002453	GLT1D1	glycosyltransferase 1 domain containing 1 [Source:HGNC Symbol;Acc:HGNC:26483]	72.25	41.75	49	81.75	62.5	36	37.75
ENSMGAG00000002454	PALLD	palladin, cytoskeletal associated protein [Source:HGNC Symbol;Acc:HGNC:17068]	6976.75	9403.5	9056.75	6615	7919.25	6333.75	7293.25
ENSMGAG00000002455	ABI3	ABI family member 3	14.25	12.75	10	16.5	11.5	4.75	13.25
ENSMGAG00000002456	DCDC2	doublecortin domain containing 2 [Source:HGNC Symbol;Acc:HGNC:18141]	696.75	573.25	624.75	321	413.25	487.5	313.5
ENSMGAG00000002457	SIRT3	sirtuin 3	621.5	551.25	500.5	503	546.5	562.75	519.5
ENSMGAG00000002458	FARSA	phenylalanyl-tRNA synthetase subunit alpha [Source:HGNC Symbol;Acc:HGNC:3592]	886.75	852.75	823.25	748.75	822.25	509	615.25
ENSMGAG00000002459	LOC100544984	perilipin-3-like	0.25	0.25	0.75	0	0	0.25	0.5
ENSMGAG00000002460	LOC100540415	LIM homeobox transcription factor 1-alpha-like	33.5	35.25	29.5	4.25	14.25	1.25	6.5
ENSMGAG00000002461	AADAT	aminoadipate aminotransferase [Source:HGNC Symbol;Acc:HGNC:17929]	424.75	375.5	406.25	354.25	318.25	320.75	304
ENSMGAG00000002462	CLIP2	CAP-Gly domain containing linker protein 2 [Source:HGNC Symbol;Acc:HGNC:2586]	1620.75	1765	1543	1127.25	1267.75	1071	1394
ENSMGAG00000002463	PTPRU	protein tyrosine phosphatase receptor type U	7468	7168	7994.25	3477.25	4571.75	3256.5	4458.75
ENSMGAG00000002464	BMPR1A	bone morphogenetic protein receptor type 1A [Source:HGNC Symbol;Acc:HGNC:1076]	364	414	370.5	438.75	365.25	361.75	437.25
ENSMGAG00000002465	LRCH2	leucine rich repeats and calponin homology domain containing 2 [Source:HGNC Symbol;Acc:HGNC:29292]	320.25	346.5	324.5	335.5	332.75	267.75	334.25
ENSMGAG00000002466	EMC3	ER membrane protein complex subunit 3	913.75	835.5	828.5	1207.75	1104.5	1189.25	927
ENSMGAG00000002468	LOC100543103	quinone oxidoreductase-like protein 2	352	322	295.25	269	324.75	276.5	259.5
ENSMGAG00000002469	MYH10	myosin heavy chain 10	20274	25548.8	24080.2	18684.8	18645	17332.8	21163.8
ENSMGAG00000002470	CALR	calreticulin [Source:HGNC Symbol;Acc:HGNC:1455]	13200	12205	12050.2	17405.2	16878.8	15683.2	14090.2
ENSMGAG00000002471	PSMD13	26S proteasome non-ATPase regulatory subunit 13 (26S proteasome regulatory subunit RPN9) (26S proteasome regulatory subunit S11) (26S proteasome regulatory subunit p40.5)	1486	1448.5	1454.75	1534	1544.25	1253.25	1209.75
ENSMGAG00000002472	NRSN1	neurensin 1 [Source:HGNC Symbol;Acc:HGNC:17881]	82.25	102	93.25	566.75	284.75	658.5	185.25
ENSMGAG00000002473	KCTD20	potassium channel tetramerization domain containing 20	781.75	738.25	766.25	777.5	883.5	739	688.25
ENSMGAG00000002474	MCAM	melanoma cell adhesion molecule [Source:HGNC Symbol;Acc:HGNC:6934]	3285.5	3908.25	4185.5	1884.25	2823	1908.5	2609.25
ENSMGAG00000002475	PHF24	PHD finger protein 24 [Source:HGNC Symbol;Acc:HGNC:29180]	6.5	6.25	7	0.5	3	2.25	2
ENSMGAG00000002476	PRL	prolactin [Source:NCBI gene (formerly Entrezgene);Acc:100303694]	0	0	0	0.5	3	0	0.5
ENSMGAG00000002477	RASAL2	RAS protein activator like 2	488.25	565.75	462.75	489.75	669.25	279	561.5
ENSMGAG00000002478	FANCD2	Fanconi anemia complementation group D2	317.75	243	264.5	123	142.75	136.5	109.75
ENSMGAG00000002479	SLC15A4	solute carrier family 15 member 4 [Source:HGNC Symbol;Acc:HGNC:23090]	776.25	747.25	737	680.75	761.5	821.5	611.75
ENSMGAG00000002481	ACYP2	Acylphosphatase (EC 3.6.1.7)	125	107.5	107.25	122.25	121.5	136.75	107.25
ENSMGAG00000002482	LOC100542873	serine/threonine-protein kinase 38	341.75	371	352.25	296	295.25	296	312.25
ENSMGAG00000002483	DNAJB5	DnaJ heat shock protein family (Hsp40) member B5	798.25	1125	1092.25	833.75	878.25	734.5	835.75
ENSMGAG00000002484	PSME4	proteasome activator subunit 4 [Source:HGNC Symbol;Acc:HGNC:20635]	922.75	1008.75	942.5	1329.75	968.75	1020.75	1043.25
ENSMGAG00000002485	LOC100543893	TOX high mobility group box family member 2-like	19.5	17.5	24.5	90.25	23.5	69.25	31
ENSMGAG00000002486	NADK	NAD kinase [Source:HGNC Symbol;Acc:HGNC:29831]	1394.25	1432.75	1300.75	1071.5	1227.25	1108.5	1186.25
ENSMGAG00000002487	RFC2	replication factor C subunit 2	1107.25	912.5	837.75	804.5	1194.75	1071.75	761.25
ENSMGAG00000002489	LOC100549801	cytochrome b-c1 complex subunit 10	1447	1342.75	1421	1633.5	1624.5	1491.25	1121.5
ENSMGAG00000002490	TRPC4AP	transient receptor potential cation channel subfamily C member 4 associated protein	1732.5	1799.25	1569	2096.25	1906.75	1343	1764.25
ENSMGAG00000002491	LOC100548376	transitional endoplasmic reticulum ATPase	4541.25	4512.75	4272	4591	4482.5	3788.5	4095.75
ENSMGAG00000002493	MBD3	methyl-CpG binding domain protein 3	303.5	270	291.75	223.5	248	209.25	225.25
ENSMGAG00000002495	MFAP3L	microfibril associated protein 3 like [Source:HGNC Symbol;Acc:HGNC:29083]	55.5	62.75	61.25	90.25	70.25	89.75	85.5
ENSMGAG00000002496	PGGHG	protein-glucosylgalactosylhydroxylysine glucosidase	465.25	479	437	340.5	357	383.25	371.25
ENSMGAG00000002497	IGF2BP1	insulin like growth factor 2 mRNA binding protein 1 [Source:HGNC Symbol;Acc:HGNC:28866]	0.25	0	0	0	0	0	0
ENSMGAG00000002498	HPF1	histone PARylation factor 1 [Source:HGNC Symbol;Acc:HGNC:26051]	470.5	379.25	403.5	411.5	401	457.5	340.25
ENSMGAG00000002499	ENSMGAG00000002499	pseudogene	3517.75	4711	2053.5	1419	1195	1364	2294.5
ENSMGAG00000002500	SPIN1	spindlin 1	319.25	323.5	282.5	618.5	374.75	230	248.75
ENSMGAG00000002501	TMEM132C	transmembrane protein 132C [Source:HGNC Symbol;Acc:HGNC:25436]	106	84.75	101.25	120	86.75	74	81.5
ENSMGAG00000002502	LOC100538407	guanylyl cyclase-activating protein 1-like	0	0	0	0	0	0	0
ENSMGAG00000002503	SRSF3	serine and arginine rich splicing factor 3	2019.5	1776.5	1864.5	1920.5	1963.25	1871	1627.25
ENSMGAG00000002504	LAT2	linker for activation of T cells family member 2 [Source:HGNC Symbol;Acc:HGNC:12749]	19	20.75	16	14	28.5	8.75	14.25
ENSMGAG00000002505	MICALL2	MICAL like 2	964	943.5	862	697.5	919.5	572.5	800.75
ENSMGAG00000002506	CDKAL1	CDK5 regulatory subunit associated protein 1 like 1 [Source:HGNC Symbol;Acc:HGNC:21050]	807.5	755.5	690.5	499.5	461.25	513	482.25
ENSMGAG00000002507	LDB3	LIM domain binding 3 [Source:HGNC Symbol;Acc:HGNC:15710]	7.25	7.75	7.5	7.25	3.5	5	3.75
ENSMGAG00000002508	EIF4H	Eukaryotic translation initiation factor 4H	1937.5	1940.5	1883	2059.5	2010.75	1737.5	1704
ENSMGAG00000002509	CLCN3	chloride voltage-gated channel 3 [Source:HGNC Symbol;Acc:HGNC:2021]	3508.5	4158.75	3572	6283	5742	5540.75	4284
ENSMGAG00000002510	LOC100549000	transcription factor E2F3-like	45	40.5	44.75	48	41	31.75	30.5
ENSMGAG00000002511	ENSMGAG00000002511	pseudogene	205	173.5	159.75	131.25	167	111.5	132
ENSMGAG00000002513	RALGPS2	Ral GEF with PH domain and SH3 binding motif 2	453.5	402.5	411	273	414.25	356.25	352.5
ENSMGAG00000002514	SBF1	SET binding factor 1 [Source:HGNC Symbol;Acc:HGNC:10542]	2726.25	3250	2854.5	2890.5	3008.25	1973.75	2584.75
ENSMGAG00000002517	E2F4	E2F transcription factor 4	167.5	201	161.25	167.5	175.75	147.75	174.25
ENSMGAG00000002518	CYP1A5	cytochrome P450, family 1, subfamily A, polypeptide 5 [Source:NCBI gene (formerly Entrezgene);Acc:664714]	0	0	0	0.25	0	0.25	0
ENSMGAG00000002519	LOC100544198	myosin heavy chain, skeletal muscle, adult	1.5	3.25	1.75	2.25	5.25	2	2
ENSMGAG00000002522	HMMR	hyaluronan mediated motility receptor [Source:HGNC Symbol;Acc:HGNC:5012]	322.5	148.5	234.25	57.75	45.25	63.5	37.5
ENSMGAG00000002523	MBOAT1	membrane bound O-acyltransferase domain containing 1 [Source:HGNC Symbol;Acc:HGNC:21579]	337	353.25	346.75	332.25	205.5	289	271.5
ENSMGAG00000002524	SH3BP4	SH3 domain binding protein 4 [Source:HGNC Symbol;Acc:HGNC:10826]	1480	1617.5	1370	1460.75	1754	890.25	1395.25
ENSMGAG00000002525	TMEM132B	transmembrane protein 132B [Source:HGNC Symbol;Acc:HGNC:29397]	20.5	33.25	25	10	24.25	12	25
ENSMGAG00000002527	HTR2C	5-hydroxytryptamine receptor 2C	5.75	7	7.5	6.25	5.75	4.5	5.75
ENSMGAG00000002528	HOXB8	homeobox B8	77.75	62.75	68	76.75	90.75	61	63
ENSMGAG00000002529	IFITM5	interferon induced transmembrane protein 5 [Source:HGNC Symbol;Acc:HGNC:16644]	364	397.75	388.5	153.5	252.5	173.75	178.5
ENSMGAG00000002532	MIER2	MIER family member 2	362	414.5	392	464.5	426.5	321	360.25
ENSMGAG00000002533	EDEM2	ER degradation enhancing alpha-mannosidase like protein 2	795.5	791.25	743	1128.5	1010.5	1017.25	1054.25
ENSMGAG00000002535	IBA57	iron-sulfur cluster assembly factor IBA57 [Source:HGNC Symbol;Acc:HGNC:27302]	293.5	294	281	263	238.75	220.75	284.25
ENSMGAG00000002537	AGAP1	ArfGAP with GTPase domain, ankyrin repeat and PH domain 1 [Source:HGNC Symbol;Acc:HGNC:16922]	573.5	663.25	565	661.25	622.25	398.75	543.75
ENSMGAG00000002538	ENSMGAG00000002538	interferon-induced transmembrane protein 3-like	0	1	0.25	0.25	0.25	0	0.25
ENSMGAG00000002539	LOC100547397	C-type lectin domain family 2 member B-like	599.75	729.25	478.25	416.25	503.5	519.75	556.75
ENSMGAG00000002540	PGGT1B	protein geranylgeranyltransferase type I subunit beta [Source:HGNC Symbol;Acc:HGNC:8895]	156.75	141	148	157.5	136	149	105.25
ENSMGAG00000002541	HOXB3	homeobox B3	289.5	264.5	271	191	237.75	168.25	232.75
ENSMGAG00000002543	OPN4	opsin 4 [Source:HGNC Symbol;Acc:HGNC:14449]	0.5	1.25	0.75	0	2.5	0.75	1
ENSMGAG00000002545	LOC100539142	dispanin subfamily A member 2b-like	5796.75	5966	7074.25	1567.5	2083.25	6778.25	5409
ENSMGAG00000002547	INTS1	integrator complex subunit 1	1787.25	1582.25	1498	1385.5	1442.5	1282.5	1209.75
ENSMGAG00000002549	GJC2	gap junction protein gamma 2 [Source:HGNC Symbol;Acc:HGNC:17494]	364.5	487.25	440.5	241.5	380.25	173.75	320.5
ENSMGAG00000002551	IL13RA2	interleukin-13 receptor subunit alpha-2	57.5	133.5	100.25	533	335.75	1465	421.25
ENSMGAG00000002552	MYBBP1A	MYB binding protein 1a	618.75	574	601.75	524	539	508.5	423.25
ENSMGAG00000002553	C28H6orf89	chromosome 28 C6orf89 homolog	1153.5	1203.25	1126.75	1422.75	1303.5	1339.5	1265.25
ENSMGAG00000002554	B4GALNT4	beta-1,4-N-acetyl-galactosaminyltransferase 4 [Source:HGNC Symbol;Acc:HGNC:26315]	606.75	480.25	581.25	181.5	222	277	212.75
ENSMGAG00000002555	FAM110D	family with sequence similarity 110 member D	208.5	223.75	205.5	138.5	202.5	105	182.5
ENSMGAG00000002557	A4GNT	alpha-1,4-N-acetylglucosaminyltransferase [Source:HGNC Symbol;Acc:HGNC:17968]	0	0	0	0	0	0	0
ENSMGAG00000002559	TOR3A	torsin family 3 member A	61.25	75	80.75	77.75	95.5	50	70.75
ENSMGAG00000002561	LOC100539530	cyclin-dependent kinase 11B	2093.5	2029.75	1824.5	2227	1945.5	2140	1970.75
ENSMGAG00000002563	AACS	acetoacetyl-CoA synthetase [Source:HGNC Symbol;Acc:HGNC:21298]	437	438.5	470	544.25	556.25	439.75	457.75
ENSMGAG00000002565	EXOC3L1	exocyst complex component 3 like 1	99.75	87.75	92.5	76.75	74.5	56	72.75
ENSMGAG00000002567	HOXB1	homeobox B1	0	0	0	0	0	0	0
ENSMGAG00000002568	PDIK1L	PDLIM1 interacting kinase 1 like	152	161.25	131.5	161.5	167.75	136.75	174.75
ENSMGAG00000002569	GUK1	guanylate kinase 1 [Source:HGNC Symbol;Acc:HGNC:4693]	949.75	753.25	782.75	608.75	628.5	620	547
ENSMGAG00000002570	SH3GL1	SH3 domain containing GRB2 like 1, endophilin A2 [Source:HGNC Symbol;Acc:HGNC:10830]	1507.25	1454.25	1415.25	1268.25	1485.5	1014.5	1301.5
ENSMGAG00000002571	TPM2	Tropomyosin 2	4002.75	5501	5235	4341	5405	4724.75	4688.75
ENSMGAG00000002573	ABL2	ABL proto-oncogene 2, non-receptor tyrosine kinase	228.5	271.5	240.5	207.25	240.75	161.75	230.25
ENSMGAG00000002574	DENND6B	DENN domain containing 6B [Source:HGNC Symbol;Acc:HGNC:32690]	923	860.75	737.5	658.5	706.5	680.25	762.75
ENSMGAG00000002575	PDZD3	PDZ domain containing 3 [Source:HGNC Symbol;Acc:HGNC:19891]	62	55.5	49.75	55	41.5	35	44.5
ENSMGAG00000002576	TRIM63	tripartite motif containing 63 [Source:HGNC Symbol;Acc:HGNC:16007]	51	48	35.5	17.25	31.75	17.75	39.75
ENSMGAG00000002577	PI16	peptidase inhibitor 16	1237.25	1422.5	1369	430.5	725.75	442	735.25
ENSMGAG00000002578	ENSMGAG00000002578	C2H2-type domain-containing protein	507.5	590.5	481	315.25	372.5	318.25	442.75
ENSMGAG00000002579	WAPL	WAPL cohesin release factor [Source:HGNC Symbol;Acc:HGNC:23293]	1882	1895.25	1778.25	2103.25	1866.25	2034	1867.5
ENSMGAG00000002583	GSS	glutathione synthetase	1394.75	1496.75	1382.75	1464.75	1833.75	930	1206.75
ENSMGAG00000002585	NUDCD2	NudC domain containing 2 [Source:HGNC Symbol;Acc:HGNC:30535]	349.5	334	320.75	363.25	358.5	326.25	285.5
ENSMGAG00000002586	GPR75	G protein-coupled receptor 75	175.25	221.5	187.25	321.5	153.25	267.5	198.75
ENSMGAG00000002587	MTCH1	mitochondrial carrier 1	95.75	112.25	90.75	113.25	103.5	96.5	95.5
ENSMGAG00000002588	ENSMGAG00000002588	PHD-type domain-containing protein	86.25	98	77.5	81.25	80.5	52.75	81.5
ENSMGAG00000002589	NLRX1	NLR family member X1 [Source:HGNC Symbol;Acc:HGNC:29890]	457.75	460.5	444	271.75	347.25	253.75	317.25
ENSMGAG00000002590	PKP3	plakophilin 3	447.5	411.5	347.5	250.5	296.25	262.25	281.25
ENSMGAG00000002591	ANGPTL1	angiopoietin like 1	40	55.5	47.5	23.5	27.25	19.75	30
ENSMGAG00000002592	CLDN18	claudin 18	0	0	0	0	0	0	0
ENSMGAG00000002593	LOC100547897	lysosomal alpha-glucosidase-like	1043.75	1062.75	898.25	982.5	1183.75	785.5	972
ENSMGAG00000002594	ERLEC1	endoplasmic reticulum lectin 1	1478.5	1521.5	1537.25	2853.25	2165.25	2264.75	1937.5
ENSMGAG00000002595	PLS3	plastin 3	952	1154.5	1031.25	1165	1365.75	810.25	908.25
ENSMGAG00000002596	CCNG1	cyclin G1 [Source:HGNC Symbol;Acc:HGNC:1592]	642.25	585.75	579	512	620.75	540	533.25
ENSMGAG00000002597	RPL34	ribosomal protein L34	1461.75	1231.75	1398	1405	1265	1588.75	937.25
ENSMGAG00000002599	CTRL	chymotrypsin like	0	0	0	0.25	0	0	0
ENSMGAG00000002600	THY1	Thy-1 cell surface antigen [Source:HGNC Symbol;Acc:HGNC:11801]	537.75	675.75	634.25	303.5	472.5	257	466
ENSMGAG00000002602	RBM6	RNA binding motif protein 6	1096	1088.25	986.25	959.75	1001.75	998	955.25
ENSMGAG00000002604	SKAP1	src kinase associated phosphoprotein 1	14.75	11.75	14.25	11.25	7	9	10.25
ENSMGAG00000002605	RNF144B	ring finger protein 144B [Source:HGNC Symbol;Acc:HGNC:21578]	114	188.75	144.75	640.25	268.25	164.25	278.75
ENSMGAG00000002609	SIGIRR	single Ig and TIR domain containing	1113.5	1113	1001.75	594.25	1075.25	564.5	702.5
ENSMGAG00000002611	MMP23B	matrix metallopeptidase 23B	190.75	217.75	224.25	151.5	170.5	120.5	154.75
ENSMGAG00000002615	SOAT1	sterol O-acyltransferase 1 [Source:HGNC Symbol;Acc:HGNC:11177]	1596	2209.75	1813.25	3993.75	2129.5	3980.75	2524.25
ENSMGAG00000002616	CDK5RAP3	CDK5 regulatory subunit associated protein 3 [Source:HGNC Symbol;Acc:HGNC:18673]	883	922	817.5	1056.5	978.25	607.75	744
ENSMGAG00000002617	EDC3	enhancer of mRNA decapping 3	392	409.75	351	323.25	385.75	257	325.5
ENSMGAG00000002619	C1orf35	chromosome 1 open reading frame 35 [Source:HGNC Symbol;Acc:HGNC:19032]	0	0	0	0	0	0	0
ENSMGAG00000002620	SPP2	secreted phosphoprotein 2	6.75	3.75	2	1.25	0.5	0.75	0
ENSMGAG00000002621	MYH7B	myosin-7B	16	10	18.25	8.5	8	6.25	7
ENSMGAG00000002623	LOC100544185	lipase member M-like	0	0	0.25	0	0	0	0.25
ENSMGAG00000002624	ENSMGAG00000002624	Uncharacterized protein	0	0	0	0	0	0.25	0.5
ENSMGAG00000002625	BRI3BP	BRI3 binding protein	1529.75	1617.75	1531.25	1865.75	1922.75	1740.75	1633.5
ENSMGAG00000002627	TRPM8	transient receptor potential cation channel subfamily M member 8 [Source:HGNC Symbol;Acc:HGNC:17961]	11	6.5	13	5.75	2.5	1.75	2.5
ENSMGAG00000002628	SLC6A14	solute carrier family 6 member 14	2863.25	4773.25	3635.75	11328.8	3792.25	12358	6635.5
ENSMGAG00000002629	SLC30A2	solute carrier family 30 member 2	8.75	16.25	9	7.75	13.5	14.5	10.25
ENSMGAG00000002630	DHX37	DEAH-box helicase 37 [Source:HGNC Symbol;Acc:HGNC:17210]	1452	1342.25	1415.5	1351.5	1541.5	1466.25	1222.25
ENSMGAG00000002631	GCC1	GRIP and coiled-coil domain containing 1	416.5	439	399	388.5	430.75	326.5	349
ENSMGAG00000002633	ABCG4	ATP binding cassette subfamily G member 4 [Source:HGNC Symbol;Acc:HGNC:13884]	34	25.25	31.25	123.5	16	29.25	29.25
ENSMGAG00000002634	PSKH1	protein serine kinase H1	139.25	147	140.75	139.5	152.75	96.5	130
ENSMGAG00000002635	ARF1	ADP ribosylation factor 1	6564.25	6421.25	6237.75	6629.25	6642	5778.25	5567.5
ENSMGAG00000002636	CRYGS	crystallin gamma S	6.5	7.25	6.25	5.25	7	2.75	5.75
ENSMGAG00000002637	MIB2	Mindbomb E3 ubiquitin protein ligase 2	799.75	948.75	802	1122	1205	733	903.5
ENSMGAG00000002638	DEK	DEK proto-oncogene [Source:HGNC Symbol;Acc:HGNC:2768]	1164.75	904.5	936	955.75	930	962	837.25
ENSMGAG00000002639	CA9	carbonic anhydrase 9 [Source:HGNC Symbol;Acc:HGNC:1383]	294	193.25	238	162.5	106.5	108.5	94.25
ENSMGAG00000002641	GABRG2	gamma-aminobutyric acid type A receptor subunit gamma2 [Source:HGNC Symbol;Acc:HGNC:4087]	0.25	0	0	0	0	0	0.25
ENSMGAG00000002642	SEMA7A	semaphorin 7A (John Milton Hagen blood group) [Source:HGNC Symbol;Acc:HGNC:10741]	982.5	1458.5	1148	2270.5	2060	1900.25	1656.5
ENSMGAG00000002643	VPS51	VPS51 subunit of GARP complex	659	676.25	658.5	590	701.75	444.25	557
ENSMGAG00000002644	LOC100540135	enhancer of mRNA-decapping protein 4-like	878.5	960	908	828	898.25	779.5	863
ENSMGAG00000002646	MAFK	MAF bZIP transcription factor K [Source:HGNC Symbol;Acc:HGNC:6782]	335	349.25	323	342	416.5	377.75	397.5
ENSMGAG00000002648	WNT3A	Wnt family member 3A [Source:HGNC Symbol;Acc:HGNC:15983]	0	0	0	0	0	0.75	0
ENSMGAG00000002649	SPNS3	protein spinster homolog 3	32.5	26.25	27.5	15.75	14.75	12.75	10.25
ENSMGAG00000002650	PLEKHA6	pleckstrin homology domain containing A6 [Source:HGNC Symbol;Acc:HGNC:17053]	2158.5	2382	2057.75	1257.75	2220.5	1134.5	1775.25
ENSMGAG00000002651	SH3RF1	SH3 domain containing ring finger 1 [Source:HGNC Symbol;Acc:HGNC:17650]	393.75	371.5	334.75	270	403.25	310.5	387.75
ENSMGAG00000002652	NRF1	nuclear respiratory factor 1 [Source:HGNC Symbol;Acc:HGNC:7996]	274	275.5	244	203.5	231	227.25	219.25
ENSMGAG00000002653	TBCCD1	TBCC domain containing 1	558.25	554.75	543.25	477.75	451.25	481.75	395
ENSMGAG00000002654	ENSMGAG00000002654	Uncharacterized protein	646.25	560	585.75	464.75	495.5	332	392.5
ENSMGAG00000002655	HPS6	HPS6 biogenesis of lysosomal organelles complex 2 subunit 3 [Source:HGNC Symbol;Acc:HGNC:18817]	674	762.5	664.25	792.5	915	620.5	704.25
ENSMGAG00000002656	TMEM184A	transmembrane protein 184A	665.75	667.75	597	532	944	350	693.75
ENSMGAG00000002657	LOC100550264	proto-oncogene tyrosine-protein kinase Yrk	192	206	175.5	117.75	124.75	87.5	111.5
ENSMGAG00000002658	EXTL1	exostosin like glycosyltransferase 1	113	152.75	109.5	178.25	176.75	137	170.25
ENSMGAG00000002659	LOC100546355	prominin-1-A-like	1430.75	1276.25	1165.5	556.75	746	799.5	955.75
ENSMGAG00000002660	AXDND1	Axonemal dynein light chain domain containing 1	1	1	0.75	2.75	1.25	1	0.5
ENSMGAG00000002661	LOC104912152	protein FAM162B-like	720.25	748.75	661	373	693	453	485.75
ENSMGAG00000002662	DNAJB11	DnaJ heat shock protein family (Hsp40) member B11	1643.75	1540	1510.75	2115.5	1960.5	1591.5	1467.5
ENSMGAG00000002663	CHAC2	Gamma-glutamylcyclotransferase (EC 4.3.2.7)	28	25.25	22.5	41.75	25.25	37.5	34.75
ENSMGAG00000002665	CYP11A1	cytochrome P450 family 11 subfamily A member 1 [Source:HGNC Symbol;Acc:HGNC:2590]	24	14.25	19.5	8	19.25	9.25	12
ENSMGAG00000002666	KLHL13	kelch-like protein 13	823.5	796.25	724.75	632	713.25	675.75	765.75
ENSMGAG00000002667	SNAP47	synaptosome associated protein 47 [Source:HGNC Symbol;Acc:HGNC:30669]	260	259.25	222.25	253.5	244	186.5	209.5
ENSMGAG00000002668	KDM1B	lysine demethylase 1B [Source:HGNC Symbol;Acc:HGNC:21577]	478.5	532.75	415.5	739.25	520.5	447.25	444
ENSMGAG00000002669	ASB3	ankyrin repeat and SOCS box containing 3	180.75	200.25	175	180	172.5	161.75	182.5
ENSMGAG00000002670	PNPO	pyridoxamine 5'-phosphate oxidase [Source:HGNC Symbol;Acc:HGNC:30260]	312.25	271.75	233	230.5	220	171	171.5
ENSMGAG00000002672	PSMG3	proteasome assembly chaperone 3 [Source:HGNC Symbol;Acc:HGNC:22420]	322.25	292.25	282.5	224.5	302	248.5	203.25
ENSMGAG00000002674	SNRPE	small nuclear ribonucleoprotein polypeptide E	681.75	579.75	667.5	582.25	568.75	647.75	478.75
ENSMGAG00000002675	SCARB1	scavenger receptor class B member 1 [Source:HGNC Symbol;Acc:HGNC:1664]	511.5	559	553.5	603	617	579.25	621.25
ENSMGAG00000002676	LOC100550262	hippocampus abundant transcript 1 protein-like	1200.5	1184	1179.25	1268	1294.25	1079.75	1088.5
ENSMGAG00000002677	MAD1L1	mitotic arrest deficient 1 like 1	107	115	95.25	98.25	96.5	100.5	101.25
ENSMGAG00000002678	JMJD4	jumonji domain containing 4 [Source:HGNC Symbol;Acc:HGNC:25724]	206.75	222	221.75	213.5	218.25	181	173.5
ENSMGAG00000002679	TPMT	thiopurine S-methyltransferase [Source:HGNC Symbol;Acc:HGNC:12014]	652	611.5	529	809.75	635.75	584.5	535.75
ENSMGAG00000002680	BET1L	Bet1 golgi vesicular membrane trafficking protein like	335.75	383.5	345.25	328.25	341.5	291.75	300.5
ENSMGAG00000002681	LOC100550826	phospholipid-transporting ATPase ID-like	1486.75	2040.25	1829.25	4319.5	2324.75	7321.5	3591
ENSMGAG00000002682	HINFP	histone H4 transcription factor [Source:HGNC Symbol;Acc:HGNC:17850]	254.75	229.25	229.25	867	254.75	277	203.25
ENSMGAG00000002684	CBR4	carbonyl reductase 4 [Source:HGNC Symbol;Acc:HGNC:25891]	218.5	214	195.25	216	234.25	286	227
ENSMGAG00000002686	STRIP2	striatin interacting protein 2 [Source:HGNC Symbol;Acc:HGNC:22209]	4.75	4	6.75	4	3.5	6	9
ENSMGAG00000002687	MON1A	MON1 homolog A, secretory trafficking associated	647.5	670	624.5	609.75	703.25	516.75	551.5
ENSMGAG00000002690	ALS2CL	ALS2 C-terminal like [Source:HGNC Symbol;Acc:HGNC:20605]	262.5	231.75	211.25	180	192.5	149	180
ENSMGAG00000002691	ANO9	anoctamin 9 [Source:HGNC Symbol;Acc:HGNC:20679]	242.75	259.5	232.5	81.25	154.25	196.5	180.25
ENSMGAG00000002692	LOC104911898	serine-rich coiled-coil domain-containing protein 2-like	62	73.75	71.5	112.5	84.25	62	87.25
ENSMGAG00000002693	PROCR	protein C receptor	30.5	43	35	21.5	47.5	10.25	21
ENSMGAG00000002694	KIF13A	kinesin family member 13A [Source:HGNC Symbol;Acc:HGNC:14566]	1166.25	1254.75	1146.25	1316.5	1307.5	1034.25	1284.25
ENSMGAG00000002696	MRPL45	mitochondrial ribosomal protein L45	1271.75	1122.25	1063.25	1028.5	1090	1044	971.25
ENSMGAG00000002698	DHFR	dihydrofolate reductase	159	147.75	184.75	144	129	122.25	122.25
ENSMGAG00000002699	PFKL	phosphofructokinase, liver type	665.5	643	608.25	451.75	536.5	320.5	421.75
ENSMGAG00000002700	NUDT1	Nudix hydrolase 1	81.25	42.5	68.25	43	41	57	34.5
ENSMGAG00000002701	REN	renin [Source:HGNC Symbol;Acc:HGNC:9958]	3	1.5	2.5	1.75	4.5	0.75	0.75
ENSMGAG00000002702	SSU72	SSU72 homolog, RNA polymerase II CTD phosphatase	1434.75	1436	1371.25	1796	1710.5	1701.25	1404
ENSMGAG00000002703	PCDH18	protocadherin 18 [Source:HGNC Symbol;Acc:HGNC:14268]	524.5	549.75	541.75	257.75	442.25	337	316.25
ENSMGAG00000002704	GABRA1	gamma-aminobutyric acid type A receptor subunit alpha1 [Source:HGNC Symbol;Acc:HGNC:4075]	4.75	1.75	3.75	0.5	2	1	3.75
ENSMGAG00000002705	MALL	mal, T-cell differentiation protein like	215	212.5	221	419	479	176.25	294.5
ENSMGAG00000002706	SNX8	sorting nexin 8	62.5	75.75	73.25	102.5	71.25	46	48.5
ENSMGAG00000002707	NUTF2	nuclear transport factor 2	612.25	650.5	698.25	579.75	705.5	563	535
ENSMGAG00000002708	CHAF1A	chromatin assembly factor 1 subunit A	759.25	566	566.75	456.5	436.5	487.75	441
ENSMGAG00000002709	ENSMGAG00000002709	Uncharacterized protein	9.75	14.25	6.25	9.5	6	6.5	4
ENSMGAG00000002710	MST1R	macrophage stimulating 1 receptor	392.75	405	362.25	396.25	537.75	278.25	315.25
ENSMGAG00000002711	PAFAH2	platelet activating factor acetylhydrolase 2	225.5	268.25	215	150.5	267.5	203	218.25
ENSMGAG00000002713	NFKBID	POU class 2 homeobox associating factor 1	55.5	37.75	34.75	63	50.5	36.5	34.75
ENSMGAG00000002714	NPEPPS	aminopeptidase puromycin sensitive	2508.25	2716	2553.25	3487.5	2751	3069.5	2737
ENSMGAG00000002715	LOC100546809	protein NDNF-like	15.5	14.5	11.75	3.5	5.75	5	6.25
ENSMGAG00000002717	WDR44	WD repeat domain 44 [Source:HGNC Symbol;Acc:HGNC:30512]	1123.5	1056.5	1091.25	1125.25	1134	1092.5	1031.25
ENSMGAG00000002718	LYRM7	LYR motif containing 7	329.5	275.5	305.25	307.5	255.25	310.75	233
ENSMGAG00000002719	EIF3B	eukaryotic translation initiation factor 3 subunit B	2902	2531.75	2629.25	2221.5	2221.25	2114.25	1868
ENSMGAG00000002720	NFIC	Nuclear factor I C	684.75	627	676.25	321.25	397.75	159	268
ENSMGAG00000002721	UBE2G1	ubiquitin conjugating enzyme E2 G1	742.75	732.5	676.25	809.25	787.75	855	681
ENSMGAG00000002725	spdef	SAM pointed domain containing ETS transcription factor	604.25	867.25	646.75	1115.75	900.5	968	714.5
ENSMGAG00000002726	SLC7A11	solute carrier family 7 member 11 [Source:HGNC Symbol;Acc:HGNC:11059]	794.5	962	672.75	528.75	516	215.75	438.5
ENSMGAG00000002728	FAM20B	FAM20B glycosaminoglycan xylosylkinase [Source:HGNC Symbol;Acc:HGNC:23017]	632.75	613	516.25	444.25	486.75	307.25	450.25
ENSMGAG00000002729	BICC1	BicC family RNA binding protein 1 [Source:HGNC Symbol;Acc:HGNC:19351]	360.5	416.5	421.5	436.5	375.5	293	380
ENSMGAG00000002730	SYT12	synaptotagmin 12	9.25	21.5	23	55.5	31	72	48.5
ENSMGAG00000002731	MYL3	myosin light chain 3 [Source:HGNC Symbol;Acc:HGNC:7584]	1.5	1	1	0	0	0	0
ENSMGAG00000002732	PACSIN1	protein kinase C and casein kinase substrate in neurons 1	116.5	113.5	108.25	83	69.75	60	65.75
ENSMGAG00000002734	NPHP1	nephrocystin 1	648.75	565.5	517	479.5	464.75	529.75	496.25
ENSMGAG00000002735	LMF2	lipase maturation factor 2 [Source:HGNC Symbol;Acc:HGNC:25096]	2873.25	3059.5	3133	2750.5	3234.25	1822.75	2642.25
ENSMGAG00000002736	TMEM240	transmembrane protein 240 [Source:HGNC Symbol;Acc:HGNC:25186]	6.25	0.25	3.25	2	3.25	0.75	4
ENSMGAG00000002737	KMT2A	lysine methyltransferase 2A	1126.5	1443.25	1244.5	1339	1248.5	1101.5	1293
ENSMGAG00000002738	WHRN	Whirlin	305	243.5	197.75	140	176.75	219.25	226.75
ENSMGAG00000002740	ATAD3A	ATPase family AAA domain containing 3A [Source:HGNC Symbol;Acc:HGNC:25567]	904.75	833	837.75	824.75	921.75	756	700.75
ENSMGAG00000002741	CX3CL1	C-X3-C motif chemokine ligand 1	1182.25	1279.5	1071.75	670.25	975.75	1098.25	1066
ENSMGAG00000002742	MIOX	myo-inositol oxygenase [Source:HGNC Symbol;Acc:HGNC:14522]	0.75	3	1.25	21.75	3	0.75	1
ENSMGAG00000002743	STXBP1	syntaxin binding protein 1	1079.5	1175.75	1043.5	1131	1117.75	863.25	1051.5
ENSMGAG00000002744	TSNAXIP1	translin associated factor X interacting protein 1	1132.5	1032.75	875.5	531.75	570.5	694	702
ENSMGAG00000002746	AHCYL2	adenosylhomocysteinase like 2 [Source:HGNC Symbol;Acc:HGNC:22204]	1515.75	1369.5	1291	1816.25	1883	1066	1212
ENSMGAG00000002747	NPHS2	NPHS2, podocin	0	0	0	0	0	0	0
ENSMGAG00000002748	LOC104913500	galanin receptor type 1-like	0	0	0	0	0	0	0
ENSMGAG00000002749	CLK3	CDC like kinase 3 [Source:HGNC Symbol;Acc:HGNC:2071]	599.75	611.75	516.75	573.25	555.75	572	573
ENSMGAG00000002750	GABRA6	gamma-aminobutyric acid type A receptor subunit alpha6 [Source:HGNC Symbol;Acc:HGNC:4080]	0	0	0	0	0	0	0
ENSMGAG00000002751	ANKFY1	ankyrin repeat and FYVE domain containing 1	1003.5	1114	1058	1230.5	1198.25	950.25	1131.5
ENSMGAG00000002752	CREB3L3	cAMP responsive element binding protein 3 like 3 [Source:HGNC Symbol;Acc:HGNC:18855]	6.5	5.25	4.75	10.75	8.5	5.75	4.75
ENSMGAG00000002754	LOC104913429	grifin-like	0	0	0	0	0	0	0
ENSMGAG00000002756	RPS10	ribosomal protein S10	12331.5	10208.8	10725.5	9890.5	9542.25	9861.25	7225.25
ENSMGAG00000002757	LFNG	LFNG O-fucosylpeptide 3-beta-N-acetylglucosaminyltransferase	330.75	334.75	319.25	287.75	312.75	221.5	248
ENSMGAG00000002758	VWA1	von Willebrand factor A domain containing 1	2288.25	2284.75	2414.5	1884.75	2295.5	1174.5	1486.25
ENSMGAG00000002759	LOC100545133	receptor-type tyrosine-protein phosphatase T	0.75	0.75	0	25.75	4.75	2.75	4.25
ENSMGAG00000002760	PLLP	Plasmolipin	21.75	25.75	14.25	15	12.25	14.5	20.5
ENSMGAG00000002761	SIRT5	sirtuin 5 [Source:HGNC Symbol;Acc:HGNC:14933]	251.5	232.25	226.75	237.5	206.5	204	244.25
ENSMGAG00000002763	GABRB2	gamma-aminobutyric acid type A receptor subunit beta2 [Source:HGNC Symbol;Acc:HGNC:4082]	0.75	0	0.5	0	0	0	0
ENSMGAG00000002765	ENSMGAG00000002765	POU domain protein	1.75	2.25	2.75	0.25	0.5	1.75	1.25
ENSMGAG00000002766	ASB18	ankyrin repeat and SOCS box containing 18 [Source:HGNC Symbol;Acc:HGNC:19770]	0	0.75	0.25	0	0	0.25	1.75
ENSMGAG00000002767	PTH1R	parathyroid hormone 1 receptor [Source:HGNC Symbol;Acc:HGNC:9608]	12	24	12.25	15.5	1.75	8	19.25
ENSMGAG00000002768	ETNK2	ethanolamine kinase 2	9.25	10	12.5	12.25	11	8.25	10.25
ENSMGAG00000002769	PTDSS2	phosphatidylserine synthase 2 [Source:HGNC Symbol;Acc:HGNC:15463]	370.75	415	358	508	409	407.75	425.25
ENSMGAG00000002770	LOC104914605	importin subunit beta-1	1145.5	1125.25	1086.25	948.25	949.75	747.5	829.75
ENSMGAG00000002771	ENSMGAG00000002771	Uncharacterized protein	20.25	28.25	22.25	124.25	132.75	17.75	35.75
ENSMGAG00000002772	PHYHIPL	Phytanoyl-CoA 2-hydroxylase interacting protein like	658.25	682	646	435	505	674.75	618
ENSMGAG00000002773	ARL2BP	ADP ribosylation factor like GTPase 2 binding protein	292	275.25	248.75	183.75	219.25	208	190.5
ENSMGAG00000002775	UBXN6	UBX domain protein 6	697.75	770.5	712.5	910.5	882	983	852.75
ENSMGAG00000002776	FAM163A	family with sequence similarity 163 member A	0	0.5	0	0	0	0.25	0.25
ENSMGAG00000002777	STMN1	stathmin 1	3477.75	1788.75	2455.5	411.25	455.5	686	395.25
ENSMGAG00000002778	NOCT	nocturnin [Source:HGNC Symbol;Acc:HGNC:14254]	206.75	255.5	219.25	275.25	164.5	296.75	194
ENSMGAG00000002780	LOC100544972	ADAMTS-like protein 2	379.25	370	355.75	191.75	269.5	157.75	300.5
ENSMGAG00000002781	SMO	smoothened, frizzled class receptor [Source:HGNC Symbol;Acc:HGNC:11119]	1429	1308.75	1421.75	977	1167	853.5	997
ENSMGAG00000002783	NUDT3	Nudix hydrolase 3	139.75	116.75	131.5	140.5	121.25	111.75	128.5
ENSMGAG00000002784	CCNL2	cyclin-L1	2832	2631.25	2476	2939.75	2186.75	2572.75	2427.5
ENSMGAG00000002785	FAM13C	Family with sequence similarity 13 member C	66.5	106	109.75	122.5	149	69	116
ENSMGAG00000002786	TTYH3	Protein tweety homolog	53.75	63	48.25	72.25	60.25	58	52.25
ENSMGAG00000002787	RANBP10	RAN binding protein 10	739.75	811.5	717.5	1025	811.5	729	737.25
ENSMGAG00000002788	RUSC2	RUN and SH3 domain containing 2	60.25	104.25	93.75	126.25	128	95	172.75
ENSMGAG00000002789	LOC100546568	semaphorin-3D-like	251.75	197	209.5	119	132.25	78.75	100.75
ENSMGAG00000002791	ELF2	E74 like ETS transcription factor 2 [Source:HGNC Symbol;Acc:HGNC:3317]	820.5	755.75	770.25	699.25	649.5	674	636.25
ENSMGAG00000002792	IGHMBP2	immunoglobulin mu binding protein 2	233.5	250	217.5	196.5	217	168.75	219
ENSMGAG00000002794	RANBP9	RAN binding protein 9 [Source:HGNC Symbol;Acc:HGNC:13727]	1967	1943.75	1752.75	2012.5	1657.5	2228	2015.25
ENSMGAG00000002796	ENSMGAG00000002796	PP1c_bdg domain-containing protein	636	643	529.75	721.25	621.75	582.25	551
ENSMGAG00000002797	DOCK11	dedicator of cytokinesis 11 [Source:HGNC Symbol;Acc:HGNC:23483]	599	647.25	664.5	418.5	524.5	391.25	559.75
ENSMGAG00000002802	PLEKHA2	pleckstrin homology domain containing A2 [Source:HGNC Symbol;Acc:HGNC:14336]	312.5	316.75	290.5	229	286.25	177	231.75
ENSMGAG00000002803	PIK3C2B	phosphatidylinositol-4-phosphate 3-kinase catalytic subunit type 2 beta	1349.25	1435.25	1252.5	952.25	1339.75	992	1319
ENSMGAG00000002804	ENSMGAG00000002804	Uncharacterized protein	91.5	98.5	95.25	80.75	113	58.5	79.5
ENSMGAG00000002805	ARID3B	AT-rich interaction domain 3B [Source:HGNC Symbol;Acc:HGNC:14350]	614	711	563.25	525	625	338	558.75
ENSMGAG00000002806	ATP10B	ATPase phospholipid transporting 10B (putative) [Source:HGNC Symbol;Acc:HGNC:13543]	41	40	46.5	15.75	17	11	14.75
ENSMGAG00000002807	RSPRY1	ring finger and SPRY domain containing 1	916.5	936	861.5	967.25	863.75	1132.25	984
ENSMGAG00000002809	PAQR7	progestin and adipoQ receptor family member 7	70.25	68.5	91	27.25	53.75	30.5	31.5
ENSMGAG00000002810	LOC104914146	uncharacterized oxidoreductase C663.09c-like	16.75	18.75	25	93	74.25	259.25	98
ENSMGAG00000002811	LOC100545311	two pore calcium channel protein 2-like	364	393.75	380.25	378	429.25	359.25	351.5
ENSMGAG00000002812	ZZEF1	Zinc finger ZZ-type and EF-hand domain containing 1	997	1167	1018.75	1332.25	1233.5	1029.5	1088.75
ENSMGAG00000002813	CEP350	centrosomal protein 350	1464	1531	1205.75	1502.25	1269.5	1202.25	1341.5
ENSMGAG00000002814	MRPL21	mitochondrial ribosomal protein L21	369.75	336	322	338.25	343.25	311.5	263.25
ENSMGAG00000002815	CCDC12	coiled-coil domain containing 12 [Source:HGNC Symbol;Acc:HGNC:28332]	758.5	673.5	649.25	530.5	569.5	543.5	561
[truncated: 15,971 more rows]
