# Supplementary material for: Prolonged repeated inseminations trigger a local immune response and accelerate aging of the uterovaginal junction in turkey hens
Source: Front Physiol. 2023 Nov 22;14:1275922. doi: 10.3389/fphys.2023.1275922 (PMC10703162; doi:10.3389/fphys.2023.1275922)
Supplement: Supplementary file 2 [file Table1.XLSX]

## Sheet: Semen_Peak_Sham_Peak
Regulation	Ensembl ID	log2 Fold Change	Adj.Pval	Gene ID	Gene description	Chr	Type
Up	ENSMGAG00000022374	17.1906	0.000135	LOC104909332	deleted in malignant brain tumors 1 protein-like	8	protein_coding
Up	ENSMGAG00000003445	10.0128	0.00105	ELOVL2	ELOVL fatty acid elongase 2 [Source:HGNC Symbol;Acc:HGNC:14416]	3	protein_coding
Up	ENSMGAG00000016855	5.75257	0.0232	ENSMGAG00000016855	Uncharacterized protein	2	protein_coding
Up	ENSMGAG00000005069	5.68837	0.032	LOC100542248	protein-glutamine gamma-glutamyltransferase E-like	22	protein_coding
Up	ENSMGAG00000004371	4.97195	0.0279	NCAN	neurocan	30	pseudogene
Up	ENSMGAG00000002297	4.94431	0.000696	SALL3	spalt like transcription factor 3 [Source:HGNC Symbol;Acc:HGNC:10527]	3	protein_coding
Up	ENSMGAG00000010778	4.20421	0.0366	ENSMGAG00000010778	Uncharacterized protein	KN389552.1	protein_coding
Up	ENSMGAG00000008102	4.16457	0.0218	LECT2	leukocyte cell derived chemotaxin 2	15	protein_coding
Up	ENSMGAG00000002969	3.93443	0.0235	LOC104911326	cathelicidin-3	6	protein_coding
Up	ENSMGAG00000017565	3.79868	0.0415	ENSMGAG00000017565	lncRNA	25	lncRNA
Up	ENSMGAG00000010576	3.76251	0.0186	LOC100546345	astacin-like metalloendopeptidase	5	protein_coding
Up	ENSMGAG00000018628	3.65247	0.0206	ENSMGAG00000018628	novel protein coding gene	7	protein_coding
Up	ENSMGAG00000011103	3.55191	0.0252	PPFIA2	PTPRF interacting protein alpha 2	1	protein_coding
Up	ENSMGAG00000014795	3.38536	0.0286	ENSMGAG00000014795	Uncharacterized protein	1	protein_coding
Up	ENSMGAG00000020589	3.30212	0.00443	ENSMGAG00000020589	novel protein coding gene	7	protein_coding
Up	ENSMGAG00000014828	3.20102	0.0493	SULT1C3	sulfotransferase family 1C member 3 [Source:HGNC Symbol;Acc:HGNC:33543]	1	protein_coding
Up	ENSMGAG00000007531	2.6914	0.0113	HDC	histidine decarboxylase [Source:HGNC Symbol;Acc:HGNC:4855]	12	protein_coding
Up	ENSMGAG00000011785	2.48713	0.0356	clrn3	clarin 3	8	protein_coding
Up	ENSMGAG00000006134	2.37596	0.0219	BHLHE23	basic helix-loop-helix family member e23	22	protein_coding
Up	ENSMGAG00000004714	2.37253	0.0177	SERPINB5	serpin family B member 5 [Source:HGNC Symbol;Acc:HGNC:8949]	3	protein_coding
Up	ENSMGAG00000011865	2.33697	0.0324	LOC100540823	retinoic acid-induced protein 3-like	1	protein_coding
Up	ENSMGAG00000006241	2.24476	0.00762	LOC100548925	DEP domain-containing mTOR-interacting protein-like	22	protein_coding
Up	ENSMGAG00000005407	2.08379	0.033	CAPN13	calpain 13	2	protein_coding
Up	ENSMGAG00000002340	2.0469	0.00777	ATP8B3	ATPase phospholipid transporting 8B3	30	protein_coding
Up	ENSMGAG00000013464	2.03531	0.046	ENSMGAG00000013464	Clathrin_bdg domain-containing protein	5	protein_coding
Up	ENSMGAG00000000890	2.00844	0.0276	LOC100545191	neurofascin	28	protein_coding
Up	ENSMGAG00000014826	1.96287	0.0286	ST6GAL2	ST6 beta-galactoside alpha-2,6-sialyltransferase 2 [Source:HGNC Symbol;Acc:HGNC:10861]	1	protein_coding
Up	ENSMGAG00000009281	1.8906	0.017	BCAS1	brain enriched myelin associated protein 1 [Source:HGNC Symbol;Acc:HGNC:974]	22	protein_coding
Up	ENSMGAG00000008579	1.88274	0.0252	PTPRZ1	protein tyrosine phosphatase receptor type Z1 [Source:HGNC Symbol;Acc:HGNC:9685]	1	protein_coding
Up	ENSMGAG00000001791	1.84374	0.0119	ENSMGAG00000001791	SCY domain-containing protein	21	protein_coding
Up	ENSMGAG00000019620	1.84213	0.00102	LOC100549193	pseudouridine-metabolizing bifunctional protein C1861.05-like [ Meleagris gallopavo (turkey) ]	1	protein_coding
Up	ENSMGAG00000006490	1.83029	2.92e-05	LOC100549696	peroxidasin homolog	22	protein_coding
Up	ENSMGAG00000005902	1.81918	7.13e-05	MSMP	microseminoprotein, prostate associated [Source:HGNC Symbol;Acc:HGNC:29663]	Z	protein_coding
Up	ENSMGAG00000009973	1.80794	0.0287	NTN3	netrin 3 [Source:HGNC Symbol;Acc:HGNC:8030]	16	protein_coding
Up	ENSMGAG00000002440	1.79061	0.00131	GDPD2	glycerophosphodiester phosphodiesterase domain containing 2	9	protein_coding
Up	ENSMGAG00000018305	1.7853	0.0183	ENSMGAG00000018305	novel protein coding gene	16	protein_coding
Up	ENSMGAG00000017084	1.78516	0.0309	RHOBTB3	Rho related BTB domain containing 3 [Source:HGNC Symbol;Acc:HGNC:18757]	Z	protein_coding
Up	ENSMGAG00000009967	1.76142	0.0482	LOC100544640	protein MRP-126	KN387565.1	protein_coding
Up	ENSMGAG00000019011	1.75284	0.0439	ENSMGAG00000019011	lncRNA	30	lncRNA
Up	ENSMGAG00000016506	1.74201	0.00947	ENSMGAG00000016506	Uncharacterized protein	10	protein_coding
Up	ENSMGAG00000001548	1.73772	0.0469	ENSMGAG00000001548	Uncharacterized protein	19	protein_coding
Up	ENSMGAG00000020964	1.73756	0.033	ENSMGAG00000020964	novel protein coding gene	15	protein_coding
Up	ENSMGAG00000010729	1.71086	0.0468	CREB5	cAMP responsive element binding protein 5	6	protein_coding
Up	ENSMGAG00000002374	1.67373	0.00766	ENSMGAG00000002374	MACPF domain-containing protein	10	protein_coding
Up	ENSMGAG00000016464	1.65947	0.0393	ENSMGAG00000016464	Uncharacterized protein	14	protein_coding
Up	ENSMGAG00000003314	1.65055	0.00635	Rnf223	ring finger protein 223	23	protein_coding
Up	ENSMGAG00000013796	1.64586	0.0192	PARVB	parvin beta [Source:HGNC Symbol;Acc:HGNC:14653]	1	protein_coding
Up	ENSMGAG00000006543	1.63941	0.0191	ARSI	arylsulfatase family member I	15	protein_coding
Up	ENSMGAG00000022376	1.56242	0.0295	ENSMGAG00000022376	novel protein coding gene	ADDD02199392.1	protein_coding
Up	ENSMGAG00000001115	1.53899	0.00371	ENSMGAG00000001115	receptor-type tyrosine-protein phosphatase V-like	28	protein_coding
Up	ENSMGAG00000007924	1.53044	0.0237	LHX1	LIM homeobox 1	21	protein_coding
Up	ENSMGAG00000021528	1.51557	0.00666	ENSMGAG00000021528	novel protein coding gene	KN387443.1	protein_coding
Up	ENSMGAG00000006493	1.50288	0.00975	SDK2	sidekick cell adhesion molecule 2	20	protein_coding
Up	ENSMGAG00000009354	1.50113	0.0262	KCNG1	potassium voltage-gated channel modifier subfamily G member 1	22	protein_coding
Up	ENSMGAG00000004165	1.48998	0.0417	CYGB	cytoglobin [Source:HGNC Symbol;Acc:HGNC:16505]	20	protein_coding
Up	ENSMGAG00000001972	1.4886	0.00227	CRABP2	cellular retinoic acid binding protein 2 [Source:HGNC Symbol;Acc:HGNC:2339]	27	protein_coding
Up	ENSMGAG00000019264	1.48121	0.0338	ENSMGAG00000019264	mitotic spindle positioning [Source:NCBI gene;Acc:420097] ortholog	30	protein_coding
Up	ENSMGAG00000018129	1.47713	0.0326	LOC104914090	neurofilament heavy polypeptide-like	22	protein_coding
Up	ENSMGAG00000017636	1.4712	0.0351	ENSMGAG00000017636	novel protein coding gene	11	protein_coding
Up	ENSMGAG00000001307	1.44927	0.000206	FA2H	Fatty acid 2-hydroxylase (EC 1.-.-.-)	13	protein_coding
Up	ENSMGAG00000014125	1.44736	0.0104	SCARA3	scavenger receptor class A member 3 [Source:HGNC Symbol;Acc:HGNC:19000]	2	protein_coding
Up	ENSMGAG00000015034	1.44205	0.00448	THSD1	thrombospondin type 1 domain containing 1 [Source:HGNC Symbol;Acc:HGNC:17754]	1	protein_coding
Up	ENSMGAG00000020513	1.43561	0.00831	ENSMGAG00000020513	lncRNA	3	lncRNA
Up	ENSMGAG00000010009	1.428	0.0104	ETV1	ETS variant transcription factor 1 [Source:HGNC Symbol;Acc:HGNC:3490]	6	protein_coding
Up	ENSMGAG00000017267	1.41079	6.17e-05	KRTCAP3	keratinocyte associated protein 3 [Source:HGNC Symbol;Acc:HGNC:28943]	2	protein_coding
Up	ENSMGAG00000002272	1.3934	0.0128	SFRP1	secreted frizzled related protein 1 [Source:HGNC Symbol;Acc:HGNC:10776]	24	protein_coding
Up	ENSMGAG00000017042	1.39236	0.00781	ENSMGAG00000017042	Monocyte differentiation antigen CD14 (Myeloid cell-specific leucine-rich glycoprotein)	15	protein_coding
Up	ENSMGAG00000021023	1.38676	0.014	IGFBP5	insulin like growth factor binding protein 5 [Source:NCBI gene;Acc:424220] ortholog	7	protein_coding
Up	ENSMGAG00000007612	1.3863	0.012	ENSMGAG00000007612	Uncharacterized protein	13	protein_coding
Up	ENSMGAG00000010829	1.3848	0.0317	SLC5A9	solute carrier family 5 member 9	10	protein_coding
Up	ENSMGAG00000012401	1.38205	0.023	ENSMGAG00000012401	Proprotein convertase subtilisin/kexin type 1	KN388337.1	protein_coding
Up	ENSMGAG00000014696	1.37899	0.0104	ASB9	ankyrin repeat and SOCS box containing 9 [Source:HGNC Symbol;Acc:HGNC:17184]	1	protein_coding
Up	ENSMGAG00000016167	1.37198	0.0316	KCNJ15	potassium inwardly rectifying channel subfamily J member 15 [Source:HGNC Symbol;Acc:HGNC:6261]	1	protein_coding
Up	ENSMGAG00000000941	1.36335	0.00102	GNAO1	G protein subunit alpha o1	13	protein_coding
Up	ENSMGAG00000003378	1.35561	0.0179	FSTL3	follistatin like 3 [Source:HGNC Symbol;Acc:HGNC:3973]	30	protein_coding
Up	ENSMGAG00000020173	1.34032	0.00082	ENSMGAG00000020173	novel protein coding gene	KN389086.1	protein_coding
Up	ENSMGAG00000015055	1.33105	0.0214	ENSMGAG00000015055	KRAB domain-containing protein	KN389536.1	protein_coding
Up	ENSMGAG00000007003	1.32688	0.00102	ESPN	Espin	23	protein_coding
Up	ENSMGAG00000006788	1.3207	0.00744	WNT4	Wnt family member 4	23	protein_coding
Up	ENSMGAG00000001317	1.31428	0.0232	LIPG	lipase G, endothelial type [Source:HGNC Symbol;Acc:HGNC:6623]	11	protein_coding
Up	ENSMGAG00000001969	1.31415	0.0381	UBASH3B	ubiquitin associated and SH3 domain containing B [Source:HGNC Symbol;Acc:HGNC:29884]	26	protein_coding
Up	ENSMGAG00000002027	1.31265	0.0207	PKP1	plakophilin 1 [Source:HGNC Symbol;Acc:HGNC:9023]	28	protein_coding
Up	ENSMGAG00000003450	1.29928	0.0126	BOK	BCL2 family apoptosis regulator BOK [Source:HGNC Symbol;Acc:HGNC:1087]	11	protein_coding
Up	ENSMGAG00000003016	1.29826	0.0316	FBLN7	fibulin 7	2	protein_coding
Up	ENSMGAG00000006123	1.28336	0.014	LOC100546979	solute carrier family 17 member 9-like	22	protein_coding
Up	ENSMGAG00000018338	1.27945	0.00113	BHLHE40	basic helix-loop-helix family member e40 [Source:HGNC Symbol;Acc:HGNC:1046]	14	protein_coding
Up	ENSMGAG00000005776	1.26984	0.0338	SLCO4A1	solute carrier organic anion transporter family member 4A1	22	protein_coding
Up	ENSMGAG00000010203	1.25923	0.0472	KAZALD1	Kazal type serine peptidase inhibitor domain 1 [Source:HGNC Symbol;Acc:HGNC:25460]	8	protein_coding
Up	ENSMGAG00000017735	1.22723	0.00681	SLC7A5	solute carrier family 7 member 5 [Source:NCBI gene;Acc:415832] ortholog	13	protein_coding
Up	ENSMGAG00000022703	1.20671	0.0252	LOC104910021	uncharacterized LOC104910021	2	protein_coding
Up	ENSMGAG00000002313	1.19394	0.0318	LOC100539008	glutamine synthetase	19	protein_coding
Up	ENSMGAG00000000717	1.18145	0.0263	SDC3	syndecan 3 [Source:NCBI gene (formerly Entrezgene);Acc:100303706]	25	protein_coding
Up	ENSMGAG00000016954	1.17787	0.0208	ENSMGAG00000016954	Protein kinase domain-containing protein	28	protein_coding
Up	ENSMGAG00000023022	1.17778	0.0374	LRRC75A	leucine rich repeat containing 75A [Source:NCBI gene;Acc:417550] ortholog	21	protein_coding
Up	ENSMGAG00000002693	1.17473	0.0318	PROCR	protein C receptor	11	protein_coding
Up	ENSMGAG00000018427	1.16387	0.0415	SLC17A9	solute carrier family 17 member 9 [Source:NCBI gene;Acc:419236] ortholog	22	protein_coding
Up	ENSMGAG00000018542	1.15921	0.0329	LOC104912118	probable E3 ubiquitin-protein ligase MID2 [ Meleagris gallopavo (turkey) ]	9	protein_coding
Up	ENSMGAG00000000799	1.14935	0.00764	SERINC2	serine incorporator 2 [Source:HGNC Symbol;Acc:HGNC:23231]	25	protein_coding
Up	ENSMGAG00000018640	1.13471	0.0374	FAM110C	family with sequence similarity 110 member C [Source:HGNC Symbol;Acc:HGNC:33340]	2	protein_coding
Up	ENSMGAG00000015595	1.13358	0.0179	MYADM	myeloid associated differentiation marker	16	protein_coding
Up	ENSMGAG00000010366	1.12934	0.000137	HPDL	4-hydroxyphenylpyruvate dioxygenase like	10	protein_coding
Up	ENSMGAG00000013112	1.1253	0.0215	ENSMGAG00000013112	PID domain-containing protein	30	protein_coding
Up	ENSMGAG00000001464	1.11584	0.0192	colgalt2	collagen beta(1-O)galactosyltransferase 2	10	protein_coding
Up	ENSMGAG00000020832	1.11491	0.0194	ENDOD1	endonuclease domain containing 1 [Source:HGNC Symbol;Acc:HGNC:29129]	1	protein_coding
Up	ENSMGAG00000018187	1.10987	0.0466	LOC104915397	histone H1.11R [ Meleagris gallopavo (turkey) ]	ADDD02065506.1	protein_coding
Up	ENSMGAG00000011894	1.10797	0.000807	ZFP36L1	ZFP36 ring finger protein like 1 [Source:HGNC Symbol;Acc:HGNC:1107]	5	protein_coding
Up	ENSMGAG00000022335	1.1018	0.0456	GNAO1	G protein subunit alpha o1 [Source:NCBI gene;Acc:415698] ortholog	13	protein_coding
Up	ENSMGAG00000010516	1.10091	0.0215	CALHM2	calcium homeostasis modulator family member 2 [Source:HGNC Symbol;Acc:HGNC:23493]	8	protein_coding
Up	ENSMGAG00000007421	1.09355	0.0143	AGPAT2	1-acylglycerol-3-phosphate O-acyltransferase 2 [Source:HGNC Symbol;Acc:HGNC:325]	19	protein_coding
Up	ENSMGAG00000005025	1.0868	0.00918	NOS1AP	nitric oxide synthase 1 adaptor protein	10	protein_coding
Up	ENSMGAG00000000949	1.08475	0.0177	HIC2	HIC ZBTB transcriptional repressor 2	17	protein_coding
Up	ENSMGAG00000016914	1.08353	0.00817	CTSK	cathepsin K [Source:HGNC Symbol;Acc:HGNC:2536]	27	protein_coding
Up	ENSMGAG00000009083	1.06848	0.0382	ITPRID2	ITPR interacting domain containing 2 [Source:HGNC Symbol;Acc:HGNC:11319]	7	protein_coding
Up	ENSMGAG00000015557	1.06055	0.0287	TRIM7	tripartite motif containing 7	18	protein_coding
Up	ENSMGAG00000017622	1.05949	0.000213	NECTIN4	nectin cell adhesion molecule 4 [Source:HGNC Symbol;Acc:HGNC:19688]	KN388156.1	protein_coding
Up	ENSMGAG00000006588	1.05238	0.0195	LRRN4	leucine rich repeat neuronal 4	2	protein_coding
Up	ENSMGAG00000014823	1.04697	0.0387	ECRG4	ECRG4 augurin precursor [Source:HGNC Symbol;Acc:HGNC:24642]	1	protein_coding
Up	ENSMGAG00000004601	1.03785	0.0466	CALCRL	calcitonin receptor like receptor [Source:HGNC Symbol;Acc:HGNC:16709]	7	protein_coding
Up	ENSMGAG00000001477	1.03736	0.000835	ASAP3	ArfGAP with SH3 domain, ankyrin repeat and PH domain 3	25	protein_coding
Up	ENSMGAG00000010484	1.02609	0.00105	SEMA4B	semaphorin 4B [Source:HGNC Symbol;Acc:HGNC:10730]	12	protein_coding
Up	ENSMGAG00000001625	1.01976	0.0287	ACSBG2	acyl-CoA synthetase bubblegum family member 2	30	protein_coding
Up	ENSMGAG00000006856	0.993217	0.0237	PDGFRB	platelet derived growth factor receptor beta	15	protein_coding
Up	ENSMGAG00000019241	0.985536	0.00372	ENSMGAG00000019241	novel protein coding gene	ADDD02252408.1	protein_coding
Up	ENSMGAG00000020346	0.978918	0.033	PHETA1	PH domain containing endocytic trafficking adaptor 1 [Source:HGNC Symbol;Acc:HGNC:26509]	17	protein_coding
Up	ENSMGAG00000004132	0.967308	0.00521	ITM2C	integral membrane protein 2C	11	protein_coding
Up	ENSMGAG00000019435	0.966834	0.0247	ENSMGAG00000019435	GTPase, IMAP family member 6 [Source:NCBI gene;Acc:420413] ortholog	6	protein_coding
Up	ENSMGAG00000011680	0.95944	0.000804	KANK4	KN motif and ankyrin repeat domains 4 [Source:HGNC Symbol;Acc:HGNC:27263]	10	protein_coding
Up	ENSMGAG00000009147	0.957628	0.00666	EPHB3	EPH receptor B3	11	protein_coding
Up	ENSMGAG00000007845	0.957408	6.76e-05	LOC100544408	cytochrome b-245 light chain	13	protein_coding
Up	ENSMGAG00000014830	0.957101	0.0215	LIMS1	LIM zinc finger domain containing 1	1	protein_coding
Up	ENSMGAG00000020142	0.956629	0.0399	INAVA	innate immunity activator [ Meleagris gallopavo (turkey) ]	KN387089.1	protein_coding
Up	ENSMGAG00000014119	0.956588	0.0456	SCARA5	scavenger receptor class A member 5 [Source:HGNC Symbol;Acc:HGNC:28701]	2	protein_coding
Up	ENSMGAG00000003932	0.953252	0.00185	PARP3	poly(ADP-ribose) polymerase family member 3 [Source:HGNC Symbol;Acc:HGNC:273]	14	protein_coding
Up	ENSMGAG00000010133	0.952263	0.0141	PAQR5	progestin and adipoQ receptor family member 5 [Source:HGNC Symbol;Acc:HGNC:29645]	12	protein_coding
Up	ENSMGAG00000003911	0.945324	0.0466	PTTG1IP	pituitary tumor-transforming 1 interacting protein	11	protein_coding
Up	ENSMGAG00000002851	0.929521	0.0298	IGFBP4	Insulin like growth factor binding protein 4	29	protein_coding
Up	ENSMGAG00000012977	0.928367	0.00896	ENSMGAG00000012977	Uncharacterized protein	ADDD02096679.1	protein_coding
Up	ENSMGAG00000007566	0.927247	0.0278	HES4	hes family bHLH transcription factor 4	23	protein_coding
Up	ENSMGAG00000002661	0.92266	0.033	LOC104912152	protein FAM162B-like	9	protein_coding
Up	ENSMGAG00000004921	0.909021	0.0298	VGLL4	vestigial like family member 4 [Source:HGNC Symbol;Acc:HGNC:28966]	14	protein_coding
Up	ENSMGAG00000022300	0.905536	0.014	FAM43A	family with sequence similarity 43 member A [Source:NCBI gene;Acc:429145] ortholog	11	protein_coding
Up	ENSMGAG00000013068	0.898656	0.0168	NRBP2	Nuclear receptor binding protein 2	KN386425.1	protein_coding
Up	ENSMGAG00000019739	0.895377	0.00597	OCLN	occludin [Source:NCBI gene;Acc:396026] ortholog	KN386498.1	protein_coding
Up	ENSMGAG00000004343	0.892039	0.0108	COL16A1	collagen type XVI alpha 1 chain	25	protein_coding
Up	ENSMGAG00000006629	0.889787	0.0247	LOC100540503	zinc transporter ZIP11-like	20	protein_coding
Up	ENSMGAG00000003647	0.878157	0.0242	GRIN3B	Glutamate receptor	30	protein_coding
Up	ENSMGAG00000006939	0.857657	0.00533	ENSMGAG00000006939	pseudogene	ADDD02078708.1	pseudogene
Up	ENSMGAG00000008325	0.855992	0.000804	SLC12A9	solute carrier family 12 member 9	11	protein_coding
Up	ENSMGAG00000022146	0.854101	0.0164	ENSMGAG00000022146	lncRNA	13	lncRNA
Up	ENSMGAG00000021751	0.850877	0.018	LOC104916404	immediate early response gene 5-like protein [ Meleagris gallopavo (turkey) ]	ADDD02094885.1	protein_coding
Up	ENSMGAG00000005828	0.84823	0.0179	TMEM51	transmembrane protein 51 [Source:HGNC Symbol;Acc:HGNC:25488]	23	protein_coding
Up	ENSMGAG00000019113	0.842713	0.0317	ENSMGAG00000019113	novel protein coding gene	11	protein_coding
Up	ENSMGAG00000007461	0.842498	0.00766	NOTCH1	notch receptor 1 [Source:HGNC Symbol;Acc:HGNC:7881]	19	protein_coding
Up	ENSMGAG00000010198	0.834649	0.00965	PTCH2	patched 2 [Source:HGNC Symbol;Acc:HGNC:9586]	10	protein_coding
Up	ENSMGAG00000000716	0.826137	0.0208	ARHGEF10L	Rho guanine nucleotide exchange factor 10 like [Source:HGNC Symbol;Acc:HGNC:25540]	23	protein_coding
Up	ENSMGAG00000013885	0.824331	0.0465	CCND2	cyclin D2	1	protein_coding
Up	ENSMGAG00000002711	0.82201	0.0306	PAFAH2	platelet activating factor acetylhydrolase 2	25	protein_coding
Up	ENSMGAG00000004273	0.821437	0.0309	ADAMTSL5	ADAMTS like 5	30	protein_coding
Up	ENSMGAG00000001336	0.820516	0.0168	ENSMGAG00000001336	pseudogene	23	pseudogene
Up	ENSMGAG00000018838	0.820099	0.00762	BCAR1	BCAR1, Cas family scaffolding protein [Source:NCBI gene;Acc:415691] ortholog	13	protein_coding
Up	ENSMGAG00000018766	0.816869	0.0383	MAPKAPK3	mitogen-activated protein kinase-activated protein kinase 3 [Source:NCBI gene;Acc:415917] ortholog	14	protein_coding
Up	ENSMGAG00000002650	0.811971	0.00659	PLEKHA6	pleckstrin homology domain containing A6 [Source:HGNC Symbol;Acc:HGNC:17053]	28	protein_coding
Up	ENSMGAG00000022032	0.799745	0.00635	PHLDB1	pleckstrin homology like domain family B member 1 [Source:NCBI gene;Acc:419790] ortholog	26	protein_coding
Up	ENSMGAG00000003998	0.786575	0.00659	DNM1	dynamin 1 [Source:HGNC Symbol;Acc:HGNC:2972]	19	protein_coding
Up	ENSMGAG00000001543	0.785249	0.00105	NAV1	neuron navigator 1	28	protein_coding
Up	ENSMGAG00000011990	0.784944	0.0247	GADD45A	growth arrest and DNA damage inducible alpha	10	protein_coding
Up	ENSMGAG00000007351	0.781921	0.0272	OLFM1	olfactomedin 1 [Source:HGNC Symbol;Acc:HGNC:17187]	19	protein_coding
Up	ENSMGAG00000004433	0.78078	0.0374	TMEM161A	transmembrane protein 161A [Source:HGNC Symbol;Acc:HGNC:26020]	30	protein_coding
Up	ENSMGAG00000002399	0.772659	0.0139	EPHB1	EPH receptor B1	11	protein_coding
Up	ENSMGAG00000005071	0.772039	0.0263	ATP13A2	ATPase cation transporting 13A2	23	protein_coding
Up	ENSMGAG00000011343	0.768809	0.0223	LDLRAD1	low density lipoprotein receptor class A domain containing 1	10	protein_coding
Up	ENSMGAG00000002372	0.767071	0.00531	NECTIN1	nectin cell adhesion molecule 1 [Source:HGNC Symbol;Acc:HGNC:9706]	26	protein_coding
Up	ENSMGAG00000019756	0.764796	0.0276	LIX1L	limb and CNS expressed 1 like [Source:HGNC Symbol;Acc:HGNC:28715] ortholog	KN388956.1	protein_coding
Up	ENSMGAG00000009416	0.761847	0.00169	VASN	vasorin [Source:HGNC Symbol;Acc:HGNC:18517]	16	protein_coding
Up	ENSMGAG00000003411	0.757194	0.0374	SH3TC2	SH3 domain and tetratricopeptide repeats 2	15	pseudogene
Up	ENSMGAG00000006220	0.756534	0.0259	ZDHHC4	Palmitoyltransferase (EC 2.3.1.225)	16	protein_coding
Up	ENSMGAG00000009429	0.756393	0.00067	PCSK6	proprotein convertase subtilisin/kexin type 6 [Source:HGNC Symbol;Acc:HGNC:8569]	12	protein_coding
Up	ENSMGAG00000020692	0.756126	0.033	ENSMGAG00000020692	novel protein coding gene	24	protein_coding
Up	ENSMGAG00000001315	0.751095	0.0374	TNFRSF25	TNF receptor superfamily member 25 [Source:HGNC Symbol;Acc:HGNC:11910]	23	protein_coding
Up	ENSMGAG00000004609	0.749284	0.0415	TRIM47	tripartite motif containing 47	20	protein_coding
Up	ENSMGAG00000009718	0.73584	0.0448	C10H1orf210	chromosome 10 C1orf210 homolog	10	protein_coding
Up	ENSMGAG00000001647	0.733005	0.0212	AEBP1	AE binding protein 1	KN386979.1	pseudogene
Up	ENSMGAG00000013502	0.72827	0.0232	ZBTB25	zinc finger and BTB domain containing 25 [Source:HGNC Symbol;Acc:HGNC:13112]	5	protein_coding
Up	ENSMGAG00000014011	0.724765	0.00206	ODC1	ornithine decarboxylase 1	2	protein_coding
Up	ENSMGAG00000022140	0.72436	0.0148	ENSMGAG00000022140	novel protein coding gene	5	protein_coding
Up	ENSMGAG00000009081	0.724125	0.0037	PRICKLE2	prickle planar cell polarity protein 2 [Source:HGNC Symbol;Acc:HGNC:20340]	14	protein_coding
Up	ENSMGAG00000019582	0.718151	0.0206	ENSMGAG00000019582	pseudogene	KN387946.1	pseudogene
Up	ENSMGAG00000007056	0.714935	0.0214	TRIM14	tripartite motif containing 14	Z	protein_coding
Up	ENSMGAG00000002529	0.71202	0.0136	IFITM5	interferon induced transmembrane protein 5 [Source:HGNC Symbol;Acc:HGNC:16644]	5	protein_coding
Up	ENSMGAG00000002450	0.711768	0.0436	CAPG	capping actin protein, gelsolin like	ADDD02280049.1	protein_coding
Up	ENSMGAG00000009150	0.711381	0.0374	ADAMTS9	ADAM metallopeptidase with thrombospondin type 1 motif 9 [Source:HGNC Symbol;Acc:HGNC:13202]	14	protein_coding
Up	ENSMGAG00000004222	0.710543	0.0207	TINAGL1	Tubulointerstitial nephritis antigen like 1	25	protein_coding
Up	ENSMGAG00000007832	0.705432	0.0394	MVD	mevalonate diphosphate decarboxylase	13	protein_coding
Up	ENSMGAG00000011071	0.700858	0.0374	LOC100545322	keratin, type II cytoskeletal cochleal	4	protein_coding
Up	ENSMGAG00000003204	0.697322	0.0177	B3GALT6	Hexosyltransferase (EC 2.4.1.-)	23	protein_coding
Up	ENSMGAG00000017868	0.692845	0.0175	LOC100551205	dispanin subfamily A member 2b-like	5	protein_coding
Up	ENSMGAG00000007132	0.691754	0.0482	SLC49A3	solute carrier family 49 member 3 [Source:HGNC Symbol;Acc:HGNC:26177]	Z	protein_coding
Up	ENSMGAG00000016032	0.68696	0.0148	FZD2	Frizzled class receptor 2	6	protein_coding
Up	ENSMGAG00000002992	0.680569	0.00786	FAM129B	niban apoptosis regulator 2	19	protein_coding
Up	ENSMGAG00000021721	0.671738	0.00762	ENSMGAG00000021721	lncRNA	30	lncRNA
Up	ENSMGAG00000018617	0.669044	0.0394	EVA1B	eva-1 homolog B [Source:NCBI gene;Acc:101749609] ortholog	25	protein_coding
Up	ENSMGAG00000006819	0.668203	0.0414	RXRA	retinoid X receptor alpha [Source:HGNC Symbol;Acc:HGNC:10477]	19	protein_coding
Up	ENSMGAG00000010494	0.668186	0.000594	HDAC7	histone deacetylase 7	17	protein_coding
Up	ENSMGAG00000001905	0.656995	0.0206	PAK4	p21 (RAC1) activated kinase 4	KN387764.1	protein_coding
Up	ENSMGAG00000009522	0.653803	0.00152	CASKIN2	CASK interacting protein 2 [Source:HGNC Symbol;Acc:HGNC:18200]	20	protein_coding
Up	ENSMGAG00000020417	0.647223	0.0235	ENSMGAG00000020417	dehydrogenase/reductase 13 [Source:NCBI gene;Acc:100858939] ortholog	21	protein_coding
Up	ENSMGAG00000006027	0.646934	0.0108	TBC1D16	TBC1 domain family member 16	20	protein_coding
Up	ENSMGAG00000001009	0.638142	0.000903	SMARCD2	SWI/SNF related, matrix associated, actin dependent regulator of chromatin, subfamily d, member 2	29	protein_coding
Up	ENSMGAG00000010357	0.637547	0.00105	MYO18A	myosin XVIIIA	21	protein_coding
Up	ENSMGAG00000005138	0.632461	0.0142	FAM83G	family with sequence similarity 83 member G [Source:HGNC Symbol;Acc:HGNC:32554]	16	protein_coding
Up	ENSMGAG00000006451	0.630777	0.00372	ABR	ABR activator of RhoGEF and GTPase	21	protein_coding
Up	ENSMGAG00000009720	0.626624	0.0265	TIE1	tyrosine kinase with immunoglobulin like and EGF like domains 1 [Source:HGNC Symbol;Acc:HGNC:11809]	10	protein_coding
Up	ENSMGAG00000017537	0.626136	0.0287	ISLR	immunoglobulin superfamily containing leucine rich repeat [Source:HGNC Symbol;Acc:HGNC:6133]	12	protein_coding
Up	ENSMGAG00000003883	0.618407	0.00169	PTK7	protein tyrosine kinase 7 (inactive) [Source:HGNC Symbol;Acc:HGNC:9618]	2	protein_coding
Up	ENSMGAG00000019618	0.615575	0.0037	ENSMGAG00000019618	novel protein coding gene	29	protein_coding
Up	ENSMGAG00000022558	0.603663	0.0235	SIGMAR1	sigma non-opioid intracellular receptor 1 [Source:HGNC Symbol;Acc:HGNC:8157]	Z	protein_coding
Up	ENSMGAG00000019827	0.601555	0.0252	ENSMGAG00000019827	novel protein coding gene	19	protein_coding
Up	ENSMGAG00000020061	0.599934	0.0384	ENSMGAG00000020061	novel protein coding gene	KN389160.1	protein_coding
Up	ENSMGAG00000002121	0.598266	0.0281	LOC100551074	discoidin domain-containing receptor 2-like	19	protein_coding
Up	ENSMGAG00000017830	0.597	0.0179	LOC100546146	uncharacterized LOC100546146	7	protein_coding
Up	ENSMGAG00000002332	0.595583	0.012	ARRDC1	arrestin domain containing 1 [Source:HGNC Symbol;Acc:HGNC:28633]	19	protein_coding
Up	ENSMGAG00000001424	0.594327	0.014	HYAL2	hyaluronoglucosaminidase 2	14	protein_coding
Up	ENSMGAG00000019875	0.590412	0.0336	ENSMGAG00000019875	lncRNA	KN388108.1	lncRNA
Up	ENSMGAG00000011232	0.589476	0.0317	TMEM198	transmembrane protein 198 [Source:HGNC Symbol;Acc:HGNC:33704]	7	protein_coding
Up	ENSMGAG00000007048	0.587694	0.035	SLC2A1	solute carrier family 2 member 1	23	protein_coding
Down	ENSMGAG00000009866	-6.48482	6.27e-07	KCNH1	potassium voltage-gated channel subfamily H member 1	2	protein_coding
Down	ENSMGAG00000006756	-5.98373	5.71e-05	OLFM3	olfactomedin 3	10	protein_coding
Down	ENSMGAG00000012440	-5.85247	7.3e-07	SLC34A2	solute carrier family 34 member 2 [Source:HGNC Symbol;Acc:HGNC:11020]	4	protein_coding
Down	ENSMGAG00000014223	-4.65019	0.0329	LOC100545362	uncharacterized LOC100545362	2	protein_coding
Down	ENSMGAG00000012283	-4.40451	0.0161	ESYT3	extended synaptotagmin 3 [Source:HGNC Symbol;Acc:HGNC:24295]	7	protein_coding
Down	ENSMGAG00000008956	-4.35915	0.00324	ENSMGAG00000008956	pseudogene	16	pseudogene
Down	ENSMGAG00000021246	-4.32038	0.0392	ENSMGAG00000021246	lncRNA	26	lncRNA
Down	ENSMGAG00000013187	-4.14369	0.0233	SAMD3	sterile alpha motif domain containing 3	2	protein_coding
Down	ENSMGAG00000010671	-4.06639	0.0276	ENSMGAG00000010671	Uncharacterized protein	5	protein_coding
Down	ENSMGAG00000020699	-3.88728	0.00766	LOC104911914	rho-related BTB domain-containing protein 1-like	8	protein_coding
Down	ENSMGAG00000002370	-3.85268	2.88e-05	SPOCK3	SPARC (osteonectin), cwcv and kazal like domains proteoglycan 3 [Source:HGNC Symbol;Acc:HGNC:13565]	4	protein_coding
Down	ENSMGAG00000015329	-3.76998	0.0134	CH25H	cholesterol 25-hydroxylase [Source:HGNC Symbol;Acc:HGNC:1907]	8	protein_coding
Down	ENSMGAG00000008698	-3.74758	0.0122	ACSL6	acyl-CoA synthetase long chain family member 6	15	protein_coding
Down	ENSMGAG00000021088	-3.68981	0.00722	ENSMGAG00000021088	lncRNA	21	lncRNA
Down	ENSMGAG00000013616	-3.5279	0.000835	LOC100540824	solute carrier organic anion transporter family member 1C1-like	1	protein_coding
Down	ENSMGAG00000009227	-3.51359	0.0486	SLC14A2	solute carrier family 14 member 2	Z	protein_coding
Down	ENSMGAG00000008978	-3.42433	0.00101	CYP26A1	cytochrome P450 family 26 subfamily A member 1 [Source:HGNC Symbol;Acc:HGNC:2603]	8	protein_coding
Down	ENSMGAG00000013950	-3.41381	0.04	MYOM2	myomesin 2	2	protein_coding
Down	ENSMGAG00000015635	-3.369	0.00023	CHST4	carbohydrate sulfotransferase 4	13	protein_coding
Down	ENSMGAG00000013618	-3.33362	0.000807	SLCO1A2	solute carrier organic anion transporter family member 1A2	1	protein_coding
Down	ENSMGAG00000012580	-3.3153	1.13e-06	HAS2	hyaluronan synthase 2 [Source:HGNC Symbol;Acc:HGNC:4819]	3	protein_coding
Down	ENSMGAG00000013157	-3.29676	0.0415	AKR1D1	aldo-keto reductase family 1 member D1	1	protein_coding
Down	ENSMGAG00000019864	-3.26799	0.0468	ENSMGAG00000019864	novel protein coding gene	1	protein_coding
Down	ENSMGAG00000009979	-3.16944	1.05e-06	LOC100544288	von Willebrand factor D and EGF domain-containing protein-like	6	protein_coding
Down	ENSMGAG00000012711	-3.15889	0.0143	LYPD6B	LY6/PLAUR domain containing 6B [Source:HGNC Symbol;Acc:HGNC:27018]	7	protein_coding
Down	ENSMGAG00000002767	-3.14221	0.0306	PTH1R	parathyroid hormone 1 receptor [Source:HGNC Symbol;Acc:HGNC:9608]	6	protein_coding
Down	ENSMGAG00000002633	-3.04541	3.16e-06	ABCG4	ATP binding cassette subfamily G member 4 [Source:HGNC Symbol;Acc:HGNC:13884]	26	protein_coding
Down	ENSMGAG00000010272	-3.03622	0.027	LRRC31	leucine rich repeat containing 31 [Source:HGNC Symbol;Acc:HGNC:26261]	11	protein_coding
Down	ENSMGAG00000003403	-2.98008	0.014	ENSMGAG00000003403	LAM_G_DOMAIN domain-containing protein	19	protein_coding
Down	ENSMGAG00000006845	-2.97063	0.0276	TNFRSF6B	TNF receptor superfamily member 6b	22	protein_coding
Down	ENSMGAG00000004727	-2.90544	0.0318	FREM1	FRAS1 related extracellular matrix 1 [Source:HGNC Symbol;Acc:HGNC:23399]	Z	protein_coding
Down	ENSMGAG00000013129	-2.82046	0.0105	ATP6V0A4	ATPase H+ transporting V0 subunit a4	1	protein_coding
Down	ENSMGAG00000020676	-2.77598	0.0461	LOC104911043	ATP-binding cassette sub-family C member 8-like	5	protein_coding
Down	ENSMGAG00000003872	-2.66945	0.0127	GZMA	granzyme A [Source:HGNC Symbol;Acc:HGNC:4708]	Z	protein_coding
Down	ENSMGAG00000022556	-2.61568	0.000807	ENSMGAG00000022556	collagen type XXVII alpha 1 chain [Source:NCBI gene;Acc:417231] ortholog	19	protein_coding
Down	ENSMGAG00000017173	-2.6058	0.0325	ENSMGAG00000017173	Uncharacterized protein	29	protein_coding
Down	ENSMGAG00000006997	-2.59581	0.018	APOD	apolipoprotein D	11	protein_coding
Down	ENSMGAG00000018664	-2.57612	0.00659	ENSMGAG00000018664	lncRNA	9	lncRNA
Down	ENSMGAG00000014533	-2.55462	0.0148	RCAN1	regulator of calcineurin 1	1	protein_coding
Down	ENSMGAG00000008797	-2.54613	2.92e-05	FAM64A	PICALM interacting mitotic regulator	21	protein_coding
Down	ENSMGAG00000002880	-2.50856	0.0148	CCR7	C-C motif chemokine receptor 7	29	protein_coding
Down	ENSMGAG00000021665	-2.50499	0.00895	ENSMGAG00000021665	lncRNA	2	lncRNA
Down	ENSMGAG00000001951	-2.4835	0.0317	CRTAM	cytotoxic and regulatory T cell molecule [Source:HGNC Symbol;Acc:HGNC:24313]	26	protein_coding
Down	ENSMGAG00000015042	-2.4459	1.05e-06	LOC100540211	phosphatidylinositol 3,4,5-trisphosphate 3-phosphatase TPTE2-like	1	protein_coding
Down	ENSMGAG00000022845	-2.43355	0.0365	ENSMGAG00000022845	novel protein coding gene	ADDD02184479.1	protein_coding
Down	ENSMGAG00000010281	-2.42175	0.0168	LRRC34	leucine rich repeat containing 34 [Source:HGNC Symbol;Acc:HGNC:28408]	11	protein_coding
Down	ENSMGAG00000012713	-2.39079	0.0104	LYPD6	LY6/PLAUR domain containing 6	7	protein_coding
Down	ENSMGAG00000011094	-2.37552	0.00404	BMPR1B	bone morphogenetic protein receptor type 1B [Source:HGNC Symbol;Acc:HGNC:1077]	4	protein_coding
Down	ENSMGAG00000014897	-2.37374	0.049	SLC15A1	solute carrier family 15 member 1 [Source:NCBI gene (formerly Entrezgene);Acc:100303666]	1	protein_coding
Down	ENSMGAG00000017044	-2.32867	0.00293	EMB	embigin [Source:HGNC Symbol;Acc:HGNC:30465]	Z	protein_coding
Down	ENSMGAG00000004005	-2.2872	0.0466	PFKFB3	6-phosphofructo-2-kinase/fructose-2,6-biphosphatase 3	1	protein_coding
Down	ENSMGAG00000019224	-2.2776	0.0252	NR5A2	nuclear receptor subfamily 5 group A member 2 [Source:NCBI gene;Acc:395961] ortholog	10	protein_coding
Down	ENSMGAG00000007980	-2.27727	0.000112	RNF128	ring finger protein 128, E3 ubiquitin protein ligase	9	protein_coding
Down	ENSMGAG00000010608	-2.25426	0.0406	GAREM1	GRB2 associated regulator of MAPK1 subtype 1	3	protein_coding
Down	ENSMGAG00000012505	-2.24831	0.0284	NFKBIA	NFKB inhibitor alpha	5	protein_coding
Down	ENSMGAG00000006265	-2.24244	0.00304	SLC5A11	solute carrier family 5 member 11	16	protein_coding
Down	ENSMGAG00000011737	-2.22542	0.00633	MYRIP	myosin VIIA and Rab interacting protein [Source:HGNC Symbol;Acc:HGNC:19156]	6	protein_coding
Down	ENSMGAG00000003791	-2.1158	0.0352	FGF13	fibroblast growth factor 13 [Source:HGNC Symbol;Acc:HGNC:3670]	9	protein_coding
Down	ENSMGAG00000015153	-2.10411	0.0171	SLC35F2	solute carrier family 35 member F2	1	protein_coding
Down	ENSMGAG00000006732	-2.04882	0.000674	MELTF	melanotransferrin	11	protein_coding
Down	ENSMGAG00000002485	-2.04476	0.0141	LOC100543893	TOX high mobility group box family member 2-like	22	protein_coding
Down	ENSMGAG00000021079	-2.03708	0.000382	LOC104909729	vacuolar protein 8-like	2	protein_coding
Down	ENSMGAG00000004516	-1.96752	0.00597	GATA3	GATA binding protein 3 [Source:HGNC Symbol;Acc:HGNC:4172]	1	protein_coding
Down	ENSMGAG00000007902	-1.95619	0.0466	MOV10L1	Mov10 like RISC complex RNA helicase 1 [Source:HGNC Symbol;Acc:HGNC:7201]	1	protein_coding
Down	ENSMGAG00000014810	-1.93428	0.00786	IL1RL1	interleukin 1 receptor like 1 [Source:HGNC Symbol;Acc:HGNC:5998]	1	protein_coding
Down	ENSMGAG00000015044	-1.91116	7.3e-07	COG6	component of oligomeric golgi complex 6 [Source:HGNC Symbol;Acc:HGNC:18621]	1	protein_coding
Down	ENSMGAG00000005639	-1.91089	0.0192	SUSD3	sushi domain containing 3 [Source:HGNC Symbol;Acc:HGNC:28391]	14	protein_coding
Down	ENSMGAG00000007117	-1.90844	0.0253	KLHL36	kelch like family member 36 [Source:HGNC Symbol;Acc:HGNC:17844]	13	protein_coding
Down	ENSMGAG00000006006	-1.90745	0.00906	ENGASE	Mannosyl-glycoprotein endo-beta-N-acetylglucosaminidase (EC 3.2.1.96)	20	protein_coding
Down	ENSMGAG00000009265	-1.88372	0.00666	NRCAM	neuronal cell adhesion molecule [Source:HGNC Symbol;Acc:HGNC:7994]	1	protein_coding
Down	ENSMGAG00000022507	-1.86303	0.0263	NUAK2	NUAK family kinase 2	28	protein_coding
Down	ENSMGAG00000005733	-1.79226	0.0223	PIP5K1B	phosphatidylinositol-4-phosphate 5-kinase type 1 beta	Z	protein_coding
Down	ENSMGAG00000002682	-1.79068	0.000203	HINFP	histone H4 transcription factor [Source:HGNC Symbol;Acc:HGNC:17850]	26	protein_coding
Down	ENSMGAG00000003225	-1.74557	0.0402	RAMP1	receptor activity modifying protein 1 [Source:HGNC Symbol;Acc:HGNC:9843]	7	protein_coding
Down	ENSMGAG00000006225	-1.71775	0.0415	PLAU	plasminogen activator, urokinase	8	protein_coding
Down	ENSMGAG00000003913	-1.64758	0.00666	PLA2G15	phospholipase A2 group XV	13	protein_coding
Down	ENSMGAG00000021975	-1.63314	0.00766	LOC100539092	prostatic acid phosphatase-like [ Meleagris gallopavo (turkey) ]	6	protein_coding
Down	ENSMGAG00000019275	-1.62768	0.0466	LOC104912571	dedicator of cytokinesis protein 10-like	11	protein_coding
Down	ENSMGAG00000002925	-1.5986	0.035	MAML3	mastermind like transcriptional coactivator 3 [Source:HGNC Symbol;Acc:HGNC:16272]	4	protein_coding
Down	ENSMGAG00000016678	-1.57992	0.0262	IL6	interleukin 6	6	protein_coding
Down	ENSMGAG00000021084	-1.57692	0.0202	LOC100546141	protein phosphatase 1K, mitochondrial [ Meleagris gallopavo (turkey) ]	4	protein_coding
Down	ENSMGAG00000008373	-1.56965	0.0406	LOC104910606	protein phosphatase 1K, mitochondrial-like	4	protein_coding
Down	ENSMGAG00000019061	-1.53817	0.0212	CEP78	centrosomal protein 78 [Source:HGNC Symbol;Acc:HGNC:25740]	Z	protein_coding
Down	ENSMGAG00000013312	-1.5365	0.035	SLC25A47	solute carrier family 25 member 47 [Source:HGNC Symbol;Acc:HGNC:20115]	5	protein_coding
Down	ENSMGAG00000017632	-1.53528	0.0235	ENSMGAG00000017632	lncRNA	11	lncRNA
Down	ENSMGAG00000008568	-1.5272	0.00417	SGSM2	small G protein signaling modulator 2 [Source:HGNC Symbol;Acc:HGNC:29026]	21	protein_coding
Down	ENSMGAG00000000888	-1.5082	0.0272	SRSF6	serine and arginine rich splicing factor 6	22	protein_coding
Down	ENSMGAG00000007159	-1.50152	0.036	LOC104915200	metalloprotease TIKI1-like	Z	protein_coding
Down	ENSMGAG00000005307	-1.49968	0.0489	SHCBP1	SHC binding and spindle associated 1	13	protein_coding
Down	ENSMGAG00000013307	-1.4953	0.046	SLC25A29	solute carrier family 25 member 29 [Source:HGNC Symbol;Acc:HGNC:20116]	5	protein_coding
Down	ENSMGAG00000002185	-1.49327	0.00371	KCNG2	potassium voltage-gated channel modifier subfamily G member 2 [Source:HGNC Symbol;Acc:HGNC:6249]	3	protein_coding
Down	ENSMGAG00000005875	-1.47798	0.0145	COL9A3	collagen type IX alpha 3 chain	22	protein_coding
Down	ENSMGAG00000012221	-1.47363	0.0393	RASGRP1	RAS guanyl releasing protein 1	5	protein_coding
Down	ENSMGAG00000000779	-1.47245	0.00635	ENSMGAG00000000779	Uncharacterized protein	26	protein_coding
Down	ENSMGAG00000009895	-1.45456	0.0073	LOC100543828	adseverin-like	6	protein_coding
Down	ENSMGAG00000002439	-1.44475	0.0193	TMEM132D	transmembrane protein 132D	17	protein_coding
Down	ENSMGAG00000001400	-1.41176	7.3e-07	HEXB	Beta-N-acetylhexosaminidase (EC 3.2.1.52)	Z	protein_coding
Down	ENSMGAG00000006392	-1.41026	0.0126	LAMP5	lysosomal associated membrane protein family member 5	2	protein_coding
Down	ENSMGAG00000021919	-1.39579	0.00185	ENSMGAG00000021919	novel protein coding gene	4	protein_coding
Down	ENSMGAG00000007360	-1.38457	0.046	KIAA0513	KIAA0513 ortholog	13	protein_coding
Down	ENSMGAG00000001154	-1.37455	0.000246	ST14	ST14 transmembrane serine protease matriptase [Source:HGNC Symbol;Acc:HGNC:11344]	26	protein_coding
Down	ENSMGAG00000001145	-1.36149	0.0466	STARD8	StAR related lipid transfer domain containing 8	9	protein_coding
Down	ENSMGAG00000012694	-1.34925	0.048	KIF5C	kinesin family member 5C	7	protein_coding
Down	ENSMGAG00000009879	-1.34382	0.0393	SMAD3	SMAD family member 3 [Source:HGNC Symbol;Acc:HGNC:6769]	12	protein_coding
Down	ENSMGAG00000006882	-1.32932	0.00766	PLCG2	phospholipase C gamma 2 [Source:HGNC Symbol;Acc:HGNC:9066]	13	protein_coding
Down	ENSMGAG00000001885	-1.32775	0.0263	UBE2R2	ubiquitin conjugating enzyme E2 R2	Z	protein_coding
Down	ENSMGAG00000013855	-1.29731	0.0415	DUSP16	dual specificity phosphatase 16 [Source:HGNC Symbol;Acc:HGNC:17909]	1	protein_coding
Down	ENSMGAG00000004066	-1.29305	0.046	CA12	carbonic anhydrase 12	12	protein_coding
Down	ENSMGAG00000022680	-1.28447	0.0456	ENSMGAG00000022680	novel protein coding gene	13	protein_coding
Down	ENSMGAG00000004410	-1.27305	0.0263	RHOF	ras homolog family member F, filopodia associated [Source:HGNC Symbol;Acc:HGNC:15703]	17	protein_coding
Down	ENSMGAG00000012457	-1.26448	6.19e-05	PI4K2B	phosphatidylinositol 4-kinase type 2 beta [Source:HGNC Symbol;Acc:HGNC:18215]	4	protein_coding
Down	ENSMGAG00000014525	-1.24458	0.00102	DONSON	DNA replication fork stabilization factor DONSON [Source:HGNC Symbol;Acc:HGNC:2993]	1	protein_coding
Down	ENSMGAG00000003078	-1.24267	0.00666	TF	transferrin [Source:NCBI gene (formerly Entrezgene);Acc:100125333]	11	protein_coding
Down	ENSMGAG00000014389	-1.23182	0.00863	KIAA1524	KIAA1524 ortholog	1	protein_coding
Down	ENSMGAG00000000787	-1.22435	0.014	OSGIN1	oxidative stress induced growth inhibitor 1 [Source:HGNC Symbol;Acc:HGNC:30093]	13	protein_coding
Down	ENSMGAG00000010863	-1.20134	0.0218	FMNL1	Formin like 1	29	protein_coding
Down	ENSMGAG00000007193	-1.19063	0.000295	ENSMGAG00000007193	Ferritin	5	protein_coding
Down	ENSMGAG00000011039	-1.18983	0.00047	HPS3	HPS3 biogenesis of lysosomal organelles complex 2 subunit 1 [Source:HGNC Symbol;Acc:HGNC:15597]	11	protein_coding
Down	ENSMGAG00000010760	-1.15556	0.0329	TP53BP1	Tumor protein p53 binding protein 1	12	protein_coding
Down	ENSMGAG00000015914	-1.1483	1.93e-05	B3GNT2	UDP-GlcNAc:betaGal beta-1,3-N-acetylglucosaminyltransferase 2 [Source:HGNC Symbol;Acc:HGNC:15629]	2	protein_coding
Down	ENSMGAG00000009228	-1.13812	0.00306	MAGI1	membrane associated guanylate kinase, WW and PDZ domain containing 1 [Source:HGNC Symbol;Acc:HGNC:946]	14	protein_coding
Down	ENSMGAG00000000914	-1.13725	0.0295	ALPK3	Alpha kinase 3	12	protein_coding
Down	ENSMGAG00000011182	-1.13306	0.0305	CHP1	calcineurin like EF-hand protein 1	5	protein_coding
Down	ENSMGAG00000011882	-1.11673	0.0309	GSG1	germ cell associated 1 [Source:HGNC Symbol;Acc:HGNC:19716]	1	protein_coding
Down	ENSMGAG00000007529	-1.1009	0.0286	TXNRD3	thioredoxin reductase 3	14	protein_coding
Down	ENSMGAG00000021122	-1.09336	0.0144	PTAR1	protein prenyltransferase alpha subunit repeat containing 1 [Source:HGNC Symbol;Acc:HGNC:30449]	Z	protein_coding
Down	ENSMGAG00000006489	-1.08819	0.0249	ANKRD13A	ankyrin repeat domain 13A	17	protein_coding
Down	ENSMGAG00000002378	-1.08558	0.0286	SYT15	synaptotagmin 15	8	protein_coding
Down	ENSMGAG00000008349	-1.07647	0.0469	FAS	Fas cell surface death receptor [Source:HGNC Symbol;Acc:HGNC:11920]	8	protein_coding
Down	ENSMGAG00000006358	-1.06485	0.0287	TERB1	Telomere repeat binding bouquet formation protein 1	13	protein_coding
Down	ENSMGAG00000009732	-1.06085	0.0166	LOC100540668	sodium-coupled neutral amino acid transporter 2	1	protein_coding
Down	ENSMGAG00000003018	-1.05146	0.0428	PRLR	prolactin receptor [Source:NCBI gene (formerly Entrezgene);Acc:100126248]	Z	protein_coding
Down	ENSMGAG00000012563	-1.04677	0.00947	NCAPG	non-SMC condensin I complex subunit G [Source:HGNC Symbol;Acc:HGNC:24304]	4	protein_coding
Down	ENSMGAG00000008493	-1.03917	0.0143	MBTD1	mbt domain containing 1 [Source:HGNC Symbol;Acc:HGNC:19866]	20	protein_coding
Down	ENSMGAG00000004336	-1.03532	0.00846	SUCO	SUN domain containing ossification factor [Source:HGNC Symbol;Acc:HGNC:1240]	10	protein_coding
Down	ENSMGAG00000015269	-1.0266	0.0207	UVRAG	UV radiation resistance associated	1	protein_coding
Down	ENSMGAG00000014449	-1.01907	2.92e-05	POGLUT1	protein O-glucosyltransferase 1	1	protein_coding
Down	ENSMGAG00000018458	-1.01486	0.0436	ENSMGAG00000018458	lncRNA	3	lncRNA
Down	ENSMGAG00000005135	-1.01219	0.0194	LOC100546124	COBW domain-containing protein 2-like	Z	protein_coding
Down	ENSMGAG00000012815	-1.00657	0.0168	PRDM4	PR domain zinc finger protein 4 (PR domain-containing protein 4)	1	protein_coding
Down	ENSMGAG00000000862	-0.984586	0.0245	NECAB2	N-terminal EF-hand calcium binding protein 2	13	protein_coding
Down	ENSMGAG00000001454	-0.974009	0.046	TANC2	Tetratricopeptide repeat, ankyrin repeat and coiled-coil containing 2	29	protein_coding
Down	ENSMGAG00000008560	-0.968559	0.015	FANCI	FA complementation group I [Source:HGNC Symbol;Acc:HGNC:25568]	12	protein_coding
Down	ENSMGAG00000022059	-0.963791	0.000785	RNF146	ring finger protein 146	2	protein_coding
Down	ENSMGAG00000007985	-0.962478	0.019	TRABD	TraB domain containing [Source:HGNC Symbol;Acc:HGNC:28805]	1	protein_coding
Down	ENSMGAG00000015083	-0.946952	0.0276	LOC100546590	heat shock protein 105 kDa	1	protein_coding
Down	ENSMGAG00000007025	-0.940331	0.00183	ATP2C2	ATPase secretory pathway Ca2+ transporting 2 [Source:HGNC Symbol;Acc:HGNC:29103]	13	protein_coding
Down	ENSMGAG00000021808	-0.93643	0.00372	ENSMGAG00000021808	novel protein coding gene	7	protein_coding
Down	ENSMGAG00000004091	-0.924899	0.0286	OSER1	oxidative stress responsive serine rich 1	22	protein_coding
Down	ENSMGAG00000011719	-0.923718	0.0417	TRAK1	trafficking kinesin protein 1 [Source:HGNC Symbol;Acc:HGNC:29947]	6	protein_coding
Down	ENSMGAG00000002437	-0.90878	0.00635	GLUD1	glutamate dehydrogenase 1	8	protein_coding
Down	ENSMGAG00000004900	-0.902204	0.0215	FAM189A1	protein FAM189A1	12	protein_coding
Down	ENSMGAG00000012142	-0.901721	0.0317	C1orf198	Chromosome 1 open reading frame 198	2	protein_coding
Down	ENSMGAG00000005729	-0.895532	0.033	LOC100542236	rhophilin-2-like	13	protein_coding
Down	ENSMGAG00000001117	-0.878603	0.00372	CSGALNACT2	chondroitin sulfate N-acetylgalactosaminyltransferase 2 [Source:HGNC Symbol;Acc:HGNC:24292]	8	protein_coding
Down	ENSMGAG00000012944	-0.870966	0.0076	CEP128	centrosomal protein 128 [Source:HGNC Symbol;Acc:HGNC:20359]	5	protein_coding
Down	ENSMGAG00000013193	-0.864685	0.0393	RPIA	ribose 5-phosphate isomerase A	4	protein_coding
Down	ENSMGAG00000009192	-0.85264	0.0266	CHKA	choline kinase alpha	5	protein_coding
Down	ENSMGAG00000007992	-0.83839	6.81e-06	TBC1D8B	TBC1 domain family member 8B	9	protein_coding
Down	ENSMGAG00000013195	-0.833126	0.0448	SUCLG1	succinate-CoA ligase alpha subunit	4	protein_coding
Down	ENSMGAG00000012607	-0.82868	0.0236	C3H8orf76	chromosome 3 open reading frame, human C8orf76	3	protein_coding
Down	ENSMGAG00000011079	-0.82784	0.0211	TOX	thymocyte selection associated high mobility group box [Source:HGNC Symbol;Acc:HGNC:18988]	3	protein_coding
Down	ENSMGAG00000013059	-0.826199	0.00238	FGFR3	fibroblast growth factor receptor 3	4	protein_coding
Down	ENSMGAG00000009206	-0.804203	0.012	PPP1R3B	protein phosphatase 1 regulatory subunit 3B	4	protein_coding
Down	ENSMGAG00000008036	-0.803666	0.000707	HDAC10	histone deacetylase 10 [Source:HGNC Symbol;Acc:HGNC:18128]	1	protein_coding
Down	ENSMGAG00000001689	-0.801006	0.033	RANBP17	RAN binding protein 17	15	protein_coding
Down	ENSMGAG00000009988	-0.79921	0.033	LRRN1	leucine rich repeat neuronal 1 [Source:HGNC Symbol;Acc:HGNC:20980]	14	protein_coding
Down	ENSMGAG00000017584	-0.791832	0.003	MXD4	MAX dimerization protein 4 [Source:NCBI gene;Acc:422890] ortholog	4	protein_coding
Down	ENSMGAG00000013735	-0.781036	0.0423	ARNTL2	aryl hydrocarbon receptor nuclear translocator like 2 [Source:HGNC Symbol;Acc:HGNC:18984]	1	protein_coding
Down	ENSMGAG00000016047	-0.777906	0.0283	B3GNT5	UDP-GlcNAc:betaGal beta-1,3-N-acetylglucosaminyltransferase 5 [Source:HGNC Symbol;Acc:HGNC:15684]	11	protein_coding
Down	ENSMGAG00000017141	-0.775512	0.0262	ERCC8	ERCC excision repair 8, CSA ubiquitin ligase complex subunit [Source:HGNC Symbol;Acc:HGNC:3439]	Z	protein_coding
Down	ENSMGAG00000015139	-0.764121	0.0223	ARHGAP20	Rho GTPase activating protein 20	1	protein_coding
Down	ENSMGAG00000002500	-0.755539	0.0291	SPIN1	spindlin 1	Z	protein_coding
Down	ENSMGAG00000001872	-0.755045	0.0119	VRK2	VRK serine/threonine kinase 2	2	protein_coding
Down	ENSMGAG00000014029	-0.745037	0.0286	ENSMGAG00000014029	Uncharacterized protein	2	protein_coding
Down	ENSMGAG00000013022	-0.736724	0.00102	TTC8	tetratricopeptide repeat domain 8 [Source:HGNC Symbol;Acc:HGNC:20087]	5	protein_coding
Down	ENSMGAG00000017779	-0.732576	0.00533	LOC104910762	microtubule-associated tumor suppressor 1 homolog	4	protein_coding
Down	ENSMGAG00000017079	-0.731415	0.0142	PIK3R1	phosphoinositide-3-kinase regulatory subunit 1 [Source:HGNC Symbol;Acc:HGNC:8979]	Z	protein_coding
Down	ENSMGAG00000011756	-0.729907	0.0121	LOC100544294	dedicator of cytokinesis protein 1-like	8	protein_coding
Down	ENSMGAG00000001703	-0.727624	0.000935	FKBP15	FKBP prolyl isomerase family member 15 [Source:HGNC Symbol;Acc:HGNC:23397]	19	protein_coding
Down	ENSMGAG00000008936	-0.726024	0.0316	BET1	Bet1 golgi vesicular membrane trafficking protein	6	protein_coding
Down	ENSMGAG00000012599	-0.71983	0.0196	ATAD2	ATPase family AAA domain containing 2 [Source:HGNC Symbol;Acc:HGNC:30123]	3	protein_coding
Down	ENSMGAG00000011538	-0.719466	0.00227	MTUS1	microtubule associated tumor suppressor 1	4	protein_coding
Down	ENSMGAG00000000871	-0.71402	0.031	HSDL1	hydroxysteroid dehydrogenase like 1 [Source:HGNC Symbol;Acc:HGNC:16475]	13	protein_coding
Down	ENSMGAG00000005134	-0.703968	0.00677	MSH2	mutS homolog 2 [Source:HGNC Symbol;Acc:HGNC:7325]	2	protein_coding
Down	ENSMGAG00000006725	-0.70023	0.00943	CENPN	centromere protein N	13	protein_coding
Down	ENSMGAG00000019302	-0.694614	0.0485	LRRFIP1	LRR binding FLII interacting protein 1 [ Meleagris gallopavo (turkey) ]	7	protein_coding
Down	ENSMGAG00000015254	-0.669172	0.00214	INTS4	integrator complex subunit 4	1	protein_coding
Down	ENSMGAG00000019792	-0.663538	0.0236	ENSMGAG00000019792	lncRNA	3	lncRNA
Down	ENSMGAG00000010229	-0.655886	0.0216	TLK1	Tousled like kinase 1	7	protein_coding
Down	ENSMGAG00000008210	-0.651056	0.0317	TMEM161B	transmembrane protein 161B [Source:HGNC Symbol;Acc:HGNC:28483]	Z	protein_coding
Down	ENSMGAG00000021357	-0.637323	0.0279	RNLS	renalase, FAD dependent amine oxidase [Source:HGNC Symbol;Acc:HGNC:25641]	8	protein_coding
Down	ENSMGAG00000014814	-0.631601	0.035	MFSD9	major facilitator superfamily domain containing 9	1	protein_coding
Down	ENSMGAG00000013518	-0.631148	0.0464	QRSL1	glutaminyl-tRNA amidotransferase subunit QRSL1 [Source:HGNC Symbol;Acc:HGNC:21020]	2	protein_coding
Down	ENSMGAG00000015420	-0.630344	0.0272	BASP1	brain abundant membrane attached signal protein 1 [Source:HGNC Symbol;Acc:HGNC:957]	3	protein_coding
Down	ENSMGAG00000014901	-0.626598	0.00715	IPO5	importin 5 [Source:HGNC Symbol;Acc:HGNC:6402]	1	protein_coding
Down	ENSMGAG00000018872	-0.621341	0.046	ndufaf2	NADH:ubiquinone oxidoreductase complex assembly factor 2	Z	protein_coding
Down	ENSMGAG00000006852	-0.608066	0.046	RTEL1	regulator of telomere elongation helicase 1	22	protein_coding
Down	ENSMGAG00000012075	-0.606123	0.00244	HACD2	3-hydroxyacyl-CoA dehydratase 2	7	protein_coding
Down	ENSMGAG00000004524	-0.605814	0.014	TBC1D13	TBC1 domain family member 13 [Source:HGNC Symbol;Acc:HGNC:25571]	19	protein_coding
Down	ENSMGAG00000018498	-0.595933	0.0402	ENSMGAG00000018498	tubulin tyrosine ligase like 11 [Source:NCBI gene;Acc:417115] ortholog	19	protein_coding
Down	ENSMGAG00000011945	-0.589729	0.0393	MAP3K21	mitogen-activated protein kinase kinase kinase 21 [Source:HGNC Symbol;Acc:HGNC:29798]	2	protein_coding
Down	ENSMGAG00000014200	-0.586966	0.0171	MTMR9	myotubularin related protein 9	2	protein_coding

## Sheet: Semen_Late_Sham_Late
Regulation	Ensembl ID	log2 Fold Change	Adj.Pval	Gene ID	Gene description	Chr	Type
Up	ENSMGAG00000007424	4.25992	0.00342	PRKG2	protein kinase, cGMP-dependent, type II	4	protein_coding
Up	ENSMGAG00000019834	3.47766	0.0346	ENSMGAG00000019834	lncRNA	28	lncRNA
Up	ENSMGAG00000012328	3.47125	0.0229	TBXT	T-box transcription factor T [Source:HGNC Symbol;Acc:HGNC:11515]	2	protein_coding
Up	ENSMGAG00000009264	3.40338	0.0445	OTOP3	otopetrin 3 [Source:HGNC Symbol;Acc:HGNC:19658]	20	protein_coding
Up	ENSMGAG00000016147	3.3517	0.0162	KCNE1	potassium voltage-gated channel subfamily E regulatory subunit 1	1	protein_coding
Up	ENSMGAG00000018005	3.20181	0.0267	ENSMGAG00000018005	novel protein coding gene	25	protein_coding
Up	ENSMGAG00000014813	2.95975	0.0381	SLC9A4	solute carrier family 9 member A4 [Source:HGNC Symbol;Acc:HGNC:11077]	1	protein_coding
Up	ENSMGAG00000001332	2.81257	0.0375	DEPDC7	DEP domain containing 7 [Source:HGNC Symbol;Acc:HGNC:29899]	5	protein_coding
Up	ENSMGAG00000020589	2.75667	0.00962	ENSMGAG00000020589	novel protein coding gene	7	protein_coding
Up	ENSMGAG00000012782	2.71273	0.032	ENSMGAG00000012782	Uncharacterized protein	7	protein_coding
Up	ENSMGAG00000002859	2.65754	0.00936	LOC100540386	D-serine dehydratase-like	6	pseudogene
Up	ENSMGAG00000006232	2.64688	0.0459	GRID2IP	Grid2 interacting protein	16	protein_coding
Up	ENSMGAG00000018990	2.60359	0.00104	COL11A1	collagen type XI alpha 1 chain [ Meleagris gallopavo (turkey) ]	10	protein_coding
Up	ENSMGAG00000020856	2.49915	0.0144	ENSMGAG00000020856	novel protein coding gene	10	protein_coding
Up	ENSMGAG00000012831	2.45639	0.00745	KCNQ3	potassium voltage-gated channel subfamily Q member 3	3	protein_coding
Up	ENSMGAG00000010353	2.41188	0.0216	ENSMGAG00000010353	Uncharacterized protein	11	protein_coding
Up	ENSMGAG00000016222	2.37508	0.0411	LOC104916038	C5a anaphylatoxin chemotactic receptor 1-like	KN387613.1	protein_coding
Up	ENSMGAG00000002460	2.34839	0.0456	LOC100540415	LIM homeobox transcription factor 1-alpha-like	1	protein_coding
Up	ENSMGAG00000012743	2.33302	0.000676	LOC100547940	nebulin-like	7	protein_coding
Up	ENSMGAG00000011492	2.30877	0.000411	LOC100550389	general transcription factor IIE subunit 1-like	4	protein_coding
Up	ENSMGAG00000018721	2.28889	0.00019	ENSMGAG00000018721	novel protein coding gene	28	protein_coding
Up	ENSMGAG00000022669	2.22927	0.000665	ENSMGAG00000022669	novel protein coding gene	14	protein_coding
Up	ENSMGAG00000022182	2.20864	0.0157	ENSMGAG00000022182	pseudogene	30	pseudogene
Up	ENSMGAG00000019068	2.17211	0.0297	ENSMGAG00000019068	novel protein coding gene	ADDD02167652.1	protein_coding
Up	ENSMGAG00000003954	2.16539	0.00045	TRPM2	transient receptor potential cation channel subfamily M member 2	11	protein_coding
Up	ENSMGAG00000008970	2.15513	0.0472	IL5	Interleukin-5 (Eosinophil differentiation factor)	15	protein_coding
Up	ENSMGAG00000009627	2.12009	0.00686	LOXL4	lysyl oxidase like 4 [Source:HGNC Symbol;Acc:HGNC:17171]	8	protein_coding
Up	ENSMGAG00000018665	2.0968	0.0422	ENSMGAG00000018665	novel protein coding gene	3	protein_coding
Up	ENSMGAG00000020152	2.07934	0.0133	IL31RA	interleukin 31 receptor A [Source:NCBI gene;Acc:427140] ortholog	Z	protein_coding
Up	ENSMGAG00000019906	2.04769	0.0186	ENSMGAG00000019906	novel protein coding gene	6	protein_coding
Up	ENSMGAG00000021747	2.04353	0.0256	ENSMGAG00000021747	lncRNA	10	lncRNA
Up	ENSMGAG00000007531	2.04249	0.0374	HDC	histidine decarboxylase [Source:HGNC Symbol;Acc:HGNC:4855]	12	protein_coding
Up	ENSMGAG00000008501	1.97644	0.00306	DUSP8	dual specificity phosphatase 8	5	protein_coding
Up	ENSMGAG00000017102	1.97569	6.69e-06	ABCA7	ATP binding cassette subfamily A member 7	30	pseudogene
Up	ENSMGAG00000006860	1.92472	0.0293	VSIG1	V-set and immunoglobulin domain containing 1 [Source:HGNC Symbol;Acc:HGNC:28675]	9	protein_coding
Up	ENSMGAG00000009753	1.89742	0.0273	CNTF	ciliary neurotrophic factor [Source:HGNC Symbol;Acc:HGNC:2169]	5	protein_coding
Up	ENSMGAG00000002340	1.87016	0.0073	ATP8B3	ATPase phospholipid transporting 8B3	30	protein_coding
Up	ENSMGAG00000015113	1.87009	0.0124	AMER2	APC membrane recruitment protein 2	1	protein_coding
Up	ENSMGAG00000008458	1.85634	0.0343	TCF7	transcription factor 7 (T-cell specific, HMG-box)	15	protein_coding
Up	ENSMGAG00000004808	1.80798	0.00307	SBK1	SH3 domain binding kinase 1	ADDD02196186.1	protein_coding
Up	ENSMGAG00000018134	1.80272	0.0141	HIVEP3	HIVEP zinc finger 3	25	protein_coding
Up	ENSMGAG00000018474	1.78992	0.000883	TNFSF15	TNF superfamily member 15 [Source:HGNC Symbol;Acc:HGNC:11931]	19	protein_coding
Up	ENSMGAG00000003016	1.7871	0.000657	FBLN7	fibulin 7	2	protein_coding
Up	ENSMGAG00000007059	1.7861	0.0359	SLC16A6	solute carrier family 16 member 6	20	protein_coding
Up	ENSMGAG00000010729	1.74141	0.0363	CREB5	cAMP responsive element binding protein 5	6	protein_coding
Up	ENSMGAG00000014499	1.73021	0.000879	ADAMTS5	ADAM metallopeptidase with thrombospondin type 1 motif 5 [Source:HGNC Symbol;Acc:HGNC:221]	1	protein_coding
Up	ENSMGAG00000001314	1.71848	1.86e-05	LOXL2	lysyl oxidase like 2	24	protein_coding
Up	ENSMGAG00000007262	1.69941	0.0206	MYLK2	myosin light chain kinase 2	22	protein_coding
Up	ENSMGAG00000021720	1.69389	0.00962	ENSMGAG00000021720	novel protein coding gene	14	protein_coding
Up	ENSMGAG00000007739	1.67746	0.0222	NR4A3	nuclear receptor subfamily 4 group A member 3	3	protein_coding
Up	ENSMGAG00000016506	1.63555	0.00713	ENSMGAG00000016506	Uncharacterized protein	10	protein_coding
Up	ENSMGAG00000018129	1.63156	0.00799	LOC104914090	neurofilament heavy polypeptide-like	22	protein_coding
Up	ENSMGAG00000021034	1.63103	0.0413	NR4A1	nuclear receptor subfamily 4 group A member 1	KN387950.1	protein_coding
Up	ENSMGAG00000017084	1.58068	0.0331	RHOBTB3	Rho related BTB domain containing 3 [Source:HGNC Symbol;Acc:HGNC:18757]	Z	protein_coding
Up	ENSMGAG00000019396	1.58058	0.00862	ENSMGAG00000019396	lncRNA	26	lncRNA
Up	ENSMGAG00000001940	1.57714	0.00663	EFEMP1	EGF containing fibulin extracellular matrix protein 1	2	protein_coding
Up	ENSMGAG00000021444	1.57332	0.0101	LHX1	LIM homeobox 1 [Source:NCBI gene;Acc:396381] ortholog	ADDD02119651.1	protein_coding
Up	ENSMGAG00000009067	1.56411	0.0362	ENSMGAG00000009067	Uncharacterized protein	22	protein_coding
Up	ENSMGAG00000004919	1.55437	0.032	CCDC3	coiled-coil domain containing 3 [Source:HGNC Symbol;Acc:HGNC:23813]	1	protein_coding
Up	ENSMGAG00000007924	1.54828	0.00966	LHX1	LIM homeobox 1	21	protein_coding
Up	ENSMGAG00000010740	1.54351	0.00149	TRIL	TLR4 interactor with leucine rich repeats	6	protein_coding
Up	ENSMGAG00000007857	1.54137	0.00942	DHRS11	dehydrogenase/reductase 11	21	protein_coding
Up	ENSMGAG00000001087	1.538	0.00692	LOC100541326	zinc metalloproteinase-disintegrin-like MTP4	24	protein_coding
Up	ENSMGAG00000010572	1.53591	0.00585	FGF2	fibroblast growth factor 2 [Source:HGNC Symbol;Acc:HGNC:3676]	4	protein_coding
Up	ENSMGAG00000001969	1.53154	0.00499	UBASH3B	ubiquitin associated and SH3 domain containing B [Source:HGNC Symbol;Acc:HGNC:29884]	26	protein_coding
Up	ENSMGAG00000022754	1.51428	0.0222	ENSMGAG00000022754	filamin-A-like	ADDD02212084.1	protein_coding
Up	ENSMGAG00000007470	1.50509	0.00159	PKD2	polycystin 2, transient receptor potential cation channel [Source:HGNC Symbol;Acc:HGNC:9009]	4	protein_coding
Up	ENSMGAG00000022612	1.49514	0.0318	DGKH	diacylglycerol kinase eta [Source:NCBI gene;Acc:769506] ortholog	1	protein_coding
Up	ENSMGAG00000022379	1.49419	0.00187	ENSMGAG00000022379	novel protein coding gene	2	protein_coding
Up	ENSMGAG00000023011	1.49128	0.0159	ENSMGAG00000023011	novel protein coding gene	2	protein_coding
Up	ENSMGAG00000000941	1.48894	0.000208	GNAO1	G protein subunit alpha o1	13	protein_coding
Up	ENSMGAG00000013931	1.47436	0.0124	ENSMGAG00000013931	Uncharacterized protein	KN388451.1	protein_coding
Up	ENSMGAG00000007922	1.45456	0.047	MEGF10	multiple EGF like domains 10 [Source:HGNC Symbol;Acc:HGNC:29634]	Z	protein_coding
Up	ENSMGAG00000009547	1.44979	0.0161	RASL12	RAS like family 12 [Source:HGNC Symbol;Acc:HGNC:30289]	12	protein_coding
Up	ENSMGAG00000000660	1.43657	0.0433	GFAP	glial fibrillary acidic protein [Source:HGNC Symbol;Acc:HGNC:4235]	29	protein_coding
Up	ENSMGAG00000019620	1.43305	0.00411	LOC100549193	pseudouridine-metabolizing bifunctional protein C1861.05-like [ Meleagris gallopavo (turkey) ]	1	protein_coding
Up	ENSMGAG00000006441	1.42677	0.033	LOC100548707	collagen alpha-1 (XI) chain-like	10	protein_coding
Up	ENSMGAG00000006934	1.42675	0.000591	LOC100545752	ATP-binding cassette sub-family A member 10	20	protein_coding
Up	ENSMGAG00000011216	1.42664	0.00246	LTK	leukocyte receptor tyrosine kinase	5	protein_coding
Up	ENSMGAG00000019033	1.4232	0.0396	SLC3A1	solute carrier family 3 member 1 [Source:NCBI gene;Acc:428569] ortholog	ADDD02222025.1	protein_coding
Up	ENSMGAG00000022553	1.41221	0.0337	ENSMGAG00000022553	homeodomain protein [Source:NCBI gene;Acc:395769] ortholog	7	protein_coding
Up	ENSMGAG00000022376	1.39289	0.0312	ENSMGAG00000022376	novel protein coding gene	ADDD02199392.1	protein_coding
Up	ENSMGAG00000004221	1.3893	0.0337	LOC100538944	dynamin-3-like	10	protein_coding
Up	ENSMGAG00000000873	1.38599	0.00333	EDA2R	ectodysplasin A2 receptor	9	protein_coding
Up	ENSMGAG00000009551	1.3676	0.0273	CNNM1	cyclin and CBS domain divalent metal cation transport mediator 1 [Source:HGNC Symbol;Acc:HGNC:102]	8	protein_coding
Up	ENSMGAG00000022104	1.35827	0.0105	ENSMGAG00000022104	novel protein coding gene	16	protein_coding
Up	ENSMGAG00000003520	1.3548	0.0255	ENSMGAG00000003520	Uncharacterized protein	KN388630.1	protein_coding
Up	ENSMGAG00000011406	1.34841	0.0139	PRKAG3	protein kinase AMP-activated non-catalytic subunit gamma 3	7	protein_coding
Up	ENSMGAG00000021644	1.34163	0.0297	ENSMGAG00000021644	novel protein coding gene	7	protein_coding
Up	ENSMGAG00000020583	1.33991	0.000588	ENSMGAG00000020583	novel protein coding gene	KN388139.1	protein_coding
Up	ENSMGAG00000005677	1.33027	0.028	FAM78A	family with sequence similarity 78 member A [Source:HGNC Symbol;Acc:HGNC:25465]	19	protein_coding
Up	ENSMGAG00000008100	1.32862	0.0105	CEMIP	cell migration inducing hyaluronidase 1 [Source:HGNC Symbol;Acc:HGNC:29213]	12	protein_coding
Up	ENSMGAG00000004996	1.3284	0.0274	ADAM19	ADAM metallopeptidase domain 19 [Source:HGNC Symbol;Acc:HGNC:197]	15	protein_coding
Up	ENSMGAG00000022203	1.32683	0.0107	ENSMGAG00000022203	novel protein coding gene	ADDD02175681.1	protein_coding
Up	ENSMGAG00000022975	1.32235	0.0147	CDK6	cyclin dependent kinase 6 [Source:HGNC Symbol;Acc:HGNC:1777]	6	protein_coding
Up	ENSMGAG00000020401	1.31589	7.64e-05	ENSMGAG00000020401	novel protein coding gene	30	protein_coding
Up	ENSMGAG00000000952	1.31266	0.00962	PER3	period circadian regulator 3 [Source:HGNC Symbol;Acc:HGNC:8847]	23	protein_coding
Up	ENSMGAG00000013385	1.31239	0.0109	DSE	dermatan sulfate epimerase	2	protein_coding
Up	ENSMGAG00000020036	1.31216	0.00421	ENSMGAG00000020036	lncRNA	23	lncRNA
Up	ENSMGAG00000021030	1.31215	0.000996	CELSR2	cadherin EGF LAG seven-pass G-type receptor 2 [Source:NCBI gene;Acc:430126] ortholog	KN387089.1	protein_coding
Up	ENSMGAG00000015034	1.30111	0.0052	THSD1	thrombospondin type 1 domain containing 1 [Source:HGNC Symbol;Acc:HGNC:17754]	1	protein_coding
Up	ENSMGAG00000006630	1.29399	0.00281	ADAMTSL2	ADAMTS like 2 [Source:HGNC Symbol;Acc:HGNC:14631]	19	protein_coding
Up	ENSMGAG00000006638	1.28566	0.0148	SOX9	SRY-box 9	20	protein_coding
Up	ENSMGAG00000000717	1.28494	0.00637	SDC3	syndecan 3 [Source:NCBI gene (formerly Entrezgene);Acc:100303706]	25	protein_coding
Up	ENSMGAG00000017838	1.2827	0.0394	LOC100541562	putative P2Y purinoceptor 10	9	protein_coding
Up	ENSMGAG00000009585	1.27786	0.0242	LOC100548974	uncharacterized LOC100548974	17	protein_coding
Up	ENSMGAG00000002190	1.27658	0.00547	TECTA	tectorin alpha [Source:HGNC Symbol;Acc:HGNC:11720]	26	protein_coding
Up	ENSMGAG00000021478	1.27587	0.00113	ENSMGAG00000021478	proline dehydrogenase 1 [Source:NCBI gene;Acc:770734] ortholog	17	protein_coding
Up	ENSMGAG00000012023	1.27516	0.000866	LOC100546910	semaphorin-5B	7	protein_coding
Up	ENSMGAG00000021673	1.27322	0.00183	ENSMGAG00000021673	novel protein coding gene	7	protein_coding
Up	ENSMGAG00000006545	1.26754	0.00799	ADAMTS13	ADAM metallopeptidase with thrombospondin type 1 motif 13 [Source:HGNC Symbol;Acc:HGNC:1366]	19	protein_coding
Up	ENSMGAG00000022603	1.26519	0.0341	LOC104914976	putative ankyrin repeat domain-containing protein 31	Z	protein_coding
Up	ENSMGAG00000020875	1.2636	0.0346	ENSMGAG00000020875	novel protein coding gene	ADDD02273043.1	protein_coding
Up	ENSMGAG00000020037	1.26359	0.0159	PCDHGC5	protocadherin gamma subfamily C, 5 [Source:HGNC Symbol;Acc:HGNC:8718]	15	protein_coding
Up	ENSMGAG00000021807	1.25697	0.0362	ENSMGAG00000021807	novel protein coding gene	KN389246.1	protein_coding
Up	ENSMGAG00000021564	1.25291	0.0346	ENSMGAG00000021564	novel protein coding gene	14	protein_coding
Up	ENSMGAG00000022283	1.25262	0.00452	CLCF1	cardiotrophin like cytokine factor 1 [Source:HGNC Symbol;Acc:HGNC:17412]	KN389200.1	protein_coding
Up	ENSMGAG00000015916	1.25197	0.0443	FIGN	fidgetin, microtubule severing factor	7	protein_coding
Up	ENSMGAG00000020144	1.24714	0.00173	ENSMGAG00000020144	novel protein coding gene	23	protein_coding
Up	ENSMGAG00000022243	1.24368	0.0394	ENSMGAG00000022243	novel protein coding gene	7	protein_coding
Up	ENSMGAG00000007700	1.24099	0.00278	CERK	ceramide kinase	1	protein_coding
Up	ENSMGAG00000009567	1.23652	0.028	HPSE2	heparanase 2 (inactive) [Source:HGNC Symbol;Acc:HGNC:18374]	8	protein_coding
Up	ENSMGAG00000006965	1.23499	0.0417	STK35	Serine/threonine kinase 35	22	protein_coding
Up	ENSMGAG00000021527	1.22789	0.0168	ENSMGAG00000021527	lncRNA	5	lncRNA
Up	ENSMGAG00000020921	1.22676	0.0411	SLC1A3	solute carrier family 1 member 3 [Source:HGNC Symbol;Acc:HGNC:10941]	Z	protein_coding
Up	ENSMGAG00000022778	1.22382	0.000145	LOC100550420	deleted in malignant brain tumors 1 protein-like [ Meleagris gallopavo (turkey) ]	1	protein_coding
Up	ENSMGAG00000018389	1.22012	0.0488	ENSMGAG00000018389	novel protein coding gene	KN389186.1	protein_coding
Up	ENSMGAG00000014682	1.21409	0.0134	REPS2	RALBP1 associated Eps domain containing 2	1	protein_coding
Up	ENSMGAG00000006647	1.214	0.0245	ROR2	Receptor tyrosine kinase like orphan receptor 2	Z	protein_coding
Up	ENSMGAG00000017545	1.21327	0.00679	ENSMGAG00000017545	novel protein coding gene	14	protein_coding
Up	ENSMGAG00000005776	1.20944	0.0239	SLCO4A1	solute carrier organic anion transporter family member 4A1	22	protein_coding
Up	ENSMGAG00000002440	1.20923	0.0261	GDPD2	glycerophosphodiester phosphodiesterase domain containing 2	9	protein_coding
Up	ENSMGAG00000015640	1.20769	0.0152	TSKU	Tsukushi, small leucine rich proteoglycan	1	protein_coding
Up	ENSMGAG00000017132	1.20275	0.00603	ENSMGAG00000017132	Uncharacterized protein	Z	protein_coding
Up	ENSMGAG00000021678	1.20084	0.0307	ENSMGAG00000021678	novel protein coding gene	6	protein_coding
Up	ENSMGAG00000018238	1.1947	0.0265	LOC104911440	macrophage mannose receptor 1-like [ Meleagris gallopavo (turkey) ]	6	protein_coding
Up	ENSMGAG00000018373	1.19005	0.0399	ENSMGAG00000018373	novel protein coding gene	7	protein_coding
Up	ENSMGAG00000020640	1.18658	0.0146	ENSMGAG00000020640	novel protein coding gene	ADDD02182185.1	protein_coding
Up	ENSMGAG00000009635	1.18345	0.00332	PROX1	prospero homeobox 1 [Source:HGNC Symbol;Acc:HGNC:9459]	2	protein_coding
Up	ENSMGAG00000007781	1.17987	9.01e-05	GRIP2	glutamate receptor interacting protein 2 [Source:HGNC Symbol;Acc:HGNC:23841]	14	protein_coding
Up	ENSMGAG00000002923	1.17976	0.0142	C1QTNF2	C1q and TNF related 2 [Source:HGNC Symbol;Acc:HGNC:14325]	15	protein_coding
Up	ENSMGAG00000003214	1.17971	0.00277	ARHGEF37	Rho guanine nucleotide exchange factor 37 [Source:HGNC Symbol;Acc:HGNC:34430]	15	protein_coding
Up	ENSMGAG00000019498	1.17737	0.00037	TP53INP2	tumor protein p53 inducible nuclear protein 2 [Source:NCBI gene;Acc:769066] ortholog	22	protein_coding
Up	ENSMGAG00000001111	1.16856	0.00467	STX1A	syntaxin 1A	21	protein_coding
Up	ENSMGAG00000007271	1.16835	0.031	HRASLS	phospholipase A and acyltransferase 1	11	protein_coding
Up	ENSMGAG00000009478	1.16707	0.0144	ENSMGAG00000009478	Uncharacterized protein	1	protein_coding
Up	ENSMGAG00000019706	1.15939	0.0272	ENSMGAG00000019706	lncRNA	6	lncRNA
Up	ENSMGAG00000004741	1.15787	0.0429	ARL10	ADP ribosylation factor like GTPase 10 [Source:HGNC Symbol;Acc:HGNC:22042]	15	protein_coding
Up	ENSMGAG00000004798	1.15488	0.017	CDH23	cadherin related 23 [Source:HGNC Symbol;Acc:HGNC:13733]	8	protein_coding
Up	ENSMGAG00000001949	1.15205	0.0406	COL15A1	Collagen type XV alpha 1 chain	3	protein_coding
Up	ENSMGAG00000019172	1.14241	0.0448	EFHD2	EF-hand domain family member D2 [Source:HGNC Symbol;Acc:HGNC:28670]	23	protein_coding
Up	ENSMGAG00000009346	1.14025	0.0206	NFATC2	nuclear factor of activated T cells 2 [Source:HGNC Symbol;Acc:HGNC:7776]	22	protein_coding
Up	ENSMGAG00000018181	1.14009	0.0419	ENSMGAG00000018181	novel protein coding gene	ADDD02241985.1	protein_coding
Up	ENSMGAG00000022409	1.13722	0.000883	ENSMGAG00000022409	novel protein coding gene	23	protein_coding
Up	ENSMGAG00000017847	1.13684	0.0123	COL5A1	collagen type V alpha 1 chain [Source:NCBI gene;Acc:395568]ortholog	19	protein_coding
Up	ENSMGAG00000015502	1.13639	0.0166	ENSMGAG00000015502	DNA-(apurinic or apyrimidinic site) endonuclease (EC 3.1.-.-)	ADDD02185897.1	protein_coding
Up	ENSMGAG00000003438	1.13379	5.54e-05	PALM	paralemmin	30	protein_coding
Up	ENSMGAG00000001405	1.13344	0.0438	RNF165	ring finger protein 165 [Source:HGNC Symbol;Acc:HGNC:31696]	Z	protein_coding
Up	ENSMGAG00000007612	1.12994	0.0233	ENSMGAG00000007612	Uncharacterized protein	13	protein_coding
Up	ENSMGAG00000019598	1.11432	0.0188	LOC100546606	probable cation-transporting ATPase 13A4	11	protein_coding
Up	ENSMGAG00000002329	1.10916	0.00723	LOC100547197	SRC kinase signaling inhibitor 1-like	29	protein_coding
Up	ENSMGAG00000020714	1.10848	0.00756	LZTS3	leucine zipper tumor suppressor family member 3 [Source:NCBI gene;Acc:426948] ortholog	4	protein_coding
Up	ENSMGAG00000001287	1.1048	0.0465	PTGS2	prostaglandin-endoperoxide synthase 2 [Source:HGNC Symbol;Acc:HGNC:9605]	10	protein_coding
Up	ENSMGAG00000001734	1.09526	0.0383	LZTS1	leucine zipper tumor suppressor 1 [Source:HGNC Symbol;Acc:HGNC:13861]	24	protein_coding
Up	ENSMGAG00000017256	1.0949	0.0395	ENSMGAG00000017256	ANK_REP_REGION domain-containing protein	4	protein_coding
Up	ENSMGAG00000022154	1.0943	0.00966	ENSMGAG00000022154	novel protein coding gene	1	protein_coding
Up	ENSMGAG00000006856	1.09394	0.00441	PDGFRB	platelet derived growth factor receptor beta	15	protein_coding
Up	ENSMGAG00000018110	1.09064	0.0376	ENSMGAG00000018110	collagen type XXIV alpha 1 chain [Source:NCBI gene;Acc:424526] ortholog	10	protein_coding
Up	ENSMGAG00000004601	1.08881	0.0176	CALCRL	calcitonin receptor like receptor [Source:HGNC Symbol;Acc:HGNC:16709]	7	protein_coding
Up	ENSMGAG00000005382	1.08725	0.00599	CPAMD8	C3 and PZP like alpha-2-macroglobulin domain containing 8 [Source:HGNC Symbol;Acc:HGNC:23228]	30	protein_coding
Up	ENSMGAG00000019246	1.08349	0.00332	ENSMGAG00000019246	pseudogene	23	pseudogene
Up	ENSMGAG00000011929	1.07918	0.0233	DCLK3	doublecortin like kinase 3 [Source:HGNC Symbol;Acc:HGNC:19005]	6	protein_coding
Up	ENSMGAG00000009779	1.07864	0.000546	WIPF1	WAS/WASL interacting protein family member 1	7	protein_coding
Up	ENSMGAG00000004154	1.07666	0.0129	SFMBT2	Scm like with four mbt domains 2	1	protein_coding
Up	ENSMGAG00000019036	1.07662	0.014	ENSMGAG00000019036	novel protein coding gene	5	protein_coding
Up	ENSMGAG00000004212	1.07296	0.0202	PLXNA2	plexin A2	28	protein_coding
Up	ENSMGAG00000022032	1.06992	5.01e-05	PHLDB1	pleckstrin homology like domain family B member 1 [Source:NCBI gene;Acc:419790] ortholog	26	protein_coding
Up	ENSMGAG00000016688	1.06924	0.0334	LOC100545106	rho guanine nucleotide exchange factor 38-like	4	protein_coding
Up	ENSMGAG00000001887	1.06459	0.0199	RGS3	regulator of G protein signaling 3 [Source:HGNC Symbol;Acc:HGNC:9999]	19	protein_coding
Up	ENSMGAG00000003469	1.06278	0.00216	SH2B2	SH2B adaptor protein 2	21	protein_coding
Up	ENSMGAG00000015146	1.06077	0.00265	ENSMGAG00000015146	Uncharacterized protein	1	protein_coding
Up	ENSMGAG00000021176	1.06003	0.00394	CBARP	CACN subunit beta associated regulatory protein [Source:HGNC Symbol;Acc:HGNC:28617]	KN389550.1	protein_coding
Up	ENSMGAG00000000706	1.05745	0.00173	SIK2	salt inducible kinase 2	26	protein_coding
Up	ENSMGAG00000015171	1.05596	0.0216	LOC100543400	matrix metalloproteinase-27-like	1	protein_coding
Up	ENSMGAG00000002447	1.05189	0.0139	PHOSPHO1	phosphoethanolamine/phosphocholine phosphatase 1 [Source:HGNC Symbol;Acc:HGNC:16815]	29	protein_coding
Up	ENSMGAG00000019113	1.04844	0.00337	ENSMGAG00000019113	novel protein coding gene	11	protein_coding
Up	ENSMGAG00000002317	1.04774	0.0448	ETV4	ETS variant transcription factor 4 [Source:HGNC Symbol;Acc:HGNC:3493]	29	protein_coding
Up	ENSMGAG00000013302	1.03571	0.019	ENSMGAG00000013302	Uncharacterized protein	1	protein_coding
Up	ENSMGAG00000018371	1.03298	0.00187	LOC104914876	integrin alpha-1-like	Z	protein_coding
Up	ENSMGAG00000021913	1.03037	0.00407	SKI	SKI proto-oncogene [Source:NCBI gene;Acc:428181] ortholog	23	protein_coding
Up	ENSMGAG00000003066	1.03006	0.013	ACAP3	ArfGAP with coiled-coil, ankyrin repeat and PH domains 3 [Source:HGNC Symbol;Acc:HGNC:16754]	23	protein_coding
Up	ENSMGAG00000003783	1.02116	0.0135	ENSMGAG00000003783	TPR_REGION domain-containing protein	19	protein_coding
Up	ENSMGAG00000004585	1.02011	0.00136	MLXIP	MLX interacting protein [Source:HGNC Symbol;Acc:HGNC:17055]	17	protein_coding
Up	ENSMGAG00000019946	1.01509	0.00968	RFLNA	refilin A [Source:HGNC Symbol;Acc:HGNC:27051]	17	protein_coding
Up	ENSMGAG00000009150	1.01182	0.000435	ADAMTS9	ADAM metallopeptidase with thrombospondin type 1 motif 9 [Source:HGNC Symbol;Acc:HGNC:13202]	14	protein_coding
Up	ENSMGAG00000020991	1.01019	0.0161	TSPAN4	tetraspanin 4 [Source:HGNC Symbol;Acc:HGNC:11859]	5	protein_coding
Up	ENSMGAG00000020630	1.00865	0.0126	ENSMGAG00000020630	novel protein coding gene	ADDD02125791.1	protein_coding
Up	ENSMGAG00000006490	1.00694	0.025	LOC100549696	peroxidasin homolog	22	protein_coding
Up	ENSMGAG00000000667	1.00276	1.02e-05	MEF2D	myocyte enhancer factor 2D	27	protein_coding
Up	ENSMGAG00000001789	1.00198	0.00336	COL6A1	collagen type VI alpha 1 chain	7	protein_coding
Up	ENSMGAG00000002477	0.999364	0.00153	RASAL2	RAS protein activator like 2	10	protein_coding
Up	ENSMGAG00000019756	0.997696	0.00158	LIX1L	limb and CNS expressed 1 like [Source:HGNC Symbol;Acc:HGNC:28715] ortholog	KN388956.1	protein_coding
Up	ENSMGAG00000001389	0.993391	0.00429	ENSMGAG00000001389	pseudogene	25	pseudogene
Up	ENSMGAG00000001302	0.991787	0.0446	TCP11L1	t-complex 11 like 1 [Source:HGNC Symbol;Acc:HGNC:25655]	5	protein_coding
Up	ENSMGAG00000019309	0.989335	0.000577	ENSMGAG00000019309	novel protein coding gene	KN389232.1	protein_coding
Up	ENSMGAG00000012060	0.987293	0.0255	ATP10D	ATPase phospholipid transporting 10D (putative)	4	protein_coding
Up	ENSMGAG00000001513	0.987047	0.0316	CACNA2D2	calcium voltage-gated channel auxiliary subunit alpha2delta 2 [Source:HGNC Symbol;Acc:HGNC:1400]	14	protein_coding
Up	ENSMGAG00000003374	0.986751	0.0218	ANO8	anoctamin 8 [Source:HGNC Symbol;Acc:HGNC:29329]	30	protein_coding
Up	ENSMGAG00000013235	0.980379	0.00782	LZTS3	leucine zipper tumor suppressor family member 3	4	protein_coding
Up	ENSMGAG00000003977	0.978188	0.0157	TMEM8B	Transmembrane protein 8B	Z	protein_coding
Up	ENSMGAG00000017782	0.966379	0.0212	LOC104911318	uncharacterized LOC104911318	6	protein_coding
Up	ENSMGAG00000004386	0.964621	0.0218	IPPK	inositol-pentakisphosphate 2-kinase [Source:HGNC Symbol;Acc:HGNC:14645]	14	protein_coding
Up	ENSMGAG00000000949	0.964428	0.0205	HIC2	HIC ZBTB transcriptional repressor 2	17	protein_coding
Up	ENSMGAG00000005966	0.962925	0.0372	ANKRD13B	ankyrin repeat domain 13B	21	pseudogene
Up	ENSMGAG00000008902	0.962712	0.00085	SSH2	slingshot protein phosphatase 2	21	protein_coding
Up	ENSMGAG00000001543	0.95893	2.2e-05	NAV1	neuron navigator 1	28	protein_coding
Up	ENSMGAG00000019120	0.957565	0.0216	ENSMGAG00000019120	novel protein coding gene	23	protein_coding
Up	ENSMGAG00000016757	0.957467	0.000346	ENSMGAG00000016757	PID domain-containing protein	19	protein_coding
Up	ENSMGAG00000003647	0.957192	0.00463	GRIN3B	Glutamate receptor	30	protein_coding
Up	ENSMGAG00000007461	0.95303	0.000633	NOTCH1	notch receptor 1 [Source:HGNC Symbol;Acc:HGNC:7881]	19	protein_coding
Up	ENSMGAG00000007044	0.952858	0.0231	LOC104914173	CDP-diacylglycerol--serine O-phosphatidyltransferase	23	protein_coding
Up	ENSMGAG00000002726	0.946612	0.0436	SLC7A11	solute carrier family 7 member 11 [Source:HGNC Symbol;Acc:HGNC:11059]	4	protein_coding
Up	ENSMGAG00000001805	0.943565	0.0033	ENSMGAG00000001805	Microtubule-associated protein	29	protein_coding
Up	ENSMGAG00000008983	0.942755	0.0231	MCOLN3	mucolipin TRP cation channel 3 [Source:HGNC Symbol;Acc:HGNC:13358]	10	protein_coding
Up	ENSMGAG00000011359	0.941609	0.00779	RGS10	regulator of G protein signaling 10	8	protein_coding
Up	ENSMGAG00000017955	0.941392	0.034	ENSMGAG00000017955	novel protein coding gene	1	protein_coding
Up	ENSMGAG00000020211	0.941337	0.0245	ENSMGAG00000020211	novel protein coding gene	17	protein_coding
Up	ENSMGAG00000005953	0.938617	0.0014	PKD1	polycystin 1, transient receptor potential channel interacting	16	protein_coding
Up	ENSMGAG00000001803	0.936055	0.0245	ADAMTS10	ADAM metallopeptidase with thrombospondin type 1 motif 10	30	protein_coding
Up	ENSMGAG00000013469	0.935747	0.0439	LOC100547920	cat eye syndrome critical region protein 2-like	1	protein_coding
Up	ENSMGAG00000011042	0.933262	0.00228	CREB3L1	cAMP responsive element binding protein 3 like 1 [Source:HGNC Symbol;Acc:HGNC:18856]	5	protein_coding
Up	ENSMGAG00000009088	0.930283	0.0423	LOC100548146	vitellogenin-2	10	protein_coding
Up	ENSMGAG00000020483	0.928735	0.0162	LOC100544965	macrophage mannose receptor 1-like [ Meleagris gallopavo (turkey) ]	6	protein_coding
Up	ENSMGAG00000018838	0.928504	0.000747	BCAR1	BCAR1, Cas family scaffolding protein [Source:NCBI gene;Acc:415691] ortholog	13	protein_coding
Up	ENSMGAG00000022986	0.925623	0.0246	TRIB1	tribbles pseudokinase 1 [ Meleagris gallopavo (turkey) ]	3	protein_coding
Up	ENSMGAG00000004343	0.922475	0.00281	COL16A1	collagen type XVI alpha 1 chain	25	protein_coding
Up	ENSMGAG00000018670	0.91549	0.0471	ENSMGAG00000018670	novel protein coding gene	ADDD02066917.1	protein_coding
Up	ENSMGAG00000013780	0.911795	0.0088	FRMD6	FERM domain containing 6	5	protein_coding
Up	ENSMGAG00000002656	0.909789	0.0246	TMEM184A	transmembrane protein 184A	16	protein_coding
Up	ENSMGAG00000008169	0.907424	0.0293	CRB2	crumbs cell polarity complex component 2 [Source:HGNC Symbol;Acc:HGNC:18688]	19	protein_coding
Up	ENSMGAG00000018224	0.907388	0.0247	ENSMGAG00000018224	ATP-binding cassette, sub-family A (ABC1), member 9 [Source:NCBI gene;Acc:417443] ortholog	20	protein_coding
Up	ENSMGAG00000007002	0.905632	0.0421	LOC100540476	tau-tubulin kinase 1-like	2	protein_coding
Up	ENSMGAG00000017693	0.905263	0.0346	ENSMGAG00000017693	novel protein coding gene	ADDD02089473.1	protein_coding
Up	ENSMGAG00000015090	0.903582	0.00434	SLC7A1	solute carrier family 7 member 1	1	protein_coding
Up	ENSMGAG00000005673	0.902604	0.0436	ZNF76	zinc finger protein 76 [Source:HGNC Symbol;Acc:HGNC:13149]	28	protein_coding
Up	ENSMGAG00000000799	0.901148	0.0234	SERINC2	serine incorporator 2 [Source:HGNC Symbol;Acc:HGNC:23231]	25	protein_coding
Up	ENSMGAG00000001098	0.900856	0.0283	TRIM2	tripartite motif containing 2 [Source:HGNC Symbol;Acc:HGNC:15974]	4	protein_coding
Up	ENSMGAG00000013491	0.898229	0.000271	NPTXR	Neuronal pentraxin receptor	1	protein_coding
Up	ENSMGAG00000007825	0.896082	0.0103	SLC6A6	solute carrier family 6 member 6 [Source:HGNC Symbol;Acc:HGNC:11052]	14	protein_coding
Up	ENSMGAG00000005110	0.896026	0.0296	CYFIP2	cytoplasmic FMR1 interacting protein 2 [Source:HGNC Symbol;Acc:HGNC:13760]	15	protein_coding
Up	ENSMGAG00000002103	0.895925	0.0141	NCKAP1L	NCK associated protein 1 like	KN389043.1	protein_coding
Up	ENSMGAG00000007037	0.895316	0.00633	ENSMGAG00000007037	Uncharacterized protein	21	protein_coding
Up	ENSMGAG00000018281	0.893799	0.0292	ENSMGAG00000018281	E3 SUMO-protein ligase PIAS2-like	ADDD02129418.1	protein_coding
Up	ENSMGAG00000016921	0.893578	0.000633	ENSMGAG00000016921	RING-type domain-containing protein	16	protein_coding
Up	ENSMGAG00000015371	0.891672	0.00539	FLRT2	fibronectin leucine rich transmembrane protein 2 [Source:HGNC Symbol;Acc:HGNC:3761]	5	protein_coding
Up	ENSMGAG00000014203	0.889929	9.35e-05	EPHB6	ephrin type-B receptor 5	1	protein_coding
Up	ENSMGAG00000000775	0.883569	0.00231	SOGA1	suppressor of glucose, autophagy associated 1	22	protein_coding
Up	ENSMGAG00000020808	0.882235	0.0383	ENSMGAG00000020808	novel protein coding gene	KN388275.1	protein_coding
Up	ENSMGAG00000017313	0.878573	0.00676	C6orf132	Chromosome 6 open reading frame 132	28	protein_coding
Up	ENSMGAG00000007227	0.877705	0.0295	LOC100549247	ATP-binding cassette sub-family D member 2	1	protein_coding
Up	ENSMGAG00000007571	0.876138	0.0216	LOC100549525	lipoma-preferred partner homolog	11	protein_coding
Up	ENSMGAG00000005714	0.872398	0.00187	ARL16	ADP ribosylation factor like GTPase 16	20	protein_coding
Up	ENSMGAG00000002828	0.869406	0.0025	NBEAL2	neurobeachin like 2 [Source:HGNC Symbol;Acc:HGNC:31928]	6	protein_coding
Up	ENSMGAG00000013359	0.868159	0.0369	MOK	MOK protein kinase [Source:HGNC Symbol;Acc:HGNC:9833]	5	protein_coding
Up	ENSMGAG00000006193	0.867687	0.0314	SPECC1	sperm antigen with calponin homology and coiled-coil domains 1	21	protein_coding
Up	ENSMGAG00000014173	0.862254	0.00734	PEAR1	platelet endothelial aggregation receptor 1 [Source:HGNC Symbol;Acc:HGNC:33631]	27	protein_coding
Up	ENSMGAG00000002780	0.860904	0.0258	LOC100544972	ADAMTS-like protein 2	10	protein_coding
Up	ENSMGAG00000019601	0.857695	0.0411	ATG9B	autophagy-related protein 9A-like [Source:NCBI gene;Acc:107055991] ortholog	ADDD02143404.1	protein_coding
Up	ENSMGAG00000019496	0.854806	0.00172	ENSMGAG00000019496	novel protein coding gene	ADDD02159858.1	protein_coding
Up	ENSMGAG00000022645	0.854273	0.0309	ENSMGAG00000022645	KIAA1614 [Source:NCBI gene;Acc:424414] ortholog	10	protein_coding
Up	ENSMGAG00000016906	0.852259	0.039	ENSMGAG00000016906	Uncharacterized protein	KN388922.1	protein_coding
Up	ENSMGAG00000001652	0.851674	0.0347	NGEF	neuronal guanine nucleotide exchange factor [Source:HGNC Symbol;Acc:HGNC:7807]	11	protein_coding
Up	ENSMGAG00000004921	0.850229	0.0229	VGLL4	vestigial like family member 4 [Source:HGNC Symbol;Acc:HGNC:28966]	14	protein_coding
Up	ENSMGAG00000002600	0.850085	0.0156	THY1	Thy-1 cell surface antigen [Source:HGNC Symbol;Acc:HGNC:11801]	26	protein_coding
Up	ENSMGAG00000001477	0.845949	0.00419	ASAP3	ArfGAP with SH3 domain, ankyrin repeat and PH domain 3	25	protein_coding
Up	ENSMGAG00000020890	0.84512	0.00377	ENSMGAG00000020890	novel protein coding gene	KN388306.1	protein_coding
Up	ENSMGAG00000018195	0.84333	0.0178	ENSMGAG00000018195	lncRNA	ADDD02254976.1	lncRNA
Up	ENSMGAG00000008621	0.840253	0.04	INO80D	INO80 complex subunit D [Source:HGNC Symbol;Acc:HGNC:25997]	7	protein_coding
Up	ENSMGAG00000012870	0.838665	0.0157	TMEM181	transmembrane protein 181 [Source:HGNC Symbol;Acc:HGNC:20958]	2	protein_coding
Up	ENSMGAG00000015714	0.837926	0.00309	PHETA2	PH domain containing endocytic trafficking adaptor 2 [Source:HGNC Symbol;Acc:HGNC:27161]	1	protein_coding
Up	ENSMGAG00000020838	0.837671	0.0194	ENSMGAG00000020838	lncRNA	27	lncRNA
Up	ENSMGAG00000020069	0.833911	0.0492	ENSMGAG00000020069	novel protein coding gene	ADDD02254880.1	protein_coding
Up	ENSMGAG00000012684	0.829796	0.0427	LTBP2	latent transforming growth factor beta binding protein 2 [Source:HGNC Symbol;Acc:HGNC:6715]	5	protein_coding
Up	ENSMGAG00000001976	0.829644	0.0359	ZBTB37	zinc finger and BTB domain containing 37	10	protein_coding
Up	ENSMGAG00000002970	0.825151	0.0365	PIK3R6	phosphoinositide-3-kinase regulatory subunit 6 [Source:HGNC Symbol;Acc:HGNC:27101]	20	protein_coding
Up	ENSMGAG00000018070	0.82493	0.0259	ENSMGAG00000018070	novel protein coding gene	20	protein_coding
Up	ENSMGAG00000006695	0.823514	0.0307	PDE3B	phosphodiesterase 3B	5	protein_coding
Up	ENSMGAG00000022912	0.818923	0.0266	ENSMGAG00000022912	novel protein coding gene	KN389459.1	protein_coding
Up	ENSMGAG00000006782	0.818793	0.0117	CELSR3	cadherin EGF LAG seven-pass G-type receptor 3 [Source:HGNC Symbol;Acc:HGNC:3230]	14	protein_coding
Up	ENSMGAG00000010240	0.814782	0.000607	SEMA4G	semaphorin 4G [Source:HGNC Symbol;Acc:HGNC:10735]	8	protein_coding
Up	ENSMGAG00000022784	0.814274	0.0139	ENSMGAG00000022784	pseudogene	KN387458.1	pseudogene
Up	ENSMGAG00000003134	0.813754	0.0022	PPARGC1B	PPARG coactivator 1 beta	15	protein_coding
Up	ENSMGAG00000016041	0.813338	0.00904	ENSMGAG00000016041	ATP-grasp domain-containing protein	KN389200.1	protein_coding
Up	ENSMGAG00000003669	0.809558	0.000611	PBX1	PBX homeobox 1	10	protein_coding
Up	ENSMGAG00000000964	0.808896	0.00148	STAB1	stabilin 1 [Source:HGNC Symbol;Acc:HGNC:18628]	14	protein_coding
Up	ENSMGAG00000010210	0.807027	0.000272	GLCE	glucuronic acid epimerase [Source:HGNC Symbol;Acc:HGNC:17855]	12	protein_coding
Up	ENSMGAG00000021044	0.804478	0.0135	ENSMGAG00000021044	novel protein coding gene	1	protein_coding
Up	ENSMGAG00000002549	0.804029	0.0499	GJC2	gap junction protein gamma 2 [Source:HGNC Symbol;Acc:HGNC:17494]	6	protein_coding
Up	ENSMGAG00000018338	0.80374	0.0363	BHLHE40	basic helix-loop-helix family member e40 [Source:HGNC Symbol;Acc:HGNC:1046]	14	protein_coding
Up	ENSMGAG00000009910	0.803482	0.033	CNTN4	contactin 4 [Source:HGNC Symbol;Acc:HGNC:2174]	14	protein_coding
Up	ENSMGAG00000004210	0.802663	0.0363	ENSMGAG00000004210	Uncharacterized protein	20	protein_coding
Up	ENSMGAG00000014910	0.801756	0.0317	LOC100543552	multidrug resistance-associated protein 4	1	protein_coding
Up	ENSMGAG00000011415	0.801344	0.00696	SORBS2	sorbin and SH3 domain containing 2 [Source:HGNC Symbol;Acc:HGNC:24098]	4	protein_coding
Up	ENSMGAG00000020972	0.796656	0.000486	ENSMGAG00000020972	novel protein coding gene	KN389300.1	protein_coding
Up	ENSMGAG00000005984	0.796303	0.0307	KCTD15	potassium channel tetramerization domain containing 15	13	protein_coding
Up	ENSMGAG00000020244	0.7962	0.00247	RAB29	RAB29, member RAS oncogene family	28	protein_coding
Up	ENSMGAG00000022437	0.795304	0.0293	ENSMGAG00000022437	novel protein coding gene	2	protein_coding
Up	ENSMGAG00000003584	0.794867	0.00211	SNED1	sushi, nidogen and EGF like domains 1	11	protein_coding
Up	ENSMGAG00000006696	0.794683	0.00104	ZBTB40	zinc finger and BTB domain containing 40 [Source:HGNC Symbol;Acc:HGNC:29045]	23	protein_coding
Up	ENSMGAG00000017375	0.793373	0.0388	ENSMGAG00000017375	TAFH domain-containing protein	13	protein_coding
Up	ENSMGAG00000018708	0.792684	0.0153	LOC104913124	acylamino-acid-releasing enzyme-like [ Meleagris gallopavo (turkey) ]	14	protein_coding
Up	ENSMGAG00000001336	0.790384	0.00966	ENSMGAG00000001336	pseudogene	23	pseudogene
Up	ENSMGAG00000018775	0.787931	0.0359	ENSMGAG00000018775	novel protein coding gene	1	protein_coding
Up	ENSMGAG00000014593	0.786091	0.0123	AGPAT3	1-acylglycerol-3-phosphate O-acyltransferase 3	1	protein_coding
Up	ENSMGAG00000020360	0.78519	0.0254	ENSMGAG00000020360	novel protein coding gene	Z	protein_coding
Up	ENSMGAG00000009687	0.785048	0.0073	SLC38A1	solute carrier family 38 member 1	1	protein_coding
Up	ENSMGAG00000003262	0.782786	0.0135	UBXN7	UBX domain protein 7	11	protein_coding
Up	ENSMGAG00000008984	0.777577	0.00369	MDFIC	MyoD family inhibitor domain containing [Source:HGNC Symbol;Acc:HGNC:28870]	1	protein_coding
Up	ENSMGAG00000004433	0.773083	0.0187	TMEM161A	transmembrane protein 161A [Source:HGNC Symbol;Acc:HGNC:26020]	30	protein_coding
Up	ENSMGAG00000018930	0.771294	0.0329	ENSMGAG00000018930	novel protein coding gene	ADDD02100212.1	protein_coding
Up	ENSMGAG00000005973	0.770846	0.0145	KIRREL	kin of IRRE like (Drosophila)	27	protein_coding
Up	ENSMGAG00000011823	0.768418	0.02	NID1	nidogen 1 [Source:HGNC Symbol;Acc:HGNC:7821]	2	protein_coding
Up	ENSMGAG00000006598	0.767922	0.024	SGSM1	small G protein signaling modulator 1	17	protein_coding
Up	ENSMGAG00000004772	0.767833	0.0436	ENSMGAG00000004772	VIT domain-containing protein	26	protein_coding
Up	ENSMGAG00000009124	0.765721	0.0261	LOC100546403	malignant fibrous histiocytoma-amplified sequence 1 homolog	5	protein_coding
Up	ENSMGAG00000002399	0.763681	0.00664	EPHB1	EPH receptor B1	11	protein_coding
Up	ENSMGAG00000021006	0.760115	0.00905	ENSMGAG00000021006	novel protein coding gene	8	protein_coding
Up	ENSMGAG00000012577	0.758805	0.032	SASH1	SAM and SH3 domain containing 1 [Source:HGNC Symbol;Acc:HGNC:19182]	2	protein_coding
Up	ENSMGAG00000003028	0.758136	0.023	ATXN1	ataxin 1 [Source:HGNC Symbol;Acc:HGNC:10548]	3	protein_coding
Up	ENSMGAG00000018284	0.758053	0.0269	LOC104917086	myoferlin-like	KN389314.1	protein_coding
Up	ENSMGAG00000013213	0.757246	0.027	syne3	spectrin repeat containing nuclear envelope family member 3	5	protein_coding
Up	ENSMGAG00000016169	0.753237	0.00994	ZBTB21	zinc finger and BTB domain containing 21	1	protein_coding
Up	ENSMGAG00000000663	0.752292	0.00969	OTUD7B	OTU deubiquitinase 7B	27	protein_coding
Up	ENSMGAG00000018054	0.751046	3.26e-05	LOC100544425	zinc finger protein 383-like	KN389454.1	protein_coding
Up	ENSMGAG00000015872	0.746318	0.0272	LRATD2	LRAT domain containing 2 [Source:HGNC Symbol;Acc:HGNC:24166]	3	protein_coding
Up	ENSMGAG00000002555	0.74626	0.0429	FAM110D	family with sequence similarity 110 member D	25	protein_coding
Up	ENSMGAG00000001967	0.746204	0.00629	COL18A1	collagen type XVIII alpha 1 chain	7	pseudogene
Up	ENSMGAG00000002276	0.746116	0.00028	CBFA2T2	CBFA2/RUNX1 partner transcriptional co-repressor 2	22	protein_coding
Up	ENSMGAG00000015659	0.746077	0.0378	PAQR8	progestin and adipoQ receptor family member 8 [Source:HGNC Symbol;Acc:HGNC:15708]	2	protein_coding
Up	ENSMGAG00000007841	0.746052	0.0118	MYO19	myosin XIX	21	protein_coding
Up	ENSMGAG00000010467	0.743251	0.00962	LOXL3	lysyl oxidase like 3 [Source:HGNC Symbol;Acc:HGNC:13869]	5	protein_coding
Up	ENSMGAG00000019801	0.742065	0.00428	BAZ1B	bromodomain adjacent to zinc finger domain 1B [Source:NCBI gene;Acc:427819] ortholog	21	protein_coding
Up	ENSMGAG00000010198	0.741144	0.0125	PTCH2	patched 2 [Source:HGNC Symbol;Acc:HGNC:9586]	10	protein_coding
Up	ENSMGAG00000019520	0.740541	0.0196	ENSMGAG00000019520	novel protein coding gene	25	protein_coding
Up	ENSMGAG00000000716	0.739399	0.0212	ARHGEF10L	Rho guanine nucleotide exchange factor 10 like [Source:HGNC Symbol;Acc:HGNC:25540]	23	protein_coding
Up	ENSMGAG00000022481	0.734288	0.00236	Zfp41	zinc finger protein 41 [Source:MGI Symbol;Acc:MGI:99186] ortholog	KN387491.1	protein_coding
Up	ENSMGAG00000018635	0.731919	0.0255	ENSMGAG00000018635	novel protein coding gene	21	protein_coding
Up	ENSMGAG00000017796	0.727747	0.00839	ORAI2	Protein orai-2	21	protein_coding
Up	ENSMGAG00000010484	0.723517	0.0193	SEMA4B	semaphorin 4B [Source:HGNC Symbol;Acc:HGNC:10730]	12	protein_coding
Up	ENSMGAG00000020386	0.719908	0.0212	ENSMGAG00000020386	novel protein coding gene	ADDD02274365.1	protein_coding
Up	ENSMGAG00000001719	0.718164	0.0386	COL6A2	collagen type VI alpha 2 chain [Source:HGNC Symbol;Acc:HGNC:2212]	7	protein_coding
Up	ENSMGAG00000012794	0.71696	0.0248	GPATCH2L	G-patch domain containing 2 like [Source:HGNC Symbol;Acc:HGNC:20210]	5	protein_coding
Up	ENSMGAG00000020067	0.715316	0.00253	BAIAP2	BAI1 associated protein 2 [Source:NCBI gene;Acc:422077] ortholog	20	protein_coding
Up	ENSMGAG00000011894	0.713601	0.0279	ZFP36L1	ZFP36 ring finger protein like 1 [Source:HGNC Symbol;Acc:HGNC:1107]	5	protein_coding
Up	ENSMGAG00000002720	0.713417	0.00741	NFIC	Nuclear factor I C	KN389233.1	protein_coding
Up	ENSMGAG00000014681	0.713345	0.00937	NHS	NHS actin remodeling regulator	1	protein_coding
Up	ENSMGAG00000006029	0.713052	0.0332	ZDHHC15	zinc finger DHHC-type palmitoyltransferase 15 [Source:HGNC Symbol;Acc:HGNC:20342]	9	protein_coding
Up	ENSMGAG00000004240	0.71218	0.0152	NSD1	nuclear receptor binding SET domain protein 1 [Source:HGNC Symbol;Acc:HGNC:14234]	15	protein_coding
Up	ENSMGAG00000005138	0.711162	0.00187	FAM83G	family with sequence similarity 83 member G [Source:HGNC Symbol;Acc:HGNC:32554]	16	protein_coding
Up	ENSMGAG00000006939	0.710209	0.0125	ENSMGAG00000006939	pseudogene	ADDD02078708.1	pseudogene
Up	ENSMGAG00000001163	0.709457	0.0256	ENSMGAG00000001163	KRAB domain-containing protein	6	protein_coding
Up	ENSMGAG00000015784	0.708872	0.0346	ZBTB34	zinc finger and BTB domain containing 34 [Source:HGNC Symbol;Acc:HGNC:31446]	19	protein_coding
Up	ENSMGAG00000009782	0.708207	0.00309	ENSMGAG00000009782	Uncharacterized protein	28	protein_coding
Up	ENSMGAG00000005294	0.706546	0.00397	IQSEC1	IQ motif and Sec7 domain ArfGEF 1 [Source:HGNC Symbol;Acc:HGNC:29112]	14	protein_coding
Up	ENSMGAG00000004998	0.70506	0.0395	C8H10orf54	V-set immunoregulatory receptor	8	protein_coding
Up	ENSMGAG00000019241	0.701155	0.0368	ENSMGAG00000019241	novel protein coding gene	ADDD02252408.1	protein_coding
Up	ENSMGAG00000019150	0.700075	0.0109	ENSMGAG00000019150	novel protein coding gene	16	protein_coding
Up	ENSMGAG00000011088	0.697832	0.00651	CRY2	cryptochrome circadian regulator 2	5	protein_coding
Up	ENSMGAG00000021869	0.697277	0.000578	ENSMGAG00000021869	novel protein coding gene	ADDD02159201.1	protein_coding
Up	ENSMGAG00000001315	0.697086	0.0329	TNFRSF25	TNF receptor superfamily member 25 [Source:HGNC Symbol;Acc:HGNC:11910]	23	protein_coding
Up	ENSMGAG00000011229	0.691912	0.0402	MYBL1	MYB proto-oncogene like 1	3	protein_coding
Up	ENSMGAG00000013850	0.691827	0.0467	LRP6	LDL receptor related protein 6 [Source:HGNC Symbol;Acc:HGNC:6698]	1	protein_coding
Up	ENSMGAG00000002805	0.691232	0.0088	ARID3B	AT-rich interaction domain 3B [Source:HGNC Symbol;Acc:HGNC:14350]	12	protein_coding
Up	ENSMGAG00000004003	0.689596	0.00928	GAS2L2	growth arrest specific 2 like 2	21	protein_coding
Up	ENSMGAG00000000850	0.687413	0.0436	LOC100539172	butyrophilin subfamily 1 member A1-like	30	protein_coding
Up	ENSMGAG00000013026	0.686923	0.00724	FOXN3	forkhead box N3 [Source:HGNC Symbol;Acc:HGNC:1928]	5	protein_coding
Up	ENSMGAG00000003375	0.684452	0.00397	AGRN	agrin	23	protein_coding
Up	ENSMGAG00000013569	0.679519	0.0492	SIX4	SIX homeobox 4 [Source:HGNC Symbol;Acc:HGNC:10890]	5	protein_coding
Up	ENSMGAG00000011652	0.678413	0.00692	MIDEAS	mitotic deacetylase associated SANT domain protein [Source:HGNC Symbol;Acc:HGNC:19853]	5	protein_coding
Up	ENSMGAG00000019523	0.676055	0.0468	NR6A1	nuclear receptor subfamily 6 group A member 1 [Source:HGNC Symbol;Acc:HGNC:7985]	19	protein_coding
Up	ENSMGAG00000011703	0.67567	0.0193	CTBP2	C-terminal binding protein 2	8	protein_coding
Up	ENSMGAG00000004177	0.675213	0.0301	RHBDF2	rhomboid 5 homolog 2 [Source:HGNC Symbol;Acc:HGNC:20788]	20	protein_coding
Up	ENSMGAG00000014086	0.673719	0.00839	ASXL2	ASXL transcriptional regulator 2 [Source:HGNC Symbol;Acc:HGNC:23805]	2	protein_coding
Up	ENSMGAG00000003541	0.67297	0.0145	ABCB9	ATP binding cassette subfamily B member 9 [Source:HGNC Symbol;Acc:HGNC:50]	17	protein_coding
Up	ENSMGAG00000009991	0.671519	0.0143	TBC1D24	TBC1 domain family member 24	16	protein_coding
Up	ENSMGAG00000005493	0.671485	0.0326	TEAD1	TEA domain transcription factor 1	5	protein_coding
Up	ENSMGAG00000010565	0.671424	0.0123	PRDM11	PR/SET domain 11	5	protein_coding
Up	ENSMGAG00000005032	0.66669	0.00183	UNC5B	unc-5 netrin receptor B [Source:HGNC Symbol;Acc:HGNC:12568]	8	protein_coding
Up	ENSMGAG00000018581	0.665816	0.0369	ENSMGAG00000018581	novel protein coding gene	30	protein_coding
Up	ENSMGAG00000017621	0.665708	0.0124	ENSMGAG00000017621	small nuclear ribonucleoprotein U5 subunit 200 [Source:HGNC Symbol;Acc:HGNC:30859] ortholog	10	protein_coding
Up	ENSMGAG00000008945	0.663811	0.00781	CASD1	CAS1 domain containing 1	6	protein_coding
Up	ENSMGAG00000014674	0.662713	0.0357	CDKL5	cyclin dependent kinase like 5	1	protein_coding
Up	ENSMGAG00000006672	0.662521	0.00198	ABCA5	ATP binding cassette subfamily A member 5	20	protein_coding
Up	ENSMGAG00000019785	0.662362	0.00966	LOC104913884	WD repeat-containing protein 81-like	21	protein_coding
Up	ENSMGAG00000004332	0.660969	0.00185	ENSMGAG00000004332	Chromo domain-containing protein	KN387046.1	protein_coding
Up	ENSMGAG00000006739	0.65401	0.00385	NCKIPSD	NCK interacting protein with SH3 domain [Source:HGNC Symbol;Acc:HGNC:15486]	14	protein_coding
Up	ENSMGAG00000020968	0.652248	0.00254	ENSMGAG00000020968	novel protein coding gene	ADDD02177358.1	protein_coding
Up	ENSMGAG00000008624	0.651887	0.0362	NFAT5	nuclear factor of activated T cells 5	13	protein_coding
Up	ENSMGAG00000017155	0.651631	0.0485	ENSMGAG00000017155	ASD2 domain-containing protein	9	protein_coding
Up	ENSMGAG00000004413	0.651514	0.000486	PLEKHG3	Pleckstrin homology and RhoGEF domain containing G3	5	protein_coding
Up	ENSMGAG00000022011	0.650105	0.0133	ENSMGAG00000022011	novel protein coding gene	ADDD02071667.1	protein_coding
Up	ENSMGAG00000016513	0.64878	0.000895	NCOR2	nuclear receptor corepressor 2 [Source:HGNC Symbol;Acc:HGNC:7673]	17	protein_coding
Up	ENSMGAG00000012613	0.647722	0.026	ENTPD5	ectonucleoside triphosphate diphosphohydrolase 5 (inactive) [Source:HGNC Symbol;Acc:HGNC:3367]	5	protein_coding
Up	ENSMGAG00000003659	0.64708	0.0297	TMPRSS13	transmembrane serine protease 13 [Source:HGNC Symbol;Acc:HGNC:29808]	26	protein_coding
Up	ENSMGAG00000021420	0.646609	0.0419	ENSMGAG00000021420	novel protein coding gene	16	protein_coding
Up	ENSMGAG00000017694	0.643906	0.0488	DST	dystonin [Source:NCBI gene;Acc:421884] ortholog	2	protein_coding
Up	ENSMGAG00000012464	0.64353	0.0232	TRPS1	transcriptional repressor GATA binding 1 [Source:HGNC Symbol;Acc:HGNC:12340]	3	protein_coding
Up	ENSMGAG00000015345	0.641569	0.00849	LOC100545121	torsin-1A-interacting protein 2-like	10	protein_coding
Up	ENSMGAG00000019721	0.641495	0.0251	ENSMGAG00000019721	novel protein coding gene	1	protein_coding
Up	ENSMGAG00000022115	0.639692	0.0273	SYNGR1	synaptogyrin 1 [Source:HGNC Symbol;Acc:HGNC:11498]	1	protein_coding
Up	ENSMGAG00000005324	0.63886	0.0227	NUP210	nucleoporin 210 [Source:HGNC Symbol;Acc:HGNC:30052]	14	protein_coding
Up	ENSMGAG00000018916	0.637715	0.00307	LOC100544459	SLIT-ROBO Rho GTPase-activating protein 3 [ Meleagris gallopavo (turkey) ]	14	protein_coding
Up	ENSMGAG00000004755	0.637001	0.0114	LLGL1	LLGL scribble cell polarity complex component 1 [Source:HGNC Symbol;Acc:HGNC:6628]	16	protein_coding
Up	ENSMGAG00000019695	0.63486	0.0267	ENSMGAG00000019695	novel protein coding gene	15	protein_coding
Up	ENSMGAG00000019551	0.632623	0.0389	ENSMGAG00000019551	novel protein coding gene	13	protein_coding
Up	ENSMGAG00000003090	0.631171	0.0146	SLC41A1	solute carrier family 41 member 1	28	protein_coding
Up	ENSMGAG00000002650	0.629986	0.0225	PLEKHA6	pleckstrin homology domain containing A6 [Source:HGNC Symbol;Acc:HGNC:17053]	28	protein_coding
Up	ENSMGAG00000022650	0.62939	0.038	ENSMGAG00000022650	novel protein coding gene	ADDD02074670.1	protein_coding
Up	ENSMGAG00000010444	0.628954	0.0343	FES	FES proto-oncogene, tyrosine kinase	12	protein_coding
Up	ENSMGAG00000000724	0.628694	0.00443	LOC100539940	pumilio homolog 1	25	protein_coding
Up	ENSMGAG00000002138	0.628349	0.00287	HDAC4	histone deacetylase 4 [Source:HGNC Symbol;Acc:HGNC:14063]	7	protein_coding
Up	ENSMGAG00000010658	0.628248	0.0105	LOC100538692	inositol hexakisphosphate and diphosphoinositol-pentakisphosphate kinase 1-like	12	protein_coding
Up	ENSMGAG00000019595	0.627913	0.0135	ENSMGAG00000019595	novel protein coding gene	ADDD02178146.1	protein_coding
Up	ENSMGAG00000002011	0.627252	0.0236	SORL1	sortilin related receptor 1 [Source:HGNC Symbol;Acc:HGNC:11185]	26	protein_coding
Up	ENSMGAG00000008821	0.626603	0.0272	ABI2	abl interactor 2 [Source:HGNC Symbol;Acc:HGNC:24011]	7	protein_coding
Up	ENSMGAG00000001948	0.623725	0.0105	ENSMGAG00000001948	pseudogene	15	pseudogene
Up	ENSMGAG00000001428	0.623234	0.0102	GLG1	golgi glycoprotein 1	13	protein_coding
Up	ENSMGAG00000018348	0.623208	0.0451	LOC100546578	zinc finger protein castor homolog 1-like [ Meleagris gallopavo (turkey) ]	23	protein_coding
Up	ENSMGAG00000001757	0.618831	0.0313	TMEM144	transmembrane protein 144 [Source:HGNC Symbol;Acc:HGNC:25633]	4	protein_coding
Up	ENSMGAG00000010156	0.617215	0.0448	MAPK8IP3	mitogen-activated protein kinase 8 interacting protein 3	16	protein_coding
Up	ENSMGAG00000010247	0.617055	0.00966	B4GALT5	beta-1,4-galactosyltransferase 5	22	protein_coding
Up	ENSMGAG00000021508	0.615841	0.0245	ENSMGAG00000021508	pseudogene	KN387273.1	pseudogene
Up	ENSMGAG00000002368	0.614604	0.0204	OSBPL7	oxysterol binding protein like 7 [Source:HGNC Symbol;Acc:HGNC:16387]	KN386713.1	protein_coding
Up	ENSMGAG00000005112	0.614143	0.0171	LOC104912780	thrombospondin type-1 domain-containing protein 4-like	12	protein_coding
Up	ENSMGAG00000004467	0.614127	0.0008	GATSL3	GATS protein like 3	17	protein_coding
Up	ENSMGAG00000022382	0.613967	0.034	ENSMGAG00000022382	novel protein coding gene	KN389219.1	protein_coding
Up	ENSMGAG00000010040	0.613642	0.0233	FNDC3B	fibronectin type III domain containing 3B [Source:HGNC Symbol;Acc:HGNC:24670]	11	protein_coding
Up	ENSMGAG00000001631	0.611361	0.0496	MTSS2	MTSS I-BAR domain containing 2	13	protein_coding
Up	ENSMGAG00000002588	0.610435	0.018	ENSMGAG00000002588	PHD-type domain-containing protein	29	protein_coding
Up	ENSMGAG00000001005	0.610061	0.0408	ARHGAP32	Rho GTPase activating protein 32 [Source:HGNC Symbol;Acc:HGNC:17399]	26	protein_coding
Up	ENSMGAG00000021435	0.609523	0.0485	DHX34	DExH-box helicase 34	KN387613.1	protein_coding
Up	ENSMGAG00000001229	0.608979	0.0354	ENSMGAG00000001229	Uncharacterized protein	9	protein_coding
Up	ENSMGAG00000001973	0.608627	0.00236	ULK1	unc-51 like autophagy activating kinase 1	17	protein_coding
Up	ENSMGAG00000004946	0.608504	0.00311	FRMD4A	FERM domain containing 4A [Source:HGNC Symbol;Acc:HGNC:25491]	1	protein_coding
Up	ENSMGAG00000006930	0.608353	0.00855	ZNF362	zinc finger protein 362	23	protein_coding
Up	ENSMGAG00000006251	0.60735	0.00109	BAIAP2	BAI1 associated protein 2	20	protein_coding
Up	ENSMGAG00000015908	0.607303	0.0193	SERTAD2	SERTA domain containing 2 [Source:HGNC Symbol;Acc:HGNC:30784]	2	protein_coding
Up	ENSMGAG00000006582	0.605348	0.0159	FLNB	filamin B [Source:HGNC Symbol;Acc:HGNC:3755]	14	protein_coding
Up	ENSMGAG00000008178	0.605008	0.0157	ENSMGAG00000008178	pseudogene	13	pseudogene
Up	ENSMGAG00000019928	0.603758	0.014	ENSMGAG00000019928	novel protein coding gene	25	protein_coding
Up	ENSMGAG00000017682	0.601882	0.031	LOC104913062	cadherin-1 [ Meleagris gallopavo (turkey) ]	13	protein_coding
Up	ENSMGAG00000002037	0.599936	0.0152	DOT1L	DOT1 like histone lysine methyltransferase	30	protein_coding
Up	ENSMGAG00000009445	0.599075	0.045	SETBP1	SET binding protein 1 [Source:HGNC Symbol;Acc:HGNC:15573]	Z	protein_coding
Up	ENSMGAG00000011680	0.59863	0.0339	KANK4	KN motif and ankyrin repeat domains 4 [Source:HGNC Symbol;Acc:HGNC:27263]	10	protein_coding
Up	ENSMGAG00000003772	0.598188	0.0223	ZNF827	zinc finger protein 827 [Source:HGNC Symbol;Acc:HGNC:27193]	4	protein_coding
Up	ENSMGAG00000018278	0.598119	0.00356	TRIM28	tripartite motif containing 28 [ Meleagris gallopavo (turkey) ]	KN389382.1	protein_coding
Up	ENSMGAG00000001505	0.597437	0.0311	COQ10A	coenzyme Q-binding protein COQ10 homolog A, mitochondrial	KN387955.1	protein_coding
Up	ENSMGAG00000015301	0.597323	0.0376	COA4	cytochrome c oxidase assembly factor 4 homolog [Source:HGNC Symbol;Acc:HGNC:24604]	1	protein_coding
Up	ENSMGAG00000006621	0.593361	0.00928	KMT2E	lysine methyltransferase 2E (inactive)	1	protein_coding
Up	ENSMGAG00000003029	0.592817	0.0439	TYK2	tyrosine kinase 2	18	protein_coding
Up	ENSMGAG00000019916	0.59178	0.0154	ENSMGAG00000019916	novel protein coding gene	KN388167.1	protein_coding
Up	ENSMGAG00000001109	0.591243	0.00998	ABCA2	ATP binding cassette subfamily A member 2	19	protein_coding
Up	ENSMGAG00000001946	0.589703	0.0281	FNIP2	folliculin interacting protein 2 [Source:HGNC Symbol;Acc:HGNC:29280]	4	protein_coding
Up	ENSMGAG00000009522	0.586812	0.00231	CASKIN2	CASK interacting protein 2 [Source:HGNC Symbol;Acc:HGNC:18200]	20	protein_coding
Down	ENSMGAG00000022493	-5.55767	0.00392	ENSMGAG00000022493	novel protein coding gene	ADDD02068112.1	protein_coding
Down	ENSMGAG00000008102	-5.10137	0.00994	LECT2	leukocyte cell derived chemotaxin 2	15	protein_coding
Down	ENSMGAG00000006756	-4.57961	0.00219	OLFM3	olfactomedin 3	10	protein_coding
Down	ENSMGAG00000002183	-4.5142	0.0113	TNR	tenascin R	10	protein_coding
Down	ENSMGAG00000021246	-4.38863	0.0462	ENSMGAG00000021246	lncRNA	26	lncRNA
Down	ENSMGAG00000010559	-3.56352	0.00211	LYZ	lysozyme [Source:HGNC Symbol;Acc:HGNC:6740]	1	protein_coding
Down	ENSMGAG00000020339	-3.41215	0.00236	ENSMGAG00000020339	novel protein coding gene	KN386516.1	protein_coding
Down	ENSMGAG00000009866	-3.20845	0.023	KCNH1	potassium voltage-gated channel subfamily H member 1	2	protein_coding
Down	ENSMGAG00000021375	-3.15512	0.0315	LOC100548864	transcription cofactor HES-6-like	11	protein_coding
Down	ENSMGAG00000019909	-2.89224	0.0446	BG1	BG-like antigen 1 [Source:NCBI gene;Acc:426940] ortholog	18	protein_coding
Down	ENSMGAG00000021080	-2.86385	0.0465	ENSMGAG00000021080	paramyosin-like	KN388295.1	protein_coding
Down	ENSMGAG00000012440	-2.61236	0.0415	SLC34A2	solute carrier family 34 member 2 [Source:HGNC Symbol;Acc:HGNC:11020]	4	protein_coding
Down	ENSMGAG00000006137	-2.60831	0.00214	MYO1H	myosin IH [Source:HGNC Symbol;Acc:HGNC:13879]	17	protein_coding
Down	ENSMGAG00000006845	-2.42475	0.047	TNFRSF6B	TNF receptor superfamily member 6b	22	protein_coding
Down	ENSMGAG00000004801	-2.15767	0.0432	LOC100543636	ovoinhibitor	15	protein_coding
Down	ENSMGAG00000010677	-2.06629	0.00684	TSPAN8	tetraspanin 8 [Source:HGNC Symbol;Acc:HGNC:11855]	1	protein_coding
Down	ENSMGAG00000022342	-2.02965	0.00218	GRP	gastrin releasing peptide	Z	protein_coding
Down	ENSMGAG00000019393	-1.86327	0.000933	ENSMGAG00000019393	novel protein coding gene	KN389614.1	protein_coding
Down	ENSMGAG00000015930	-1.71461	0.0421	PRSS35	serine protease 35 [Source:HGNC Symbol;Acc:HGNC:21387]	2	protein_coding
Down	ENSMGAG00000013966	-1.70324	0.0411	ALKAL2	ALK and LTK ligand 2 [Source:HGNC Symbol;Acc:HGNC:27683]	2	protein_coding
Down	ENSMGAG00000004813	-1.55305	0.0135	LOC100541469	ovomucoid	15	protein_coding
Down	ENSMGAG00000015259	-1.45472	0.0416	AQP11	aquaporin 11	1	protein_coding
Down	ENSMGAG00000015123	-1.41497	0.00697	SKA3	Spindle and kinetochore-associated protein 3	1	protein_coding
Down	ENSMGAG00000017899	-1.41454	0.0492	IQCM	IQ motif containing M [ Meleagris gallopavo (turkey) ]	4	protein_coding
Down	ENSMGAG00000009530	-1.3764	0.0317	CENPF	centromere protein F [Source:HGNC Symbol;Acc:HGNC:1857]	2	protein_coding
Down	ENSMGAG00000019837	-1.28564	0.00149	GCNT1	glucosaminyl (N-acetyl) transferase 1 [Source:HGNC Symbol;Acc:HGNC:4203]	Z	protein_coding
Down	ENSMGAG00000019330	-1.27117	0.0318	ENSMGAG00000019330	novel protein coding gene	ADDD02173724.1	protein_coding
Down	ENSMGAG00000004539	-1.23788	0.0187	BCO2	beta-carotene oxygenase 2 [Source:HGNC Symbol;Acc:HGNC:18503]	26	protein_coding
Down	ENSMGAG00000011598	-1.18775	0.000436	SNRPD1	small nuclear ribonucleoprotein D1 polypeptide	6	protein_coding
Down	ENSMGAG00000002304	-1.17187	0.037	RFWD2	COP1 E3 ubiquitin ligase	10	protein_coding
Down	ENSMGAG00000018619	-1.10885	0.0193	ENSMGAG00000018619	lncRNA	30	lncRNA
Down	ENSMGAG00000006527	-1.08038	0.0221	NCOR1	nuclear receptor corepressor 1	21	protein_coding
Down	ENSMGAG00000009977	-1.05243	0.0357	TESC	tescalcin	17	protein_coding
Down	ENSMGAG00000013432	-1.02793	0.0167	GTF3C6	general transcription factor IIIC subunit 6	2	protein_coding
Down	ENSMGAG00000019622	-1.0206	0.000371	ENSMGAG00000019622	novel protein coding gene	6	protein_coding
Down	ENSMGAG00000008349	-0.987426	0.04	FAS	Fas cell surface death receptor [Source:HGNC Symbol;Acc:HGNC:11920]	8	protein_coding
Down	ENSMGAG00000002356	-0.983838	0.0396	LOC100547885	UDP-glucuronosyltransferase 1-1-like	7	protein_coding
Down	ENSMGAG00000011954	-0.981882	0.00867	STARD3NL	STARD3 N-terminal like [Source:HGNC Symbol;Acc:HGNC:19169]	6	protein_coding
Down	ENSMGAG00000017509	-0.976043	0.00288	MRM2	mitochondrial rRNA methyltransferase 2 [Source:NCBI gene;Acc:416466] ortholog	16	protein_coding
Down	ENSMGAG00000017907	-0.975601	0.0113	C11orf97	chromosome 11 open reading frame 97 [Source:HGNC Symbol;Acc:HGNC:49544]	1	protein_coding
Down	ENSMGAG00000018694	-0.958322	0.0452	ACBD7	Acyl-CoA binding domain containing 7	6	protein_coding
Down	ENSMGAG00000001249	-0.955838	0.039	MND1	meiotic nuclear divisions 1 [Source:HGNC Symbol;Acc:HGNC:24839]	4	protein_coding
Down	ENSMGAG00000009673	-0.953239	0.033	HOXD12	homeobox D12	7	protein_coding
Down	ENSMGAG00000021059	-0.92957	0.00334	ENSMGAG00000021059	lncRNA	21	lncRNA
Down	ENSMGAG00000019655	-0.90815	0.000669	ENSMGAG00000019655	novel protein coding gene	16	protein_coding
Down	ENSMGAG00000020559	-0.904555	0.000169	ENSMGAG00000020559	lncRNA	5	lncRNA
Down	ENSMGAG00000019792	-0.894596	0.00037	ENSMGAG00000019792	lncRNA	3	lncRNA
Down	ENSMGAG00000015726	-0.891775	0.000131	PNRC2	proline rich nuclear receptor coactivator 2 [Source:NCBI gene;Acc:419688] ortholog	25	protein_coding
Down	ENSMGAG00000010547	-0.891518	0.0342	SMC4	structural maintenance of chromosomes 4 [Source:HGNC Symbol;Acc:HGNC:14013]	11	protein_coding
Down	ENSMGAG00000002597	-0.871031	0.00288	RPL34	ribosomal protein L34	4	protein_coding
Down	ENSMGAG00000017508	-0.866742	0.00141	ENSMGAG00000017508	lncRNA	21	lncRNA
Down	ENSMGAG00000011491	-0.866237	0.0188	TERF1	telomeric repeat binding factor 1	3	protein_coding
Down	ENSMGAG00000019160	-0.864322	0.00397	DYNLL1	dynein light chain LC8-type 1 [Source:HGNC Symbol;Acc:HGNC:15476]	17	protein_coding
Down	ENSMGAG00000010924	-0.862966	0.00925	F2	coagulation factor II, thrombin	5	protein_coding
Down	ENSMGAG00000007978	-0.842535	3.12e-06	MRPL23	mitochondrial ribosomal protein L23	5	protein_coding
Down	ENSMGAG00000005332	-0.841379	0.00637	UBE2T	ubiquitin conjugating enzyme E2 T	28	protein_coding
Down	ENSMGAG00000022699	-0.838832	0.0169	ENSMGAG00000022699	lncRNA	3	lncRNA
Down	ENSMGAG00000002777	-0.828316	0.0478	STMN1	stathmin 1	25	protein_coding
Down	ENSMGAG00000006278	-0.828129	0.042	NAE1	NEDD8 activating enzyme E1 subunit 1	13	protein_coding
Down	ENSMGAG00000001809	-0.816637	0.0438	CCDC47	coiled-coil domain containing 47 [Source:HGNC Symbol;Acc:HGNC:24856]	29	protein_coding
Down	ENSMGAG00000018872	-0.799904	0.0024	ndufaf2	NADH:ubiquinone oxidoreductase complex assembly factor 2	Z	protein_coding
Down	ENSMGAG00000017846	-0.798677	0.00161	ENSMGAG00000017846	novel protein coding gene	5	protein_coding
Down	ENSMGAG00000018125	-0.793964	0.0135	PACRG	PARK2 coregulated [Source:NCBI gene;Acc:421576] ortholog	2	protein_coding
Down	ENSMGAG00000006708	-0.773559	0.00869	DYNLRB2	dynein light chain roadblock-type 2 [Source:HGNC Symbol;Acc:HGNC:15467]	13	protein_coding
Down	ENSMGAG00000011864	-0.772789	0.0218	OSGIN2	oxidative stress induced growth inhibitor family member 2 [Source:HGNC Symbol;Acc:HGNC:1355]	3	protein_coding
Down	ENSMGAG00000007032	-0.768012	7.06e-06	PPCS	phosphopantothenoylcysteine synthetase	23	protein_coding
Down	ENSMGAG00000005736	-0.767724	0.0284	LOC100543078	aprataxin-like	Z	protein_coding
Down	ENSMGAG00000002064	-0.767285	0.00104	CFAP36	Cilia- and flagella-associated protein 36 (Coiled-coil domain-containing protein 104)	2	protein_coding
Down	ENSMGAG00000009263	-0.763357	4.36e-06	PFDN4	prefoldin subunit 4	22	protein_coding
Down	ENSMGAG00000011005	-0.757657	0.026	NKIRAS1	NFKB inhibitor interacting Ras like 1 [Source:HGNC Symbol;Acc:HGNC:17899]	6	protein_coding
Down	ENSMGAG00000008808	-0.75476	0.000846	LSM8	LSM8 homolog, U6 small nuclear RNA associated [Source:HGNC Symbol;Acc:HGNC:20471]	1	protein_coding
Down	ENSMGAG00000020769	-0.750984	0.000895	LOC104910076	little elongation complex subunit 1-like	3	protein_coding
Down	ENSMGAG00000006936	-0.74977	0.0114	SDR42E1	short chain dehydrogenase/reductase family 42E, member 1 [Source:HGNC Symbol;Acc:HGNC:29834]	13	protein_coding
Down	ENSMGAG00000010101	-0.745785	0.0166	ENSMGAG00000010101	Uncharacterized protein	1	protein_coding
Down	ENSMGAG00000015105	-0.744671	0.00074	RPL21	ribosomal protein L21	1	protein_coding
Down	ENSMGAG00000008090	-0.741424	0.000883	RPL5	ribosomal protein L5	10	protein_coding
Down	ENSMGAG00000005322	-0.740472	0.00128	POLR1D	DNA-directed RNA polymerase I subunit D (DNA-directed RNA polymerases I and III subunit RPAC2)	9	protein_coding
Down	ENSMGAG00000012271	-0.739409	0.00928	CEP70	centrosomal protein 70	7	protein_coding
Down	ENSMGAG00000022069	-0.734973	0.00313	LOC104910859	G protein-coupled receptor kinase 4-like [ Meleagris gallopavo (turkey) ]	4	protein_coding
Down	ENSMGAG00000004957	-0.731037	0.0042	LOC100549070	non-canonical poly (A) RNA polymerase PAPD5-like	13	protein_coding
Down	ENSMGAG00000018645	-0.729697	0.0492	ENSMGAG00000018645	novel protein coding gene	2	protein_coding
Down	ENSMGAG00000001628	-0.729486	0.00637	POC1A	POC1 centriolar protein A [Source:HGNC Symbol;Acc:HGNC:24488]	14	protein_coding
Down	ENSMGAG00000006262	-0.729016	0.013	ZSWIM7	zinc finger SWIM-type containing 7	21	protein_coding
Down	ENSMGAG00000022285	-0.724749	0.0175	ENSMGAG00000022285	novel protein coding gene	1	protein_coding
Down	ENSMGAG00000021742	-0.723217	0.0147	ENSMGAG00000021742	novel protein coding gene	1	protein_coding
Down	ENSMGAG00000005697	-0.721389	0.000513	RPS24	ribosomal protein S24 [Source:HGNC Symbol;Acc:HGNC:10411]	8	protein_coding
Down	ENSMGAG00000008706	-0.719367	0.0202	PSMG2	proteasome assembly chaperone 2	3	protein_coding
Down	ENSMGAG00000001764	-0.715207	0.00119	CCDC34	coiled-coil domain containing 34 [Source:HGNC Symbol;Acc:HGNC:25079]	5	protein_coding
Down	ENSMGAG00000016155	-0.707152	6.58e-05	ENSMGAG00000016155	Uncharacterized protein	1	protein_coding
Down	ENSMGAG00000002259	-0.706936	0.0202	LOC100541746	prolyl-tRNA synthetase associated domain-containing protein 1-like	2	protein_coding
Down	ENSMGAG00000012165	-0.704699	0.00369	RIDA	reactive intermediate imine deaminase A homolog [Source:HGNC Symbol;Acc:HGNC:16897]	3	protein_coding
Down	ENSMGAG00000021935	-0.701215	4.08e-05	TRAPPC4	trafficking protein particle complex 4 [Source:HGNC Symbol;Acc:HGNC:19943]	26	protein_coding
Down	ENSMGAG00000017700	-0.700451	0.0114	ZBTB41	zinc finger and BTB domain containing 41 [Source:NCBI gene;Acc:424353] ortholog	10	protein_coding
Down	ENSMGAG00000010290	-0.697415	0.000378	APIP	APAF1 interacting protein [Source:HGNC Symbol;Acc:HGNC:17581]	5	protein_coding
Down	ENSMGAG00000017599	-0.693945	0.0013	ENSMGAG00000017599	lncRNA	2	lncRNA
Down	ENSMGAG00000016928	-0.693422	0.000156	CETN3	centrin 3 [Source:HGNC Symbol;Acc:HGNC:1868]	Z	protein_coding
Down	ENSMGAG00000006857	-0.690363	0.00767	SAP30	Sin3A associated protein 30 [Source:HGNC Symbol;Acc:HGNC:10532]	4	protein_coding
Down	ENSMGAG00000017365	-0.689249	0.0238	PIGH	phosphatidylinositol glycan anchor biosynthesis class H [Source:HGNC Symbol;Acc:HGNC:8964]	5	protein_coding
Down	ENSMGAG00000001380	-0.688443	0.0142	LOC100548827	tubulin alpha-8 chain	28	protein_coding
Down	ENSMGAG00000007711	-0.688312	0.00372	RPS15A	ribosomal protein S15a	16	protein_coding
Down	ENSMGAG00000015236	-0.687997	0.00179	TMEM126A	transmembrane protein 126A	1	protein_coding
Down	ENSMGAG00000014578	-0.68249	0.0241	RSPH1	radial spoke head component 1 [Source:HGNC Symbol;Acc:HGNC:12371]	1	protein_coding
Down	ENSMGAG00000010915	-0.682142	0.000185	MRPS18A	mitochondrial ribosomal protein S18A	2	protein_coding
Down	ENSMGAG00000021620	-0.682076	7.85e-05	CHCHD1	coiled-coil-helix-coiled-coil-helix domain containing 1 [Source:HGNC Symbol;Acc:HGNC:23518]	8	protein_coding
Down	ENSMGAG00000013223	-0.676846	0.0438	LOC100545481	adenylate kinase 7	5	protein_coding
Down	ENSMGAG00000004079	-0.675497	0.032	ECI2	enoyl-CoA delta isomerase 2 [Source:HGNC Symbol;Acc:HGNC:14601]	3	protein_coding
Down	ENSMGAG00000004002	-0.674164	0.0346	LYRM4	LYR motif containing 4 [Source:HGNC Symbol;Acc:HGNC:21365]	3	protein_coding
Down	ENSMGAG00000021436	-0.673107	0.0149	LOC104912421	dedicator of cytokinesis protein 7-like	10	protein_coding
Down	ENSMGAG00000001956	-0.672093	0.0126	FAM83C	family with sequence similarity 83 member C [Source:HGNC Symbol;Acc:HGNC:16121]	22	protein_coding
Down	ENSMGAG00000021591	-0.671648	0.0339	CZH5orf63	chromosome Z C5orf63 homolog	Z	protein_coding
Down	ENSMGAG00000013355	-0.670244	0.0468	HSP90AA1	heat shock protein 90 alpha family class A member 1 [Source:HGNC Symbol;Acc:HGNC:5253]	5	protein_coding
Down	ENSMGAG00000020958	-0.668188	0.00128	MRPL47	mitochondrial ribosomal protein L47 [Source:HGNC Symbol;Acc:HGNC:16652]	11	protein_coding
Down	ENSMGAG00000017589	-0.667791	0.000161	ENSMGAG00000017589	lncRNA	1	lncRNA
Down	ENSMGAG00000008470	-0.667256	0.0133	VDAC1	voltage dependent anion channel 1	15	protein_coding
Down	ENSMGAG00000007745	-0.665281	0.00248	RPL39	ribosomal protein L39 [Source:HGNC Symbol;Acc:HGNC:10350]	9	protein_coding
Down	ENSMGAG00000012412	-0.664402	1.51e-05	EMC2	ER membrane protein complex subunit 2	3	protein_coding
Down	ENSMGAG00000012161	-0.659883	0.0105	C1orf131	chromosome 1 open reading frame 131 [Source:HGNC Symbol;Acc:HGNC:25332]	2	protein_coding
Down	ENSMGAG00000013154	-0.654383	6.69e-06	CHMP3	charged multivesicular body protein 3	4	protein_coding
Down	ENSMGAG00000010142	-0.653024	0.00397	RPS8	ribosomal protein S8	10	protein_coding
Down	ENSMGAG00000002827	-0.651546	9.64e-05	AURKAIP1	aurora kinase A interacting protein 1	23	protein_coding
Down	ENSMGAG00000011362	-0.650391	0.000933	DPY30	dpy-30 histone methyltransferase complex regulatory subunit	2	protein_coding
Down	ENSMGAG00000011207	-0.649977	1.02e-05	LOC100545797	cytochrome c oxidase assembly factor 7	10	protein_coding
Down	ENSMGAG00000007107	-0.649604	0.00189	HSPE1	heat shock protein family E (Hsp10) member 1 [Source:HGNC Symbol;Acc:HGNC:5269]	7	protein_coding
Down	ENSMGAG00000017499	-0.647826	0.0416	COX2	cytochrome c oxidase subunit II [Source:NCBI gene (formerly Entrezgene);Acc:5848004]	MT	protein_coding
Down	ENSMGAG00000009642	-0.646597	3.58e-06	SMCHD1	structural maintenance of chromosomes flexible hinge domain containing 1 [Source:HGNC Symbol;Acc:HGNC:29090]	3	protein_coding
Down	ENSMGAG00000021552	-0.644904	0.00658	ENSMGAG00000021552	lncRNA	2	lncRNA
Down	ENSMGAG00000021520	-0.643634	0.0133	ENSMGAG00000021520	novel protein coding gene	6	protein_coding
Down	ENSMGAG00000013978	-0.642737	0.00592	RPS7	ribosomal protein S7 [Source:NCBI gene (formerly Entrezgene);Acc:100546444]	2	protein_coding
Down	ENSMGAG00000007776	-0.639504	0.011	LSM3	LSM3 homolog, U6 small nuclear RNA and mRNA degradation associated [Source:HGNC Symbol;Acc:HGNC:17874]	14	protein_coding
Down	ENSMGAG00000017575	-0.638173	0.019	ENSMGAG00000017575	novel protein coding gene	6	protein_coding
Down	ENSMGAG00000011294	-0.63765	0.012	entpd3	ectonucleoside triphosphate diphosphohydrolase 3	6	protein_coding
Down	ENSMGAG00000005060	-0.63645	0.0364	COMMD1	copper metabolism domain containing 1 [Source:HGNC Symbol;Acc:HGNC:23024]	2	protein_coding
Down	ENSMGAG00000020201	-0.636437	0.000378	ENSMGAG00000020201	pseudogene	3	pseudogene
Down	ENSMGAG00000003517	-0.636171	0.000895	SMARCA5	SWI/SNF related, matrix associated, actin dependent regulator of chromatin, subfamily a, member 5 [Source:HGNC Symbol;Acc:HGNC:11101]	4	protein_coding
Down	ENSMGAG00000022897	-0.63493	0.00271	CINP	cyclin dependent kinase 2 interacting protein [Source:HGNC Symbol;Acc:HGNC:23789]	5	protein_coding
Down	ENSMGAG00000014989	-0.634285	0.0022	GTF2F2	general transcription factor IIF subunit 2	1	protein_coding
Down	ENSMGAG00000012160	-0.634182	0.00164	RPL30	ribosomal protein L30	3	protein_coding
Down	ENSMGAG00000000944	-0.634005	0.000145	EDF1	endothelial differentiation related factor 1 [Source:HGNC Symbol;Acc:HGNC:3164]	19	protein_coding
Down	ENSMGAG00000013035	-0.6332	0.0149	EEF1D	eukaryotic translation elongation factor 1 delta [Source:HGNC Symbol;Acc:HGNC:3211]	3	protein_coding
Down	ENSMGAG00000002147	-0.631551	8.69e-05	TMA16	translation machinery associated 16 homolog [Source:HGNC Symbol;Acc:HGNC:25638]	4	protein_coding
Down	ENSMGAG00000021120	-0.631254	0.0422	GLRX2	glutaredoxin 2 [ Meleagris gallopavo (turkey) ]	10	protein_coding
Down	ENSMGAG00000012834	-0.630681	0.0138	LRRC6	leucine rich repeat containing 6 [Source:HGNC Symbol;Acc:HGNC:16725]	3	protein_coding
Down	ENSMGAG00000005724	-0.63055	0.0481	FAAP24	FA core complex associated protein 24	13	protein_coding
Down	ENSMGAG00000007693	-0.630344	0.000169	NKAP	NFKB activating protein [Source:HGNC Symbol;Acc:HGNC:29873]	9	protein_coding
Down	ENSMGAG00000006150	-0.629822	0.0218	ASNSD1	asparagine synthetase domain containing 1	7	protein_coding
Down	ENSMGAG00000017583	-0.6274	0.0182	PTTG1	PTTG1 regulator of sister chromatid separation, securin	15	protein_coding
Down	ENSMGAG00000012320	-0.624662	0.0127	C7H2orf76	chromosome 7 open reading frame, human C2orf76	7	protein_coding
Down	ENSMGAG00000008677	-0.623381	0.0124	CAAP1	caspase activity and apoptosis inhibitor 1 [Source:HGNC Symbol;Acc:HGNC:25834]	Z	protein_coding
Down	ENSMGAG00000014038	-0.6224	0.0494	LAPTM4A	lysosomal protein transmembrane 4 alpha [Source:HGNC Symbol;Acc:HGNC:6924]	2	protein_coding
Down	ENSMGAG00000015734	-0.622077	0.000298	OCIAD1	OCIA domain containing 1	4	protein_coding
Down	ENSMGAG00000010296	-0.620559	0.0104	POLR1F	RNA polymerase I subunit F [Source:HGNC Symbol;Acc:HGNC:18027]	6	protein_coding
Down	ENSMGAG00000001177	-0.618485	0.000208	MRPL40	mitochondrial ribosomal protein L40	17	protein_coding
Down	ENSMGAG00000010373	-0.618473	4.81e-05	PPIG	peptidylprolyl isomerase G	7	protein_coding
Down	ENSMGAG00000019251	-0.617996	0.0441	ENSMGAG00000019251	novel protein coding gene	2	protein_coding
Down	ENSMGAG00000014396	-0.617913	0.00966	NECTIN3	nectin cell adhesion molecule 3	1	protein_coding
Down	ENSMGAG00000001929	-0.617225	0.0441	HSPA8	heat shock protein family A (Hsp70) member 8 [Source:HGNC Symbol;Acc:HGNC:5241]	26	protein_coding
Down	ENSMGAG00000003551	-0.61707	0.000197	ENSMGAG00000003551	NAC-A/B domain-containing protein	3	protein_coding
Down	ENSMGAG00000006513	-0.616908	0.00309	LYSMD2	LysM domain containing 2	12	protein_coding
Down	ENSMGAG00000007069	-0.616706	0.000765	CLTA	Clathrin light chain	Z	protein_coding
Down	ENSMGAG00000022049	-0.615131	0.00321	LSM6	LSM6 homolog, U6 small nuclear RNA and mRNA degradation associated [Source:HGNC Symbol;Acc:HGNC:17017]	4	protein_coding
Down	ENSMGAG00000019538	-0.614957	0.0342	TTC32	tetratricopeptide repeat domain 32 [Source:HGNC Symbol;Acc:HGNC:32954]	2	protein_coding
Down	ENSMGAG00000005079	-0.614223	4.51e-08	PPP1CC	protein phosphatase 1 catalytic subunit gamma [Source:HGNC Symbol;Acc:HGNC:9283]	17	protein_coding
Down	ENSMGAG00000011058	-0.613792	0.039	GAR1	GAR1 ribonucleoprotein [Source:HGNC Symbol;Acc:HGNC:14264]	4	protein_coding
Down	ENSMGAG00000001591	-0.613385	0.00372	NPM1	nucleophosmin	15	protein_coding
Down	ENSMGAG00000013996	-0.610729	0.00198	MIX23	mitochondrial matrix import factor 23 [Source:HGNC Symbol;Acc:HGNC:31136]	1	protein_coding
Down	ENSMGAG00000013736	-0.61058	0.0292	DMAC2L	distal membrane arm assembly complex 2 like [Source:HGNC Symbol;Acc:HGNC:18799]	5	protein_coding
Down	ENSMGAG00000019404	-0.60641	0.033	ENSMGAG00000019404	novel protein coding gene	15	protein_coding
Down	ENSMGAG00000022874	-0.60515	0.0229	ENSMGAG00000022874	novel protein coding gene	22	protein_coding
Down	ENSMGAG00000020689	-0.604263	0.00291	ENSMGAG00000020689	lncRNA	6	lncRNA
Down	ENSMGAG00000011338	-0.603823	0.0138	LRRC42	leucine rich repeat containing 42 [Source:HGNC Symbol;Acc:HGNC:28792]	10	protein_coding
Down	ENSMGAG00000022192	-0.603153	0.00174	MINOS1	mitochondrial inner membrane organizing system 1 [Source:NCBI gene;Acc:419474] ortholog	23	protein_coding
Down	ENSMGAG00000022687	-0.601819	0.00564	ENSMGAG00000022687	novel protein coding gene	10	protein_coding
Down	ENSMGAG00000010186	-0.599553	0.00361	RPL22L1	ribosomal protein L22 like 1 [Source:HGNC Symbol;Acc:HGNC:27610]	11	protein_coding
Down	ENSMGAG00000004482	-0.598704	0.00311	DFFA	DNA fragmentation factor subunit alpha	23	protein_coding
Down	ENSMGAG00000004167	-0.597411	0.0135	RPS25	ribosomal protein S25	26	protein_coding
Down	ENSMGAG00000013519	-0.59669	0.011	LOC104909858	reticulon-4-interacting protein 1, mitochondrial-like	2	protein_coding
Down	ENSMGAG00000006216	-0.595783	0.0079	GTF3C5	general transcription factor IIIC subunit 5 [Source:HGNC Symbol;Acc:HGNC:4668]	19	protein_coding
Down	ENSMGAG00000018457	-0.594602	0.00637	ENSMGAG00000018457	novel protein coding gene	Z	protein_coding
Down	ENSMGAG00000009712	-0.594311	0.0286	NENF	neudesin neurotrophic factor	2	protein_coding
Down	ENSMGAG00000011060	-0.592696	0.00192	RPS16	ribosomal protein S16	1	protein_coding
Down	ENSMGAG00000022475	-0.592344	0.0297	LOC104915564	zinc finger RNA-binding protein-like	KN386609.1	protein_coding
Down	ENSMGAG00000003038	-0.590763	5.32e-05	NUCKS1	nuclear casein kinase and cyclin dependent kinase substrate 1 [Source:HGNC Symbol;Acc:HGNC:29923]	28	protein_coding
Down	ENSMGAG00000012427	-0.589877	2.81e-05	EBAG9	estrogen receptor binding site associated antigen 9	3	protein_coding
Down	ENSMGAG00000013463	-0.587369	0.0376	ZBTB24	zinc finger and BTB domain containing 24	2	protein_coding
Down	ENSMGAG00000009756	-0.585373	0.0376	ACTL6A	actin like 6A [Source:HGNC Symbol;Acc:HGNC:24124]	11	protein_coding

## Sheet: Virgin_Sham_Early
Regulation	Ensembl ID	log2 Fold Change	Adj.Pval	Gene ID	Gene description	Chr	Type
Up	ENSMGAG00000011947	1.45856	0.0226	ARG2	arginase 2 [Source:HGNC Symbol;Acc:HGNC:664]	5	protein_coding
Up	ENSMGAG00000013676	1.06524	0.041	WDHD1	WD repeat and HMG-box DNA binding protein 1 [Source:HGNC Symbol;Acc:HGNC:23170]	5	protein_coding
Up	ENSMGAG00000009784	1.01858	0.0226	TYMS	thymidylate synthetase [Source:HGNC Symbol;Acc:HGNC:12441]	3	protein_coding
Up	ENSMGAG00000014393	0.850138	0.0494	HJURP	Holliday junction recognition protein	1	protein_coding
Up	ENSMGAG00000021283	0.7311	0.041	SELENOH	selenoprotein H [ Meleagris gallopavo (turkey) ]	5	protein_coding
Down	ENSMGAG00000008329	-16.5136	0.0168	SPAM1	sperm adhesion molecule 1 [Source:HGNC Symbol;Acc:HGNC:11217]	1	protein_coding
Down	ENSMGAG00000022374	-16.3963	0.00481	LOC104909332	deleted in malignant brain tumors 1 protein-like	8	protein_coding
Down	ENSMGAG00000017944	-3.41105	0.0296	ENSMGAG00000017944	lncRNA	22	lncRNA
Down	ENSMGAG00000001978	-2.58407	0.000519	LOC723980	avidin	Z	protein_coding
Down	ENSMGAG00000000770	-1.50209	0.000519	LOC100545080	lipocalin-like	19	protein_coding
Down	ENSMGAG00000017102	-1.47282	0.0217	ABCA7	ATP binding cassette subfamily A member 7	30	pseudogene
Down	ENSMGAG00000004300	-1.15032	0.00481	FRZB	frizzled related protein [Source:HGNC Symbol;Acc:HGNC:3959]	7	protein_coding
Down	ENSMGAG00000011815	-1.08389	0.0228	MGP	matrix Gla protein [Source:HGNC Symbol;Acc:HGNC:7060]	1	protein_coding

## Sheet: Sham_Early_Sham_Peak
Regulation	Ensembl ID	log2 Fold Change	Adj.Pval	Gene ID	Gene description	Chr	Type
Up	ENSMGAG00000022374	16.0873	5.58e-05	LOC104909332	deleted in malignant brain tumors 1 protein-like	8	protein_coding
Up	ENSMGAG00000003277	6.70689	1.65e-07	TTLL10	Tubulin tyrosine ligase like 10	23	protein_coding
Up	ENSMGAG00000019194	6.44726	1.45e-05	ENSMGAG00000019194	lncRNA	1	lncRNA
Up	ENSMGAG00000018406	6.268	3.49e-05	ENSMGAG00000018406	lncRNA	1	lncRNA
Up	ENSMGAG00000004783	6.19738	4.56e-05	ENSMGAG00000004783	Kazal-like domain-containing protein	15	protein_coding
Up	ENSMGAG00000007789	5.99604	4.42e-05	WNT8A	Protein Wnt	15	protein_coding
Up	ENSMGAG00000002297	5.65195	2.55e-06	SALL3	spalt like transcription factor 3 [Source:HGNC Symbol;Acc:HGNC:10527]	3	protein_coding
Up	ENSMGAG00000007268	5.53267	0.000208	SUSD2	sushi domain containing 2	17	protein_coding
Up	ENSMGAG00000021486	5.49587	0.0291	LOC100549006	olfactory receptor 14A16-like	4	protein_coding
Up	ENSMGAG00000007637	5.42813	1.05e-05	MASP1	mannan binding lectin serine peptidase 1 [Source:HGNC Symbol;Acc:HGNC:6901]	11	protein_coding
Up	ENSMGAG00000018892	5.20369	3.49e-06	ITPRID1	ITPR interacting domain containing 1 [Source:HGNC Symbol;Acc:HGNC:27363]	6	protein_coding
Up	ENSMGAG00000011942	5.05738	0.00566	LOC100544022	PGAP2-interacting protein-like	4	protein_coding
Up	ENSMGAG00000018727	4.83228	0.00209	ENSMGAG00000018727	novel protein coding gene	1	protein_coding
Up	ENSMGAG00000020178	4.70852	0.00283	ENSMGAG00000020178	family with sequence similarity 71, member D [Source:NCBI gene;Acc:423282] ortholog	5	protein_coding
Up	ENSMGAG00000001206	4.68283	0.0222	ENSMGAG00000001206	Uncharacterized protein	27	protein_coding
Up	ENSMGAG00000011103	4.67023	0.000125	PPFIA2	PTPRF interacting protein alpha 2	1	protein_coding
Up	ENSMGAG00000007144	4.6471	5.71e-05	CCKBR	cholecystokinin B receptor [Source:HGNC Symbol;Acc:HGNC:1571]	1	protein_coding
Up	ENSMGAG00000021659	4.63365	0.00585	ENSMGAG00000021659	collagen type IX alpha 1 chain [Source:NCBI gene;Acc:771873] ortholog	2	protein_coding
Up	ENSMGAG00000011222	4.6173	0.00519	OBSL1	Obscurin like cytoskeletal adaptor 1	7	protein_coding
Up	ENSMGAG00000011304	4.58553	5.53e-12	KERA	keratocan [Source:HGNC Symbol;Acc:HGNC:6309]	1	protein_coding
Up	ENSMGAG00000010778	4.55099	0.00361	ENSMGAG00000010778	Uncharacterized protein	KN389552.1	protein_coding
Up	ENSMGAG00000022451	4.53273	0.00438	ENSMGAG00000022451	lncRNA	KN389586.1	lncRNA
Up	ENSMGAG00000021453	4.48253	2.56e-05	ENSMGAG00000021453	novel protein coding gene	30	protein_coding
Up	ENSMGAG00000012993	4.45646	0.0381	LOC100541197	lymphocyte antigen 6E-like	3	protein_coding
Up	ENSMGAG00000007923	4.43683	0.00269	ENSMGAG00000007923	Uncharacterized protein	25	protein_coding
Up	ENSMGAG00000009342	4.39533	0.0216	SRL	sarcalumenin	16	protein_coding
Up	ENSMGAG00000022308	4.32314	0.00327	ENSMGAG00000022308	novel protein coding gene	ADDD02068878.1	protein_coding
Up	ENSMGAG00000019613	4.29651	0.00356	ENSMGAG00000019613	novel protein coding gene	15	protein_coding
Up	ENSMGAG00000014795	4.27325	0.000324	ENSMGAG00000014795	Uncharacterized protein	1	protein_coding
Up	ENSMGAG00000022939	4.2455	0.000391	LOC104916173	butyrophilin subfamily 2 member A1-like	KN387928.1	protein_coding
Up	ENSMGAG00000009612	4.24485	0.00237	PDE11A	phosphodiesterase 11A	7	protein_coding
Up	ENSMGAG00000017565	4.24395	0.00298	ENSMGAG00000017565	lncRNA	25	lncRNA
Up	ENSMGAG00000001340	4.22812	0.00922	BRINP3	BMP/retinoic acid inducible neural specific 3 [Source:HGNC Symbol;Acc:HGNC:22393]	10	protein_coding
Up	ENSMGAG00000015330	4.19105	0.000911	LOC100551216	interferon-induced protein with tetratricopeptide repeats 5-like	8	protein_coding
Up	ENSMGAG00000018616	4.1905	0.0402	ENSMGAG00000018616	lncRNA	1	lncRNA
Up	ENSMGAG00000018347	4.1739	0.028	ENSMGAG00000018347	lncRNA	1	lncRNA
Up	ENSMGAG00000019960	4.17389	0.00217	ENSMGAG00000019960	novel protein coding gene	ADDD02131727.1	protein_coding
Up	ENSMGAG00000022287	4.1335	1.45e-06	TMEM247	transmembrane protein 247	2	protein_coding
Up	ENSMGAG00000012227	4.13101	8.19e-07	FBXO43	F-box protein 43 [Source:HGNC Symbol;Acc:HGNC:28521]	3	protein_coding
Up	ENSMGAG00000019204	4.03391	1.07e-06	ENSMGAG00000019204	cytosolic phospholipase A2 epsilon-like	5	protein_coding
Up	ENSMGAG00000001427	4.0233	0.0181	OPCML	opioid binding protein/cell adhesion molecule like [Source:HGNC Symbol;Acc:HGNC:8143]	26	protein_coding
Up	ENSMGAG00000022381	4.01323	3.62e-10	ENSMGAG00000022381	pseudogene	KN387201.1	pseudogene
Up	ENSMGAG00000019796	4.00587	0.0125	PARPBP	PARP1 binding protein [Source:NCBI gene;Acc:418092] ortholog	1	protein_coding
Up	ENSMGAG00000018097	3.97979	0.000251	LOC104913141	2'-5'-oligoadenylate synthase-like protein 2 [ Meleagris gallopavo (turkey) ]	14	protein_coding
Up	ENSMGAG00000009108	3.94499	6.36e-07	CHAD	chondroadherin	20	protein_coding
Up	ENSMGAG00000019361	3.93119	0.0452	ENSMGAG00000019361	lncRNA	3	lncRNA
Up	ENSMGAG00000013389	3.88783	5.53e-05	TXLNB	taxilin beta	2	protein_coding
Up	ENSMGAG00000015621	3.88238	0.0456	GPR17	G protein-coupled receptor 17 [Source:HGNC Symbol;Acc:HGNC:4471]	11	protein_coding
Up	ENSMGAG00000009752	3.8185	0.0184	CHRNA1	cholinergic receptor nicotinic alpha 1 subunit	7	protein_coding
Up	ENSMGAG00000005106	3.80506	0.00225	NIPAL4	NIPA like domain containing 4 [Source:HGNC Symbol;Acc:HGNC:28018]	15	protein_coding
Up	ENSMGAG00000002114	3.76754	0.000151	KCTD19	Potassium channel tetramerization domain containing 19	13	protein_coding
Up	ENSMGAG00000021493	3.76322	0.0324	ENSMGAG00000021493	lncRNA	8	lncRNA
Up	ENSMGAG00000009621	3.76243	0.0266	LTB4R	leukotriene B4 receptor 1	18	protein_coding
Up	ENSMGAG00000010625	3.75524	0.0218	G6PC2	glucose-6-phosphatase catalytic subunit 2 [Source:HGNC Symbol;Acc:HGNC:28906]	7	protein_coding
Up	ENSMGAG00000006733	3.75313	0.00054	NEIL3	nei like DNA glycosylase 3	4	protein_coding
Up	ENSMGAG00000022694	3.75309	0.0344	ENSMGAG00000022694	novel protein coding gene	Z	protein_coding
Up	ENSMGAG00000018935	3.73017	0.00504	ENSMGAG00000018935	novel protein coding gene	ADDD02148584.1	protein_coding
Up	ENSMGAG00000015465	3.69737	0.00631	NYX	nyctalopin [Source:HGNC Symbol;Acc:HGNC:8082]	1	protein_coding
Up	ENSMGAG00000001941	3.66217	9.31e-12	MYL4	myosin light chain 4	29	protein_coding
Up	ENSMGAG00000013530	3.65447	6.89e-18	LOC100546539	aldose reductase-related protein 2-like	1	protein_coding
Up	ENSMGAG00000018692	3.65363	0.000175	LOC100539904	amine sulfotransferase-like [ Meleagris gallopavo (turkey) ]	2	protein_coding
Up	ENSMGAG00000017874	3.62985	1.92e-05	TTR	transthyretin-like [Source:NCBI gene;Acc:112531842] ortholog	3	protein_coding
Up	ENSMGAG00000003864	3.58957	1.52e-06	CDC20B	cell division cycle 20B [Source:HGNC Symbol;Acc:HGNC:24222]	Z	protein_coding
Up	ENSMGAG00000001632	3.57673	0.0252	GRIN1	glutamate ionotropic receptor NMDA type subunit 1	19	protein_coding
Up	ENSMGAG00000018996	3.55972	0.00342	ENSMGAG00000018996	novel protein coding gene	11	protein_coding
Up	ENSMGAG00000011891	3.51557	0.0326	GRIN2B	glutamate ionotropic receptor NMDA type subunit 2B [Source:HGNC Symbol;Acc:HGNC:4586]	1	protein_coding
Up	ENSMGAG00000017034	3.51068	0.000564	LOC104910574	E3 ISG15--protein ligase HERC5-like	4	protein_coding
Up	ENSMGAG00000001942	3.50821	0.00035	ENSMGAG00000001942	Uncharacterized protein	30	protein_coding
Up	ENSMGAG00000018220	3.48025	0.0451	ENSMGAG00000018220	lncRNA	1	lncRNA
Up	ENSMGAG00000011386	3.47355	2.59e-05	LOC100542475	cytosolic phospholipase A2 epsilon-like	5	protein_coding
Up	ENSMGAG00000011785	3.46873	0.000114	clrn3	clarin 3	8	protein_coding
Up	ENSMGAG00000014656	3.46131	0.0264	LOC100547461	metalloendopeptidase homolog PEX-like	1	protein_coding
Up	ENSMGAG00000018868	3.45532	0.00477	ENSMGAG00000018868	lncRNA	26	lncRNA
Up	ENSMGAG00000022519	3.43491	0.035	ENSMGAG00000022519	lncRNA	19	lncRNA
Up	ENSMGAG00000015062	3.37321	6.71e-08	CCNA1	Cyclin A1	1	protein_coding
Up	ENSMGAG00000012892	3.3704	6.96e-15	LOC100550697	carboxypeptidase Z-like	4	protein_coding
Up	ENSMGAG00000021673	3.34411	1.27e-23	ENSMGAG00000021673	novel protein coding gene	7	protein_coding
Up	ENSMGAG00000014828	3.33889	0.00846	SULT1C3	sulfotransferase family 1C member 3 [Source:HGNC Symbol;Acc:HGNC:33543]	1	protein_coding
Up	ENSMGAG00000017652	3.33542	0.00908	ENSMGAG00000017652	pseudogene	13	pseudogene
Up	ENSMGAG00000002837	3.32226	1.1e-06	BUB1	BUB1 mitotic checkpoint serine/threonine kinase	2	protein_coding
Up	ENSMGAG00000012007	3.31955	1.72e-09	ANLN	anillin actin binding protein [Source:HGNC Symbol;Acc:HGNC:14082]	6	protein_coding
Up	ENSMGAG00000018857	3.3133	3.41e-06	ENSMGAG00000018857	novel protein coding gene	12	protein_coding
Up	ENSMGAG00000006490	3.30827	1.15e-20	LOC100549696	peroxidasin homolog	22	protein_coding
Up	ENSMGAG00000000823	3.30063	0.00859	NRGN	neurogranin [Source:HGNC Symbol;Acc:HGNC:8000]	26	protein_coding
Up	ENSMGAG00000005391	3.27164	0.002	LOC100550777	bone morphogenetic protein 8A-like	25	protein_coding
Up	ENSMGAG00000003199	3.27019	0.00345	KCNT1	potassium sodium-activated channel subfamily T member 1 [Source:HGNC Symbol;Acc:HGNC:18865]	19	protein_coding
Up	ENSMGAG00000012736	3.26188	0.046	PIPOX	pipecolic acid and sarcosine oxidase	21	protein_coding
Up	ENSMGAG00000013486	3.24653	0.00229	LOC100542306	extracellular serine/threonine protein kinase FAM20C-like	1	protein_coding
Up	ENSMGAG00000013495	3.22964	2.56e-05	NR2E1	nuclear receptor subfamily 2 group E member 1 [Source:HGNC Symbol;Acc:HGNC:7973]	2	protein_coding
Up	ENSMGAG00000021051	3.22944	9.31e-08	PI15	peptidase inhibitor 15 [Source:NCBI gene;Acc:374241] ortholog	3	protein_coding
Up	ENSMGAG00000003153	3.19516	2.22e-06	FAM83D	Family with sequence similarity 83 member D	22	protein_coding
Up	ENSMGAG00000008269	3.18995	2.24e-05	TNNI2	troponin I2, fast skeletal type	5	protein_coding
Up	ENSMGAG00000021423	3.179	0.0384	LOC100545742	homeobox protein CDX-4-like	9	protein_coding
Up	ENSMGAG00000022743	3.16828	0.0429	ENSMGAG00000022743	lncRNA	10	lncRNA
Up	ENSMGAG00000006116	3.16786	7.05e-05	FOXN4	forkhead box N4 [Source:HGNC Symbol;Acc:HGNC:21399]	17	protein_coding
Up	ENSMGAG00000008254	3.15708	0.035	LOC100550754	lysosomal acid lipase/cholesteryl ester hydrolase-like	8	protein_coding
Up	ENSMGAG00000014826	3.15372	2.57e-06	ST6GAL2	ST6 beta-galactoside alpha-2,6-sialyltransferase 2 [Source:HGNC Symbol;Acc:HGNC:10861]	1	protein_coding
Up	ENSMGAG00000016642	3.14189	6.99e-09	ENSMGAG00000016642	WD_REPEATS_REGION domain-containing protein	KN386793.1	protein_coding
Up	ENSMGAG00000020926	3.13038	0.0256	FOXF2	forkhead box F2	ADDD02257811.1	protein_coding
Up	ENSMGAG00000005659	3.10923	2.35e-08	LHCGR	luteinizing hormone/choriogonadotropin receptor	2	protein_coding
Up	ENSMGAG00000003923	3.09807	4.82e-07	KIF20A	kinesin family member 20A	15	protein_coding
Up	ENSMGAG00000012093	3.08991	0.000485	CCNE2	cyclin E2 [Source:HGNC Symbol;Acc:HGNC:1590]	3	protein_coding
Up	ENSMGAG00000007795	3.08122	0.0187	LOC100550948	interferon alpha-inducible protein 27-like protein 2B	3	protein_coding
Up	ENSMGAG00000016035	3.07753	0.00145	LOC100539660	sterile alpha motif domain-containing protein 9-like	6	protein_coding
Up	ENSMGAG00000012353	3.04602	0.0208	CACNA1I	calcium voltage-gated channel subunit alpha1 I [Source:HGNC Symbol;Acc:HGNC:1396]	1	protein_coding
Up	ENSMGAG00000006510	3.01091	4.23e-07	PLK1	polo like kinase 1	16	protein_coding
Up	ENSMGAG00000019620	3.00395	2.26e-12	LOC100549193	pseudouridine-metabolizing bifunctional protein C1861.05-like [ Meleagris gallopavo (turkey) ]	1	protein_coding
Up	ENSMGAG00000002432	2.99692	0.0133	DDX60	DExD/H-box helicase 60 [Source:HGNC Symbol;Acc:HGNC:25942]	4	protein_coding
Up	ENSMGAG00000010677	2.95511	1.04e-08	TSPAN8	tetraspanin 8 [Source:HGNC Symbol;Acc:HGNC:11855]	1	protein_coding
Up	ENSMGAG00000000890	2.94688	1.51e-05	LOC100545191	neurofascin	28	protein_coding
Up	ENSMGAG00000002460	2.9466	1.56e-05	LOC100540415	LIM homeobox transcription factor 1-alpha-like	1	protein_coding
Up	ENSMGAG00000007451	2.91416	8.47e-10	CCNO	cyclin O	ADDD02196004.1	protein_coding
Up	ENSMGAG00000014334	2.9119	0.0161	ENSMGAG00000014334	KIND domain-containing protein	1	protein_coding
Up	ENSMGAG00000002915	2.89294	5.59e-10	STRA6	signaling receptor and transporter of retinol STRA6 [Source:HGNC Symbol;Acc:HGNC:30650]	12	protein_coding
Up	ENSMGAG00000019604	2.88907	0.0133	RSAD2	radical S-adenosyl methionine domain containing 2	2	protein_coding
Up	ENSMGAG00000018468	2.86614	3.67e-16	LOC104909322	elastin-like	21	protein_coding
Up	ENSMGAG00000012225	2.86611	4.75e-09	THBS2	thrombospondin 2 [Source:HGNC Symbol;Acc:HGNC:11786]	2	protein_coding
Up	ENSMGAG00000006120	2.85147	0.00481	SBK2	SH3 domain binding kinase family member 2	3	protein_coding
Up	ENSMGAG00000005790	2.84366	7.7e-05	MYOM3	myomesin 3 [Source:HGNC Symbol;Acc:HGNC:26679]	25	protein_coding
Up	ENSMGAG00000018393	2.83889	0.0129	CACNG5	calcium voltage-gated channel auxiliary subunit gamma 5 [Source:HGNC Symbol;Acc:HGNC:1409]	20	protein_coding
Up	ENSMGAG00000007585	2.83762	7.92e-06	KPNA2	karyopherin subunit alpha 2 [Source:HGNC Symbol;Acc:HGNC:6395]	20	protein_coding
Up	ENSMGAG00000018580	2.82847	6.71e-08	LOC100545757	protein-arginine deiminase type-1-like	ADDD02062518.1	protein_coding
Up	ENSMGAG00000022947	2.81247	8.43e-05	MYCN	v-myc avian myelocytomatosis viral oncogene neuroblastoma derived homolog [Source:NCBI gene;Acc:421948] ortholog	2	protein_coding
Up	ENSMGAG00000002848	2.81223	7.01e-08	TRAIP	TRAF interacting protein	14	protein_coding
Up	ENSMGAG00000002086	2.81137	2.27e-15	ENSMGAG00000002086	lncRNA	21	lncRNA
Up	ENSMGAG00000002968	2.79229	8.19e-07	CDK1	cyclin dependent kinase 1	8	protein_coding
Up	ENSMGAG00000003806	2.7894	0.000599	acsbg1	acyl-CoA synthetase bubblegum family member 1	12	protein_coding
Up	ENSMGAG00000018032	2.7764	0.00114	MIR210A	Gallus gallus microRNA mir-210a (MIR210A)	5	miRNA
Up	ENSMGAG00000014978	2.77571	0.0273	EPSTI1	Epithelial stromal interaction 1	1	protein_coding
Up	ENSMGAG00000003632	2.77452	0.000207	ENSMGAG00000003632	Uncharacterized protein	1	protein_coding
Up	ENSMGAG00000016655	2.76585	0.000304	ENSMGAG00000016655	Uncharacterized protein	1	protein_coding
Up	ENSMGAG00000009761	2.76141	7.22e-11	CDC20	cell division cycle 20	10	protein_coding
Up	ENSMGAG00000014962	2.7483	7.61e-06	DIAPH3	diaphanous related formin 3 [Source:HGNC Symbol;Acc:HGNC:15480]	1	protein_coding
Up	ENSMGAG00000013924	2.7472	0.000119	FOXM1	forkhead box M1 [Source:HGNC Symbol;Acc:HGNC:3818]	1	protein_coding
Up	ENSMGAG00000005350	2.72089	0.012	SEMA3E	semaphorin 3E	1	protein_coding
Up	ENSMGAG00000009667	2.69659	2.85e-05	PIF1	ATP-dependent DNA helicase (EC 3.6.4.12)	10	protein_coding
Up	ENSMGAG00000020076	2.69013	6.11e-06	ENSMGAG00000020076	novel protein coding gene	17	protein_coding
Up	ENSMGAG00000012645	2.68091	6.57e-07	C1QTNF6	C1q and TNF related 6 [Source:HGNC Symbol;Acc:HGNC:14343]	1	protein_coding
Up	ENSMGAG00000013923	2.66979	0.0293	RHNO1	RAD9-HUS1-RAD1 interacting nuclear orphan 1	1	protein_coding
Up	ENSMGAG00000013187	2.66878	0.000292	SAMD3	sterile alpha motif domain containing 3	2	protein_coding
Up	ENSMGAG00000002884	2.66826	0.00453	ENSMGAG00000002884	Uncharacterized protein	5	protein_coding
Up	ENSMGAG00000010163	2.66255	1.84e-10	LOC100538712	fibrillin-2-like	30	protein_coding
Up	ENSMGAG00000013384	2.65783	0.00197	FAM26F	calcium homeostasis modulator family member 6	2	protein_coding
Up	ENSMGAG00000003798	2.65281	0.00612	BTG4	BTG anti-proliferation factor 4	26	protein_coding
Up	ENSMGAG00000006232	2.64503	0.00035	GRID2IP	Grid2 interacting protein	16	protein_coding
Up	ENSMGAG00000017835	2.63988	1.04e-05	ENSMGAG00000017835	novel protein coding gene	28	protein_coding
Up	ENSMGAG00000011525	2.62731	0.0108	EXO1	Exonuclease 1 (EC 3.1.-.-)	2	protein_coding
Up	ENSMGAG00000017899	2.6194	3.08e-05	IQCM	IQ motif containing M [ Meleagris gallopavo (turkey) ]	4	protein_coding
Up	ENSMGAG00000017633	2.60654	1.58e-05	SOHO-1	sensory organ homeobox protein SOHo [Source:NCBI gene;Acc:396346] ortholog	4	protein_coding
Up	ENSMGAG00000020073	2.60324	0.0453	ENSMGAG00000020073	lncRNA	11	lncRNA
Up	ENSMGAG00000010167	2.59522	4.6e-07	AGR3	anterior gradient 3, protein disulphide isomerase family member [Source:HGNC Symbol;Acc:HGNC:24167]	6	protein_coding
Up	ENSMGAG00000013982	2.595	0.0112	CMPK2	cytidine/uridine monophosphate kinase 2	2	protein_coding
Up	ENSMGAG00000022534	2.59242	0.0476	LOC100549188	complement C4-like	ADDD02177787.1	protein_coding
Up	ENSMGAG00000005407	2.59188	0.000569	CAPN13	calpain 13	2	protein_coding
Up	ENSMGAG00000002413	2.58945	0.0354	CACNA1B	calcium voltage-gated channel subunit alpha1 B [Source:HGNC Symbol;Acc:HGNC:1389]	19	protein_coding
Up	ENSMGAG00000000794	2.58651	1.62e-10	FABP3	fatty acid-binding protein, heart	25	protein_coding
Up	ENSMGAG00000009281	2.57891	2.28e-05	BCAS1	brain enriched myelin associated protein 1 [Source:HGNC Symbol;Acc:HGNC:974]	22	protein_coding
Up	ENSMGAG00000002239	2.57599	6.57e-07	LOC100546724	cytochrome P450 2K4-like	16	protein_coding
Up	ENSMGAG00000021658	2.57007	2.13e-07	ENSMGAG00000021658	novel protein coding gene	8	protein_coding
Up	ENSMGAG00000002426	2.56796	0.00389	ETV7	ETS variant transcription factor 7 [Source:HGNC Symbol;Acc:HGNC:18160]	28	protein_coding
Up	ENSMGAG00000001115	2.56751	3.61e-10	ENSMGAG00000001115	receptor-type tyrosine-protein phosphatase V-like	28	protein_coding
Up	ENSMGAG00000001987	2.56089	0.00135	ARHGEF39	Rho guanine nucleotide exchange factor 39 [Source:HGNC Symbol;Acc:HGNC:25909]	Z	protein_coding
Up	ENSMGAG00000021178	2.5599	0.0251	ENSMGAG00000021178	novel protein coding gene	15	protein_coding
Up	ENSMGAG00000022058	2.55766	0.00131	ENSMGAG00000022058	novel protein coding gene	ADDD02158499.1	protein_coding
Up	ENSMGAG00000009530	2.55679	8.06e-07	CENPF	centromere protein F [Source:HGNC Symbol;Acc:HGNC:1857]	2	protein_coding
Up	ENSMGAG00000020534	2.55301	5.49e-09	ENSMGAG00000020534	lncRNA	11	lncRNA
Up	ENSMGAG00000017663	2.54701	0.00017	TEX36	testis expressed 36 [Source:HGNC Symbol;Acc:HGNC:31653]	8	protein_coding
Up	ENSMGAG00000004497	2.54655	0.00246	ADGRB2	Adhesion G protein-coupled receptor B2	25	protein_coding
Up	ENSMGAG00000005648	2.54589	1.05e-05	ASPM	assembly factor for spindle microtubules	10	protein_coding
Up	ENSMGAG00000008070	2.54559	3.17e-09	UBE2C	Ubiquitin conjugating enzyme E2 C	22	protein_coding
Up	ENSMGAG00000009856	2.53913	6.95e-05	ARHGAP19	Rho GTPase activating protein 19	8	protein_coding
Up	ENSMGAG00000020632	2.51773	0.00223	ENSMGAG00000020632	novel protein coding gene	15	protein_coding
Up	ENSMGAG00000018986	2.51747	0.0235	ENSMGAG00000018986	novel protein coding gene	1	protein_coding
Up	ENSMGAG00000014235	2.51442	0.00597	TBX15	T-box transcription factor 15 [Source:HGNC Symbol;Acc:HGNC:11594]	1	protein_coding
Up	ENSMGAG00000002303	2.51098	3.75e-05	E2F8	E2F transcription factor 8 [Source:HGNC Symbol;Acc:HGNC:24727]	5	protein_coding
Up	ENSMGAG00000014168	2.50604	0.0483	INSRR	insulin receptor related receptor	27	pseudogene
Up	ENSMGAG00000010511	2.50027	1.38e-06	RACGAP1	Rac GTPase activating protein 1	17	protein_coding
Up	ENSMGAG00000003416	2.4814	2.85e-05	CENPL	centromere protein L	10	protein_coding
Up	ENSMGAG00000009189	2.48038	0.000379	UNC13A	unc-13 homolog A	30	protein_coding
Up	ENSMGAG00000015826	2.47783	0.0076	TMEM151B	transmembrane protein 151B	2	protein_coding
Up	ENSMGAG00000001799	2.46149	0.0124	KCNU1	potassium calcium-activated channel subfamily U member 1 [Source:HGNC Symbol;Acc:HGNC:18867]	24	protein_coding
Up	ENSMGAG00000011583	2.45934	3.12e-08	CRISPLD1	cysteine rich secretory protein LCCL domain containing 1	3	protein_coding
Up	ENSMGAG00000020380	2.441	1.81e-06	ENSMGAG00000020380	lncRNA	12	lncRNA
Up	ENSMGAG00000020605	2.4345	0.00354	ENSMGAG00000020605	novel protein coding gene	KN389589.1	protein_coding
Up	ENSMGAG00000020162	2.43313	0.000553	ENSMGAG00000020162	lncRNA	Z	lncRNA
Up	ENSMGAG00000021121	2.42929	0.0156	FBN3	fibrillin 3 [Source:NCBI gene;Acc:395079] ortholog	30	protein_coding
Up	ENSMGAG00000007612	2.42358	3.51e-09	ENSMGAG00000007612	Uncharacterized protein	13	protein_coding
Up	ENSMGAG00000021731	2.42335	0.0178	ENSMGAG00000021731	novel protein coding gene	1	protein_coding
Up	ENSMGAG00000018449	2.42151	0.0153	CA3B	arbonic anhydrase 3B [Source:NCBI gene;Acc:420209] ortholog	3	protein_coding
Up	ENSMGAG00000012027	2.41921	3.94e-05	DEPDC1	DEP domain containing 1 [Source:HGNC Symbol;Acc:HGNC:22949]	10	protein_coding
Up	ENSMGAG00000020747	2.40662	0.00177	ERI2	ERI1 exoribonuclease family member 2 [Source:NCBI gene;Acc:427000] ortholog	16	protein_coding
Up	ENSMGAG00000009294	2.40396	3.73e-05	CENPI	centromere protein I	9	protein_coding
Up	ENSMGAG00000020929	2.40375	0.00396	ENSMGAG00000020929	lncRNA	1	lncRNA
Up	ENSMGAG00000022128	2.40296	0.0186	TRPC7	transient receptor potential cation channel subfamily C member 7 [Source:NCBI gene;Acc:427641] ortholog	15	protein_coding
Up	ENSMGAG00000004801	2.39309	0.0113	LOC100543636	ovoinhibitor	15	protein_coding
Up	ENSMGAG00000022600	2.38934	0.00278	ENSMGAG00000022600	novel protein coding gene	KN387305.1	protein_coding
Up	ENSMGAG00000021040	2.38553	0.00124	ENSMGAG00000021040	novel protein coding gene	5	protein_coding
Up	ENSMGAG00000021019	2.3743	0.00781	ENSMGAG00000021019	lncRNA	2	lncRNA
Up	ENSMGAG00000013856	2.3684	0.0133	ENSMGAG00000013856	Uncharacterized protein	2	protein_coding
Up	ENSMGAG00000017191	2.36725	3.04e-12	TLL2	tolloid like 2 [Source:HGNC Symbol;Acc:HGNC:11844]	8	protein_coding
Up	ENSMGAG00000017037	2.35978	2.46e-07	depdc1b	DEP domain containing 1B	Z	protein_coding
Up	ENSMGAG00000020577	2.35581	0.044	ENSMGAG00000020577	lncRNA	30	lncRNA
Up	ENSMGAG00000014095	2.35364	5.3e-06	LOC100539643	C-type natriuretic peptide 2-like	1	protein_coding
Up	ENSMGAG00000010664	2.34401	0.00362	ENSMGAG00000010664	Ion_trans domain-containing protein	7	protein_coding
Up	ENSMGAG00000015067	2.33792	0.00689	MAB21L2	protein mab-21-like 2	ADDD02150410.1	protein_coding
Up	ENSMGAG00000010548	2.33625	0.0228	STK31	serine/threonine kinase 31 [Source:HGNC Symbol;Acc:HGNC:11407]	6	protein_coding
Up	ENSMGAG00000021477	2.33589	0.0292	ENSMGAG00000021477	lncRNA	5	lncRNA
Up	ENSMGAG00000001367	2.32908	1.66e-08	NTM	neurotrimin [Source:HGNC Symbol;Acc:HGNC:17941]	26	protein_coding
Up	ENSMGAG00000021173	2.32775	0.00257	ENSMGAG00000021173	novel protein coding gene	27	protein_coding
Up	ENSMGAG00000009941	2.31734	3.66e-07	ECT2	epithelial cell transforming 2 [Source:HGNC Symbol;Acc:HGNC:3155]	11	protein_coding
Up	ENSMGAG00000021903	2.30834	1.92e-05	ANKLE1	ankyrin repeat and LEM domain containing 1 [Source:HGNC Symbol;Acc:HGNC:26812]	30	protein_coding
Up	ENSMGAG00000014705	2.30813	0.0251	EGFL6	EGF like domain multiple 6 [Source:HGNC Symbol;Acc:HGNC:3235]	1	protein_coding
Up	ENSMGAG00000005155	2.30663	0.00617	NCAPG2	non-SMC condensin II complex subunit G2 [Source:HGNC Symbol;Acc:HGNC:21904]	6	protein_coding
Up	ENSMGAG00000008597	2.30191	0.000463	LOC100543189	kinesin-like protein KIF1A	11	protein_coding
Up	ENSMGAG00000011365	2.29931	2.56e-05	ENSMGAG00000011365	Uncharacterized protein	6	protein_coding
Up	ENSMGAG00000010103	2.29893	5.43e-07	ENSMGAG00000010103	Uncharacterized protein	5	protein_coding
Up	ENSMGAG00000002316	2.29533	0.00154	POU2F3	POU class 2 homeobox 3 [Source:HGNC Symbol;Acc:HGNC:19864]	26	protein_coding
Up	ENSMGAG00000015796	2.29528	0.00518	RAG2	recombination activating 2 [Source:HGNC Symbol;Acc:HGNC:9832]	5	protein_coding
Up	ENSMGAG00000015946	2.28662	0.00643	ELFN2	extracellular leucine rich repeat and fibronectin type III domain containing 2 [Source:HGNC Symbol;Acc:HGNC:29396]	1	protein_coding
Up	ENSMGAG00000021726	2.28577	1.8e-27	MFAP2	microfibril associated protein 2 [Source:HGNC Symbol;Acc:HGNC:7033]	23	protein_coding
Up	ENSMGAG00000016464	2.28202	0.00019	ENSMGAG00000016464	Uncharacterized protein	14	protein_coding
Up	ENSMGAG00000022783	2.28138	0.00176	ENSMGAG00000022783	novel protein coding gene	7	protein_coding
Up	ENSMGAG00000015757	2.27982	0.00355	ADRA2C	adrenoceptor alpha 2C	4	protein_coding
Up	ENSMGAG00000005491	2.27238	2.13e-07	LOC100543177	kinesin-like protein KIF1A	11	pseudogene
Up	ENSMGAG00000003519	2.27187	4.2e-05	TUBAL3	tubulin alpha-3 chain	1	protein_coding
Up	ENSMGAG00000021248	2.26835	0.0158	ENSMGAG00000021248	novel protein coding gene	1	protein_coding
Up	ENSMGAG00000007853	2.26129	0.0112	KIAA1755	KIAA1755	22	protein_coding
Up	ENSMGAG00000019805	2.26111	0.00501	ENSMGAG00000019805	novel protein coding gene	5	protein_coding
Up	ENSMGAG00000020624	2.25762	0.000575	ENSMGAG00000020624	novel protein coding gene	8	protein_coding
Up	ENSMGAG00000004316	2.25468	2.76e-08	NCAM1	neural cell adhesion molecule 1 [Source:HGNC Symbol;Acc:HGNC:7656]	26	protein_coding
Up	ENSMGAG00000009789	2.25257	1.9e-08	CCNB3	cyclin B3	9	protein_coding
Up	ENSMGAG00000002005	2.24884	0.00708	GAS2	growth arrest specific 2 [Source:HGNC Symbol;Acc:HGNC:4167]	5	protein_coding
Up	ENSMGAG00000009314	2.24673	6.85e-05	TOP2A	topoisomerase (DNA) II alpha	29	protein_coding
Up	ENSMGAG00000015328	2.24549	4.99e-07	LRRC18	leucine rich repeat containing 18 [Source:HGNC Symbol;Acc:HGNC:23199]	8	protein_coding
Up	ENSMGAG00000016768	2.24531	0.0273	TFAP2A	transcription factor AP-2 alpha [Source:HGNC Symbol;Acc:HGNC:11742]	3	protein_coding
Up	ENSMGAG00000007206	2.24469	1.92e-09	TPX2	TPX2 microtubule nucleation factor	22	protein_coding
Up	ENSMGAG00000019223	2.23796	0.00183	KNL1	kinetochore scaffold 1 [Source:HGNC Symbol;Acc:HGNC:24054]	5	protein_coding
Up	ENSMGAG00000020688	2.22909	6.12e-05	LOC104909562	TFIIA-alpha and beta-like factor [ Meleagris gallopavo (turkey) ]	2	protein_coding
Up	ENSMGAG00000010545	2.22668	4.08e-05	FAM221A	family with sequence similarity 221 member A [Source:HGNC Symbol;Acc:HGNC:27977]	6	protein_coding
Up	ENSMGAG00000017331	2.21773	3.58e-06	CRYBB2	crystallin beta B2	17	protein_coding
Up	ENSMGAG00000011242	2.20647	3.94e-05	ASIC4	Acid sensing ion channel subunit family member 4	7	protein_coding
Up	ENSMGAG00000008713	2.20567	3.18e-06	ODF2L	outer dense fiber of sperm tails 2 like [Source:HGNC Symbol;Acc:HGNC:29225]	10	protein_coding
Up	ENSMGAG00000022718	2.20305	0.0268	ENSMGAG00000022718	novel protein coding gene	4	protein_coding
Up	ENSMGAG00000017287	2.19984	0.0208	MEOX1	mesenchyme homeobox 1 [Source:HGNC Symbol;Acc:HGNC:7013]	29	protein_coding
Up	ENSMGAG00000008709	2.1965	2.39e-07	ENSMGAG00000008709	Uncharacterized protein	27	protein_coding
Up	ENSMGAG00000011008	2.19576	2.73e-06	MDK	midkine [Source:HGNC Symbol;Acc:HGNC:6972]	5	protein_coding
Up	ENSMGAG00000010845	2.19211	0.0034	LOC100546506	sodium channel protein type 2 subunit alpha	7	protein_coding
Up	ENSMGAG00000017834	2.19187	0.0231	LGI3	leucine rich repeat LGI family member 3 [Source:NCBI gene;Acc:107049625] ortholog	KN388584.1	protein_coding
Up	ENSMGAG00000012321	2.18353	0.000147	ACTC1	actin, alpha cardiac muscle 1	5	protein_coding
Up	ENSMGAG00000013696	2.18297	1.4e-07	CDKN3	cyclin dependent kinase inhibitor 3 [Source:HGNC Symbol;Acc:HGNC:1791]	5	protein_coding
Up	ENSMGAG00000015036	2.17954	0.000753	CKAP2	cytoskeleton associated protein 2 [Source:HGNC Symbol;Acc:HGNC:1990]	1	protein_coding
Up	ENSMGAG00000005841	2.17872	0.00284	NTSR1	neurotensin receptor 1	22	protein_coding
Up	ENSMGAG00000007444	2.17721	9.59e-07	ENSMGAG00000007444	Uncharacterized protein	13	protein_coding
Up	ENSMGAG00000006021	2.16808	2.58e-16	SPARC	secreted protein acidic and cysteine rich	15	protein_coding
Up	ENSMGAG00000013071	2.16296	0.00341	LOC100544119	PCNA-interacting partner	1	protein_coding
Up	ENSMGAG00000002136	2.15044	0.00352	NGFR	nerve growth factor receptor [Source:HGNC Symbol;Acc:HGNC:7809]	29	protein_coding
Up	ENSMGAG00000009437	2.13721	0.0217	LOC100549516	fatty acid desaturase 1-like	5	protein_coding
Up	ENSMGAG00000020093	2.13494	0.000247	HASPIN	histone H3 associated protein kinase [Source:HGNC Symbol;Acc:HGNC:19682]	21	protein_coding
Up	ENSMGAG00000003474	2.13437	0.0091	C5	complement C5 [Source:HGNC Symbol;Acc:HGNC:1331]	19	protein_coding
Up	ENSMGAG00000006543	2.13315	7.15e-05	ARSI	arylsulfatase family member I	15	protein_coding
Up	ENSMGAG00000005913	2.12581	0.00176	C23H1orf158	chromosome 23 C1orf158 homolog	23	protein_coding
Up	ENSMGAG00000001337	2.12221	0.000296	MYO7B	myosin VIIB	11	protein_coding
Up	ENSMGAG00000010729	2.11591	0.00116	CREB5	cAMP responsive element binding protein 5	6	protein_coding
Up	ENSMGAG00000019128	2.11219	0.00099	PLAC8L1	Placenta-specific 8-like 1 [Source:NCBI gene;Acc:770777] ortholog	4	protein_coding
Up	ENSMGAG00000010515	2.10081	0.0116	LOC100547944	riboflavin-binding protein	10	protein_coding
Up	ENSMGAG00000018068	2.10009	0.00028	ENSMGAG00000018068	novel protein coding gene	27	protein_coding
Up	ENSMGAG00000015563	2.08747	4.23e-05	MEX3A	mex-3 RNA binding family member A	KN389210.1	protein_coding
Up	ENSMGAG00000019258	2.08554	0.00193	ENSMGAG00000019258	novel protein coding gene	5	protein_coding
Up	ENSMGAG00000010715	2.08499	0.000131	KCNAB1	potassium voltage-gated channel subfamily A member regulatory beta subunit 1 [Source:HGNC Symbol;Acc:HGNC:6228]	11	protein_coding
Up	ENSMGAG00000003453	2.07274	0.00703	FAM72A	family with sequence similarity 72 member A	28	protein_coding
Up	ENSMGAG00000012508	2.06957	0.00247	SOX10	SRY-box transcription factor 10 [Source:HGNC Symbol;Acc:HGNC:11190]	1	protein_coding
Up	ENSMGAG00000011632	2.06709	6.95e-05	GAS2L3	growth arrest specific 2 like 3 [Source:HGNC Symbol;Acc:HGNC:27475]	1	protein_coding
Up	ENSMGAG00000003571	2.06018	1.71e-05	NUF2	NUF2 component of NDC80 kinetochore complex	10	protein_coding
Up	ENSMGAG00000004403	2.05522	0.00238	LOC100550517	corticosteroid 11-beta-dehydrogenase isozyme 1-like	28	protein_coding
Up	ENSMGAG00000022954	2.05426	1.67e-07	LIF	LIF interleukin 6 family cytokine [Source:HGNC Symbol;Acc:HGNC:6596]	17	protein_coding
Up	ENSMGAG00000000821	2.05362	1.58e-06	CDCA2	cell division cycle associated 2	24	protein_coding
Up	ENSMGAG00000005744	2.05147	0.0127	GATA5	GATA binding protein 5	22	protein_coding
Up	ENSMGAG00000008795	2.05019	9.72e-06	FAM107A	family with sequence similarity 107 member A [Source:HGNC Symbol;Acc:HGNC:30827]	14	protein_coding
Up	ENSMGAG00000018108	2.04419	0.00788	ENSMGAG00000018108	lncRNA	13	lncRNA
Up	ENSMGAG00000001157	2.04397	1.58e-06	ESPL1	Extra spindle pole bodies like 1, separase	KN389185.1	protein_coding
Up	ENSMGAG00000019397	2.04108	0.0215	ENSMGAG00000019397	novel protein coding gene	28	protein_coding
Up	ENSMGAG00000001660	2.03936	4.61e-05	KIF18A	kinesin family member 18A [Source:HGNC Symbol;Acc:HGNC:29441]	5	protein_coding
Up	ENSMGAG00000010630	2.02257	8.88e-09	SPC25	SPC25 component of NDC80 kinetochore complex	7	protein_coding
Up	ENSMGAG00000021536	2.02096	0.0478	ENSMGAG00000021536	lncRNA	6	lncRNA
Up	ENSMGAG00000015178	2.01176	7.06e-07	ANGPTL5	angiopoietin like 5	1	protein_coding
Up	ENSMGAG00000004097	2.01105	0.0013	DNA2	DNA replication helicase/nuclease 2 [Source:HGNC Symbol;Acc:HGNC:2939]	8	protein_coding
Up	ENSMGAG00000002777	2.00916	2.9e-09	STMN1	stathmin 1	25	protein_coding
Up	ENSMGAG00000011389	2.00326	0.000729	CENPE	centromere protein E [Source:HGNC Symbol;Acc:HGNC:1856]	4	protein_coding
Up	ENSMGAG00000010217	2.0027	5.05e-05	KIF23	kinesin family member 23 [Source:HGNC Symbol;Acc:HGNC:6392]	12	protein_coding
Up	ENSMGAG00000002450	1.9941	1.05e-16	CAPG	capping actin protein, gelsolin like	ADDD02280049.1	protein_coding
Up	ENSMGAG00000010365	1.98792	0.0326	ENSMGAG00000010365	Exonuclease domain-containing protein	16	protein_coding
Up	ENSMGAG00000009636	1.98681	0.00174	LOC100538455	steroid 21-hydroxylase	18	protein_coding
Up	ENSMGAG00000007262	1.98146	0.00158	MYLK2	myosin light chain kinase 2	22	protein_coding
Up	ENSMGAG00000006260	1.97963	9.25e-06	COL20A1	collagen type XX alpha 1 chain	22	protein_coding
Up	ENSMGAG00000013689	1.9794	0.0175	CGA	glycoprotein hormones, alpha polypeptide [Source:NCBI gene (formerly Entrezgene);Acc:100303682]	2	protein_coding
Up	ENSMGAG00000009062	1.97775	9.73e-05	KIF11	kinesin family member 11 [Source:HGNC Symbol;Acc:HGNC:6388]	8	protein_coding
Up	ENSMGAG00000020408	1.97688	0.0002	SPOCK1	SPARC/osteonectin, cwcv and kazal like domains proteoglycan 1 [Source:NCBI gene;Acc:416304] ortholog	15	protein_coding
Up	ENSMGAG00000011191	1.97409	1.07e-05	NUSAP1	nucleolar and spindle associated protein 1	5	protein_coding
Up	ENSMGAG00000010009	1.97051	4.95e-06	ETV1	ETS variant transcription factor 1 [Source:HGNC Symbol;Acc:HGNC:3490]	6	protein_coding
Up	ENSMGAG00000013621	1.96944	6.02e-09	ARMH4	armadillo like helical domain containing 4 [Source:HGNC Symbol;Acc:HGNC:19846]	5	protein_coding
Up	ENSMGAG00000003365	1.96849	0.0284	LOC100547911	heat shock protein 30C-like	29	protein_coding
Up	ENSMGAG00000001852	1.96566	0.00135	FANCL	FA complementation group L	2	protein_coding
Up	ENSMGAG00000021219	1.9647	0.00758	ENSMGAG00000021219	novel protein coding gene	4	protein_coding
Up	ENSMGAG00000020173	1.95826	1.4e-09	ENSMGAG00000020173	novel protein coding gene	KN389086.1	protein_coding
Up	ENSMGAG00000006984	1.95799	2.59e-12	COL5A1	collagen type V alpha 1 chain	19	protein_coding
Up	ENSMGAG00000005228	1.95763	3.79e-17	COL5A2	collagen type V alpha 2 chain [Source:HGNC Symbol;Acc:HGNC:2210]	7	protein_coding
Up	ENSMGAG00000000730	1.95453	1.45e-05	ENSMGAG00000000730	Protein kinase domain-containing protein	29	protein_coding
Up	ENSMGAG00000010813	1.95354	4.46e-06	SNAI2	snail family transcriptional repressor 2	3	protein_coding
Up	ENSMGAG00000010787	1.95045	0.0252	TRHDE	thyrotropin releasing hormone degrading enzyme [Source:HGNC Symbol;Acc:HGNC:30748]	1	protein_coding
Up	ENSMGAG00000013817	1.94035	0.0491	UPK3A	Uroplakin 3A	1	protein_coding
Up	ENSMGAG00000016829	1.93839	1.23e-05	PCSK5	Proprotein convertase subtilisin/kexin type 5	KN388732.1	protein_coding
Up	ENSMGAG00000016491	1.93153	0.0201	ENSMGAG00000016491	Uncharacterized protein	1	protein_coding
Up	ENSMGAG00000009844	1.93129	3.83e-06	ENSMGAG00000009844	INCENP_ARK-bind domain-containing protein	5	protein_coding
Up	ENSMGAG00000014009	1.926	0.00943	RRM2	ribonucleotide reductase regulatory subunit M2	2	protein_coding
Up	ENSMGAG00000012510	1.92533	2.26e-05	FNDC1	fibronectin type III domain containing 1	2	protein_coding
Up	ENSMGAG00000004996	1.92439	4.53e-05	ADAM19	ADAM metallopeptidase domain 19 [Source:HGNC Symbol;Acc:HGNC:197]	15	protein_coding
Up	ENSMGAG00000008072	1.92214	0.0252	TNNC2	troponin C2, fast skeletal type	22	protein_coding
Up	ENSMGAG00000010781	1.92026	0.00541	TPH2	tryptophan hydroxylase 2 [Source:HGNC Symbol;Acc:HGNC:20692]	1	protein_coding
Up	ENSMGAG00000016059	1.92003	5.71e-05	ANKRD34B	ankyrin repeat domain 34B [Source:HGNC Symbol;Acc:HGNC:33736]	Z	protein_coding
Up	ENSMGAG00000015268	1.91991	0.0106	WNT11	Wnt family member 11	1	protein_coding
Up	ENSMGAG00000011654	1.9174	0.00128	KIAA1456	KIAA1456 ortholog	4	protein_coding
Up	ENSMGAG00000007460	1.91457	1.1e-09	MORN2	MORN repeat containing 2	2	protein_coding
Up	ENSMGAG00000006939	1.91322	3.8e-17	ENSMGAG00000006939	pseudogene	ADDD02078708.1	pseudogene
Up	ENSMGAG00000019011	1.91282	0.00443	ENSMGAG00000019011	lncRNA	30	lncRNA
Up	ENSMGAG00000005159	1.9117	0.00035	CDH6	cadherin 6 [Source:HGNC Symbol;Acc:HGNC:1765]	3	protein_coding
Up	ENSMGAG00000006493	1.91104	2.46e-05	SDK2	sidekick cell adhesion molecule 2	20	protein_coding
Up	ENSMGAG00000022483	1.90731	0.005	CCL21	C-C motif chemokine 21	Z	protein_coding
Up	ENSMGAG00000010111	1.90502	9.85e-05	ENSMGAG00000010111	ANK_REP_REGION domain-containing protein	5	protein_coding
Up	ENSMGAG00000022649	1.89494	5.89e-06	KCNE3	potassium voltage-gated channel subfamily E regulatory subunit 3	1	protein_coding
Up	ENSMGAG00000022143	1.89139	0.0351	CCDC112	coiled-coil domain containing 112 [Source:HGNC Symbol;Acc:HGNC:28599]	Z	protein_coding
Up	ENSMGAG00000019430	1.88624	2.9e-07	ENSMGAG00000019430	lncRNA	13	lncRNA
Up	ENSMGAG00000004680	1.88539	0.000761	PHYHD1	phytanoyl-CoA dioxygenase domain containing 1 [Source:HGNC Symbol;Acc:HGNC:23396]	19	protein_coding
Up	ENSMGAG00000007895	1.88514	0.000283	PCLO	Piccolo presynaptic cytomatrix protein	1	protein_coding
Up	ENSMGAG00000008785	1.88505	1.71e-05	ENSMGAG00000008785	Uncharacterized protein	15	protein_coding
Up	ENSMGAG00000021747	1.88405	0.0123	ENSMGAG00000021747	lncRNA	10	lncRNA
Up	ENSMGAG00000016564	1.88361	0.0164	TMOD1	tropomodulin 1	Z	protein_coding
Up	ENSMGAG00000014823	1.88163	4.13e-07	ECRG4	ECRG4 augurin precursor [Source:HGNC Symbol;Acc:HGNC:24642]	1	protein_coding
Up	ENSMGAG00000021017	1.87891	0.00935	CFC1	cripto, FRL-1, cryptic family 1 [Source:NCBI gene;Acc:395437] ortholog	Z	protein_coding
Up	ENSMGAG00000018721	1.87762	0.00021	ENSMGAG00000018721	novel protein coding gene	28	protein_coding
Up	ENSMGAG00000004919	1.87535	0.00209	CCDC3	coiled-coil domain containing 3 [Source:HGNC Symbol;Acc:HGNC:23813]	1	protein_coding
Up	ENSMGAG00000009375	1.87502	1.22e-08	FMOD	fibromodulin [Source:HGNC Symbol;Acc:HGNC:3774]	28	protein_coding
Up	ENSMGAG00000021346	1.87122	0.000625	ENSMGAG00000021346	novel protein coding gene	6	protein_coding
Up	ENSMGAG00000011772	1.87084	7.26e-05	STRA8	stimulated by retinoic acid 8 [Source:HGNC Symbol;Acc:HGNC:30653]	1	protein_coding
Up	ENSMGAG00000018004	1.86964	0.000936	LOC104914691	uncharacterized protein KIAA1958-like	30	protein_coding
Up	ENSMGAG00000017838	1.86802	0.000192	LOC100541562	putative P2Y purinoceptor 10	9	protein_coding
Up	ENSMGAG00000009650	1.8659	4.61e-07	ENSMGAG00000009650	Uncharacterized protein	18	protein_coding
Up	ENSMGAG00000018626	1.86336	0.012	ENSMGAG00000018626	novel protein coding gene	16	protein_coding
Up	ENSMGAG00000009104	1.85988	0.0038	IRF7	interferon regulatory factor 7 [Source:HGNC Symbol;Acc:HGNC:6122]	5	protein_coding
Up	ENSMGAG00000007702	1.85937	6.19e-05	CDT1	chromatin licensing and DNA replication factor 1 [Source:HGNC Symbol;Acc:HGNC:24576]	13	protein_coding
Up	ENSMGAG00000016914	1.85854	1.67e-09	CTSK	cathepsin K [Source:HGNC Symbol;Acc:HGNC:2536]	27	protein_coding
Up	ENSMGAG00000022376	1.85788	0.000846	ENSMGAG00000022376	novel protein coding gene	ADDD02199392.1	protein_coding
Up	ENSMGAG00000007477	1.84709	7.16e-09	ADAMTS2	ADAM metallopeptidase with thrombospondin type 1 motif 2	15	protein_coding
Up	ENSMGAG00000010113	1.84693	9.57e-07	KIF2C	Kinesin-like protein	10	protein_coding
Up	ENSMGAG00000017849	1.84212	0.0416	ENSMGAG00000017849	lncRNA	11	lncRNA
Up	ENSMGAG00000004763	1.83989	0.000631	MCM10	minichromosome maintenance 10 replication initiation factor [Source:HGNC Symbol;Acc:HGNC:18043]	1	protein_coding
Up	ENSMGAG00000002545	1.83215	0.0152	LOC100539142	dispanin subfamily A member 2b-like	5	protein_coding
Up	ENSMGAG00000018493	1.82351	0.0329	ENSMGAG00000018493	lncRNA	8	lncRNA
Up	ENSMGAG00000003313	1.8168	0.0219	CYP3A80	cytochrome P450 3A80	16	protein_coding
Up	ENSMGAG00000021776	1.81635	0.000755	ENSMGAG00000021776	novel protein coding gene	2	protein_coding
Up	ENSMGAG00000004343	1.81374	2.68e-12	COL16A1	collagen type XVI alpha 1 chain	25	protein_coding
Up	ENSMGAG00000014981	1.8135	0.0208	LOC100546440	ecto-NOX disulfide-thiol exchanger 1-like	1	protein_coding
Up	ENSMGAG00000019437	1.8125	0.0186	ENSMGAG00000019437	novel protein coding gene	KN389566.1	protein_coding
Up	ENSMGAG00000018291	1.81239	0.00545	PLPPR3	phospholipid phosphatase related 3 [Source:HGNC Symbol;Acc:HGNC:23497]	30	protein_coding
Up	ENSMGAG00000001647	1.80667	2.41e-15	AEBP1	AE binding protein 1	KN386979.1	pseudogene
Up	ENSMGAG00000014621	1.80235	0.0019	SYTL5	synaptotagmin like 5 [Source:HGNC Symbol;Acc:HGNC:15589]	1	protein_coding
Up	ENSMGAG00000018129	1.80142	0.000761	LOC104914090	neurofilament heavy polypeptide-like	22	protein_coding
Up	ENSMGAG00000020056	1.79517	0.0288	C1H3orf52	chromosome 1 C3orf52 homolog [ Meleagris gallopavo (turkey) ]	1	protein_coding
Up	ENSMGAG00000007267	1.79285	0.000237	C15orf48	chromosome 15 open reading frame 48 [Source:HGNC Symbol;Acc:HGNC:29898]	12	protein_coding
Up	ENSMGAG00000010714	1.79103	0.00471	MDGA1	MAM domain containing glycosylphosphatidylinositol anchor 1 [Source:HGNC Symbol;Acc:HGNC:19267]	2	protein_coding
Up	ENSMGAG00000000998	1.78927	0.0141	LOC100548610	PH and SEC7 domain-containing protein 2-like	15	protein_coding
Up	ENSMGAG00000021769	1.78888	0.00115	ENSMGAG00000021769	lncRNA	30	lncRNA
Up	ENSMGAG00000007521	1.78698	0.000155	GTSE1	G2 and S-phase expressed 1	1	protein_coding
Up	ENSMGAG00000015026	1.78553	0.00462	FAM124A	family with sequence similarity 124 member A [Source:HGNC Symbol;Acc:HGNC:26413]	1	protein_coding
Up	ENSMGAG00000004813	1.78069	0.00134	LOC100541469	ovomucoid	15	protein_coding
Up	ENSMGAG00000001967	1.77648	1.73e-15	COL18A1	collagen type XVIII alpha 1 chain	7	pseudogene
Up	ENSMGAG00000014121	1.77557	2.92e-06	PBK	PDZ binding kinase [Source:HGNC Symbol;Acc:HGNC:18282]	2	protein_coding
Up	ENSMGAG00000006441	1.77235	0.00218	LOC100548707	collagen alpha-1 (XI) chain-like	10	protein_coding
Up	ENSMGAG00000001972	1.77207	7.53e-06	CRABP2	cellular retinoic acid binding protein 2 [Source:HGNC Symbol;Acc:HGNC:2339]	27	protein_coding
Up	ENSMGAG00000022236	1.77129	0.00466	ISLR2	immunoglobulin superfamily containing leucine rich repeat 2 [Source:HGNC Symbol;Acc:HGNC:29286]	12	protein_coding
Up	ENSMGAG00000003165	1.77092	7.16e-09	ASTN2	astrotactin 2 [Source:HGNC Symbol;Acc:HGNC:17021]	19	protein_coding
Up	ENSMGAG00000006917	1.76934	0.00266	HPGD	15-hydroxyprostaglandin dehydrogenase	4	protein_coding
Up	ENSMGAG00000013363	1.76603	2.53e-05	DDX11	DEAD/H-box helicase 11	1	protein_coding
Up	ENSMGAG00000016989	1.76331	0.00671	SEZ6L	seizure related 6 homolog like [Source:HGNC Symbol;Acc:HGNC:10763]	17	protein_coding
Up	ENSMGAG00000019114	1.76262	2.39e-09	SCN2B	sodium voltage-gated channel beta subunit 2 [Source:HGNC Symbol;Acc:HGNC:10589]	26	protein_coding
Up	ENSMGAG00000009764	1.76235	0.0181	DTL	denticleless E3 ubiquitin protein ligase homolog [Source:HGNC Symbol;Acc:HGNC:30288]	2	protein_coding
Up	ENSMGAG00000020513	1.75695	2.92e-05	ENSMGAG00000020513	lncRNA	3	lncRNA
Up	ENSMGAG00000001949	1.75603	0.000173	COL15A1	Collagen type XV alpha 1 chain	3	protein_coding
Up	ENSMGAG00000011992	1.75597	0.0032	SLC10A4	Solute carrier family 10 member 4	4	protein_coding
Up	ENSMGAG00000010990	1.7555	0.000548	SGO1	Shugoshin 1	6	protein_coding
Up	ENSMGAG00000007351	1.75262	2.36e-12	OLFM1	olfactomedin 1 [Source:HGNC Symbol;Acc:HGNC:17187]	19	protein_coding
Up	ENSMGAG00000020373	1.75242	2.05e-06	ENSMGAG00000020373	novel protein coding gene	22	protein_coding
Up	ENSMGAG00000022112	1.75186	0.00781	ENSMGAG00000022112	novel protein coding gene	ADDD02181381.1	protein_coding
Up	ENSMGAG00000008087	1.74625	0.000678	DPYSL5	dihydropyrimidinase like 5 [Source:HGNC Symbol;Acc:HGNC:20637]	2	protein_coding
Up	ENSMGAG00000001501	1.74454	5.47e-07	KIF4A	kinesin family member 4A	9	protein_coding
Up	ENSMGAG00000004671	1.74123	0.0385	EFNA2	Ephrin A2	ADDD02148265.1	protein_coding
Up	ENSMGAG00000017847	1.73712	5.47e-06	COL5A1	collagen type V alpha 1 chain [Source:NCBI gene;Acc:395568]ortholog	19	protein_coding
Up	ENSMGAG00000010189	1.73636	8.36e-10	DYNLT4	dynein light chain Tctex-type 4 [Source:HGNC Symbol;Acc:HGNC:32315]	10	protein_coding
Up	ENSMGAG00000000816	1.73368	1.02e-05	ENSMGAG00000000816	1-acyl-sn-glycerol-3-phosphate acyltransferase (EC 2.3.1.51)	29	protein_coding
Up	ENSMGAG00000005162	1.73037	5.59e-05	OLFML2B	olfactomedin like 2B	10	protein_coding
Up	ENSMGAG00000008068	1.72905	0.000631	PLAC8	placenta specific 8	4	protein_coding
Up	ENSMGAG00000000873	1.72792	1.56e-05	EDA2R	ectodysplasin A2 receptor	9	protein_coding
Up	ENSMGAG00000007535	1.72359	0.002	TP63	tumor protein p63 [Source:HGNC Symbol;Acc:HGNC:15979]	11	protein_coding
Up	ENSMGAG00000003034	1.71949	0.00132	FRMD7	FERM domain containing 7 [Source:HGNC Symbol;Acc:HGNC:8079]	9	protein_coding
Up	ENSMGAG00000007751	1.71945	2.18e-05	LOC100546675	bactericidal permeability-increasing protein-like	22	protein_coding
Up	ENSMGAG00000009859	1.71874	4.4e-05	SLIT1	slit guidance ligand 1 [Source:HGNC Symbol;Acc:HGNC:11085]	8	protein_coding
Up	ENSMGAG00000014696	1.71461	4.53e-05	ASB9	ankyrin repeat and SOCS box containing 9 [Source:HGNC Symbol;Acc:HGNC:17184]	1	protein_coding
Up	ENSMGAG00000006336	1.711	0.00752	ENSMGAG00000006336	Uncharacterized protein	2	protein_coding
Up	ENSMGAG00000012860	1.70604	0.000371	WISP1	cellular communication network factor 4	3	protein_coding
Up	ENSMGAG00000021650	1.70584	0.0333	ENSMGAG00000021650	lncRNA	25	lncRNA
Up	ENSMGAG00000003511	1.70074	0.0277	PIGR	polymeric immunoglobulin receptor	28	protein_coding
Up	ENSMGAG00000015918	1.69989	0.000584	LOC100549421	gap junction gamma-1 protein-like	7	protein_coding
Up	ENSMGAG00000012358	1.69807	8.43e-05	CTHRC1	collagen triple helix repeat containing 1 [Source:HGNC Symbol;Acc:HGNC:18831]	3	protein_coding
Up	ENSMGAG00000018223	1.6963	0.0107	ENSMGAG00000018223	novel protein coding gene	22	protein_coding
Up	ENSMGAG00000007013	1.69463	7.54e-06	WFDC1	WAP four-disulfide core domain 1 [Source:HGNC Symbol;Acc:HGNC:15466]	13	protein_coding
Up	ENSMGAG00000017517	1.69302	0.00177	GREB1	growth regulating estrogen receptor binding 1 [Source:NCBI gene;Acc:421944] ortholog	2	protein_coding
Up	ENSMGAG00000017518	1.68824	0.0492	ENSMGAG00000017518	novel protein coding gene	KN388329.1	protein_coding
Up	ENSMGAG00000011470	1.68486	0.0164	LOC100545319	eyes absent homolog 1	3	protein_coding
Up	ENSMGAG00000017515	1.68323	0.000181	C7H2orf88	chromosome 7 C2orf88 homolog	7	protein_coding
Up	ENSMGAG00000022335	1.68199	2.91e-05	GNAO1	G protein subunit alpha o1 [Source:NCBI gene;Acc:415698] ortholog	13	protein_coding
Up	ENSMGAG00000010458	1.68072	0.00316	ANKS4B	ankyrin repeat and sterile alpha motif domain containing 4B [Source:HGNC Symbol;Acc:HGNC:26795]	16	protein_coding
Up	ENSMGAG00000010580	1.6792	0.000282	MPP6	membrane palmitoylated protein 6 [Source:HGNC Symbol;Acc:HGNC:18167]	6	protein_coding
Up	ENSMGAG00000020271	1.67809	0.00897	ENSMGAG00000020271	novel protein coding gene	KN388722.1	protein_coding
Up	ENSMGAG00000018640	1.67564	4.53e-05	FAM110C	family with sequence similarity 110 member C [Source:HGNC Symbol;Acc:HGNC:33340]	2	protein_coding
Up	ENSMGAG00000019338	1.67537	5.54e-10	ENSMGAG00000019338	novel protein coding gene	2	protein_coding
Up	ENSMGAG00000015214	1.67326	9.92e-05	DEUP1	Coiled-coil domain-containing protein 67 (Deuterosome assembly protein 1)	1	protein_coding
Up	ENSMGAG00000008777	1.67171	0.000361	NTRK3	neurotrophic receptor tyrosine kinase 3 [Source:HGNC Symbol;Acc:HGNC:8033]	12	protein_coding
Up	ENSMGAG00000002241	1.66836	0.00103	TLL1	tolloid like 1 [Source:HGNC Symbol;Acc:HGNC:11843]	4	protein_coding
Up	ENSMGAG00000010571	1.66176	0.0149	SYT13	synaptotagmin 13	5	protein_coding
Up	ENSMGAG00000003645	1.66122	9.77e-07	LOC100543305	mitotic checkpoint serine/threonine-protein kinase BUB1 beta-like	5	protein_coding
Up	ENSMGAG00000010256	1.65768	0.000426	ACSM5	acyl-CoA synthetase medium chain family member 5 [Source:HGNC Symbol;Acc:HGNC:26060]	16	protein_coding
Up	ENSMGAG00000005090	1.65523	0.0097	ZNFX1	zinc finger NFX1-type containing 1	22	protein_coding
Up	ENSMGAG00000001022	1.65008	8.83e-05	ASIC2	Acid sensing ion channel subunit 2	29	protein_coding
Up	ENSMGAG00000004889	1.64704	1.51e-05	ACTG2	actin gamma 2, smooth muscle [Source:HGNC Symbol;Acc:HGNC:145]	KN389314.1	protein_coding
Up	ENSMGAG00000015215	1.64609	0.002	LOC100549351	protocadherin Fat 3-like	1	protein_coding
Up	ENSMGAG00000001789	1.64192	2.31e-08	COL6A1	collagen type VI alpha 1 chain	7	protein_coding
Up	ENSMGAG00000011987	1.64096	0.000151	AOAH	acyloxyacyl hydrolase [Source:HGNC Symbol;Acc:HGNC:548]	6	protein_coding
Up	ENSMGAG00000001182	1.6401	3.07e-06	HMCN1	hemicentin 1	10	protein_coding
Up	ENSMGAG00000020855	1.6367	0.00246	LOC104910315	chloride channel protein C-like	3	protein_coding
Up	ENSMGAG00000002352	1.63281	0.0243	TRIM29	tripartite motif containing 29 [Source:HGNC Symbol;Acc:HGNC:17274]	26	protein_coding
Up	ENSMGAG00000003722	1.63002	5.88e-14	DBN1	drebrin 1 [Source:HGNC Symbol;Acc:HGNC:2695]	15	protein_coding
Up	ENSMGAG00000021303	1.62923	0.0487	ENSMGAG00000021303	lncRNA	11	lncRNA
Up	ENSMGAG00000014468	1.62793	2.99e-05	ROBO1	roundabout guidance receptor 1	1	protein_coding
Up	ENSMGAG00000015065	1.62722	0.000582	DCLK1	serine/threonine-protein kinase DCLK1	1	protein_coding
Up	ENSMGAG00000020964	1.62556	0.0129	ENSMGAG00000020964	novel protein coding gene	15	protein_coding
Up	ENSMGAG00000004246	1.62525	2.51e-07	PCSK4	proprotein convertase subtilisin/kexin type 4	30	protein_coding
Up	ENSMGAG00000002577	1.62431	0.00439	PI16	peptidase inhibitor 16	28	protein_coding
Up	ENSMGAG00000001791	1.62209	0.00662	ENSMGAG00000001791	SCY domain-containing protein	21	protein_coding
Up	ENSMGAG00000000981	1.61612	5.02e-05	CNTN2	contactin 2	28	protein_coding
Up	ENSMGAG00000021227	1.61538	5.63e-06	ENSMGAG00000021227	novel protein coding gene	2	protein_coding
Up	ENSMGAG00000017867	1.60965	0.000332	ENSMGAG00000017867	novel protein coding gene	1	protein_coding
Up	ENSMGAG00000019264	1.60718	0.00341	ENSMGAG00000019264	mitotic spindle positioning [Source:NCBI gene;Acc:420097] ortholog	30	protein_coding
Up	ENSMGAG00000020137	1.60494	0.00301	SEMA6B	semaphorin 6B	30	protein_coding
Up	ENSMGAG00000001307	1.6045	1.1e-06	FA2H	Fatty acid 2-hydroxylase (EC 1.-.-.-)	13	protein_coding
Up	ENSMGAG00000020811	1.60416	0.00511	ENSMGAG00000020811	novel protein coding gene	KN387925.1	protein_coding
Up	ENSMGAG00000004987	1.60275	3.7e-08	SOX30	SRY-box transcription factor 30 [Source:HGNC Symbol;Acc:HGNC:30635]	15	protein_coding
Up	ENSMGAG00000006063	1.60165	0.000481	NPTX1	neuronal pentraxin 1	20	protein_coding
Up	ENSMGAG00000002525	1.60063	0.00752	TMEM132B	transmembrane protein 132B [Source:HGNC Symbol;Acc:HGNC:29397]	17	protein_coding
Up	ENSMGAG00000007979	1.60034	0.023	TRPC7	Transient receptor potential cation channel subfamily C member 7	15	protein_coding
Up	ENSMGAG00000018284	1.59819	1.55e-08	LOC104917086	myoferlin-like	KN389314.1	protein_coding
Up	ENSMGAG00000018237	1.59625	1.1e-07	ENSMGAG00000018237	novel protein coding gene	26	protein_coding
Up	ENSMGAG00000021530	1.59232	6.1e-05	LRRC4	leucine rich repeat containing 4	ADDD02267875.1	protein_coding
Up	ENSMGAG00000015291	1.58614	1.37e-09	SERPINH1	serpin family H member 1 [Source:HGNC Symbol;Acc:HGNC:1546]	1	protein_coding
Up	ENSMGAG00000013902	1.58507	1.4e-07	COL21A1	Collagen type XXI alpha 1 chain	2	protein_coding
Up	ENSMGAG00000012039	1.58155	0.0112	LRRC7	leucine rich repeat containing 7	10	protein_coding
Up	ENSMGAG00000002691	1.57989	0.000154	ANO9	anoctamin 9 [Source:HGNC Symbol;Acc:HGNC:20679]	5	protein_coding
Up	ENSMGAG00000003945	1.57855	0.0258	PLEKHB1	pleckstrin homology domain containing B1	1	protein_coding
Up	ENSMGAG00000021353	1.57697	1.9e-06	ENSMGAG00000021353	novel protein coding gene	9	protein_coding
Up	ENSMGAG00000007837	1.57415	0.0218	LOC104913922	lysophosphatidic acid receptor 1-B-like	21	protein_coding
Up	ENSMGAG00000000660	1.5735	0.00214	GFAP	glial fibrillary acidic protein [Source:HGNC Symbol;Acc:HGNC:4235]	29	protein_coding
Up	ENSMGAG00000014151	1.57347	0.000963	CENPO	centromere protein O [Source:HGNC Symbol;Acc:HGNC:28152]	2	protein_coding
Up	ENSMGAG00000022733	1.57291	0.0159	ENSMGAG00000022733	novel protein coding gene	28	protein_coding
Up	ENSMGAG00000006394	1.57262	0.00386	DCX	doublecortin [Source:HGNC Symbol;Acc:HGNC:2714]	9	protein_coding
Up	ENSMGAG00000000854	1.57212	3.06e-06	HYLS1	HYLS1 centriolar and ciliogenesis associated [Source:HGNC Symbol;Acc:HGNC:26558]	26	protein_coding
Up	ENSMGAG00000016008	1.56666	0.00605	KCNA5	potassium voltage-gated channel subfamily A member 5 [Source:NCBI gene;Acc:395115] ortholog	1	protein_coding
Up	ENSMGAG00000005234	1.56434	0.0101	PPFIBP2	PPFIA binding protein 2	5	protein_coding
Up	ENSMGAG00000003161	1.56278	0.000442	LINGO1	leucine rich repeat and Ig domain containing 1	12	protein_coding
Up	ENSMGAG00000000654	1.56228	0.0195	ANTXR1	ANTXR cell adhesion molecule 1 [Source:HGNC Symbol;Acc:HGNC:21014]	24	protein_coding
Up	ENSMGAG00000018594	1.55492	0.00462	ENSMGAG00000018594	lncRNA	4	lncRNA
Up	ENSMGAG00000002044	1.55417	0.0178	ENSMGAG00000002044	Uncharacterized protein	28	protein_coding
Up	ENSMGAG00000019033	1.55398	0.00117	SLC3A1	solute carrier family 3 member 1 [Source:NCBI gene;Acc:428569] ortholog	ADDD02222025.1	protein_coding
Up	ENSMGAG00000019758	1.55297	0.00264	LOC104909382	protocadherin Fat 3-like [ Meleagris gallopavo (turkey) ]	1	protein_coding
Up	ENSMGAG00000008062	1.55287	0.001	LOC100545337	sulfotransferase family cytosolic 2B member 1-like	13	protein_coding
Up	ENSMGAG00000017243	1.55065	8.16e-05	ENSMGAG00000017243	Pep_M12B_propep domain-containing protein	15	protein_coding
Up	ENSMGAG00000011823	1.55063	1.63e-08	NID1	nidogen 1 [Source:HGNC Symbol;Acc:HGNC:7821]	2	protein_coding
Up	ENSMGAG00000021596	1.54963	0.00996	ENSMGAG00000021596	lncRNA	26	lncRNA
Up	ENSMGAG00000017950	1.54906	0.00161	PRNP	prion protein [Source:NCBI gene;Acc:396452] ortholog	24	protein_coding
Up	ENSMGAG00000010535	1.54897	0.0176	ASIC1	acid sensing ion channel subunit 1 [Source:HGNC Symbol;Acc:HGNC:100]	17	protein_coding
Up	ENSMGAG00000001548	1.54875	0.0263	ENSMGAG00000001548	Uncharacterized protein	19	protein_coding
Up	ENSMGAG00000020512	1.54745	0.0235	ENSMGAG00000020512	lncRNA	11	lncRNA
Up	ENSMGAG00000022189	1.54711	0.0157	ENSMGAG00000022189	novel protein coding gene	3	protein_coding
Up	ENSMGAG00000016427	1.54537	2.11e-06	ENSMGAG00000016427	Neuronal protein 3.1 (Neuronal regeneration-related protein) (Protein p311)	Z	protein_coding
Up	ENSMGAG00000003016	1.54497	0.000961	FBLN7	fibulin 7	2	protein_coding
Up	ENSMGAG00000011877	1.5446	0.00297	LNX1	ligand of numb-protein X 1 [Source:HGNC Symbol;Acc:HGNC:6657]	4	protein_coding
Up	ENSMGAG00000013272	1.54344	0.00153	PTN	pleiotrophin	1	protein_coding
Up	ENSMGAG00000009030	1.54262	0.000394	SYNPR	synaptoporin [Source:HGNC Symbol;Acc:HGNC:16507]	14	protein_coding
Up	ENSMGAG00000003905	1.5393	1.11e-08	LOC100540451	fascin-like	16	protein_coding
Up	ENSMGAG00000004723	1.53847	0.00078	LOC100545816	microtubule-associated protein 1B-like	Z	protein_coding
Up	ENSMGAG00000020144	1.53565	1.08e-05	ENSMGAG00000020144	novel protein coding gene	23	protein_coding
Up	ENSMGAG00000005075	1.53551	0.0013	DHDH	dihydrodiol dehydrogenase	KN387925.1	protein_coding
Up	ENSMGAG00000020036	1.5345	0.000134	ENSMGAG00000020036	lncRNA	23	lncRNA
Up	ENSMGAG00000002499	1.53206	0.000261	ENSMGAG00000002499	pseudogene	6	pseudogene
Up	ENSMGAG00000000941	1.53034	8.28e-06	GNAO1	G protein subunit alpha o1	13	protein_coding
Up	ENSMGAG00000019534	1.52879	0.00109	LOC104917075	zinc finger protein 501-like	KN389306.1	protein_coding
Up	ENSMGAG00000007854	1.52803	1.1e-06	GGT1	gamma-glutamyltransferase 1	17	protein_coding
Up	ENSMGAG00000022907	1.52657	3.66e-09	CKS1B	CDC28 protein kinase regulatory subunit 1B	ADDD02180415.1	protein_coding
Up	ENSMGAG00000007709	1.52567	0.00453	AKAP14	A-kinase anchoring protein 14 [Source:HGNC Symbol;Acc:HGNC:24061]	9	protein_coding
Up	ENSMGAG00000011230	1.52168	2.55e-06	ENO4	2-phospho-D-glycerate hydro-lyase (EC 4.2.1.11)	8	protein_coding
Up	ENSMGAG00000014264	1.5204	0.00539	POLQ	DNA polymerase theta [Source:HGNC Symbol;Acc:HGNC:9186]	1	protein_coding
Up	ENSMGAG00000017169	1.51758	0.000787	GCK	glucokinase	KN386979.1	protein_coding
Up	ENSMGAG00000008435	1.51327	0.00477	CRLF1	cytokine receptor like factor 1 [Source:HGNC Symbol;Acc:HGNC:2364]	30	protein_coding
Up	ENSMGAG00000015581	1.51302	0.0483	LOC100550045	toll-like receptor 13	13	protein_coding
Up	ENSMGAG00000017574	1.51081	0.00119	GPR135	G protein-coupled receptor 135 [Source:HGNC Symbol;Acc:HGNC:19991]	5	protein_coding
Up	ENSMGAG00000016999	1.50423	0.00593	ENSMGAG00000016999	KRAB domain-containing protein	KN389598.1	protein_coding
Up	ENSMGAG00000014125	1.50343	0.00086	SCARA3	scavenger receptor class A member 3 [Source:HGNC Symbol;Acc:HGNC:19000]	2	protein_coding
Up	ENSMGAG00000009973	1.50338	0.0253	NTN3	netrin 3 [Source:HGNC Symbol;Acc:HGNC:8030]	16	protein_coding
Up	ENSMGAG00000021558	1.49602	0.0162	LOC100543118	guanylate-binding protein 1-like [ Meleagris gallopavo (turkey) ]	25	protein_coding
Up	ENSMGAG00000010348	1.49595	3.67e-16	ADAMTS7	ADAM metallopeptidase with thrombospondin type 1 motif 7	12	protein_coding
Up	ENSMGAG00000021528	1.49464	0.000898	ENSMGAG00000021528	novel protein coding gene	KN387443.1	protein_coding
Up	ENSMGAG00000006387	1.49275	0.000355	PLS1	plastin 1 [Source:HGNC Symbol;Acc:HGNC:9090]	11	protein_coding
Up	ENSMGAG00000012005	1.4905	0.0475	CDH17	cadherin 17 [Source:HGNC Symbol;Acc:HGNC:1756]	3	protein_coding
Up	ENSMGAG00000018957	1.48569	0.000386	ENSMGAG00000018957	novel protein coding gene	ADDD02185152.1	protein_coding
Up	ENSMGAG00000010318	1.4853	0.000352	CD44	CD44 molecule (Indian blood group) [Source:HGNC Symbol;Acc:HGNC:1681]	5	protein_coding
Up	ENSMGAG00000014059	1.48267	3.49e-05	PFN4	profilin family member 4 [Source:HGNC Symbol;Acc:HGNC:31103]	2	protein_coding
Up	ENSMGAG00000010203	1.48219	0.00243	KAZALD1	Kazal type serine peptidase inhibitor domain 1 [Source:HGNC Symbol;Acc:HGNC:25460]	8	protein_coding
Up	ENSMGAG00000001719	1.48154	2.43e-07	COL6A2	collagen type VI alpha 2 chain [Source:HGNC Symbol;Acc:HGNC:2212]	7	protein_coding
Up	ENSMGAG00000022260	1.47512	0.0284	ENSMGAG00000022260	novel protein coding gene	11	protein_coding
Up	ENSMGAG00000005928	1.47452	0.0293	KIF14	kinesin family member 14	10	protein_coding
Up	ENSMGAG00000012108	1.4745	0.0125	CAPN9	calpain 9 [Source:HGNC Symbol;Acc:HGNC:1486]	2	protein_coding
Up	ENSMGAG00000017620	1.47354	0.00205	ENSMGAG00000017620	novel protein coding gene	1	protein_coding
Up	ENSMGAG00000012881	1.47127	2.3e-08	DYNLT1	dynein light chain Tctex-type 1 [Source:HGNC Symbol;Acc:HGNC:11697]	2	protein_coding
Up	ENSMGAG00000019120	1.47037	3.55e-05	ENSMGAG00000019120	novel protein coding gene	23	protein_coding
Up	ENSMGAG00000021972	1.46996	0.0114	ENSMGAG00000021972	novel protein coding gene	KN389129.1	protein_coding
Up	ENSMGAG00000014020	1.46878	0.00039	LOC100539136	protein GREB1	2	protein_coding
Up	ENSMGAG00000000864	1.46841	0.00464	LOC100550755	probable G-protein coupled receptor 83	9	protein_coding
Up	ENSMGAG00000011591	1.46816	0.0257	LOC100546647	photoreceptor outer segment membrane glycoprotein 2	5	protein_coding
Up	ENSMGAG00000009820	1.46806	0.000272	NEK2	NIMA related kinase 2 [Source:HGNC Symbol;Acc:HGNC:7745]	2	protein_coding
Up	ENSMGAG00000019424	1.46655	0.00603	ENSMGAG00000019424	novel protein coding gene	4	protein_coding
Up	ENSMGAG00000016159	1.46646	6.83e-05	GPR1	G protein-coupled receptor 1 [Source:HGNC Symbol;Acc:HGNC:4463]	7	protein_coding
Up	ENSMGAG00000002066	1.46354	4.03e-05	LOC100550363	alpha-1,3-mannosyl-glycoprotein 4-beta-N-acetylglucosaminyltransferase C	28	protein_coding
Up	ENSMGAG00000005076	1.46344	0.00225	ENSMGAG00000005076	pseudogene	5	pseudogene
Up	ENSMGAG00000007642	1.46199	3.36e-05	FBLIM1	filamin binding LIM protein 1	23	protein_coding
Up	ENSMGAG00000003641	1.46114	3.24e-08	BARD1	BRCA1 associated RING domain 1 [Source:HGNC Symbol;Acc:HGNC:952]	7	protein_coding
Up	ENSMGAG00000011232	1.46019	7.76e-14	TMEM198	transmembrane protein 198 [Source:HGNC Symbol;Acc:HGNC:33704]	7	protein_coding
Up	ENSMGAG00000013294	1.45989	0.0113	PTGFRN	prostaglandin F2 receptor inhibitor	1	protein_coding
Up	ENSMGAG00000018532	1.45928	0.0476	PKIB	cAMP-dependent protein kinase inhibitor beta [Source:HGNC Symbol;Acc:HGNC:9018]	2	protein_coding
Up	ENSMGAG00000004689	1.45739	0.000216	TOX3	TOX high mobility group box family member 3	13	protein_coding
Up	ENSMGAG00000022620	1.45656	0.0492	ENSMGAG00000022620	lncRNA	3	lncRNA
Up	ENSMGAG00000005785	1.45413	0.0184	SYCP1	synaptonemal complex protein 1 [Source:HGNC Symbol;Acc:HGNC:11487]	28	protein_coding
Up	ENSMGAG00000001535	1.45362	1.08e-07	LOC100547499	digestive cysteine proteinase 1-like	25	protein_coding
Up	ENSMGAG00000008751	1.45353	0.0211	ICOS	inducible T cell costimulator [Source:HGNC Symbol;Acc:HGNC:5351]	7	protein_coding
Up	ENSMGAG00000005496	1.45172	8.41e-06	RNF186	ring finger protein 186 [Source:HGNC Symbol;Acc:HGNC:25978]	23	protein_coding
Up	ENSMGAG00000000195	1.45162	0.00597	MIR147-1	Gallus gallus microRNA 147-1 (MIR147-1)	12	miRNA
Up	ENSMGAG00000003314	1.44916	0.00341	Rnf223	ring finger protein 223	23	protein_coding
Up	ENSMGAG00000019671	1.44685	2.42e-05	CNGA4	cyclic nucleotide-gated cation channel alpha-4	1	protein_coding
Up	ENSMGAG00000017362	1.44575	0.000137	P2RY6	pyrimidinergic receptor P2Y6	1	protein_coding
Up	ENSMGAG00000021258	1.44541	0.0355	LOC100539476	CMRF35-like molecule 2	20	protein_coding
Up	ENSMGAG00000013171	1.44324	0.0201	ASB2	ankyrin repeat and SOCS box containing 2 [Source:HGNC Symbol;Acc:HGNC:16012]	5	protein_coding
Up	ENSMGAG00000006752	1.44233	0.00239	DHX58	DExH-box helicase 58 [Source:HGNC Symbol;Acc:HGNC:29517]	29	protein_coding
Up	ENSMGAG00000012062	1.44149	0.000867	BMPER	BMP binding endothelial regulator [Source:HGNC Symbol;Acc:HGNC:24154]	6	protein_coding
Up	ENSMGAG00000010590	1.43911	0.000549	LOC100545010	meprin A subunit beta	3	protein_coding
Up	ENSMGAG00000014283	1.43812	0.000194	FSTL1	follistatin like 1 [Source:HGNC Symbol;Acc:HGNC:3972]	1	protein_coding
Up	ENSMGAG00000021180	1.43591	0.0155	LOC104910451	guanylate-binding protein 1-like [ Meleagris gallopavo (turkey) ]	3	protein_coding
Up	ENSMGAG00000019853	1.43585	0.000247	ENSMGAG00000019853	novel protein coding gene	5	protein_coding
Up	ENSMGAG00000005341	1.43561	0.00108	SOX8	SRY-box 8	16	protein_coding
Up	ENSMGAG00000014119	1.43501	5.49e-05	SCARA5	scavenger receptor class A member 5 [Source:HGNC Symbol;Acc:HGNC:28701]	2	protein_coding
Up	ENSMGAG00000012574	1.43376	5.47e-06	FAM184B	family with sequence similarity 184 member B [Source:HGNC Symbol;Acc:HGNC:29235]	4	protein_coding
Up	ENSMGAG00000021677	1.43185	0.0481	LOC104915703	zinc finger protein 501-like	KN386802.1	protein_coding
Up	ENSMGAG00000007247	1.43089	0.000572	ENSMGAG00000007247	Uncharacterized protein	7	protein_coding
Up	ENSMGAG00000022703	1.43073	0.000641	LOC104910021	uncharacterized LOC104910021	2	protein_coding
Up	ENSMGAG00000016901	1.43072	0.0123	PARP15	poly (ADP-ribose) polymerase family member 15	7	protein_coding
Up	ENSMGAG00000013242	1.4294	0.034	WEE2	WEE1 homolog 2	1	protein_coding
Up	ENSMGAG00000013267	1.42857	9.6e-05	ADAM33	ADAM metallopeptidase domain 33	4	protein_coding
Up	ENSMGAG00000004212	1.42799	0.0003	PLXNA2	plexin A2	28	protein_coding
Up	ENSMGAG00000018796	1.42741	0.0331	LOC100544297	ras-related protein Rab-3B-like	10	protein_coding
Up	ENSMGAG00000018279	1.42575	0.00284	ENSMGAG00000018279	lncRNA	26	lncRNA
Up	ENSMGAG00000004451	1.42568	0.0209	CDK3	cyclin dependent kinase 3 [Source:HGNC Symbol;Acc:HGNC:1772]	20	protein_coding
Up	ENSMGAG00000002224	1.424	4.04e-05	CPE	carboxypeptidase E [Source:HGNC Symbol;Acc:HGNC:2303]	4	protein_coding
Up	ENSMGAG00000019122	1.42219	0.00953	DMB1	HLA class II histocompatibility antigen, DM beta chain	18	protein_coding
Up	ENSMGAG00000012787	1.42001	0.0124	NOX3	NADPH oxidase 3 [Source:HGNC Symbol;Acc:HGNC:7890]	2	protein_coding
Up	ENSMGAG00000010900	1.41943	1.17e-05	ar	androgen receptor	9	protein_coding
Up	ENSMGAG00000007037	1.41586	2.13e-07	ENSMGAG00000007037	Uncharacterized protein	21	protein_coding
Up	ENSMGAG00000016387	1.41572	0.00429	PTPRD	protein tyrosine phosphatase receptor type D [Source:HGNC Symbol;Acc:HGNC:9668]	Z	protein_coding
Up	ENSMGAG00000011179	1.41168	0.000675	EXD1	exonuclease 3'-5' domain containing 1	5	protein_coding
Up	ENSMGAG00000014150	1.41115	0.000917	C1S	complement C1s	1	protein_coding
Up	ENSMGAG00000022754	1.40646	0.0187	ENSMGAG00000022754	filamin-A-like	ADDD02212084.1	protein_coding
Up	ENSMGAG00000017947	1.40553	2.53e-06	ENSMGAG00000017947	novel protein coding gene	1	protein_coding
Up	ENSMGAG00000003847	1.40412	8.45e-10	CPS1	carbamoyl-phosphate synthase 1 [Source:HGNC Symbol;Acc:HGNC:2323]	7	protein_coding
Up	ENSMGAG00000010943	1.40372	0.00519	E2F7	E2F transcription factor 7 [Source:HGNC Symbol;Acc:HGNC:23820]	1	protein_coding
Up	ENSMGAG00000005771	1.4024	0.00557	TK1	thymidine kinase 1	20	protein_coding
Up	ENSMGAG00000013275	1.40021	0.0113	COL8A1	Collagen type VIII alpha 1 chain	1	protein_coding
Up	ENSMGAG00000004333	1.39996	4.82e-05	ITIH2	inter-alpha-trypsin inhibitor heavy chain 2 [Source:HGNC Symbol;Acc:HGNC:6167]	1	protein_coding
Up	ENSMGAG00000020187	1.39934	0.0221	ENSMGAG00000020187	novel protein coding gene	21	protein_coding
Up	ENSMGAG00000010829	1.39841	0.00626	SLC5A9	solute carrier family 5 member 9	10	protein_coding
Up	ENSMGAG00000012882	1.39443	0.000361	HTRA3	HtrA serine peptidase 3 [Source:HGNC Symbol;Acc:HGNC:30406]	4	protein_coding
Up	ENSMGAG00000019330	1.39009	0.00811	ENSMGAG00000019330	novel protein coding gene	ADDD02173724.1	protein_coding
Up	ENSMGAG00000008857	1.38972	2.81e-05	CEP55	centrosomal protein 55 [Source:HGNC Symbol;Acc:HGNC:1161]	8	protein_coding
Up	ENSMGAG00000022102	1.38876	0.00231	ENSMGAG00000022102	novel protein coding gene	10	protein_coding
Up	ENSMGAG00000006890	1.38836	0.029	ENSMGAG00000006890	Uncharacterized protein	28	protein_coding
Up	ENSMGAG00000008066	1.3869	2.18e-05	LOC104909274	rhabdoid tumor deletion region protein 1-like	17	protein_coding
Up	ENSMGAG00000001215	1.38672	0.000119	CDC45	cell division cycle 45	17	protein_coding
Up	ENSMGAG00000017636	1.38441	0.0132	ENSMGAG00000017636	novel protein coding gene	11	protein_coding
Up	ENSMGAG00000009126	1.38425	0.000609	F8	coagulation factor VIII [Source:HGNC Symbol;Acc:HGNC:3546]	9	protein_coding
Up	ENSMGAG00000002113	1.3805	6.53e-05	SLIT3	slit guidance ligand 3 [Source:HGNC Symbol;Acc:HGNC:11087]	15	protein_coding
Up	ENSMGAG00000006373	1.37795	0.00173	NRIP3	nuclear receptor interacting protein 3 [Source:HGNC Symbol;Acc:HGNC:1167]	5	protein_coding
Up	ENSMGAG00000011279	1.37501	1.23e-05	LUM	lumican [Source:HGNC Symbol;Acc:HGNC:6724]	1	protein_coding
Up	ENSMGAG00000021670	1.37495	1.22e-07	LAMA1	laminin subunit alpha 1	3	protein_coding
Up	ENSMGAG00000011982	1.37424	0.0475	SLC15A2	solute carrier family 15 member 2	7	protein_coding
Up	ENSMGAG00000021214	1.37271	0.038	ENSMGAG00000021214	C-C motif chemokine ligand 26 [Source:NCBI gene;Acc:417534] ortholog	21	protein_coding
Up	ENSMGAG00000005852	1.37267	3.85e-05	RAB34	RAB34, member RAS oncogene family [Source:HGNC Symbol;Acc:HGNC:16519]	21	protein_coding
Up	ENSMGAG00000001747	1.37174	0.00267	GASK1B	golgi associated kinase 1B [Source:HGNC Symbol;Acc:HGNC:25312]	4	protein_coding
Up	ENSMGAG00000013393	1.37107	0.00207	EXOC3L4	exocyst complex component 3 like 4 [Source:HGNC Symbol;Acc:HGNC:20120]	5	protein_coding
Up	ENSMGAG00000009291	1.37097	0.0206	TMEM35A	transmembrane protein 35A	9	protein_coding
Up	ENSMGAG00000017370	1.37082	0.000316	ENSMGAG00000017370	Uncharacterized protein	KN387264.1	protein_coding
Up	ENSMGAG00000018568	1.36907	0.00143	ENSMGAG00000018568	lncRNA	16	lncRNA
Up	ENSMGAG00000004261	1.36837	0.0186	SRPX2	sushi repeat containing protein X-linked 2 [Source:HGNC Symbol;Acc:HGNC:30668]	9	protein_coding
Up	ENSMGAG00000010933	1.3674	0.0197	GCG	glucagon	7	protein_coding
Up	ENSMGAG00000007186	1.36618	0.00144	PRR11	proline rich 11	21	protein_coding
Up	ENSMGAG00000001070	1.36348	0.000595	ENTPD2	ectonucleoside triphosphate diphosphohydrolase 2 [Source:HGNC Symbol;Acc:HGNC:3364]	19	protein_coding
Up	ENSMGAG00000002855	1.36282	0.00742	ENSMGAG00000002855	Uncharacterized protein	12	protein_coding
Up	ENSMGAG00000004601	1.36227	0.000586	CALCRL	calcitonin receptor like receptor [Source:HGNC Symbol;Acc:HGNC:16709]	7	protein_coding
Up	ENSMGAG00000010795	1.36062	2.55e-06	STIL	STIL centriolar assembly protein	10	protein_coding
Up	ENSMGAG00000019624	1.3599	0.00177	ENSMGAG00000019624	novel protein coding gene	12	protein_coding
Up	ENSMGAG00000020899	1.35923	0.00285	CENPW	centromere protein W	2	protein_coding
Up	ENSMGAG00000015836	1.35848	2.86e-05	FAM110B	family with sequence similarity 110 member B [Source:HGNC Symbol;Acc:HGNC:28587]	3	protein_coding
Up	ENSMGAG00000013577	1.35763	0.0029	PIK3C2G	Phosphatidylinositol-4-phosphate 3-kinase (EC 2.7.1.154)	1	protein_coding
Up	ENSMGAG00000008218	1.35721	0.006	FANCA	Fanconi anemia complementation group A	13	protein_coding
Up	ENSMGAG00000009985	1.35677	1.27e-07	ENSMGAG00000009985	Fibronectin type-III domain-containing protein	16	protein_coding
Up	ENSMGAG00000003988	1.35545	0.0184	XDH	xanthine dehydrogenase	KN389410.1	protein_coding
Up	ENSMGAG00000022131	1.35431	3.66e-07	LOC104915967	transmembrane protein 198-like [ Meleagris gallopavo (turkey) ]	KN387451.1	protein_coding
Up	ENSMGAG00000002027	1.35364	0.0026	PKP1	plakophilin 1 [Source:HGNC Symbol;Acc:HGNC:9023]	28	protein_coding
Up	ENSMGAG00000002576	1.35362	0.00638	TRIM63	tripartite motif containing 63 [Source:HGNC Symbol;Acc:HGNC:16007]	25	protein_coding
Up	ENSMGAG00000001282	1.35327	0.00507	ADAMTS15	ADAM metallopeptidase with thrombospondin type 1 motif 15 [Source:HGNC Symbol;Acc:HGNC:16305]	26	protein_coding
Up	ENSMGAG00000006560	1.35312	7.52e-09	P2RX5	purinergic receptor P2X 5	21	protein_coding
Up	ENSMGAG00000009771	1.35106	0.00846	METRN	meteorin, glial cell differentiation regulator [Source:HGNC Symbol;Acc:HGNC:14151]	16	protein_coding
Up	ENSMGAG00000002881	1.35024	0.0114	CPNE2	copine 2	13	protein_coding
Up	ENSMGAG00000011006	1.34992	0.0159	SYT1	synaptotagmin 1 [Source:HGNC Symbol;Acc:HGNC:11509]	1	protein_coding
Up	ENSMGAG00000016208	1.3497	0.00191	ENSMGAG00000016208	Uncharacterized protein	ADDD02174405.1	protein_coding
Up	ENSMGAG00000001249	1.34883	0.00021	MND1	meiotic nuclear divisions 1 [Source:HGNC Symbol;Acc:HGNC:24839]	4	protein_coding
Up	ENSMGAG00000013115	1.34873	0.0196	LOC104911571	thromboxane-A synthase-like	1	protein_coding
Up	ENSMGAG00000011608	1.34829	0.0111	ENSMGAG00000011608	Interleukin-7	3	protein_coding
Up	ENSMGAG00000002998	1.3475	0.00281	RAD51	RAD51 recombinase	5	protein_coding
Up	ENSMGAG00000015595	1.34542	0.000315	MYADM	myeloid associated differentiation marker	16	protein_coding
Up	ENSMGAG00000022044	1.34516	0.00165	CTXN1	cortexin 1	30	protein_coding
Up	ENSMGAG00000019250	1.34418	0.0122	EPHA4	EPH receptor A4 [Source:NCBI gene;Acc:395559] ortholog	11	protein_coding
Up	ENSMGAG00000007632	1.34365	0.0246	TMEM82	transmembrane protein 82	23	protein_coding
Up	ENSMGAG00000011581	1.34362	0.0389	RUFY4	RUN and FYVE domain containing 4	7	protein_coding
Up	ENSMGAG00000017693	1.34357	0.000142	ENSMGAG00000017693	novel protein coding gene	ADDD02089473.1	protein_coding
Up	ENSMGAG00000015120	1.34263	0.00959	SGCG	sarcoglycan gamma	1	protein_coding
Up	ENSMGAG00000005290	1.34205	0.0115	OVCH2	ovochymase 2 [Source:HGNC Symbol;Acc:HGNC:29970]	5	protein_coding
Up	ENSMGAG00000022489	1.34112	0.00861	NTN1	netrin 1 [Source:HGNC Symbol;Acc:HGNC:8029]	20	protein_coding
Up	ENSMGAG00000014220	1.34094	0.00626	ENSMGAG00000014220	Beta-defensin	2	protein_coding
Up	ENSMGAG00000016070	1.33851	1.37e-06	ADAMTSL1	ADAMTS like 1 [Source:HGNC Symbol;Acc:HGNC:14632]	Z	protein_coding
Up	ENSMGAG00000004772	1.33671	2.43e-05	ENSMGAG00000004772	VIT domain-containing protein	26	protein_coding
Up	ENSMGAG00000017267	1.33589	1.41e-05	KRTCAP3	keratinocyte associated protein 3 [Source:HGNC Symbol;Acc:HGNC:28943]	2	protein_coding
Up	ENSMGAG00000012324	1.33358	0.000361	MARCO	macrophage receptor with collagenous structure	7	protein_coding
Up	ENSMGAG00000014103	1.33308	0.0221	PIANP	PILR alpha associated neural protein	1	protein_coding
Up	ENSMGAG00000019121	1.33224	0.00626	SCN3A	sodium voltage-gated channel alpha subunit 3 [Source:NCBI gene;Acc:424180] ortholog	7	protein_coding
Up	ENSMGAG00000019528	1.33189	0.00492	ENSMGAG00000019528	lncRNA	4	lncRNA
Up	ENSMGAG00000020405	1.33056	0.00174	LOC100538736	triggering receptor expressed on myeloid cells 2-like	28	protein_coding
Up	ENSMGAG00000019495	1.32918	0.000448	LOC100546659	caltractin-like	9	protein_coding
Up	ENSMGAG00000003041	1.32901	0.013	TNFSF8	TNF superfamily member 8 [Source:HGNC Symbol;Acc:HGNC:11938]	19	protein_coding
Up	ENSMGAG00000006110	1.32896	0.00315	LOC100538725	carboxymethylenebutenolidase homolog	3	protein_coding
Up	ENSMGAG00000022013	1.32836	0.00102	ENSMGAG00000022013	lncRNA	2	lncRNA
Up	ENSMGAG00000005262	1.32492	1.64e-05	CCNB2	cyclin B2 [Source:HGNC Symbol;Acc:HGNC:1580]	12	protein_coding
Up	ENSMGAG00000022150	1.32447	0.00477	CHTF8	chromosome transmission fidelity factor 8	13	protein_coding
Up	ENSMGAG00000012453	1.32372	0.00534	EGLN3	egl-9 family hypoxia inducible factor 3 [Source:HGNC Symbol;Acc:HGNC:14661]	5	protein_coding
Up	ENSMGAG00000006638	1.32352	0.00539	SOX9	SRY-box 9	20	protein_coding
Up	ENSMGAG00000014155	1.32218	0.00406	ZNF395	zinc finger protein 395 [Source:HGNC Symbol;Acc:HGNC:18737]	2	protein_coding
Up	ENSMGAG00000005711	1.32123	0.0329	LOC100544277	follicle-stimulating hormone receptor-like	2	protein_coding
Up	ENSMGAG00000017728	1.31868	2.18e-06	ENSMGAG00000017728	novel protein coding gene	KN389285.1	protein_coding
Up	ENSMGAG00000005049	1.31862	0.0361	FNDC5	fibronectin type III domain containing 5 [Source:HGNC Symbol;Acc:HGNC:20240]	25	protein_coding
Up	ENSMGAG00000007449	1.31638	0.0252	CLDN16	claudin 16 [Source:HGNC Symbol;Acc:HGNC:2037]	11	protein_coding
Up	ENSMGAG00000014011	1.31591	5.01e-13	ODC1	ornithine decarboxylase 1	2	protein_coding
Up	ENSMGAG00000000634	1.31022	0.00418	C3	complement C3	KN389463.1	protein_coding
Up	ENSMGAG00000009861	1.30916	0.000367	INCENP	inner centromere protein	5	protein_coding
Up	ENSMGAG00000007845	1.30646	9.52e-11	LOC100544408	cytochrome b-245 light chain	13	protein_coding
Up	ENSMGAG00000020018	1.30631	0.0189	ENSMGAG00000020018	lncRNA	28	lncRNA
Up	ENSMGAG00000006631	1.30532	0.000548	COL4A6	collagen type IV alpha 6 chain [Source:HGNC Symbol;Acc:HGNC:2208]	9	protein_coding
Up	ENSMGAG00000001706	1.30532	0.0445	B3GAT1	beta-1,3-glucuronyltransferase 1 [Source:HGNC Symbol;Acc:HGNC:921]	26	protein_coding
Up	ENSMGAG00000013066	1.30453	0.0104	IGF1	insulin like growth factor 1 [Source:HGNC Symbol;Acc:HGNC:5464]	1	protein_coding
Up	ENSMGAG00000008042	1.30199	0.0303	CPNE7	copine 7	13	protein_coding
Up	ENSMGAG00000020179	1.3013	0.000789	LHFPL6	LHFPL tetraspan subfamily member 6 [Source:HGNC Symbol;Acc:HGNC:6586]	1	protein_coding
Up	ENSMGAG00000003803	1.3011	0.0383	PLXNA4	plexin A4	1	protein_coding
Up	ENSMGAG00000015810	1.29873	8.29e-05	LOC104912180	uncharacterized protein CXorf21 homolog	9	protein_coding
Up	ENSMGAG00000008773	1.29853	0.00858	CACNA1G	calcium voltage-gated channel subunit alpha1 G [Source:HGNC Symbol;Acc:HGNC:1394]	20	protein_coding
Up	ENSMGAG00000010989	1.29843	0.00798	LOC100550690	kinesin-like protein KIF20A	3	protein_coding
Up	ENSMGAG00000015732	1.2983	0.000656	TBXA2R	thromboxane A2 receptor [Source:HGNC Symbol;Acc:HGNC:11608]	30	protein_coding
Up	ENSMGAG00000009700	1.29735	0.00719	NDC80	NDC80 kinetochore complex component	3	protein_coding
Up	ENSMGAG00000010457	1.29548	0.000398	PLB1	Lysophospholipase (EC 3.1.1.3) (EC 3.1.1.4) (EC 3.1.1.5) (Phospholipase A2) (Phospholipase B/lipase) (Phospholipase B1, membrane-associated) (Triacylglycerol lipase)	2	protein_coding
Up	ENSMGAG00000019447	1.29484	0.0118	ENSMGAG00000019447	novel protein coding gene	KN389301.1	protein_coding
Up	ENSMGAG00000018269	1.29372	0.0002	ENSMGAG00000018269	CD55 molecule (Cromer blood group) [Source:NCBI gene;Acc:419852] ortholog	28	protein_coding
Up	ENSMGAG00000010767	1.29171	0.00903	CSRNP3	cysteine and serine rich nuclear protein 3	7	protein_coding
Up	ENSMGAG00000005500	1.29159	9.45e-05	GLOD5	glyoxalase domain containing 5	9	protein_coding
Up	ENSMGAG00000003106	1.29084	0.000149	USP43	ubiquitin specific peptidase 43 [Source:HGNC Symbol;Acc:HGNC:20072]	20	protein_coding
Up	ENSMGAG00000005381	1.28857	1.08e-06	FBLN2	fibulin 2 [Source:HGNC Symbol;Acc:HGNC:3601]	14	protein_coding
Up	ENSMGAG00000003647	1.28653	1.3e-05	GRIN3B	Glutamate receptor	30	protein_coding
Up	ENSMGAG00000002851	1.2855	8.41e-05	IGFBP4	Insulin like growth factor binding protein 4	29	protein_coding
Up	ENSMGAG00000015604	1.28425	0.00279	SHISA2	Shisa family member 2	1	protein_coding
Up	ENSMGAG00000018592	1.28411	0.00207	SGCD	sarcoglycan delta [Source:HGNC Symbol;Acc:HGNC:10807]	15	protein_coding
Up	ENSMGAG00000020499	1.28367	0.0432	ENSMGAG00000020499	lncRNA	1	lncRNA
Up	ENSMGAG00000013786	1.28356	2.61e-05	NID2	nidogen 2 [Source:HGNC Symbol;Acc:HGNC:13389]	5	protein_coding
Up	ENSMGAG00000005332	1.28338	1.5e-06	UBE2T	ubiquitin conjugating enzyme E2 T	28	protein_coding
Up	ENSMGAG00000014730	1.28217	0.00227	MXRA5	matrix remodeling associated 5 [Source:HGNC Symbol;Acc:HGNC:7539]	1	protein_coding
Up	ENSMGAG00000003876	1.28087	4.64e-05	GPR157	G protein-coupled receptor 157 [Source:HGNC Symbol;Acc:HGNC:23687]	23	protein_coding
Up	ENSMGAG00000022603	1.28036	0.0142	LOC104914976	putative ankyrin repeat domain-containing protein 31	Z	protein_coding
Up	ENSMGAG00000008943	1.28019	0.037	ENSMGAG00000008943	Piezo-type mechanosensitive ion channel component	3	protein_coding
Up	ENSMGAG00000013858	1.27696	2.12e-05	LOC104912467	cyclin-dependent kinase inhibitor 1-like	1	protein_coding
Up	ENSMGAG00000015055	1.27583	0.00575	ENSMGAG00000015055	KRAB domain-containing protein	KN389536.1	protein_coding
Up	ENSMGAG00000008949	1.27472	0.00074	ST8SIA2	ST8 alpha-N-acetyl-neuraminide alpha-2,8-sialyltransferase 2 [Source:HGNC Symbol;Acc:HGNC:10870]	12	protein_coding
Up	ENSMGAG00000002554	1.27433	0.00553	B4GALNT4	beta-1,4-N-acetyl-galactosaminyltransferase 4 [Source:HGNC Symbol;Acc:HGNC:26315]	5	protein_coding
Up	ENSMGAG00000001559	1.27402	0.024	HAUS1	HAUS augmin like complex subunit 1 [Source:HGNC Symbol;Acc:HGNC:25174]	Z	protein_coding
Up	ENSMGAG00000007944	1.27084	0.0165	FBN2	fibrillin 2 [Source:HGNC Symbol;Acc:HGNC:3604]	Z	protein_coding
Up	ENSMGAG00000020258	1.2706	0.000422	LOC104913214	protocadherin beta-15-like	15	protein_coding
Up	ENSMGAG00000003939	1.26943	0.000356	F13A1	coagulation factor XIII A chain [Source:HGNC Symbol;Acc:HGNC:3531]	3	protein_coding
Up	ENSMGAG00000013476	1.26778	7.69e-06	CEP57L1	centrosomal protein 57 like 1 [Source:HGNC Symbol;Acc:HGNC:21561]	2	protein_coding
Up	ENSMGAG00000020142	1.26761	0.000354	INAVA	innate immunity activator [ Meleagris gallopavo (turkey) ]	KN387089.1	protein_coding
Up	ENSMGAG00000006856	1.26622	0.000191	PDGFRB	platelet derived growth factor receptor beta	15	protein_coding
Up	ENSMGAG00000021108	1.26554	0.0125	TNS4	tensin 4 [Source:HGNC Symbol;Acc:HGNC:24352]	29	protein_coding
Up	ENSMGAG00000002529	1.25948	3.79e-09	IFITM5	interferon induced transmembrane protein 5 [Source:HGNC Symbol;Acc:HGNC:16644]	5	protein_coding
Up	ENSMGAG00000006123	1.25892	0.00255	LOC100546979	solute carrier family 17 member 9-like	22	protein_coding
Up	ENSMGAG00000007888	1.25613	0.000365	LOC100551374	deoxyribodipyrimidine photo-lyase-like	11	protein_coding
Up	ENSMGAG00000003450	1.25528	0.00268	BOK	BCL2 family apoptosis regulator BOK [Source:HGNC Symbol;Acc:HGNC:1087]	11	protein_coding
Up	ENSMGAG00000007735	1.25523	1.21e-06	VIM	Vimentin	6	protein_coding
Up	ENSMGAG00000001643	1.25439	0.00088	NPTX2	Neuronal pentraxin 2	16	protein_coding
Up	ENSMGAG00000001858	1.25141	0.00922	GABRP	gamma-aminobutyric acid type A receptor subunit pi	15	protein_coding
Up	ENSMGAG00000000917	1.25033	0.0047	B3GNT9	UDP-GlcNAc:betaGal beta-1,3-N-acetylglucosaminyltransferase 9	13	protein_coding
Up	ENSMGAG00000022393	1.24686	0.00354	ENSMGAG00000022393	novel protein coding gene	Z	protein_coding
Up	ENSMGAG00000008058	1.24619	0.00955	ARHGAP22	Rho GTPase activating protein 22 [Source:HGNC Symbol;Acc:HGNC:30320]	8	protein_coding
Up	ENSMGAG00000002923	1.24597	0.00217	C1QTNF2	C1q and TNF related 2 [Source:HGNC Symbol;Acc:HGNC:14325]	15	protein_coding
Up	ENSMGAG00000001404	1.24553	0.00273	ENSMGAG00000001404	pseudogene	4	pseudogene
Up	ENSMGAG00000012627	1.24511	1.66e-05	BBOF1	basal body orientation factor 1 [Source:HGNC Symbol;Acc:HGNC:19855]	5	protein_coding
Up	ENSMGAG00000020346	1.24423	0.00041	PHETA1	PH domain containing endocytic trafficking adaptor 1 [Source:HGNC Symbol;Acc:HGNC:26509]	17	protein_coding
Up	ENSMGAG00000012419	1.242	0.000247	TMEM74	transmembrane protein 74	3	protein_coding
Up	ENSMGAG00000002809	1.23959	0.00756	PAQR7	progestin and adipoQ receptor family member 7	25	protein_coding
Up	ENSMGAG00000003486	1.2389	0.0184	DGKG	diacylglycerol kinase beta	11	protein_coding
Up	ENSMGAG00000018227	1.23884	0.0243	MAP1B	microtubule associated protein 1B [Source:NCBI gene;Acc:396174] ortholog	Z	protein_coding
Up	ENSMGAG00000009626	1.23796	0.00561	EMILIN2	elastin microfibril interfacer 2	3	protein_coding
Up	ENSMGAG00000012558	1.23568	0.0496	ENSMGAG00000012558	Uncharacterized protein	7	protein_coding
Up	ENSMGAG00000014229	1.23474	1.63e-05	MCM3	minichromosome maintenance complex component 3	2	protein_coding
Up	ENSMGAG00000007263	1.23333	0.0106	GINS1	GINS complex subunit 1	2	protein_coding
Up	ENSMGAG00000012382	1.23172	0.0206	ANGPT1	Angiopoietin-1	3	protein_coding
Up	ENSMGAG00000005025	1.2294	0.000202	NOS1AP	nitric oxide synthase 1 adaptor protein	10	protein_coding
Up	ENSMGAG00000001590	1.22835	0.017	ENSMGAG00000001590	Uncharacterized protein	6	protein_coding
Up	ENSMGAG00000001812	1.22477	0.0149	LOC100546874	cytochrome P450 2W1-like	16	protein_coding
Up	ENSMGAG00000020458	1.22414	0.0163	ENSMGAG00000020458	novel protein coding gene	ADDD02273997.1	protein_coding
Up	ENSMGAG00000002865	1.22376	0.0184	ENSMGAG00000002865	pseudogene	12	pseudogene
Up	ENSMGAG00000010366	1.22324	1.08e-06	HPDL	4-hydroxyphenylpyruvate dioxygenase like	10	protein_coding
Up	ENSMGAG00000000727	1.22083	0.0442	PROM2	prominin 2	24	protein_coding
Up	ENSMGAG00000002287	1.22	3.96e-05	CFAP45	Cilia and flagella associated protein 45	27	protein_coding
Up	ENSMGAG00000008303	1.21956	0.0408	C17orf67	chromosome 17 open reading frame 67 [Source:HGNC Symbol;Acc:HGNC:27900]	20	protein_coding
Up	ENSMGAG00000002395	1.21929	0.000121	C1QTNF5	C1q and TNF related 5 [Source:HGNC Symbol;Acc:HGNC:14344]	26	protein_coding
Up	ENSMGAG00000000690	1.21924	2.51e-08	KIF18B	kinesin family member 18B [Source:HGNC Symbol;Acc:HGNC:27102]	29	protein_coding
Up	ENSMGAG00000009977	1.21917	0.00657	TESC	tescalcin	17	protein_coding
Up	ENSMGAG00000016698	1.21894	0.00542	LOC100551284	receptor-type tyrosine-protein phosphatase F-like	Z	protein_coding
Up	ENSMGAG00000014620	1.21761	3.59e-06	SRPX	sushi repeat containing protein X-linked [Source:HGNC Symbol;Acc:HGNC:11309]	1	protein_coding
Up	ENSMGAG00000014346	1.21747	2.58e-07	CCDC181	coiled-coil domain containing 181 [Source:HGNC Symbol;Acc:HGNC:28051]	1	protein_coding
Up	ENSMGAG00000001541	1.21457	0.0192	S100B	S100 calcium binding protein B [Source:HGNC Symbol;Acc:HGNC:10500]	7	protein_coding
Up	ENSMGAG00000010895	1.21416	0.0021	LOC100547273	prolyl endopeptidase FAP	7	protein_coding
Up	ENSMGAG00000008469	1.21362	0.00315	ENSMGAG00000008469	SMC_N domain-containing protein	Z	protein_coding
Up	ENSMGAG00000017868	1.21129	2.64e-08	LOC100551205	dispanin subfamily A member 2b-like	5	protein_coding
Up	ENSMGAG00000021733	1.21015	0.000845	PXYLP1	2-phosphoxylose phosphatase 1 [Source:NCBI gene;Acc:424815] ortholog	11	protein_coding
Up	ENSMGAG00000002965	1.21	0.00117	ENSMGAG00000002965	Uncharacterized protein	12	protein_coding
Up	ENSMGAG00000019435	1.20637	0.00028	ENSMGAG00000019435	GTPase, IMAP family member 6 [Source:NCBI gene;Acc:420413] ortholog	6	protein_coding
Up	ENSMGAG00000013609	1.20204	0.00858	ENSMGAG00000013609	Ion_trans_2 domain-containing protein	5	protein_coding
Up	ENSMGAG00000011343	1.20011	2.45e-06	LDLRAD1	low density lipoprotein receptor class A domain containing 1	10	protein_coding
Up	ENSMGAG00000005241	1.20001	0.00734	PLXDC1	plexin domain containing 1 [Source:HGNC Symbol;Acc:HGNC:20945]	29	protein_coding
Up	ENSMGAG00000000686	1.19983	3.65e-07	UBXN11	UBX domain protein 11 [Source:HGNC Symbol;Acc:HGNC:30600]	25	protein_coding
Up	ENSMGAG00000001026	1.19967	0.00544	LOC100546734	transmembrane protein 45B-like	26	protein_coding
Up	ENSMGAG00000020540	1.19781	0.0092	CLDN5	claudin 5 [Source:NCBI gene;Acc:374028] ortholog	ADDD02077676.1	protein_coding
Up	ENSMGAG00000002190	1.19634	0.00279	TECTA	tectorin alpha [Source:HGNC Symbol;Acc:HGNC:11720]	26	protein_coding
Up	ENSMGAG00000008948	1.19623	0.0268	ENSMGAG00000008948	Uncharacterized protein	17	protein_coding
Up	ENSMGAG00000015290	1.19535	0.0234	GDPD5	glycerophosphodiester phosphodiesterase domain containing 5	1	protein_coding
Up	ENSMGAG00000007344	1.19491	0.000302	IRF8	interferon regulatory factor 8	13	protein_coding
Up	ENSMGAG00000001405	1.19422	0.0114	RNF165	ring finger protein 165 [Source:HGNC Symbol;Acc:HGNC:31696]	Z	protein_coding
Up	ENSMGAG00000019741	1.19379	6.08e-05	ENSMGAG00000019741	lncRNA	10	lncRNA
Up	ENSMGAG00000001819	1.19373	4.08e-05	WDR31	WD repeat domain 31 [Source:HGNC Symbol;Acc:HGNC:21421]	19	protein_coding
Up	ENSMGAG00000022188	1.19347	0.00539	GJA5	gap junction protein alpha 5	1	protein_coding
Up	ENSMGAG00000022353	1.19327	0.0197	SOX2	SRY-box transcription factor 2	KN387524.1	protein_coding
Up	ENSMGAG00000002522	1.19294	0.0381	HMMR	hyaluronan mediated motility receptor [Source:HGNC Symbol;Acc:HGNC:5012]	15	protein_coding
Up	ENSMGAG00000015047	1.19268	0.0006	STOML3	stomatin like 3 [Source:HGNC Symbol;Acc:HGNC:19420]	1	protein_coding
Up	ENSMGAG00000003065	1.19262	0.000337	STOML1	stomatin like 1	12	protein_coding
Up	ENSMGAG00000018785	1.19186	0.000542	LOC100538560	C-type lectin domain family 2 member D3-like [ Meleagris gallopavo (turkey) ]	1	protein_coding
Up	ENSMGAG00000019172	1.19185	0.0188	EFHD2	EF-hand domain family member D2 [Source:HGNC Symbol;Acc:HGNC:28670]	23	protein_coding
Up	ENSMGAG00000019246	1.19152	0.000308	ENSMGAG00000019246	pseudogene	23	pseudogene
Up	ENSMGAG00000022545	1.1899	1.18e-05	ENSMGAG00000022545	lncRNA	16	lncRNA
Up	ENSMGAG00000014461	1.18987	0.0157	VGLL3	Vestigial like family member 3	1	protein_coding
Up	ENSMGAG00000004698	1.18972	1.55e-05	PLK4	polo like kinase 4 [Source:HGNC Symbol;Acc:HGNC:11397]	4	protein_coding
Up	ENSMGAG00000017617	1.18965	0.00334	LOC104911082	ubiquitin-conjugating enzyme E2 L3-like	5	protein_coding
Up	ENSMGAG00000003520	1.18949	0.0304	ENSMGAG00000003520	Uncharacterized protein	KN388630.1	protein_coding
Up	ENSMGAG00000005613	1.18853	0.0287	CTRC	chymotrypsin C	23	protein_coding
Up	ENSMGAG00000011491	1.1876	9.37e-05	TERF1	telomeric repeat binding factor 1	3	protein_coding
Up	ENSMGAG00000022319	1.18751	3.08e-05	ENSMGAG00000022319	novel protein coding gene	KN387946.1	protein_coding
Up	ENSMGAG00000010683	1.18494	0.014	SLC4A8	solute carrier family 4 member 8 [Source:HGNC Symbol;Acc:HGNC:11034]	4	protein_coding
Up	ENSMGAG00000016891	1.18491	0.00229	CHEK1	checkpoint kinase 1 [Source:HGNC Symbol;Acc:HGNC:1925]	26	protein_coding
Up	ENSMGAG00000022900	1.1839	0.00742	ENSMGAG00000022900	lncRNA	20	lncRNA
Up	ENSMGAG00000022623	1.1833	1.55e-05	ENSMGAG00000022623	lncRNA	KN386810.1	lncRNA
Up	ENSMGAG00000017369	1.18223	0.0168	LOC104913232	proteinase-activated receptor 3-like	15	protein_coding
Up	ENSMGAG00000002399	1.18199	6.99e-07	EPHB1	EPH receptor B1	11	protein_coding
Up	ENSMGAG00000014784	1.18023	2.9e-07	TSGA10	testis specific 10 [Source:HGNC Symbol;Acc:HGNC:14927]	1	protein_coding
Up	ENSMGAG00000011551	1.18007	0.000271	HTRA1	HtrA serine peptidase 1	8	protein_coding
Up	ENSMGAG00000011861	1.17984	0.0276	JAKMIP3	Janus kinase and microtubule interacting protein 3 [Source:HGNC Symbol;Acc:HGNC:23523]	8	protein_coding
Up	ENSMGAG00000009205	1.17867	3.33e-05	AURKA	aurora kinase A	22	protein_coding
Up	ENSMGAG00000018617	1.17772	7.64e-07	EVA1B	eva-1 homolog B [Source:NCBI gene;Acc:101749609] ortholog	25	protein_coding
Up	ENSMGAG00000012308	1.17654	0.00291	SCTR	secretin receptor	7	protein_coding
Up	ENSMGAG00000006182	1.17602	0.0438	ENSMGAG00000006182	Ring finger protein 213	20	protein_coding
Up	ENSMGAG00000018364	1.17596	0.0208	C2H2orf50	chromosome 2 C2orf50 homolog	2	protein_coding
Up	ENSMGAG00000007380	1.17545	0.0436	LOC100551225	deoxycytidine kinase-like	15	protein_coding
Up	ENSMGAG00000004450	1.17523	0.00117	MPP2	membrane palmitoylated protein 2	29	protein_coding
Up	ENSMGAG00000020887	1.17478	0.0108	ENSMGAG00000020887	lncRNA	6	lncRNA
Up	ENSMGAG00000022116	1.17372	0.0232	ENSMGAG00000022116	novel protein coding gene	ADDD02229612.1	protein_coding
Up	ENSMGAG00000005177	1.17272	0.00056	FAM81A	family with sequence similarity 81 member A	12	protein_coding
Up	ENSMGAG00000012974	1.17242	0.0009	GLT8D2	glycosyltransferase 8 domain containing 2	1	protein_coding
Up	ENSMGAG00000006675	1.17172	0.023	SARDH	sarcosine dehydrogenase [Source:HGNC Symbol;Acc:HGNC:10536]	19	protein_coding
Up	ENSMGAG00000001803	1.17078	0.00122	ADAMTS10	ADAM metallopeptidase with thrombospondin type 1 motif 10	30	protein_coding
Up	ENSMGAG00000019411	1.17039	0.000176	LOC100550954	frizzled-2	KN386929.1	protein_coding
Up	ENSMGAG00000020604	1.16684	0.0305	ENSMGAG00000020604	tapasin-related protein-like [Source:NCBI gene;Acc:100857331] ortholog	21	protein_coding
Up	ENSMGAG00000001526	1.16674	0.000645	NMRK2	nicotinamide riboside kinase 2	30	protein_coding
Up	ENSMGAG00000008425	1.1657	0.000305	TOM1L1	target of myb1 like 1 membrane trafficking protein [Source:HGNC Symbol;Acc:HGNC:11983]	20	protein_coding
Up	ENSMGAG00000003375	1.16516	9.52e-09	AGRN	agrin	23	protein_coding
Up	ENSMGAG00000002387	1.16031	2.7e-05	KY	Kyphoscoliosis peptidase	11	protein_coding
Up	ENSMGAG00000022121	1.16004	6.02e-06	C3H5orf49	chromosome 3 C5orf49 homolog [ Meleagris gallopavo (turkey) ]	3	protein_coding
Up	ENSMGAG00000004572	1.15711	0.00625	FAM171B	family with sequence similarity 171 member B [Source:HGNC Symbol;Acc:HGNC:29412]	7	protein_coding
Up	ENSMGAG00000015773	1.15667	0.00369	TOR4A	Torsin family 4 member A	19	protein_coding
Up	ENSMGAG00000012417	1.15498	7.95e-06	KDELR3	KDEL endoplasmic reticulum protein retention receptor 3 [Source:HGNC Symbol;Acc:HGNC:6306]	1	protein_coding
Up	ENSMGAG00000008250	1.15326	0.000134	CCDC33	coiled-coil domain containing 33	12	protein_coding
Up	ENSMGAG00000020305	1.15234	0.0104	NACAD	NAC alpha domain containing	6	protein_coding
Up	ENSMGAG00000012786	1.1507	2.21e-07	TRAF4	TNF receptor associated factor 4	21	protein_coding
Up	ENSMGAG00000010133	1.14665	0.000151	PAQR5	progestin and adipoQ receptor family member 5 [Source:HGNC Symbol;Acc:HGNC:29645]	12	protein_coding
Up	ENSMGAG00000012507	1.14576	0.00854	COLEC10	collectin subfamily member 10 [Source:HGNC Symbol;Acc:HGNC:2220]	3	protein_coding
Up	ENSMGAG00000019241	1.14482	2.39e-05	ENSMGAG00000019241	novel protein coding gene	ADDD02252408.1	protein_coding
Up	ENSMGAG00000018427	1.14342	0.0113	SLC17A9	solute carrier family 17 member 9 [Source:NCBI gene;Acc:419236] ortholog	22	protein_coding
Up	ENSMGAG00000009478	1.1434	0.0045	ENSMGAG00000009478	Uncharacterized protein	1	protein_coding
Up	ENSMGAG00000020741	1.14273	0.00273	ENSMGAG00000020741	novel protein coding gene	ADDD02174682.1	protein_coding
Up	ENSMGAG00000005307	1.14118	0.0454	SHCBP1	SHC binding and spindle associated 1	13	protein_coding
Up	ENSMGAG00000003970	1.14092	3.27e-06	HNF4A	hepatocyte nuclear factor 4 alpha	22	protein_coding
Up	ENSMGAG00000020140	1.14071	0.0112	RSPH14	radial spoke head 14 homolog [ Meleagris gallopavo (turkey) ]	17	protein_coding
Up	ENSMGAG00000020382	1.13905	0.00847	PCSK5	proprotein convertase subtilisin/kexin type 5 [Source:NCBI gene;Acc:395456] ortholog	KN387001.1	protein_coding
Up	ENSMGAG00000008681	1.13881	6.86e-07	HAPLN3	hyaluronan and proteoglycan link protein 3 [Source:HGNC Symbol;Acc:HGNC:21446]	12	protein_coding
Up	ENSMGAG00000004854	1.13851	4.82e-07	WDPCP	WD repeat containing planar cell polarity effector [Source:HGNC Symbol;Acc:HGNC:28027]	2	protein_coding
Up	ENSMGAG00000012977	1.13824	4.18e-05	ENSMGAG00000012977	Uncharacterized protein	ADDD02096679.1	protein_coding
Up	ENSMGAG00000022975	1.13692	0.0122	CDK6	cyclin dependent kinase 6 [Source:HGNC Symbol;Acc:HGNC:1777]	6	protein_coding
Up	ENSMGAG00000004168	1.13676	3.76e-06	LOC104910121	tubulin beta-2 chain	3	protein_coding
Up	ENSMGAG00000018666	1.13633	0.0388	ENSMGAG00000018666	lncRNA	KN389589.1	lncRNA
Up	ENSMGAG00000003792	1.13621	5.47e-05	CERCAM	cerebral endothelial cell adhesion molecule	19	pseudogene
Up	ENSMGAG00000021062	1.13558	0.00507	TAP1	antigen peptide transporter 1	18	protein_coding
Up	ENSMGAG00000018310	1.13393	0.00442	ENSMGAG00000018310	lncRNA	15	lncRNA
Up	ENSMGAG00000004202	1.13372	5.64e-05	CD34	CD34 molecule [Source:HGNC Symbol;Acc:HGNC:1662]	28	protein_coding
Up	ENSMGAG00000015022	1.13284	1.46e-07	KCNRG	potassium channel regulator	1	protein_coding
Up	ENSMGAG00000002116	1.13255	0.00617	LOC100550056	probable glutamate receptor	23	protein_coding
Up	ENSMGAG00000005095	1.13172	6.84e-05	DDR2	discoidin domain receptor tyrosine kinase 2	10	protein_coding
Up	ENSMGAG00000000696	1.13147	7.95e-06	FEZ1	fasciculation and elongation protein zeta 1 [Source:HGNC Symbol;Acc:HGNC:3659]	26	protein_coding
Up	ENSMGAG00000018698	1.13034	0.0002	ENSMGAG00000018698	novel protein coding gene	13	protein_coding
Up	ENSMGAG00000018402	1.12892	0.000367	LOC100540939	teneurin-4 [ Meleagris gallopavo (turkey) ]	1	protein_coding
Up	ENSMGAG00000022484	1.12858	0.00109	ENSMGAG00000022484	lncRNA	1	lncRNA
Up	ENSMGAG00000005212	1.12755	0.0437	LOC100546313	voltage-dependent T-type calcium channel subunit alpha-1H-like	16	protein_coding
Up	ENSMGAG00000001895	1.12692	0.00179	TPPP	tubulin polymerization promoting protein [Source:HGNC Symbol;Acc:HGNC:24164]	3	protein_coding
Up	ENSMGAG00000009910	1.12617	0.000471	CNTN4	contactin 4 [Source:HGNC Symbol;Acc:HGNC:2174]	14	protein_coding
Up	ENSMGAG00000002416	1.12546	0.00329	SNCG	synuclein gamma [Source:HGNC Symbol;Acc:HGNC:11141]	8	protein_coding
Up	ENSMGAG00000017972	1.12475	0.00265	ENSMGAG00000017972	pseudogene	ADDD02100221.1	pseudogene
Up	ENSMGAG00000003304	1.12288	0.0027	MS4A12	Membrane spanning 4-domains A12	5	protein_coding
Up	ENSMGAG00000009762	1.12273	0.00529	CHL1	cell adhesion molecule L1 like [Source:HGNC Symbol;Acc:HGNC:1939]	14	protein_coding
Up	ENSMGAG00000009608	1.12262	5.33e-05	LOC100545461	antigen-presenting glycoprotein CD1d-like	18	protein_coding
Up	ENSMGAG00000012254	1.12259	0.00331	RASGRF1	Ras protein specific guanine nucleotide releasing factor 1	12	protein_coding
Up	ENSMGAG00000010547	1.12254	0.00173	SMC4	structural maintenance of chromosomes 4 [Source:HGNC Symbol;Acc:HGNC:14013]	11	protein_coding
Up	ENSMGAG00000017982	1.12117	0.00815	LOC100548983	complement receptor type 1 [ Meleagris gallopavo (turkey) ]	28	protein_coding
Up	ENSMGAG00000011286	1.12114	8.19e-05	DCN	decorin [Source:HGNC Symbol;Acc:HGNC:2705]	1	protein_coding
Up	ENSMGAG00000018742	1.121	0.0174	ENSMGAG00000018742	novel protein coding gene	5	protein_coding
Up	ENSMGAG00000021720	1.11998	0.0458	ENSMGAG00000021720	novel protein coding gene	14	protein_coding
Up	ENSMGAG00000021378	1.11951	1.28e-05	ENSMGAG00000021378	novel protein coding gene	1	protein_coding
Up	ENSMGAG00000010832	1.11864	0.0465	LOC104910218	GLIPR1-like protein 1	1	protein_coding
Up	ENSMGAG00000019965	1.11794	5.4e-06	TCF7L1	transcription factor 7 like 1 [Source:NCBI gene;Acc:395230] ortholog	KN389326.1	protein_coding
Up	ENSMGAG00000017748	1.11786	0.00193	TGIF1	TGFB induced factor homeobox 1 [ Meleagris gallopavo (turkey) ]	3	protein_coding
Up	ENSMGAG00000004808	1.11687	0.0269	SBK1	SH3 domain binding kinase 1	ADDD02196186.1	protein_coding
Up	ENSMGAG00000019393	1.11639	0.0393	ENSMGAG00000019393	novel protein coding gene	KN389614.1	protein_coding
Up	ENSMGAG00000015637	1.11611	7.04e-05	CCDC89	Coiled-coil domain containing 89	1	protein_coding
Up	ENSMGAG00000001827	1.11481	0.0352	KCNIP1	potassium voltage-gated channel interacting protein 1 [Source:HGNC Symbol;Acc:HGNC:15521]	15	protein_coding
Up	ENSMGAG00000009029	1.11378	0.000341	SLC9A3R1	SLC9A3 regulator 1 [Source:HGNC Symbol;Acc:HGNC:11075]	20	protein_coding
Up	ENSMGAG00000017108	1.11279	1.97e-05	FAM81B	family with sequence similarity 81 member B [Source:HGNC Symbol;Acc:HGNC:26335]	Z	protein_coding
Up	ENSMGAG00000010956	1.11225	0.00328	NAV3	neuron navigator 3 [Source:HGNC Symbol;Acc:HGNC:15998]	1	protein_coding
Up	ENSMGAG00000004132	1.11038	5.3e-05	ITM2C	integral membrane protein 2C	11	protein_coding
Up	ENSMGAG00000006992	1.11036	2.17e-09	FKBP10	FKBP prolyl isomerase 10	29	protein_coding
Up	ENSMGAG00000005662	1.10963	0.0396	SARM1	sterile alpha and TIR motif containing 1 [Source:HGNC Symbol;Acc:HGNC:17074]	21	protein_coding
Up	ENSMGAG00000019113	1.1096	0.000209	ENSMGAG00000019113	novel protein coding gene	11	protein_coding
Up	ENSMGAG00000002249	1.1079	0.03	ENSMGAG00000002249	Polypeptide N-acetylgalactosaminyltransferase 17	21	protein_coding
Up	ENSMGAG00000020436	1.10667	0.000986	MCM6	minichromosome maintenance complex component 6 [Source:HGNC Symbol;Acc:HGNC:6949]	7	protein_coding
Up	ENSMGAG00000006588	1.10313	0.00189	LRRN4	leucine rich repeat neuronal 4	2	protein_coding
Up	ENSMGAG00000017533	1.10131	0.0188	CA2	carbonic anhydrase 2 [Source:NCBI gene;Acc:396257] ortholog	3	protein_coding
Up	ENSMGAG00000022216	1.10008	0.0103	ENSMGAG00000022216	novel protein coding gene	18	protein_coding
Up	ENSMGAG00000004780	1.09841	0.0212	COMP	cartilage oligomeric matrix protein	30	protein_coding
Up	ENSMGAG00000006746	1.09803	0.00035	DNAH7	dynein axonemal heavy chain 7 [Source:HGNC Symbol;Acc:HGNC:18661]	7	protein_coding
Up	ENSMGAG00000022462	1.09794	0.00601	ENSMGAG00000022462	novel protein coding gene	2	protein_coding
Up	ENSMGAG00000009439	1.09784	0.00676	P2RX6	P2X purinoceptor	17	protein_coding
Up	ENSMGAG00000012597	1.0951	0.000911	RAC2	Rac family small GTPase 2 [Source:HGNC Symbol;Acc:HGNC:9802]	1	protein_coding
Up	ENSMGAG00000012567	1.0928	0.000964	COL14A1	collagen type XIV alpha 1 chain [Source:HGNC Symbol;Acc:HGNC:2191]	3	protein_coding
Up	ENSMGAG00000013441	1.09192	0.00712	KIF26A	kinesin family member 26A [Source:HGNC Symbol;Acc:HGNC:20226]	5	protein_coding
Up	ENSMGAG00000021717	1.09067	0.0466	ENSMGAG00000021717	novel protein coding gene	4	protein_coding
Up	ENSMGAG00000002999	1.0899	3.53e-05	MST1	macrophage stimulating 1	14	pseudogene
Up	ENSMGAG00000015362	1.08848	2.18e-05	ENSMGAG00000015362	Uncharacterized protein	5	protein_coding
Up	ENSMGAG00000001543	1.08783	2.12e-08	NAV1	neuron navigator 1	28	protein_coding
Up	ENSMGAG00000010024	1.08749	0.0166	LOC100541737	leucine-rich repeats and immunoglobulin-like domains protein 3	1	protein_coding
Up	ENSMGAG00000013042	1.08586	0.00766	BCL11A	BAF chromatin remodeling complex subunit BCL11A [Source:HGNC Symbol;Acc:HGNC:13221]	2	protein_coding
Up	ENSMGAG00000021366	1.08524	0.0263	ENSMGAG00000021366	novel protein coding gene	KN389598.1	protein_coding
Up	ENSMGAG00000008400	1.08474	0.000445	STXBP4	syntaxin binding protein 4 [Source:HGNC Symbol;Acc:HGNC:19694]	20	protein_coding
Up	ENSMGAG00000012854	1.08362	0.0445	ABLIM2	actin binding LIM protein family member 2 [Source:HGNC Symbol;Acc:HGNC:19195]	4	protein_coding
Up	ENSMGAG00000020217	1.08349	0.000439	ENSMGAG00000020217	novel protein coding gene	5	protein_coding
Up	ENSMGAG00000022570	1.08312	0.0171	ENSMGAG00000022570	novel protein coding gene	ADDD02254488.1	protein_coding
Up	ENSMGAG00000019733	1.0818	0.00566	ENSMGAG00000019733	lncRNA	2	lncRNA
Up	ENSMGAG00000006799	1.08175	0.0165	BCO1	beta-carotene oxygenase 1	13	protein_coding
Up	ENSMGAG00000018263	1.08065	0.0194	CYP2J22	cytochrome P450, family 2, subfamily J, polypeptide 22 [Source:NCBI gene;Acc:424677] ortholog	10	protein_coding
Up	ENSMGAG00000005902	1.08024	0.0115	MSMP	microseminoprotein, prostate associated [Source:HGNC Symbol;Acc:HGNC:29663]	Z	protein_coding
Up	ENSMGAG00000008934	1.07954	0.00446	SLCO3A1	solute carrier organic anion transporter family member 3A1 [Source:HGNC Symbol;Acc:HGNC:10952]	12	protein_coding
Up	ENSMGAG00000009604	1.07879	0.0034	IGDCC3	immunoglobulin superfamily DCC subclass member 3 [Source:HGNC Symbol;Acc:HGNC:9700]	12	protein_coding
Up	ENSMGAG00000010467	1.07839	1.19e-05	LOXL3	lysyl oxidase like 3 [Source:HGNC Symbol;Acc:HGNC:13869]	5	protein_coding
Up	ENSMGAG00000019464	1.07712	0.0165	ENSMGAG00000019464	novel protein coding gene	ADDD02263190.1	protein_coding
Up	ENSMGAG00000014056	1.0757	2.1e-05	FKBP1B	FKBP prolyl isomerase 1B	2	protein_coding
Up	ENSMGAG00000006627	1.07566	0.0184	RGS19	regulator of G-protein signaling 19	22	protein_coding
Up	ENSMGAG00000006979	1.07255	5.87e-07	LOC100538957	signal-regulatory protein delta-like	22	protein_coding
Up	ENSMGAG00000009429	1.07223	1.89e-09	PCSK6	proprotein convertase subtilisin/kexin type 6 [Source:HGNC Symbol;Acc:HGNC:8569]	12	protein_coding
Up	ENSMGAG00000022645	1.07138	0.00156	ENSMGAG00000022645	KIAA1614 [Source:NCBI gene;Acc:424414] ortholog	10	protein_coding
Up	ENSMGAG00000004429	1.07136	0.0351	ASPN	asporin [Source:HGNC Symbol;Acc:HGNC:14872]	14	protein_coding
Up	ENSMGAG00000005973	1.07077	8.03e-05	KIRREL	kin of IRRE like (Drosophila)	27	protein_coding
Up	ENSMGAG00000015897	1.0686	0.00103	FLRT3	fibronectin leucine rich transmembrane protein 3 [Source:HGNC Symbol;Acc:HGNC:3762]	2	protein_coding
Up	ENSMGAG00000007887	1.06833	0.0164	TGM2	transglutaminase 2	22	protein_coding
Up	ENSMGAG00000003604	1.06801	0.00846	ENSMGAG00000003604	Uncharacterized protein	KN387733.1	protein_coding
Up	ENSMGAG00000002313	1.06641	0.0175	LOC100539008	glutamine synthetase	19	protein_coding
Up	ENSMGAG00000007101	1.06626	0.0213	LOC100549082	proproteinase E-like	23	protein_coding
Up	ENSMGAG00000022491	1.06591	0.00401	ENSMGAG00000022491	novel protein coding gene	KN387929.1	protein_coding
Up	ENSMGAG00000003927	1.06537	0.000761	LY86	lymphocyte antigen 86 [Source:HGNC Symbol;Acc:HGNC:16837]	3	protein_coding
Up	ENSMGAG00000018462	1.06498	0.00179	FAM136A	family with sequence similarity 136 member A [Source:HGNC Symbol;Acc:HGNC:25911]	24	protein_coding
Up	ENSMGAG00000003306	1.06443	0.00195	FN1	fibronectin 1 [Source:HGNC Symbol;Acc:HGNC:3778]	7	protein_coding
Up	ENSMGAG00000006113	1.06427	0.000705	LOC100543549	coiled-coil domain-containing protein 146	1	protein_coding
Up	ENSMGAG00000006393	1.06295	7.78e-05	C5H11orf16	chromosome 5 C11orf16 homolog	5	protein_coding
Up	ENSMGAG00000022384	1.06231	0.0195	ENSMGAG00000022384	novel protein coding gene	5	protein_coding
Up	ENSMGAG00000008989	1.06198	1.46e-05	ENSMGAG00000008989	pseudogene	11	pseudogene
Up	ENSMGAG00000001550	1.0603	0.0144	TCEA3	transcription elongation factor A3	25	protein_coding
Up	ENSMGAG00000017347	1.06005	1.15e-05	OLFML3	olfactomedin like 3 [Source:NCBI gene;Acc:419882] ortholog	28	protein_coding
Up	ENSMGAG00000010073	1.05905	0.00857	ITGA11	integrin subunit alpha 11 [Source:HGNC Symbol;Acc:HGNC:6136]	12	protein_coding
Up	ENSMGAG00000017631	1.05829	4.17e-05	ENSMGAG00000017631	novel protein coding gene	2	protein_coding
Up	ENSMGAG00000002850	1.05732	3.96e-05	LOC100549955	perilipin-3-like	30	protein_coding
Up	ENSMGAG00000007072	1.05676	0.0147	REM1	RRAD and GEM like GTPase 1	22	protein_coding
Up	ENSMGAG00000006942	1.05603	0.00141	SYNDIG1	synapse differentiation inducing 1 [Source:HGNC Symbol;Acc:HGNC:15885]	2	protein_coding
Up	ENSMGAG00000013774	1.05343	0.00941	HTR1B	5-hydroxytryptamine receptor 1B [Source:NCBI gene;Acc:421858] ortholog	KN388071.1	protein_coding
Up	ENSMGAG00000015311	1.05301	0.00798	P4HA3	prolyl 4-hydroxylase subunit alpha 3 [Source:HGNC Symbol;Acc:HGNC:30135]	1	protein_coding
Up	ENSMGAG00000010233	1.05159	0.00109	EPHA5	EPH receptor A5 [Source:HGNC Symbol;Acc:HGNC:3389]	4	protein_coding
Up	ENSMGAG00000008533	1.05152	0.0197	BRSK2	BR serine/threonine kinase 2 [Source:HGNC Symbol;Acc:HGNC:11405]	5	protein_coding
Up	ENSMGAG00000013971	1.05148	0.00595	PXDN	peroxidasin [Source:HGNC Symbol;Acc:HGNC:14966]	2	protein_coding
Up	ENSMGAG00000020716	1.05081	0.000733	ENSMGAG00000020716	novel protein coding gene	ADDD02292598.1	protein_coding
Up	ENSMGAG00000013404	1.05071	0.00832	LAMA4	laminin subunit alpha 4	2	protein_coding
Up	ENSMGAG00000013100	1.05034	0.00366	FBLN5	fibulin 5 [Source:HGNC Symbol;Acc:HGNC:3602]	5	protein_coding
Up	ENSMGAG00000023009	1.04873	0.0486	ANKS1B	ankyrin repeat and sterile alpha motif domain containing 1B [Source:NCBI gene;Acc:417927] ortholog	1	protein_coding
Up	ENSMGAG00000002659	1.04701	0.00176	LOC100546355	prominin-1-A-like	8	protein_coding
Up	ENSMGAG00000001894	1.047	0.000351	LOC100544252	protocadherin gamma-C5-like	15	protein_coding
Up	ENSMGAG00000015119	1.04673	0.00571	SACS	sacsin molecular chaperone	1	protein_coding
Up	ENSMGAG00000000665	1.045	0.0198	ARHGAP25	Rho GTPase activating protein 25	24	protein_coding
Up	ENSMGAG00000004846	1.04241	0.0109	VDR	vitamin D receptor	KN387201.1	protein_coding
Up	ENSMGAG00000020241	1.04161	0.0321	ENSMGAG00000020241	lncRNA	29	lncRNA
Up	ENSMGAG00000013502	1.04155	1.48e-05	ZBTB25	zinc finger and BTB domain containing 25 [Source:HGNC Symbol;Acc:HGNC:13112]	5	protein_coding
Up	ENSMGAG00000002181	1.04083	0.000238	LOXL1	lysyl oxidase like 1 [Source:HGNC Symbol;Acc:HGNC:6665]	12	protein_coding
Up	ENSMGAG00000009959	1.04041	0.0228	ABHD3	abhydrolase domain containing 3, phospholipase [Source:HGNC Symbol;Acc:HGNC:18718]	3	protein_coding
Up	ENSMGAG00000004210	1.03973	0.00179	ENSMGAG00000004210	Uncharacterized protein	20	protein_coding
Up	ENSMGAG00000004467	1.03926	1.24e-11	GATSL3	GATS protein like 3	17	protein_coding
Up	ENSMGAG00000002600	1.03899	0.00074	THY1	Thy-1 cell surface antigen [Source:HGNC Symbol;Acc:HGNC:11801]	26	protein_coding
Up	ENSMGAG00000020268	1.03888	0.0002	TLR1A	toll-like receptor 1 family member A [Source:NCBI gene;Acc:426274] ortholog	4	protein_coding
Up	ENSMGAG00000022201	1.03876	0.0298	USP18	ubiquitin specific peptidase 18 [ Meleagris gallopavo (turkey) ]	1	protein_coding
Up	ENSMGAG00000001969	1.03751	0.0444	UBASH3B	ubiquitin associated and SH3 domain containing B [Source:HGNC Symbol;Acc:HGNC:29884]	26	protein_coding
Up	ENSMGAG00000010191	1.03736	6e-06	BTBD19	BTB domain containing 19 [Source:HGNC Symbol;Acc:HGNC:27145]	10	protein_coding
Up	ENSMGAG00000010791	1.03607	0.00597	VANGL2	VANGL planar cell polarity protein 2	27	protein_coding
Up	ENSMGAG00000002818	1.03284	1.09e-05	IQCA1	IQ motif containing with AAA domain 1 [Source:HGNC Symbol;Acc:HGNC:26195]	7	protein_coding
Up	ENSMGAG00000021473	1.03194	0.0172	ENSMGAG00000021473	novel protein coding gene	ADDD02135642.1	protein_coding
Up	ENSMGAG00000005879	1.03112	0.00114	IL22RA1	interleukin 22 receptor subunit alpha 1	25	protein_coding
Up	ENSMGAG00000003783	1.03017	0.00181	ENSMGAG00000003783	TPR_REGION domain-containing protein	19	protein_coding
Up	ENSMGAG00000005010	1.0301	0.0151	FAM124B	family with sequence similarity 124 member B	11	protein_coding
Up	ENSMGAG00000001355	1.02978	0.00782	KMO	kynurenine 3-monooxygenase	7	protein_coding
Up	ENSMGAG00000005227	1.02907	2.11e-06	SPDYA	speedy/RINGO cell cycle regulator family member A [Source:HGNC Symbol;Acc:HGNC:30613]	2	protein_coding
Up	ENSMGAG00000008238	1.02807	0.00298	LSP1	lymphocyte specific protein 1	5	protein_coding
Up	ENSMGAG00000006185	1.02753	0.00609	WEE1	WEE1 G2 checkpoint kinase	5	protein_coding
Up	ENSMGAG00000016622	1.02543	0.0177	FRMD3	FERM domain containing 3 [Source:HGNC Symbol;Acc:HGNC:24125]	Z	protein_coding
Up	ENSMGAG00000021236	1.02399	0.00532	ENSMGAG00000021236	novel protein coding gene	ADDD02162971.1	protein_coding
Up	ENSMGAG00000005960	1.02323	0.0214	ENSMGAG00000005960	GB1/RHD3-type G domain-containing protein	KN389185.1	protein_coding
Up	ENSMGAG00000008955	1.02264	4.24e-05	DNAI3	dynein axonemal intermediate chain 3 [Source:HGNC Symbol;Acc:HGNC:30711]	10	protein_coding
Up	ENSMGAG00000015798	1.02213	0.0463	P2RY10	P2Y receptor family member 10	9	protein_coding
Up	ENSMGAG00000006509	1.02189	5.48e-06	CDH11	cadherin 11	13	protein_coding
Up	ENSMGAG00000008110	1.02048	0.0198	VSTM4	V-set and transmembrane domain containing 4 [Source:HGNC Symbol;Acc:HGNC:26470]	8	protein_coding
Up	ENSMGAG00000004433	1.01943	0.000339	TMEM161A	transmembrane protein 161A [Source:HGNC Symbol;Acc:HGNC:26020]	30	protein_coding
Up	ENSMGAG00000015296	1.01935	0.00924	XRRA1	X-ray radiation resistance associated 1	1	protein_coding
Up	ENSMGAG00000000985	1.01867	0.0428	TMEM173	stimulator of interferon response cGAMP interactor 1	15	protein_coding
Up	ENSMGAG00000014834	1.01849	0.00429	SH3RF3	SH3 domain containing ring finger 3 [Source:HGNC Symbol;Acc:HGNC:24699]	1	protein_coding
Up	ENSMGAG00000021319	1.0184	0.000152	AK1	adenylate kinase 1 [Source:HGNC Symbol;Acc:HGNC:361]	19	protein_coding
Up	ENSMGAG00000018934	1.01525	6.86e-05	TMSB15B	thymosin beta 15B	9	protein_coding
Up	ENSMGAG00000017545	1.0146	0.0043	ENSMGAG00000017545	novel protein coding gene	14	protein_coding
Up	ENSMGAG00000021389	1.01433	0.00881	LOC104911970	kinesin-like protein KIF20B [ Meleagris gallopavo (turkey) ]	8	protein_coding
Up	ENSMGAG00000011676	1.01422	0.0044	KIF15	kinesin family member 15 [Source:HGNC Symbol;Acc:HGNC:17273]	6	protein_coding
Up	ENSMGAG00000023022	1.01377	0.0259	LRRC75A	leucine rich repeat containing 75A [Source:NCBI gene;Acc:417550] ortholog	21	protein_coding
Up	ENSMGAG00000014313	1.01325	0.0209	IGSF11	immunoglobulin superfamily member 11 [Source:HGNC Symbol;Acc:HGNC:16669]	1	protein_coding
Up	ENSMGAG00000008969	1.01296	0.0131	TES	testin LIM domain protein [Source:HGNC Symbol;Acc:HGNC:14620]	1	protein_coding
Up	ENSMGAG00000010114	1.01076	0.000938	LRRC72	leucine rich repeat containing 72	6	protein_coding
Up	ENSMGAG00000012517	1.01039	0.0374	ENPP2	ectonucleotide pyrophosphatase/phosphodiesterase 2 [Source:HGNC Symbol;Acc:HGNC:3357]	3	protein_coding
Up	ENSMGAG00000011653	1.00835	0.00306	CLEC3B	C-type lectin domain family 3 member B [Source:HGNC Symbol;Acc:HGNC:11891]	6	protein_coding
Up	ENSMGAG00000000678	1.00778	0.00195	LOC100538808	Fc receptor-like protein 4	27	protein_coding
Up	ENSMGAG00000019657	1.0053	0.00943	HMCN1	hemicentin 1 [Source:NCBI ge ne;Acc:429823]ortholog	10	protein_coding
Up	ENSMGAG00000019779	1.00428	0.00316	ENSMGAG00000019779	ZFP2 zinc finger protein [Source:NCBI gene;Acc:427922] ortholog	1	protein_coding
Up	ENSMGAG00000021030	1.00398	0.00442	CELSR2	cadherin EGF LAG seven-pass G-type receptor 2 [Source:NCBI gene;Acc:430126] ortholog	KN387089.1	protein_coding
Up	ENSMGAG00000022175	1.00218	0.0275	EMID1	EMI domain containing 1 [Source:NCBI gene;Acc:100859612] ortholog	17	protein_coding
Up	ENSMGAG00000002703	1.00153	0.00188	PCDH18	protocadherin 18 [Source:HGNC Symbol;Acc:HGNC:14268]	4	protein_coding
Up	ENSMGAG00000009072	1.00008	0.000375	LOC100549289	RNA-binding protein 38-like	22	protein_coding
Up	ENSMGAG00000000492	0.999452	0.0153	MIR34A	Gallus gallus microRNA 34a (MIR34A)	23	miRNA
Up	ENSMGAG00000006969	0.999381	0.00957	FBN1	fibrillin 1 [Source:HGNC Symbol;Acc:HGNC:3603]	12	protein_coding
Up	ENSMGAG00000015929	0.999171	0.0159	TLR5	toll like receptor 5	2	protein_coding
Up	ENSMGAG00000001625	0.998405	0.0074	ACSBG2	acyl-CoA synthetase bubblegum family member 2	30	protein_coding
Up	ENSMGAG00000007044	0.99717	0.00686	LOC104914173	CDP-diacylglycerol--serine O-phosphatidyltransferase	23	protein_coding
Up	ENSMGAG00000012147	0.997001	0.0201	ITGA9	integrin subunit alpha 9 [Source:HGNC Symbol;Acc:HGNC:6145]	6	protein_coding
Up	ENSMGAG00000000886	0.996723	0.0252	HSF4	heat shock transcription factor 4	13	protein_coding
Up	ENSMGAG00000001477	0.995818	0.000145	ASAP3	ArfGAP with SH3 domain, ankyrin repeat and PH domain 3	25	protein_coding
Up	ENSMGAG00000001113	0.994888	3.95e-07	GABPB2	GA binding protein transcription factor subunit beta 2 [Source:HGNC Symbol;Acc:HGNC:28441]	27	protein_coding
Up	ENSMGAG00000015171	0.992851	0.0133	LOC100543400	matrix metalloproteinase-27-like	1	protein_coding
Up	ENSMGAG00000005030	0.99275	3.43e-06	RNF19B	RBR-type E3 ubiquitin transferase (EC 2.3.2.31)	25	protein_coding
Up	ENSMGAG00000010852	0.992601	0.000879	GMCL1	germ cell-less 1, spermatogenesis associated	24	protein_coding
Up	ENSMGAG00000022002	0.990054	0.00154	ENSMGAG00000022002	novel protein coding gene	11	protein_coding
Up	ENSMGAG00000006339	0.989158	0.000768	DNAH12	dynein axonemal heavy chain 12 [Source:HGNC Symbol;Acc:HGNC:2943]	14	protein_coding
Up	ENSMGAG00000006220	0.989132	0.000115	ZDHHC4	Palmitoyltransferase (EC 2.3.1.225)	16	protein_coding
Up	ENSMGAG00000003546	0.989035	1.81e-05	NEURL1B	neuralized E3 ubiquitin protein ligase 1B	15	protein_coding
Up	ENSMGAG00000013686	0.987793	0.00017	SAMD4A	sterile alpha motif domain containing 4A [Source:HGNC Symbol;Acc:HGNC:23023]	5	protein_coding
Up	ENSMGAG00000012828	0.98581	0.00765	AFAP1	actin filament associated protein 1	4	protein_coding
Up	ENSMGAG00000007003	0.985707	0.00514	ESPN	Espin	23	protein_coding
Up	ENSMGAG00000003424	0.985133	0.000507	DLEC1	DLEC1 cilia and flagella associated protein [Source:HGNC Symbol;Acc:HGNC:2899]	6	protein_coding
Up	ENSMGAG00000009913	0.984972	0.027	SERTAD4	SERTA domain containing 4 [Source:HGNC Symbol;Acc:HGNC:25236]	2	protein_coding
Up	ENSMGAG00000010957	0.984971	0.000372	PP2D1	protein phosphatase 2C like domain containing 1	6	protein_coding
Up	ENSMGAG00000021497	0.983949	0.0164	FGL2	fibrinogen like 2 [ Meleagris gallopavo (turkey) ]	1	protein_coding
Up	ENSMGAG00000018338	0.983767	0.00403	BHLHE40	basic helix-loop-helix family member e40 [Source:HGNC Symbol;Acc:HGNC:1046]	14	protein_coding
Up	ENSMGAG00000018188	0.983329	0.0252	GALNT17	Williams-Beuren syndrome chromosome region 17 [Source:NCBI gene;Acc:417480] ortholog	21	protein_coding
Up	ENSMGAG00000013783	0.982677	0.00641	GNG2	G protein subunit gamma 2 [Source:HGNC Symbol;Acc:HGNC:4404]	5	protein_coding
Up	ENSMGAG00000016041	0.982173	0.000277	ENSMGAG00000016041	ATP-grasp domain-containing protein	KN389200.1	protein_coding
Up	ENSMGAG00000011846	0.981465	0.038	LOC100541400	Y+L amino acid transporter 2-like	3	protein_coding
Up	ENSMGAG00000002094	0.980854	0.0087	ercc6l	ERCC excision repair 6 like, spindle assembly checkpoint helicase	9	protein_coding
Up	ENSMGAG00000011271	0.978865	0.000121	PPP1R42	Protein phosphatase 1 regulatory subunit 42	3	protein_coding
Up	ENSMGAG00000002963	0.978689	0.0268	CACNA1E	calcium voltage-gated channel subunit alpha1 E	10	protein_coding
Up	ENSMGAG00000022379	0.97863	0.022	ENSMGAG00000022379	novel protein coding gene	2	protein_coding
Up	ENSMGAG00000003143	0.978035	0.022	PARD6A	Par-6 family cell polarity regulator alpha	13	protein_coding
Up	ENSMGAG00000002474	0.975971	0.00878	MCAM	melanoma cell adhesion molecule [Source:HGNC Symbol;Acc:HGNC:6934]	26	protein_coding
Up	ENSMGAG00000017647	0.975015	0.0138	TSPAN19	tetraspanin 19 [Source:HGNC Symbol;Acc:HGNC:31886]	1	protein_coding
Up	ENSMGAG00000017645	0.974062	0.00129	LOC104909699	uncharacterized LOC104909699	2	protein_coding
Up	ENSMGAG00000013132	0.9727	0.0115	RIN3	Ras and Rab interactor 3 [Source:HGNC Symbol;Acc:HGNC:18751]	5	protein_coding
Up	ENSMGAG00000013302	0.972046	0.0105	ENSMGAG00000013302	Uncharacterized protein	1	protein_coding
Up	ENSMGAG00000012538	0.971089	0.0389	LGALS1	galectin 1 [Source:HGNC Symbol;Acc:HGNC:6561]	1	protein_coding
Up	ENSMGAG00000001357	0.970734	0.000273	CCDC157	Coiled-coil domain containing 157	17	protein_coding
Up	ENSMGAG00000014861	0.97059	0.00903	COL4A1	collagen type IV alpha 1 chain [Source:HGNC Symbol;Acc:HGNC:2202]	1	protein_coding
Up	ENSMGAG00000002218	0.96873	0.00223	TWIST2	twist family bHLH transcription factor 2 [Source:HGNC Symbol;Acc:HGNC:20670]	7	protein_coding
Up	ENSMGAG00000012922	0.968322	0.00163	CCDC148	coiled-coil domain containing 148	7	protein_coding
Up	ENSMGAG00000006057	0.967867	7.32e-05	RAB26	RAB26, member RAS oncogene family	16	protein_coding
Up	ENSMGAG00000011922	0.967178	6.81e-05	SPATA18	spermatogenesis associated 18 [Source:HGNC Symbol;Acc:HGNC:29579]	4	protein_coding
Up	ENSMGAG00000019606	0.966402	0.00897	GTDC1	glycosyltransferase like domain containing 1 [Source:NCBI gene;Acc:424304] ortholog	7	protein_coding
Up	ENSMGAG00000009713	0.965512	0.0184	LOC104913620	antigen peptide transporter 2-like	18	protein_coding
Up	ENSMGAG00000021708	0.964784	0.0484	ENSMGAG00000021708	novel protein coding gene	7	protein_coding
Up	ENSMGAG00000014717	0.96326	0.00978	CLCN4	chloride voltage-gated channel 4 [Source:HGNC Symbol;Acc:HGNC:2022]	1	protein_coding
Up	ENSMGAG00000005537	0.963034	0.00127	CFH	complement factor H	10	protein_coding
Up	ENSMGAG00000019979	0.962214	0.0076	LOC104914612	uncharacterized LOC104914612	29	protein_coding
Up	ENSMGAG00000021602	0.961931	0.0368	E2F2	E2F transcription factor 2 [Source:HGNC Symbol;Acc:HGNC:3114]	25	protein_coding
Up	ENSMGAG00000013956	0.961754	0.00591	A2M	alpha-2-macroglobulin	KN386716.1	protein_coding
Up	ENSMGAG00000017155	0.961216	0.000367	ENSMGAG00000017155	ASD2 domain-containing protein	9	protein_coding
Up	ENSMGAG00000014116	0.960808	0.000117	P3H3	Procollagen-proline 3-dioxygenase (EC 1.14.11.7)	1	protein_coding
Up	ENSMGAG00000003414	0.960412	0.00163	GLYCTK	glycerate kinase [Source:HGNC Symbol;Acc:HGNC:24247]	14	protein_coding
Up	ENSMGAG00000015288	0.959696	0.00165	DGAT2	DGAT2 diacylglycerol O-acyltransferase 2 [ Meleagris gallopavo (turkey) ]	1	protein_coding
Up	ENSMGAG00000002463	0.959192	0.00349	PTPRU	protein tyrosine phosphatase receptor type U	25	protein_coding
Up	ENSMGAG00000005789	0.959187	0.0477	KCNMA1	potassium calcium-activated channel subfamily M alpha 1 [Source:HGNC Symbol;Acc:HGNC:6284]	8	protein_coding
Up	ENSMGAG00000001019	0.959053	0.0228	BARX2	BARX homeobox 2 [Source:HGNC Symbol;Acc:HGNC:956]	26	protein_coding
Up	ENSMGAG00000022283	0.957496	0.0218	CLCF1	cardiotrophin like cytokine factor 1 [Source:HGNC Symbol;Acc:HGNC:17412]	KN389200.1	protein_coding
Up	ENSMGAG00000007987	0.956151	0.000231	SPEF1	sperm flagellar 1	KN389290.1	protein_coding
Up	ENSMGAG00000021790	0.955341	0.00788	LOC104909483	outer dense fiber protein 3-like	2	protein_coding
Up	ENSMGAG00000011680	0.954595	6.33e-05	KANK4	KN motif and ankyrin repeat domains 4 [Source:HGNC Symbol;Acc:HGNC:27263]	10	protein_coding
Up	ENSMGAG00000017102	0.954209	0.0217	ABCA7	ATP binding cassette subfamily A member 7	30	pseudogene
Up	ENSMGAG00000001459	0.953169	4.65e-05	ZMYND10	zinc finger MYND-type containing 10 [Source:HGNC Symbol;Acc:HGNC:19412]	14	protein_coding
Up	ENSMGAG00000013403	0.951544	0.00152	LOC100541596	interferon-induced guanylate-binding protein 1-like	KN389462.1	protein_coding
Up	ENSMGAG00000002317	0.951123	0.0447	ETV4	ETS variant transcription factor 4 [Source:HGNC Symbol;Acc:HGNC:3493]	29	protein_coding
Up	ENSMGAG00000003998	0.950128	2.8e-05	DNM1	dynamin 1 [Source:HGNC Symbol;Acc:HGNC:2972]	19	protein_coding
Up	ENSMGAG00000018893	0.948956	0.00122	ENSMGAG00000018893	lncRNA	2	lncRNA
Up	ENSMGAG00000021023	0.948718	0.0441	IGFBP5	insulin like growth factor binding protein 5 [Source:NCBI gene;Acc:424220] ortholog	7	protein_coding
Up	ENSMGAG00000003302	0.948353	0.0461	KIFC3	kinesin family member C3	13	protein_coding
Up	ENSMGAG00000019237	0.94734	0.021	CACNA1H	calcium voltage-gated channel subunit alpha1 H [Source:HGNC Symbol;Acc:HGNC:1395] ortholog	16	protein_coding
Up	ENSMGAG00000012572	0.945599	0.038	MTBP	MDM2 binding protein [Source:HGNC Symbol;Acc:HGNC:7417]	3	protein_coding
Up	ENSMGAG00000005115	0.943869	0.00824	LOC100547239	ectoderm-neural cortex protein 1-like [ Meleagris gallopavo (turkey) ]	30	protein_coding
Up	ENSMGAG00000013681	0.943763	0.0235	GCH1	GTP cyclohydrolase 1 [Source:HGNC Symbol;Acc:HGNC:4193]	5	protein_coding
Up	ENSMGAG00000002549	0.942437	0.00837	GJC2	gap junction protein gamma 2 [Source:HGNC Symbol;Acc:HGNC:17494]	6	protein_coding
Up	ENSMGAG00000016954	0.941974	0.0235	ENSMGAG00000016954	Protein kinase domain-containing protein	28	protein_coding
Up	ENSMGAG00000014700	0.941427	0.0035	GPM6B	glycoprotein M6B [Source:HGNC Symbol;Acc:HGNC:4461]	1	protein_coding
Up	ENSMGAG00000010491	0.940838	0.00041	GJC1	gap junction protein gamma 1 [Source:HGNC Symbol;Acc:HGNC:4280]	29	protein_coding
Up	ENSMGAG00000006420	0.94073	6.75e-05	CMTM3	CKLF like MARVEL transmembrane domain containing 3	13	protein_coding
Up	ENSMGAG00000001277	0.940618	4.53e-05	SLC23A1	solute carrier family 23 member 1	15	protein_coding
Up	ENSMGAG00000014444	0.940365	0.00223	IGSF3	immunoglobulin superfamily member 3	1	protein_coding
Up	ENSMGAG00000005003	0.940311	0.0159	PRRX2	paired related homeobox 2 [Source:HGNC Symbol;Acc:HGNC:21338]	19	protein_coding
Up	ENSMGAG00000009784	0.940192	0.00173	TYMS	thymidylate synthetase [Source:HGNC Symbol;Acc:HGNC:12441]	3	protein_coding
Up	ENSMGAG00000001309	0.936774	0.0222	PATL2	PAT1 homolog 2 [Source:HGNC Symbol;Acc:HGNC:33630]	12	protein_coding
Up	ENSMGAG00000007304	0.936171	0.0015	LOC100541650	microtubule-associated tumor suppressor candidate 2	1	protein_coding
Up	ENSMGAG00000012730	0.936157	0.00499	MCM5	minichromosome maintenance complex component 5 [Source:HGNC Symbol;Acc:HGNC:6948]	1	protein_coding
Up	ENSMGAG00000008731	0.935926	0.00239	RHBG	Rh family B glycoprotein	27	protein_coding
Up	ENSMGAG00000005402	0.935839	0.00631	RASAL1	RAS protein activator like 1	17	protein_coding
Up	ENSMGAG00000006539	0.934617	0.038	ST8SIA4	ST8 alpha-N-acetyl-neuraminide alpha-2,8-sialyltransferase 4 [Source:HGNC Symbol;Acc:HGNC:10871]	Z	protein_coding
Up	ENSMGAG00000011500	0.933678	6.05e-05	SLC11A1	solute carrier family 11 member 1 [Source:HGNC Symbol;Acc:HGNC:10907]	7	protein_coding
Up	ENSMGAG00000004395	0.9334	0.00684	LOC100550364	corticosteroid 11-beta-dehydrogenase isozyme 1-like	28	protein_coding
Up	ENSMGAG00000020341	0.931897	0.0216	C4H4orf17	chromosome 4 C4orf17 homolog	4	protein_coding
Up	ENSMGAG00000006722	0.931793	4.96e-06	VAV2	vav guanine nucleotide exchange factor 2 [Source:HGNC Symbol;Acc:HGNC:12658]	19	protein_coding
Up	ENSMGAG00000014350	0.930235	0.000202	DPT	dermatopontin [Source:HGNC Symbol;Acc:HGNC:3011]	1	protein_coding
Up	ENSMGAG00000018164	0.929862	0.0027	C10H14orf80	tubulin epsilon and delta complex 1	10	protein_coding
Up	ENSMGAG00000005991	0.929114	0.00934	UNG	uracil DNA glycosylase [Source:HGNC Symbol;Acc:HGNC:12572]	17	protein_coding
Up	ENSMGAG00000012721	0.928858	0.025	RBM43	RNA binding motif protein 43	7	protein_coding
Up	ENSMGAG00000012667	0.928753	0.0023	VRTN	vertebrae development associated [Source:HGNC Symbol;Acc:HGNC:20223]	5	protein_coding
Up	ENSMGAG00000004086	0.926741	0.0217	ADIPOQ	adiponectin, C1Q and collagen domain containing	11	protein_coding
Up	ENSMGAG00000009081	0.924846	2.71e-06	PRICKLE2	prickle planar cell polarity protein 2 [Source:HGNC Symbol;Acc:HGNC:20340]	14	protein_coding
Up	ENSMGAG00000008492	0.9243	0.00388	ENSMGAG00000008492	pseudogene	1	pseudogene
Up	ENSMGAG00000014888	0.923553	0.0197	NALCN	sodium leak channel, non-selective	1	protein_coding
Up	ENSMGAG00000001425	0.922512	0.00708	SLC9A1	solute carrier family 9 member A1	25	protein_coding
Up	ENSMGAG00000019685	0.921465	0.00439	ENSMGAG00000019685	pseudogene	KN388162.1	pseudogene
Up	ENSMGAG00000007569	0.921397	0.0395	LOC100538440	glutathione S-transferase theta-1-like	17	protein_coding
Up	ENSMGAG00000002661	0.919394	0.0076	LOC104912152	protein FAM162B-like	9	protein_coding
Up	ENSMGAG00000006536	0.918705	0.0153	LOC100540040	interferon regulatory factor 4-like	22	protein_coding
Up	ENSMGAG00000001877	0.917886	1.4e-07	SLC38A7	solute carrier family 38 member 7	13	protein_coding
Up	ENSMGAG00000003344	0.917156	9.77e-06	ENSMGAG00000003344	Uncharacterized protein	8	protein_coding
Up	ENSMGAG00000009629	0.917101	0.021	ENSMGAG00000009629	Uncharacterized protein	18	protein_coding
Up	ENSMGAG00000004206	0.916285	0.00247	AGBL2	ATP/GTP binding protein like 2	5	protein_coding
Up	ENSMGAG00000002693	0.916078	0.042	PROCR	protein C receptor	11	protein_coding
Up	ENSMGAG00000018444	0.915685	0.00354	ENSMGAG00000018444	novel protein coding gene	5	protein_coding
Up	ENSMGAG00000019098	0.915476	0.000363	ENSMGAG00000019098	novel protein coding gene	ADDD02273753.1	protein_coding
Up	ENSMGAG00000009150	0.914282	0.000481	ADAMTS9	ADAM metallopeptidase with thrombospondin type 1 motif 9 [Source:HGNC Symbol;Acc:HGNC:13202]	14	protein_coding
Up	ENSMGAG00000017924	0.913745	0.029	ENSMGAG00000017924	novel protein coding gene	6	protein_coding
Up	ENSMGAG00000022032	0.913293	7.01e-05	PHLDB1	pleckstrin homology like domain family B member 1 [Source:NCBI gene;Acc:419790] ortholog	26	protein_coding
Up	ENSMGAG00000001386	0.913043	0.0105	ENSMGAG00000001386	GRAM domain-containing protein	30	protein_coding
Up	ENSMGAG00000017782	0.912663	0.0165	LOC104911318	uncharacterized LOC104911318	6	protein_coding
Up	ENSMGAG00000006657	0.912234	0.00766	MAP2K6	mitogen-activated protein kinase kinase 6 [Source:HGNC Symbol;Acc:HGNC:6846]	20	protein_coding
Up	ENSMGAG00000007791	0.910624	0.0035	TM6SF1	transmembrane 6 superfamily member 1 [Source:HGNC Symbol;Acc:HGNC:11860]	12	protein_coding
Up	ENSMGAG00000015759	0.910615	0.000118	UBXN10	UBX domain protein 10 [Source:HGNC Symbol;Acc:HGNC:26354]	23	protein_coding
Up	ENSMGAG00000019833	0.909949	0.00181	ENSMGAG00000019833	novel protein coding gene	ADDD02148149.1	protein_coding
Up	ENSMGAG00000022339	0.906188	0.00564	ENSMGAG00000022339	novel protein coding gene	2	protein_coding
Up	ENSMGAG00000019070	0.905944	0.00477	GBGT1	globoside alpha-1,3-N-acetylgalactosaminyltransferase 1 (FORS blood group) [Source:HGNC Symbol;Acc:HGNC:20460]	19	protein_coding
Up	ENSMGAG00000014559	0.905504	0.00264	LCA5L	lebercilin LCA5 like [Source:HGNC Symbol;Acc:HGNC:1255]	1	protein_coding
Up	ENSMGAG00000006358	0.904019	0.0186	TERB1	Telomere repeat binding bouquet formation protein 1	13	protein_coding
Up	ENSMGAG00000011783	0.902049	0.0295	ROR1	receptor tyrosine kinase like orphan receptor 1	10	protein_coding
Up	ENSMGAG00000013829	0.901609	0.00241	FBLN1	fibulin 1 [Source:HGNC Symbol;Acc:HGNC:3600]	1	protein_coding
Up	ENSMGAG00000019006	0.901459	2.08e-06	LOC100542044	cyclin-dependent kinase 2 [ Meleagris gallopavo (turkey) ]	KN387378.1	protein_coding
Up	ENSMGAG00000004662	0.901138	2.42e-05	DIXDC1	DIX domain containing 1 [Source:HGNC Symbol;Acc:HGNC:23695]	26	protein_coding
Up	ENSMGAG00000016169	0.900848	0.000427	ZBTB21	zinc finger and BTB domain containing 21	1	protein_coding
Up	ENSMGAG00000020745	0.900704	0.0138	LOC100548583	sacsin	1	protein_coding
Up	ENSMGAG00000018019	0.900614	0.000787	ENSMGAG00000018019	novel protein coding gene	10	protein_coding
Up	ENSMGAG00000014863	0.899293	0.013	COL4A2	collagen type IV alpha 2 chain [Source:HGNC Symbol;Acc:HGNC:2203]	1	protein_coding
Up	ENSMGAG00000021047	0.899011	0.00325	MID1IP1	MID1 interacting protein 1	ADDD02277979.1	protein_coding
Up	ENSMGAG00000006629	0.89312	0.00439	LOC100540503	zinc transporter ZIP11-like	20	protein_coding
Up	ENSMGAG00000018670	0.893039	0.0144	ENSMGAG00000018670	novel protein coding gene	ADDD02066917.1	protein_coding
Up	ENSMGAG00000007461	0.892762	0.00041	NOTCH1	notch receptor 1 [Source:HGNC Symbol;Acc:HGNC:7881]	19	protein_coding
Up	ENSMGAG00000001314	0.891929	0.0172	LOXL2	lysyl oxidase like 2	24	protein_coding
Up	ENSMGAG00000007055	0.891142	0.0277	ARSG	arylsulfatase G	20	protein_coding
Up	ENSMGAG00000005856	0.891117	2.66e-05	PTPRS	protein tyrosine phosphatase receptor type S [Source:HGNC Symbol;Acc:HGNC:9681]	30	protein_coding
Up	ENSMGAG00000021478	0.889667	0.0156	ENSMGAG00000021478	proline dehydrogenase 1 [Source:NCBI gene;Acc:770734] ortholog	17	protein_coding
Up	ENSMGAG00000003911	0.888245	0.0184	PTTG1IP	pituitary tumor-transforming 1 interacting protein	11	protein_coding
Up	ENSMGAG00000018849	0.887712	0.000296	LOC104915858	leucine-rich repeat-containing protein 51-like [ Meleagris gallopavo (turkey) ]	KN387193.1	protein_coding
Up	ENSMGAG00000012058	0.887345	0.000787	ENSMGAG00000012058	Uncharacterized protein	6	protein_coding
Up	ENSMGAG00000014060	0.887202	0.000524	ENSMGAG00000014060	Uncharacterized protein	2	protein_coding
Up	ENSMGAG00000006938	0.886462	0.000247	FAM20A	FAM20A, golgi associated secretory pathway pseudokinase	20	protein_coding
Up	ENSMGAG00000006076	0.885527	0.000197	SPACA9	sperm acrosome associated 9 [Source:HGNC Symbol;Acc:HGNC:1367]	19	protein_coding
Up	ENSMGAG00000010109	0.885405	0.0246	LMCD1	LIM and cysteine rich domains 1	14	protein_coding
Up	ENSMGAG00000009515	0.884944	0.000806	SCARF2	scavenger receptor class F member 2	17	protein_coding
Up	ENSMGAG00000015308	0.883395	0.00279	SLCO2B1	Solute carrier organic anion transporter family member	1	protein_coding
Up	ENSMGAG00000010670	0.883198	0.038	VEPH1	ventricular zone expressed PH domain containing 1 [Source:HGNC Symbol;Acc:HGNC:25735]	11	protein_coding
Up	ENSMGAG00000013685	0.882051	0.00434	RASSF8	Ras association domain family member 8	1	protein_coding
Up	ENSMGAG00000001662	0.881763	0.00181	LAMC2	laminin subunit gamma 2	10	protein_coding
Up	ENSMGAG00000016032	0.881143	5.38e-05	FZD2	Frizzled class receptor 2	6	protein_coding
Up	ENSMGAG00000008347	0.880939	0.0364	BCL2A1	BCL2 related protein A1 [Source:HGNC Symbol;Acc:HGNC:991]	12	protein_coding
Up	ENSMGAG00000002149	0.878639	0.00702	PLCH2	phospholipase C eta 2 [Source:HGNC Symbol;Acc:HGNC:29037]	23	protein_coding
Up	ENSMGAG00000011410	0.878435	0.038	ENSMGAG00000011410	SET domain-containing protein	2	protein_coding
Up	ENSMGAG00000010399	0.878318	0.000611	DNAH3	dynein axonemal heavy chain 3 [Source:HGNC Symbol;Acc:HGNC:2949]	16	protein_coding
Up	ENSMGAG00000007566	0.877776	0.00923	HES4	hes family bHLH transcription factor 4	23	protein_coding
Up	ENSMGAG00000022162	0.877732	0.018	ELF3	E74 like ETS transcription factor 3	28	protein_coding
Up	ENSMGAG00000010613	0.877473	0.0215	LURAP1	leucine rich adaptor protein 1 [Source:HGNC Symbol;Acc:HGNC:32327]	10	protein_coding
Up	ENSMGAG00000016508	0.876187	0.0195	ENSMGAG00000016508	Ig-like domain-containing protein	18	protein_coding
Up	ENSMGAG00000018287	0.873942	0.0273	ENSMGAG00000018287	novel protein coding gene	19	protein_coding
Up	ENSMGAG00000021502	0.873282	0.00877	ENSMGAG00000021502	novel protein coding gene	13	protein_coding
Up	ENSMGAG00000013220	0.872773	0.00679	RNF24	Ring finger protein 24	4	protein_coding
Up	ENSMGAG00000016197	0.872055	0.0412	LOC100547244	leucine-rich repeat and fibronectin type III domain-containing protein 1-like protein	ADDD02188823.1	protein_coding
Up	ENSMGAG00000006161	0.871886	0.00671	LOC100550711	hexosaminidase D-like	16	protein_coding
Up	ENSMGAG00000003753	0.870692	0.000966	STYXL1	serine/threonine/tyrosine interacting like 1	21	protein_coding
Up	ENSMGAG00000000712	0.870303	0.0024	PLCD3	phospholipase C delta 3 [Source:HGNC Symbol;Acc:HGNC:9061]	29	protein_coding
Up	ENSMGAG00000014715	0.86868	0.00589	MID1	midline 1 [Source:HGNC Symbol;Acc:HGNC:7095]	1	protein_coding
Up	ENSMGAG00000018951	0.864656	0.0272	ENSMGAG00000018951	novel protein coding gene	1	protein_coding
Up	ENSMGAG00000016854	0.864234	0.0028	SPAG17	sperm associated antigen 17 [Source:HGNC Symbol;Acc:HGNC:26620]	1	protein_coding
Up	ENSMGAG00000010696	0.863899	0.0186	LEKR1	leucine, glutamate and lysine rich 1	11	protein_coding
Up	ENSMGAG00000001513	0.863249	0.0381	CACNA2D2	calcium voltage-gated channel auxiliary subunit alpha2delta 2 [Source:HGNC Symbol;Acc:HGNC:1400]	14	protein_coding
Up	ENSMGAG00000000949	0.863149	0.0215	HIC2	HIC ZBTB transcriptional repressor 2	17	protein_coding
Up	ENSMGAG00000013885	0.862171	0.00765	CCND2	cyclin D2	1	protein_coding
Up	ENSMGAG00000006456	0.86208	0.00708	C1QA	complement C1q A chain [Source:HGNC Symbol;Acc:HGNC:1241]	23	protein_coding
Up	ENSMGAG00000011919	0.861902	0.000332	LOC100539980	WD repeat-containing protein 78	10	protein_coding
Up	ENSMGAG00000005944	0.861516	0.00641	ENSMGAG00000005944	Ig-like domain-containing protein	ADDD02162703.1	protein_coding
Up	ENSMGAG00000010527	0.86126	0.0211	NEURL1	neuralized E3 ubiquitin protein ligase 1 [Source:HGNC Symbol;Acc:HGNC:7761]	8	protein_coding
Up	ENSMGAG00000000679	0.859945	0.028	CRYBG2	crystallin beta-gamma domain containing 2 [Source:HGNC Symbol;Acc:HGNC:17295]	25	protein_coding
Up	ENSMGAG00000013676	0.858882	0.00971	WDHD1	WD repeat and HMG-box DNA binding protein 1 [Source:HGNC Symbol;Acc:HGNC:23170]	5	protein_coding
Up	ENSMGAG00000018266	0.858695	0.00172	LRRC46	leucine rich repeat containing 46 [Source:HGNC Symbol;Acc:HGNC:25047]	KN386713.1	protein_coding
Up	ENSMGAG00000006454	0.858411	0.000717	C1QC	complement C1q C chain	23	protein_coding
Up	ENSMGAG00000019912	0.857582	0.000169	ENSMGAG00000019912	novel protein coding gene	KN386889.1	protein_coding
Up	ENSMGAG00000006448	0.856362	0.00045	DNAI2	dynein axonemal intermediate chain 2	20	protein_coding
Up	ENSMGAG00000004596	0.856221	0.00188	LOC100546815	2-phosphoxylose phosphatase 1	11	protein_coding
Up	ENSMGAG00000013780	0.856175	0.00416	FRMD6	FERM domain containing 6	5	protein_coding
Up	ENSMGAG00000000903	0.855878	0.000871	MATK	megakaryocyte-associated tyrosine kinase [Source:HGNC Symbol;Acc:HGNC:6906]	30	protein_coding
Up	ENSMGAG00000005220	0.855695	0.0438	LOC100544203	cadherin-4	22	protein_coding
Up	ENSMGAG00000020417	0.855385	7.55e-05	ENSMGAG00000020417	dehydrogenase/reductase 13 [Source:NCBI gene;Acc:100858939] ortholog	21	protein_coding
Up	ENSMGAG00000021610	0.855344	0.00092	ENSMGAG00000021610	novel protein coding gene	ADDD02096838.1	protein_coding
Up	ENSMGAG00000003962	0.855201	0.0173	DAPK2	Death associated protein kinase 2	12	protein_coding
Up	ENSMGAG00000007242	0.855002	0.00161	HSPG2	heparan sulfate proteoglycan 2	23	protein_coding
Up	ENSMGAG00000011979	0.854852	0.0298	TRIQK	triple QxxK/R motif containing [Source:HGNC Symbol;Acc:HGNC:27828]	3	protein_coding
Up	ENSMGAG00000010796	0.854397	0.0249	TCTE1	t-complex-associated-testis-expressed 1	2	protein_coding
Up	ENSMGAG00000004003	0.854376	0.000234	GAS2L2	growth arrest specific 2 like 2	21	protein_coding
Up	ENSMGAG00000005735	0.853343	0.0113	LOC100544524	signal peptide, CUB and EGF-like domain-containing protein 3	28	protein_coding
Up	ENSMGAG00000002741	0.852874	0.0198	CX3CL1	C-X3-C motif chemokine ligand 1	13	protein_coding
Up	ENSMGAG00000005261	0.852744	0.0105	ADAMTS14	ADAM metallopeptidase with thrombospondin type 1 motif 14 [Source:HGNC Symbol;Acc:HGNC:14899]	8	protein_coding
Up	ENSMGAG00000002478	0.852581	8.02e-07	FANCD2	Fanconi anemia complementation group D2	14	protein_coding
Up	ENSMGAG00000021113	0.85257	0.0396	ENSMGAG00000021113	novel protein coding gene	5	protein_coding
Up	ENSMGAG00000014226	0.852498	1.18e-05	EFHC1	EF-hand domain containing 1	2	protein_coding
Up	ENSMGAG00000000758	0.85167	0.0337	ENSMGAG00000000758	EF-hand calcium binding domain 12	27	protein_coding
Up	ENSMGAG00000020850	0.851143	0.00244	ENSMGAG00000020850	lncRNA	7	lncRNA
Up	ENSMGAG00000002324	0.850891	0.00257	CFAP74	cilia and flagella associated protein 74	23	protein_coding
Up	ENSMGAG00000010926	0.850809	5.69e-06	ERICH6	glutamate rich 6 [Source:HGNC Symbol;Acc:HGNC:28602]	11	protein_coding
Up	ENSMGAG00000012684	0.850308	0.0192	LTBP2	latent transforming growth factor beta binding protein 2 [Source:HGNC Symbol;Acc:HGNC:6715]	5	protein_coding
Up	ENSMGAG00000008835	0.849785	0.0182	GPAT2	glycerol-3-phosphate acyltransferase 2, mitochondrial	KN389326.1	protein_coding
Up	ENSMGAG00000002720	0.848825	0.000169	NFIC	Nuclear factor I C	KN389233.1	protein_coding
Up	ENSMGAG00000001389	0.846884	0.00788	ENSMGAG00000001389	pseudogene	25	pseudogene
Up	ENSMGAG00000021915	0.844423	0.00248	ENSMGAG00000021915	novel protein coding gene	5	protein_coding
Up	ENSMGAG00000005330	0.844363	0.00149	TEKT4	tektin 4	16	protein_coding
Up	ENSMGAG00000016878	0.842518	0.0489	GGACT	gamma-glutamylamine cyclotransferase	1	protein_coding
Up	ENSMGAG00000010528	0.842242	0.000118	FAT4	FAT atypical cadherin 4	4	pseudogene
Up	ENSMGAG00000007892	0.842204	0.00315	LMNB1	lamin B1 [Source:HGNC Symbol;Acc:HGNC:6637]	Z	protein_coding
Up	ENSMGAG00000020709	0.841886	0.000926	ENSMGAG00000020709	novel protein coding gene	3	protein_coding
Up	ENSMGAG00000004985	0.841038	0.00105	SYNC	Syncoilin, intermediate filament protein	25	protein_coding
Up	ENSMGAG00000005784	0.839785	0.000948	TMEM119	transmembrane protein 119 [Source:HGNC Symbol;Acc:HGNC:27884]	17	protein_coding
Up	ENSMGAG00000018339	0.839529	0.00428	TLCD1	TLC domain containing 1 [Source:NCBI gene;Acc:417575] ortholog	21	protein_coding
Up	ENSMGAG00000013512	0.839447	0.0428	LOC100546792	sine oculis-binding protein homolog	2	protein_coding
Up	ENSMGAG00000006081	0.839136	0.0415	UHRF1	ubiquitin like with PHD and ring finger domains 1 [Source:HGNC Symbol;Acc:HGNC:12556]	30	protein_coding
Up	ENSMGAG00000007374	0.837552	0.0467	MCM2	minichromosome maintenance complex component 2 [Source:HGNC Symbol;Acc:HGNC:6944]	14	protein_coding
Up	ENSMGAG00000019036	0.837014	0.0199	ENSMGAG00000019036	novel protein coding gene	5	protein_coding
Up	ENSMGAG00000006234	0.836637	0.00461	RALGDS	ral guanine nucleotide dissociation stimulator	19	protein_coding
Up	ENSMGAG00000021302	0.835697	0.0185	ENSMGAG00000021302	novel protein coding gene	2	protein_coding
Up	ENSMGAG00000006708	0.835289	0.000871	DYNLRB2	dynein light chain roadblock-type 2 [Source:HGNC Symbol;Acc:HGNC:15467]	13	protein_coding
Up	ENSMGAG00000009416	0.835133	2.82e-05	VASN	vasorin [Source:HGNC Symbol;Acc:HGNC:18517]	16	protein_coding
Up	ENSMGAG00000018965	0.835093	0.026	FAM168A	family with sequence similarity 168 member A	1	protein_coding
Up	ENSMGAG00000016921	0.835054	0.000302	ENSMGAG00000016921	RING-type domain-containing protein	16	protein_coding
Up	ENSMGAG00000022784	0.834899	0.005	ENSMGAG00000022784	pseudogene	KN387458.1	pseudogene
Up	ENSMGAG00000000898	0.834794	0.00855	ST3GAL4	ST3 beta-galactoside alpha-2,3-sialyltransferase 4 [Source:HGNC Symbol;Acc:HGNC:10864]	26	protein_coding
Up	ENSMGAG00000015557	0.832336	0.0358	TRIM7	tripartite motif containing 7	18	protein_coding
Up	ENSMGAG00000002819	0.832316	0.0158	ENSMGAG00000002819	Rho-GAP domain-containing protein	8	protein_coding
Up	ENSMGAG00000006085	0.831732	0.0352	PLOD1	procollagen-lysine,2-oxoglutarate 5-dioxygenase 1	23	protein_coding
Up	ENSMGAG00000007982	0.830908	0.00231	SAXO2	stabilizer of axonemal microtubules 2 [Source:HGNC Symbol;Acc:HGNC:33727]	12	protein_coding
Up	ENSMGAG00000002308	0.828464	0.0178	C2CD4C	C2 calcium dependent domain containing 4C	30	protein_coding
Up	ENSMGAG00000009447	0.828113	0.0235	SNAI1	snail family transcriptional repressor 1	22	protein_coding
Up	ENSMGAG00000004152	0.827804	5.78e-05	ARPC1B	actin related protein 2/3 complex subunit 1B	16	protein_coding
Up	ENSMGAG00000002744	0.826946	2.14e-07	TSNAXIP1	translin associated factor X interacting protein 1	13	protein_coding
Up	ENSMGAG00000016906	0.825803	0.0235	ENSMGAG00000016906	Uncharacterized protein	KN388922.1	protein_coding
Up	ENSMGAG00000015475	0.825556	0.0227	CMKLR1	chemerin chemokine-like receptor 1 [Source:HGNC Symbol;Acc:HGNC:2121]	17	protein_coding
Up	ENSMGAG00000017527	0.825479	0.00187	ENSMGAG00000017527	novel protein coding gene	KN386957.1	protein_coding
Up	ENSMGAG00000006514	0.824946	0.00574	STKLD1	serine/threonine kinase like domain containing 1 [Source:HGNC Symbol;Acc:HGNC:28669]	19	protein_coding
Up	ENSMGAG00000018306	0.823555	0.00606	SHISA4	shisa family member 4	ADDD02250203.1	protein_coding
Up	ENSMGAG00000020965	0.822671	0.000237	LRRD1	leucine rich repeats and death domain containing 1	6	protein_coding
Up	ENSMGAG00000022039	0.822099	0.0499	LOC109364634	calponin-1-like [ Meleagris gallopavo (turkey) ]	ADDD02244819.1	protein_coding
Up	ENSMGAG00000009444	0.822084	0.0292	NMRAL1	NmrA like redox sensor 1	16	protein_coding
Up	ENSMGAG00000017246	0.821149	0.0438	CRIP1	cysteine rich protein 1	10	protein_coding
Up	ENSMGAG00000014619	0.820346	0.00804	RPGR	retinitis pigmentosa GTPase regulator [Source:HGNC Symbol;Acc:HGNC:10295]	1	protein_coding
Up	ENSMGAG00000002020	0.81993	0.000911	ENSMGAG00000002020	Uncharacterized protein	Z	protein_coding
Up	ENSMGAG00000002650	0.819301	0.000651	PLEKHA6	pleckstrin homology domain containing A6 [Source:HGNC Symbol;Acc:HGNC:17053]	28	protein_coding
Up	ENSMGAG00000022520	0.81886	0.00942	LOC104917138	uncharacterized LOC104917138	KN389341.1	protein_coding
Up	ENSMGAG00000004651	0.818703	0.00156	CHST3	carbohydrate sulfotransferase 3 [Source:HGNC Symbol;Acc:HGNC:1971]	8	protein_coding
Up	ENSMGAG00000008967	0.818244	0.0486	CAV1	caveolin 1 [Source:HGNC Symbol;Acc:HGNC:1527]	1	protein_coding
Up	ENSMGAG00000007143	0.817906	0.0434	SHC4	SHC adaptor protein 4 [Source:HGNC Symbol;Acc:HGNC:16743]	12	protein_coding
Up	ENSMGAG00000008968	0.817812	0.00133	SNCAIP	synuclein alpha interacting protein [Source:HGNC Symbol;Acc:HGNC:11139]	Z	protein_coding
Up	ENSMGAG00000014633	0.817567	0.0195	ENSMGAG00000014633	Uncharacterized protein	1	protein_coding
Up	ENSMGAG00000002609	0.817503	0.0296	SIGIRR	single Ig and TIR domain containing	5	protein_coding
Up	ENSMGAG00000014527	0.815955	0.00574	GART	phosphoribosylglycinamide formyltransferase, phosphoribosylglycinamide synthetase, phosphoribosylaminoimidazole synthetase	1	protein_coding
Up	ENSMGAG00000001126	0.814392	0.0271	RFX5	regulatory factor X5 [Source:HGNC Symbol;Acc:HGNC:9986]	27	protein_coding
Up	ENSMGAG00000014115	0.813681	1.15e-07	GPR162	G protein-coupled receptor 162 [Source:HGNC Symbol;Acc:HGNC:16693]	1	protein_coding
Up	ENSMGAG00000004363	0.812941	0.00565	MORN3	MORN repeat containing 3 [Source:HGNC Symbol;Acc:HGNC:29807]	17	protein_coding
Up	ENSMGAG00000007821	0.812938	0.000246	GLIPR2	GLI pathogenesis related 2	3	protein_coding
Up	ENSMGAG00000013036	0.81226	0.019	MTFR2	mitochondrial fission regulator 2	2	protein_coding
Up	ENSMGAG00000007690	0.812113	0.0106	ALOX5	arachidonate 5-lipoxygenase	8	protein_coding
Up	ENSMGAG00000002780	0.810494	0.0195	LOC100544972	ADAMTS-like protein 2	10	protein_coding
Up	ENSMGAG00000022711	0.809553	0.0201	ZFHX4	zinc finger homeobox 4 [Source:NCBI gene;Acc:395904] ortholog	3	protein_coding
Up	ENSMGAG00000012568	0.808789	0.0355	CARD10	caspase recruitment domain family member 10 [Source:HGNC Symbol;Acc:HGNC:16422]	1	protein_coding
Up	ENSMGAG00000004616	0.807326	0.025	LRRC43	leucine rich repeat containing 43 [Source:HGNC Symbol;Acc:HGNC:28562]	17	protein_coding
Up	ENSMGAG00000011882	0.806787	0.0155	GSG1	germ cell associated 1 [Source:HGNC Symbol;Acc:HGNC:19716]	1	protein_coding
Up	ENSMGAG00000018454	0.805259	0.0101	KANK3	KN motif and ankyrin repeat domains 3 [Source:NCBI gene;Acc:428321] ortholog	30	protein_coding
Up	ENSMGAG00000019269	0.805127	0.0176	VOPP1	VOPP1 WW domain binding protein [Source:HGNC Symbol;Acc:HGNC:34518]	6	protein_coding
Up	ENSMGAG00000005143	0.804933	0.00994	ENSMGAG00000005143	pseudogene	1	pseudogene
Up	ENSMGAG00000000755	0.804671	0.00641	DCPS	decapping enzyme, scavenger [Source:HGNC Symbol;Acc:HGNC:29812]	26	protein_coding
Up	ENSMGAG00000001285	0.8046	0.0321	SFRP2	secreted frizzled related protein 2 [Source:HGNC Symbol;Acc:HGNC:10777]	4	protein_coding
Up	ENSMGAG00000019644	0.803945	0.00299	ENSMGAG00000019644	novel protein coding gene	2	protein_coding
Up	ENSMGAG00000019756	0.803621	0.00325	LIX1L	limb and CNS expressed 1 like [Source:HGNC Symbol;Acc:HGNC:28715] ortholog	KN388956.1	protein_coding
Up	ENSMGAG00000014136	0.803473	0.00246	DRC1	dynein regulatory complex subunit 1	2	protein_coding
Up	ENSMGAG00000012542	0.803246	0.000265	ENSMGAG00000012542	Tetratricopeptide repeat domain 6	5	protein_coding
Up	ENSMGAG00000021119	0.802992	0.0339	ENSMGAG00000021119	lncRNA	16	lncRNA
Up	ENSMGAG00000018101	0.802666	0.0357	SLC22A18	solute carrier family 22 member 18 [Source:NCBI gene;Acc:423089] ortholog	5	protein_coding
Up	ENSMGAG00000013232	0.802479	0.0385	TMEM178B	transmembrane protein 178B	1	protein_coding
Up	ENSMGAG00000002253	0.802448	7.52e-09	FAM65A	RHO family interacting cell polarization regulator 1	13	protein_coding
Up	ENSMGAG00000001315	0.800119	0.00466	TNFRSF25	TNF receptor superfamily member 25 [Source:HGNC Symbol;Acc:HGNC:11910]	23	protein_coding
Up	ENSMGAG00000015741	0.799546	5.68e-06	TLR6	Toll like receptor 6	4	protein_coding
Up	ENSMGAG00000006443	0.799218	0.00245	C1QB	complement C1q B chain [Source:HGNC Symbol;Acc:HGNC:1242]	23	protein_coding
Up	ENSMGAG00000003311	0.798009	0.0323	RALGAPA2	Ral GTPase activating protein catalytic subunit alpha 2 [Source:HGNC Symbol;Acc:HGNC:16207]	2	protein_coding
Up	ENSMGAG00000014451	0.797023	7.56e-05	BCL9	BCL9 transcription coactivator	1	protein_coding
Up	ENSMGAG00000009123	0.796643	0.0211	LOC100549393	maternal embryonic leucine zipper kinase	1	protein_coding
Up	ENSMGAG00000022409	0.795575	0.0134	ENSMGAG00000022409	novel protein coding gene	23	protein_coding
Up	ENSMGAG00000004775	0.795242	0.0403	SNX20	sorting nexin 20	13	protein_coding
Up	ENSMGAG00000005289	0.794396	7.02e-05	PALD1	phosphatase domain containing paladin 1 [Source:HGNC Symbol;Acc:HGNC:23530]	8	protein_coding
Up	ENSMGAG00000004544	0.792468	0.0352	CFAP251	cilia and flagella associated protein 251 [Source:HGNC Symbol;Acc:HGNC:28506]	17	protein_coding
Up	ENSMGAG00000009686	0.792401	0.00471	WDR90	WD repeat domain 90	16	protein_coding
Up	ENSMGAG00000011109	0.791604	9.18e-05	PLA2R1	phospholipase A2 receptor 1	7	protein_coding
Up	ENSMGAG00000002388	0.791333	0.00014	TCF3	transcription factor 3	30	protein_coding
Up	ENSMGAG00000010755	0.791179	0.0331	PLCH1	phospholipase C eta 1 [Source:HGNC Symbol;Acc:HGNC:29185]	11	protein_coding
Up	ENSMGAG00000004874	0.789561	0.0169	KNTC1	kinetochore associated 1 [Source:HGNC Symbol;Acc:HGNC:17255]	17	protein_coding
Up	ENSMGAG00000007864	0.789556	0.000221	NOL4L	nucleolar protein 4 like	22	protein_coding
Up	ENSMGAG00000006043	0.789439	0.0227	CCDC125	coiled-coil domain containing 125 [Source:HGNC Symbol;Acc:HGNC:28924]	Z	protein_coding
Up	ENSMGAG00000014253	0.788139	0.0274	TRIM45	tripartite motif containing 45	1	protein_coding
Up	ENSMGAG00000000749	0.786919	0.000847	LOC100538959	dihydropyrimidinase-related protein 2	24	protein_coding
Up	ENSMGAG00000013852	0.786319	0.0295	BCL2L14	BCL2 like 14 [Source:HGNC Symbol;Acc:HGNC:16657]	1	protein_coding
Up	ENSMGAG00000003777	0.786203	0.0014	TOR2A	torsin family 2 member A [Source:HGNC Symbol;Acc:HGNC:11996]	19	protein_coding
Up	ENSMGAG00000007564	0.785904	0.00742	CELSR1	cadherin EGF LAG seven-pass G-type receptor 1	1	protein_coding
Up	ENSMGAG00000012281	0.785669	0.00572	LOC100551033	deleted in malignant brain tumors 1 protein-like	1	protein_coding
Up	ENSMGAG00000014173	0.785202	0.00638	PEAR1	platelet endothelial aggregation receptor 1 [Source:HGNC Symbol;Acc:HGNC:33631]	27	protein_coding
Up	ENSMGAG00000017951	0.785132	0.0447	ENSMGAG00000017951	deleted in malignant brain tumors 1 [Source:NCBI gene;Acc:426819] ortholog	1	protein_coding
Up	ENSMGAG00000011533	0.78499	0.0188	FGGY	FGGY carbohydrate kinase domain containing [Source:HGNC Symbol;Acc:HGNC:25610]	10	protein_coding
Up	ENSMGAG00000009147	0.783166	0.0074	EPHB3	EPH receptor B3	11	protein_coding
Up	ENSMGAG00000018535	0.782497	0.0149	ENSMGAG00000018535	pseudogene	KN387929.1	pseudogene
Up	ENSMGAG00000013469	0.780144	0.0335	LOC100547920	cat eye syndrome critical region protein 2-like	1	protein_coding
Up	ENSMGAG00000013068	0.776594	0.0109	NRBP2	Nuclear receptor binding protein 2	KN386425.1	protein_coding
Up	ENSMGAG00000020692	0.776002	0.00581	ENSMGAG00000020692	novel protein coding gene	24	protein_coding
Up	ENSMGAG00000020616	0.775485	0.0238	NEU3	neuraminidase 3 [Source:NCBI gene;Acc:430542] ortholog	1	protein_coding
Up	ENSMGAG00000018224	0.774019	0.0304	ENSMGAG00000018224	ATP-binding cassette, sub-family A (ABC1), member 9 [Source:NCBI gene;Acc:417443] ortholog	20	protein_coding
Up	ENSMGAG00000002578	0.772526	0.0103	ENSMGAG00000002578	C2H2-type domain-containing protein	11	protein_coding
Up	ENSMGAG00000004177	0.771811	0.00492	RHBDF2	rhomboid 5 homolog 2 [Source:HGNC Symbol;Acc:HGNC:20788]	20	protein_coding
Up	ENSMGAG00000010860	0.771796	0.0221	RAP2B	RAP2B, member of RAS oncogene family [Source:HGNC Symbol;Acc:HGNC:9862]	11	protein_coding
Up	ENSMGAG00000007015	0.771551	0.0286	FAM57A	family with sequence similarity 57 member A	21	protein_coding
Up	ENSMGAG00000003607	0.771321	0.0129	PASK	PAS domain containing serine/threonine kinase	11	protein_coding
Up	ENSMGAG00000005839	0.771033	0.00641	KAZN	Kazrin, periplakin interacting protein	23	protein_coding
Up	ENSMGAG00000008078	0.769626	0.0382	HPSE	heparanase	4	protein_coding
Up	ENSMGAG00000000792	0.769479	0.00906	SYT11	synaptotagmin 11 [Source:HGNC Symbol;Acc:HGNC:19239]	27	protein_coding
Up	ENSMGAG00000012220	0.76889	0.0138	NSUN7	NOP2/Sun RNA methyltransferase family member 7 [Source:HGNC Symbol;Acc:HGNC:25857]	4	protein_coding
Up	ENSMGAG00000012138	0.768727	0.00465	ENSMGAG00000012138	Uncharacterized protein	10	protein_coding
Up	ENSMGAG00000014839	0.768551	0.00445	RASA3	RAS p21 protein activator 3 [Source:HGNC Symbol;Acc:HGNC:20331]	1	protein_coding
Up	ENSMGAG00000004416	0.768524	0.00632	ECM2	extracellular matrix protein 2 [Source:HGNC Symbol;Acc:HGNC:3154]	14	protein_coding
Up	ENSMGAG00000022452	0.768321	0.0375	ENSMGAG00000022452	novel protein coding gene	12	protein_coding
Up	ENSMGAG00000010081	0.768234	0.00302	PLD1	phospholipase D1 [Source:HGNC Symbol;Acc:HGNC:9067]	11	protein_coding
Up	ENSMGAG00000008325	0.76759	0.000374	SLC12A9	solute carrier family 12 member 9	11	protein_coding
Up	ENSMGAG00000009527	0.764596	0.0153	LOC100548053	proline dehydrogenase 1, mitochondrial-like	17	protein_coding
Up	ENSMGAG00000002077	0.764344	0.000341	DDHD2	DDHD domain containing 2 [Source:HGNC Symbol;Acc:HGNC:29106]	24	protein_coding
Up	ENSMGAG00000000789	0.76429	0.00408	ACSS2	acyl-CoA synthetase short-chain family member 2	22	protein_coding
Up	ENSMGAG00000010537	0.762733	0.0177	CPM	carboxypeptidase M [Source:HGNC Symbol;Acc:HGNC:2311]	1	protein_coding
Up	ENSMGAG00000014122	0.762022	0.0203	ESCO2	establishment of sister chromatid cohesion N-acetyltransferase 2 [Source:HGNC Symbol;Acc:HGNC:27230]	2	protein_coding
Up	ENSMGAG00000007338	0.761576	0.0442	HCK	HCK proto-oncogene, Src family tyrosine kinase	22	protein_coding
Up	ENSMGAG00000014180	0.761533	0.00155	FZD3	frizzled class receptor 3 [Source:HGNC Symbol;Acc:HGNC:4041]	2	protein_coding
Up	ENSMGAG00000010110	0.760967	0.0312	C10H1orf228	chromosome 10 open reading frame, human C1orf228	10	protein_coding
Up	ENSMGAG00000005204	0.760372	0.0134	MACROH2A2	macroH2A.2 histone [Source:HGNC Symbol;Acc:HGNC:14453]	8	protein_coding
Up	ENSMGAG00000022609	0.760123	0.0447	P3H4	prolyl 3-hydroxylase family member 4 (non-enzymatic) [Source:NCBI gene;Acc:430099] ortholog	29	protein_coding
Up	ENSMGAG00000000733	0.759252	0.0135	SLC26A8	solute carrier family 26 member 8 [Source:HGNC Symbol;Acc:HGNC:14468]	28	protein_coding
Up	ENSMGAG00000015714	0.758922	0.00272	PHETA2	PH domain containing endocytic trafficking adaptor 2 [Source:HGNC Symbol;Acc:HGNC:27161]	1	protein_coding
Up	ENSMGAG00000003411	0.758561	0.00837	SH3TC2	SH3 domain and tetratricopeptide repeats 2	15	pseudogene
Up	ENSMGAG00000015463	0.758271	0.0447	B3GNT4	UDP-GlcNAc:betaGal beta-1,3-N-acetylglucosaminyltransferase 4 [Source:HGNC Symbol;Acc:HGNC:15683]	17	protein_coding
Up	ENSMGAG00000018759	0.758215	0.0384	DPYSL3	dihydropyrimidinase like 3 [Source:NCBI gene;Acc:395154] ortholog	15	protein_coding
Up	ENSMGAG00000020042	0.757758	0.0017	ENSMGAG00000020042	novel protein coding gene	19	protein_coding
Up	ENSMGAG00000010730	0.757692	0.00555	MOB3C	MOB kinase activator 3C	10	protein_coding
Up	ENSMGAG00000000850	0.757597	0.0116	LOC100539172	butyrophilin subfamily 1 member A1-like	30	protein_coding
Up	ENSMGAG00000006330	0.756778	0.0207	ENSMGAG00000006330	Uncharacterized protein	ADDD02098779.1	protein_coding
Up	ENSMGAG00000003116	0.7558	0.0252	PAPPA	pappalysin 1 [Source:HGNC Symbol;Acc:HGNC:8602]	19	protein_coding
Up	ENSMGAG00000015659	0.755424	0.0155	PAQR8	progestin and adipoQ receptor family member 8 [Source:HGNC Symbol;Acc:HGNC:15708]	2	protein_coding
Up	ENSMGAG00000021880	0.754621	0.0289	SLC16A2	solute carrier family 16 member 2 [Source:NCBI gene;Acc:428716] ortholog	ADDD02061920.1	protein_coding
Up	ENSMGAG00000016406	0.754383	0.032	PCDHAC2	Protocadherin alpha subfamily C, 2	15	protein_coding
Up	ENSMGAG00000017583	0.754126	0.00116	PTTG1	PTTG1 regulator of sister chromatid separation, securin	15	protein_coding
Up	ENSMGAG00000020630	0.753848	0.0396	ENSMGAG00000020630	novel protein coding gene	ADDD02125791.1	protein_coding
Up	ENSMGAG00000013465	0.752221	0.00209	PPIL6	peptidylprolyl isomerase like 6	2	protein_coding
Up	ENSMGAG00000013347	0.751877	0.00298	FAM60A	SIN3-HDAC complex associated factor	1	protein_coding
Up	ENSMGAG00000001572	0.751595	0.000214	RFX2	regulatory factor X2	30	protein_coding
Up	ENSMGAG00000014179	0.750317	0.00903	FBXO16	F-box protein 16 [Source:HGNC Symbol;Acc:HGNC:13618]	2	protein_coding
Up	ENSMGAG00000011894	0.750046	0.0097	ZFP36L1	ZFP36 ring finger protein like 1 [Source:HGNC Symbol;Acc:HGNC:1107]	5	protein_coding
Up	ENSMGAG00000010481	0.750035	0.00752	M1AP	meiosis 1 associated protein [Source:HGNC Symbol;Acc:HGNC:25183]	5	protein_coding
Up	ENSMGAG00000011071	0.749626	0.00454	LOC100545322	keratin, type II cytoskeletal cochleal	4	protein_coding
Up	ENSMGAG00000001372	0.748721	1.23e-05	GNB1L	G protein subunit beta 1 like	17	protein_coding
Up	ENSMGAG00000016773	0.748551	0.00526	USP2	ubiquitin specific peptidase 2 [Source:HGNC Symbol;Acc:HGNC:12618]	26	protein_coding
Up	ENSMGAG00000015828	0.746646	0.00312	RSPH9	radial spoke head component 9	2	protein_coding
Up	ENSMGAG00000009179	0.746274	0.0175	CFAP73	Cilia and flagella associated protein 73	17	protein_coding
Up	ENSMGAG00000022480	0.745616	0.0181	ENSMGAG00000022480	pseudogene	KN389326.1	pseudogene
Up	ENSMGAG00000015232	0.745555	0.0158	ANKRD42	Ankyrin repeat domain 42	1	protein_coding
Up	ENSMGAG00000010546	0.743961	0.000932	ANKRD50	ankyrin repeat domain 50 [Source:HGNC Symbol;Acc:HGNC:29223]	4	protein_coding
Up	ENSMGAG00000014153	0.742256	8.04e-06	NCOA1	nuclear receptor coactivator 1 [Source:HGNC Symbol;Acc:HGNC:7668]	2	protein_coding
Up	ENSMGAG00000020094	0.741912	0.00072	ENSMGAG00000020094	lncRNA	16	lncRNA
Up	ENSMGAG00000003287	0.741468	0.00445	ENSMGAG00000003287	Centrosomal protein kizuna (Polo-like kinase 1 substrate 1)	2	protein_coding
Up	ENSMGAG00000003226	0.741105	0.0296	ZP1	zona pellucida glycoprotein 1	5	pseudogene
Up	ENSMGAG00000003341	0.740757	0.0124	CDK2AP1	cyclin dependent kinase 2 associated protein 1 [Source:HGNC Symbol;Acc:HGNC:14002]	17	protein_coding
Up	ENSMGAG00000018781	0.739945	0.00817	ENSMGAG00000018781	lncRNA	30	lncRNA
Up	ENSMGAG00000004272	0.738874	2.68e-05	ODF2	outer dense fiber of sperm tails 2 [Source:HGNC Symbol;Acc:HGNC:8114]	19	protein_coding
Up	ENSMGAG00000010897	0.73846	0.0074	ACSL5	acyl-CoA synthetase long chain family member 5 [Source:HGNC Symbol;Acc:HGNC:16526]	8	protein_coding
Up	ENSMGAG00000011909	0.735723	0.0331	RASL11B	RAS like family 11 member B	4	protein_coding
Up	ENSMGAG00000021329	0.733889	0.0181	SHROOM4	shroom family member 4 [Source:NCBI gene;Acc:777072] ortholog	9	protein_coding
Up	ENSMGAG00000003457	0.733712	0.0447	KNSTRN	kinetochore localized astrin/SPAG5 binding protein	5	protein_coding
Up	ENSMGAG00000007359	0.7329	1.56e-05	AMT	aminomethyltransferase	14	protein_coding
Up	ENSMGAG00000015176	0.731953	0.00657	CFAP300	Cilia- and flagella-associated protein 300	1	protein_coding
Up	ENSMGAG00000001490	0.731684	0.0145	ST3GAL2	ST3 beta-galactoside alpha-2,3-sialyltransferase 2	13	protein_coding
Up	ENSMGAG00000001336	0.731519	0.00838	ENSMGAG00000001336	pseudogene	23	pseudogene
Up	ENSMGAG00000003932	0.730783	0.00541	PARP3	poly(ADP-ribose) polymerase family member 3 [Source:HGNC Symbol;Acc:HGNC:273]	14	protein_coding
Up	ENSMGAG00000005828	0.730454	0.0122	TMEM51	transmembrane protein 51 [Source:HGNC Symbol;Acc:HGNC:25488]	23	protein_coding
Up	ENSMGAG00000006453	0.729464	0.0387	PRKCB	protein kinase C beta	16	protein_coding
Up	ENSMGAG00000001565	0.729453	0.00189	ZDHHC8	zinc finger DHHC-type containing 8	17	protein_coding
Up	ENSMGAG00000010357	0.729402	6.45e-06	MYO18A	myosin XVIIIA	21	protein_coding
Up	ENSMGAG00000002242	0.728313	0.000325	PPCDC	phosphopantothenoylcysteine decarboxylase [Source:HGNC Symbol;Acc:HGNC:28107]	12	protein_coding
Up	ENSMGAG00000009168	0.727936	0.0225	LOC100550618	CMRF35-like molecule 8	20	protein_coding
Up	ENSMGAG00000002711	0.727388	0.0177	PAFAH2	platelet activating factor acetylhydrolase 2	25	protein_coding
Up	ENSMGAG00000019106	0.725156	0.0284	ENSMGAG00000019106	lncRNA	1	lncRNA
Up	ENSMGAG00000010583	0.723401	0.0171	LIMA1	LIM domain and actin binding 1 [Source:HGNC Symbol;Acc:HGNC:24636]	17	protein_coding
Up	ENSMGAG00000003476	0.721996	0.0304	DRC7	dynein regulatory complex subunit 7 [Source:HGNC Symbol;Acc:HGNC:25289]	13	protein_coding
Up	ENSMGAG00000022941	0.721918	0.00268	ENSMGAG00000022941	parkin coregulated	2	protein_coding
Up	ENSMGAG00000007785	0.71788	0.00186	NME5	NME/NM23 family member 5	15	protein_coding
Up	ENSMGAG00000020365	0.716809	0.00374	ENSMGAG00000020365	novel protein coding gene	29	protein_coding
Up	ENSMGAG00000012628	0.716678	0.0159	ZEB2	zinc finger E-box binding homeobox 2	7	protein_coding
Up	ENSMGAG00000001396	0.715981	0.0224	RNF207	ring finger protein 207 [Source:HGNC Symbol;Acc:HGNC:32947]	23	protein_coding
Up	ENSMGAG00000004369	0.715874	0.0194	ENSMGAG00000004369	PLD phosphodiesterase domain-containing protein	16	protein_coding
Up	ENSMGAG00000004606	0.713709	0.00115	DRC3	dynein regulatory complex subunit 3	16	protein_coding
Up	ENSMGAG00000006338	0.71351	0.0346	GBGT1	coiled-coil domain containing 180	19	protein_coding
Up	ENSMGAG00000011229	0.713352	0.0188	MYBL1	MYB proto-oncogene like 1	3	protein_coding
Up	ENSMGAG00000003372	0.712364	1.71e-05	MMP15	matrix metallopeptidase 15	13	protein_coding
Up	ENSMGAG00000002263	0.712052	0.000378	EHHADH	enoyl-CoA hydratase and 3-hydroxyacyl CoA dehydrogenase [Source:HGNC Symbol;Acc:HGNC:3247]	11	protein_coding
Up	ENSMGAG00000014389	0.710314	0.0454	KIAA1524	KIAA1524 ortholog	1	protein_coding
Up	ENSMGAG00000009633	0.709253	0.0389	GPR27	G protein-coupled receptor 27 [Source:HGNC Symbol;Acc:HGNC:4482]	14	protein_coding
Up	ENSMGAG00000001344	0.707906	0.0102	HYDIN	HYDIN, axonemal central pair apparatus protein	13	protein_coding
Up	ENSMGAG00000012392	0.707792	0.0272	DTHD1	death domain containing 1 [Source:HGNC Symbol;Acc:HGNC:37261]	4	protein_coding
Up	ENSMGAG00000004946	0.707019	6.83e-05	FRMD4A	FERM domain containing 4A [Source:HGNC Symbol;Acc:HGNC:25491]	1	protein_coding
Up	ENSMGAG00000014542	0.706291	0.00844	SETD4	SET domain containing 4 [Source:HGNC Symbol;Acc:HGNC:1258]	1	protein_coding
Up	ENSMGAG00000020189	0.705098	0.0225	ENSMGAG00000020189	novel protein coding gene	4	protein_coding
Up	ENSMGAG00000004021	0.704021	0.00852	LOC100548954	aldehyde dehydrogenase family 3 member B1	5	protein_coding
Up	ENSMGAG00000019570	0.70374	8.19e-05	NEK8	NIMA related kinase 8 [Source:HGNC Symbol;Acc:HGNC:13387]	21	protein_coding
Up	ENSMGAG00000011363	0.703239	0.0254	LOC100543837	NADH-cytochrome b5 reductase-like	10	protein_coding
Up	ENSMGAG00000003072	0.702933	0.000586	CCDC92	coiled-coil domain containing 92 [Source:HGNC Symbol;Acc:HGNC:29563]	17	protein_coding
Up	ENSMGAG00000009628	0.702423	0.00247	SERPING1	serpin family G member 1 [Source:HGNC Symbol;Acc:HGNC:1228]	5	protein_coding
Up	ENSMGAG00000009196	0.700454	0.00546	SPATA1	Spermatogenesis associated 1	10	protein_coding
Up	ENSMGAG00000007649	0.699551	0.00124	RAPGEF3	Rap guanine nucleotide exchange factor 3 [Source:HGNC Symbol;Acc:HGNC:16629]	KN389566.1	protein_coding
Up	ENSMGAG00000004399	0.699086	0.00123	DYNC2I2	dynein 2 intermediate chain 2 [Source:HGNC Symbol;Acc:HGNC:28296]	19	protein_coding
Up	ENSMGAG00000009928	0.698622	0.0131	IQCH	IQ motif containing H [Source:HGNC Symbol;Acc:HGNC:25721]	12	protein_coding
Up	ENSMGAG00000001562	0.697381	0.00734	TP73	tumor protein p73 [Source:HGNC Symbol;Acc:HGNC:12003]	23	protein_coding
Up	ENSMGAG00000013782	0.697338	0.00439	PTGER2	prostaglandin E receptor 2 [Source:HGNC Symbol;Acc:HGNC:9594]	5	protein_coding
Up	ENSMGAG00000008832	0.696128	0.0387	CFAP20DC	CFAP20 domain containing [Source:HGNC Symbol;Acc:HGNC:24763]	14	protein_coding
Up	ENSMGAG00000010738	0.695798	0.00639	ENSMGAG00000010738	Uncharacterized protein	12	protein_coding
Up	ENSMGAG00000004577	0.695551	0.00021	RAP1A	RAP1A, member of RAS onco family [Source:NCBI gene (formerly Entrezgene);Acc:100151696]	28	protein_coding
Up	ENSMGAG00000013004	0.695154	0.0105	RHPN1	rhophilin Rho GTPase binding protein 1	3	protein_coding
Up	ENSMGAG00000008932	0.692519	0.0405	IRF1	interferon regulatory factor 1 [Source:HGNC Symbol;Acc:HGNC:6116]	15	protein_coding
Up	ENSMGAG00000010723	0.692309	0.039	GALNT6	polypeptide N-acetylgalactosaminyltransferase 6 [Source:HGNC Symbol;Acc:HGNC:4128]	4	protein_coding
Up	ENSMGAG00000003709	0.691574	0.00162	ENSMGAG00000003709	Guanylate kinase-like domain-containing protein	1	protein_coding
Up	ENSMGAG00000001756	0.691323	0.0335	LOC100538523	tetraspanin-15-like	24	protein_coding
Up	ENSMGAG00000003978	0.6901	0.0249	mmp28	matrix metallopeptidase 28	21	protein_coding
Up	ENSMGAG00000002103	0.688749	0.0406	NCKAP1L	NCK associated protein 1 like	KN389043.1	protein_coding
Up	ENSMGAG00000019454	0.687519	0.0348	ENSMGAG00000019454	novel protein coding gene	23	protein_coding
Up	ENSMGAG00000005071	0.686982	0.0142	ATP13A2	ATPase cation transporting 13A2	23	protein_coding
Up	ENSMGAG00000015303	0.686401	0.0112	DNAJB13	DnaJ heat shock protein family (Hsp40) member B13 [Source:HGNC Symbol;Acc:HGNC:30718]	1	protein_coding
Up	ENSMGAG00000013472	0.686331	0.0109	ENSMGAG00000013472	Uncharacterized protein	2	protein_coding
Up	ENSMGAG00000018125	0.68548	0.0221	PACRG	PARK2 coregulated [Source:NCBI gene;Acc:421576] ortholog	2	protein_coding
Up	ENSMGAG00000003985	0.684776	0.00463	CNN2	Calponin	30	protein_coding
Up	ENSMGAG00000012094	0.683985	0.0204	FKBP9	FKBP prolyl isomerase 9 [Source:HGNC Symbol;Acc:HGNC:3725]	6	protein_coding
Up	ENSMGAG00000000964	0.683142	0.00341	STAB1	stabilin 1 [Source:HGNC Symbol;Acc:HGNC:18628]	14	protein_coding
Up	ENSMGAG00000004214	0.682302	0.000587	RAD51D	RAD51 paralog D	21	protein_coding
Up	ENSMGAG00000003401	0.682123	0.00969	cfap61	cilia and flagella associated protein 61	2	protein_coding
Up	ENSMGAG00000006960	0.681828	0.00485	DUT	deoxyuridine triphosphatase [Source:HGNC Symbol;Acc:HGNC:3078]	12	protein_coding
Up	ENSMGAG00000009156	0.680838	0.0177	FAM169B	family with sequence similarity 169 member B	12	protein_coding
Up	ENSMGAG00000012673	0.678904	0.000657	AKAP12	A-kinase anchoring protein 12 [Source:HGNC Symbol;Acc:HGNC:370]	2	protein_coding
Up	ENSMGAG00000006643	0.678887	0.00347	ARMC4	armadillo repeat containing 4	6	protein_coding
Up	ENSMGAG00000003538	0.676777	0.0146	LOC100543736	ras GTPase-activating protein 4-like	21	protein_coding
Up	ENSMGAG00000002215	0.675566	0.0225	NFATC1	nuclear factor of activated T cells 1 [Source:HGNC Symbol;Acc:HGNC:7775]	3	protein_coding
Up	ENSMGAG00000010808	0.675395	0.00984	HSP90AB1	heat shock protein 90 alpha family class B member 1	2	protein_coding
Up	ENSMGAG00000011134	0.675051	0.00579	ENSMGAG00000011134	Uncharacterized protein	1	protein_coding
Up	ENSMGAG00000012539	0.67494	0.00267	MIPOL1	mirror-image polydactyly 1 [Source:HGNC Symbol;Acc:HGNC:21460]	5	protein_coding
Up	ENSMGAG00000018602	0.674779	0.00261	ENSMGAG00000018602	novel protein coding gene	3	protein_coding
Up	ENSMGAG00000001905	0.674124	0.00272	PAK4	p21 (RAC1) activated kinase 4	KN387764.1	protein_coding
Up	ENSMGAG00000009074	0.67381	0.047	ACSF2	acyl-CoA synthetase family member 2 [Source:HGNC Symbol;Acc:HGNC:26101]	20	protein_coding
Up	ENSMGAG00000012077	0.672508	0.0224	GABRA4	gamma-aminobutyric acid type A receptor subunit alpha4	4	protein_coding
Up	ENSMGAG00000014353	0.672351	0.0174	GPR161	G protein-coupled receptor 161 [Source:HGNC Symbol;Acc:HGNC:23694]	1	protein_coding
Up	ENSMGAG00000002657	0.671037	0.000577	LOC100550264	proto-oncogene tyrosine-protein kinase Yrk	ADDD02243781.1	protein_coding
Up	ENSMGAG00000018150	0.670096	0.0133	MLLT11	MLLT11 transcription factor 7 cofactor [Source:HGNC Symbol;Acc:HGNC:16997]	27	protein_coding
Up	ENSMGAG00000013807	0.668774	0.0185	ARHGAP8	Rho GTPase activating protein 8	1	protein_coding
Up	ENSMGAG00000007915	0.668773	6.48e-06	HNRNPA0	heterogeneous nuclear ribonucleoprotein A0	15	protein_coding
Up	ENSMGAG00000020146	0.668667	0.00492	ENSMGAG00000020146	pseudogene	14	pseudogene
Up	ENSMGAG00000011936	0.6683	0.00539	SGCB	sarcoglycan beta [Source:HGNC Symbol;Acc:HGNC:10806]	4	protein_coding
Up	ENSMGAG00000008086	0.667998	0.0298	CFAP161	cilia and flagella associated protein 161 [Source:HGNC Symbol;Acc:HGNC:26782]	12	protein_coding
Up	ENSMGAG00000019812	0.667609	0.0498	ENSMGAG00000019812	novel protein coding gene	1	protein_coding
Up	ENSMGAG00000004766	0.667297	0.000283	THOC3	THO complex 3 [Source:HGNC Symbol;Acc:HGNC:19072]	15	protein_coding
Up	ENSMGAG00000020010	0.667174	0.000934	CDC42EP4	CDC42 effector protein 4 [Source:HGNC Symbol;Acc:HGNC:17147]	20	protein_coding
Up	ENSMGAG00000018553	0.666765	0.0175	LOC100546305	E3 ubiquitin-protein ligase HECTD3-like	10	protein_coding
Up	ENSMGAG00000013565	0.666744	3.43e-05	TRMT5	tRNA methyltransferase 5 [Source:HGNC Symbol;Acc:HGNC:23141]	5	protein_coding
Up	ENSMGAG00000017885	0.665128	0.00549	ENSMGAG00000017885	novel protein coding gene	Z	protein_coding
Up	ENSMGAG00000001424	0.664041	0.000467	HYAL2	hyaluronoglucosaminidase 2	14	protein_coding
Up	ENSMGAG00000019562	0.66379	0.0126	ENSMGAG00000019562	novel protein coding gene	1	protein_coding
Up	ENSMGAG00000011446	0.663771	0.0132	NTN4	netrin 4 [Source:HGNC Symbol;Acc:HGNC:13658]	1	protein_coding
Up	ENSMGAG00000010499	0.663581	0.000129	RBKS	ribokinase	2	protein_coding
Up	ENSMGAG00000002325	0.663168	0.00219	MEX3D	Mex-3 RNA binding family member D	30	protein_coding
Up	ENSMGAG00000006303	0.660975	0.0256	ANKEF1	ankyrin repeat and EF-hand domain containing 1	2	protein_coding
Up	ENSMGAG00000006305	0.660864	0.0449	LOC100550511	alpha-N-acetylgalactosaminide alpha-2,6-sialyltransferase 2-like	20	protein_coding
Up	ENSMGAG00000015403	0.660353	0.00423	RNF182	ring finger protein 182	3	protein_coding
Up	ENSMGAG00000013101	0.660057	0.00213	NUP210L	nucleoporin 210 like [Source:HGNC Symbol;Acc:HGNC:29915]	KN388070.1	protein_coding
Up	ENSMGAG00000018409	0.659778	0.0321	ENSMGAG00000018409	lncRNA	12	lncRNA
Up	ENSMGAG00000002991	0.659706	0.0101	PLAT	plasminogen activator, tissue type [Source:HGNC Symbol;Acc:HGNC:9051]	24	protein_coding
Up	ENSMGAG00000009024	0.659697	0.00206	PRKAB1	protein kinase AMP-activated non-catalytic subunit beta 1	17	protein_coding
Up	ENSMGAG00000001757	0.659114	0.00719	TMEM144	transmembrane protein 144 [Source:HGNC Symbol;Acc:HGNC:25633]	4	protein_coding
Up	ENSMGAG00000011855	0.657137	0.00284	GALNT16	polypeptide N-acetylgalactosaminyltransferase 16 [Source:HGNC Symbol;Acc:HGNC:23233]	5	protein_coding
Up	ENSMGAG00000015580	0.656583	0.0136	TRIM13	tripartite motif containing 13	1	protein_coding
Up	ENSMGAG00000011920	0.65642	0.0441	GUCY2C	guanylate cyclase 2C [Source:HGNC Symbol;Acc:HGNC:4688]	1	protein_coding
Up	ENSMGAG00000009046	0.655488	0.00316	CCDC60	coiled-coil domain containing 60	17	protein_coding
Up	ENSMGAG00000016195	0.655398	0.0146	NAA80	N(alpha)-acetyltransferase 80, NatH catalytic subunit	14	protein_coding
Up	ENSMGAG00000006324	0.653477	0.0132	SCUBE2	signal peptide, CUB domain and EGF like domain containing 2	5	protein_coding
Up	ENSMGAG00000018044	0.652494	0.0102	ENSMGAG00000018044	lncRNA	1	lncRNA
Up	ENSMGAG00000013462	0.652269	0.00676	CECR1	adenosine deaminase 2	1	protein_coding
Up	ENSMGAG00000007879	0.651852	0.000807	NRK	Nik related kinase	9	protein_coding
Up	ENSMGAG00000012498	0.65143	0.00678	C22orf23	chromosome 22 open reading frame 23 [Source:HGNC Symbol;Acc:HGNC:18589]	1	protein_coding
Up	ENSMGAG00000015782	0.651414	0.0448	ENSMGAG00000015782	CAP-Gly domain-containing protein	19	protein_coding
Up	ENSMGAG00000009411	0.651175	0.0204	LOC100542863	transcription factor AP-4-like	ADDD02196670.1	protein_coding
Up	ENSMGAG00000007068	0.650177	0.0187	LOC100542192	uncharacterized LOC100542192	22	protein_coding
Up	ENSMGAG00000014340	0.649982	0.0123	CCDC80	coiled-coil domain containing 80	1	protein_coding
Up	ENSMGAG00000006800	0.649582	0.00132	PDLIM1	PDZ and LIM domain 1 [Source:HGNC Symbol;Acc:HGNC:2067]	8	protein_coding
Up	ENSMGAG00000002738	0.648072	0.0173	WHRN	Whirlin	19	protein_coding
Up	ENSMGAG00000013487	0.647658	0.00153	DNAL4	dynein axonemal light chain 4 [Source:HGNC Symbol;Acc:HGNC:2955]	1	protein_coding
Up	ENSMGAG00000009800	0.646625	0.0315	COLEC12	collectin subfamily member 12 [Source:HGNC Symbol;Acc:HGNC:16016]	3	protein_coding
Up	ENSMGAG00000007070	0.646614	0.0266	TMEM150A	transmembrane protein 150A	8	protein_coding
Up	ENSMGAG00000018195	0.646248	0.0479	ENSMGAG00000018195	lncRNA	ADDD02254976.1	lncRNA
Up	ENSMGAG00000010317	0.64592	0.0203	PLXND1	plexin D1 [Source:HGNC Symbol;Acc:HGNC:9107]	14	protein_coding
Up	ENSMGAG00000012625	0.64581	0.00293	KCTD17	potassium channel tetramerization domain containing 17 [Source:HGNC Symbol;Acc:HGNC:25705]	1	protein_coding
Up	ENSMGAG00000014203	0.645731	0.000744	EPHB6	ephrin type-B receptor 5	1	protein_coding
Up	ENSMGAG00000002589	0.645613	3.76e-06	NLRX1	NLR family member X1 [Source:HGNC Symbol;Acc:HGNC:29890]	26	protein_coding
Up	ENSMGAG00000014517	0.644944	0.00545	C1H21orf59	cilia and flagella associated protein 298	1	protein_coding
Up	ENSMGAG00000009522	0.644886	0.000177	CASKIN2	CASK interacting protein 2 [Source:HGNC Symbol;Acc:HGNC:18200]	20	protein_coding
Up	ENSMGAG00000000775	0.644146	0.0175	SOGA1	suppressor of glucose, autophagy associated 1	22	protein_coding
Up	ENSMGAG00000010444	0.642918	0.0113	FES	FES proto-oncogene, tyrosine kinase	12	protein_coding
Up	ENSMGAG00000008069	0.641809	0.0352	COQ2	coenzyme Q2, polyprenyltransferase	4	protein_coding
Up	ENSMGAG00000013328	0.641638	0.0115	MAN1A1	mannosidase alpha class 1A member 1	2	protein_coding
Up	ENSMGAG00000013797	0.641636	0.00639	LOC100548480	filamin-A-interacting protein 1	ADDD02161544.1	protein_coding
Up	ENSMGAG00000004483	0.641487	0.00407	RAI1	Retinoic acid induced 1	16	protein_coding
Up	ENSMGAG00000006084	0.64146	0.000807	GPSM2	G protein signaling modulator 2	10	protein_coding
Up	ENSMGAG00000002096	0.641277	0.024	NHSL2	NHS like 2	9	protein_coding
Up	ENSMGAG00000018352	0.640659	0.0184	ENSMGAG00000018352	novel protein coding gene	10	protein_coding
Up	ENSMGAG00000020167	0.640277	0.0467	CCND2	cyclin D2 [Source:NCBI gene;Acc:374047] ortholog	1	protein_coding
Up	ENSMGAG00000014418	0.638901	0.0425	ENSMGAG00000014418	Dynein regulatory complex protein 10	17	protein_coding
Up	ENSMGAG00000003799	0.638332	0.0397	RADIL	Rap associating with DIL domain	16	protein_coding
Up	ENSMGAG00000006464	0.637939	0.0191	TTYH2	tweety family member 2	20	protein_coding
Up	ENSMGAG00000005024	0.637743	0.0433	SLC29A3	solute carrier family 29 member 3 [Source:HGNC Symbol;Acc:HGNC:23096]	8	protein_coding
Up	ENSMGAG00000002071	0.636524	0.00857	PLPP5	phospholipid phosphatase 5 [Source:HGNC Symbol;Acc:HGNC:25026]	24	protein_coding
Up	ENSMGAG00000020967	0.636339	0.00839	NUGGC	nuclear GTPase, germinal center associated [Source:HGNC Symbol;Acc:HGNC:33550]	2	protein_coding
Up	ENSMGAG00000022778	0.634393	0.041	LOC100550420	deleted in malignant brain tumors 1 protein-like [ Meleagris gallopavo (turkey) ]	1	protein_coding
Up	ENSMGAG00000006340	0.633681	0.0246	LOC100547447	acidic mammalian chitinase-like	28	protein_coding
Up	ENSMGAG00000019928	0.632165	0.00391	ENSMGAG00000019928	novel protein coding gene	25	protein_coding
Up	ENSMGAG00000001815	0.632084	0.0482	ENSMGAG00000001815	Uncharacterized protein	Z	protein_coding
Up	ENSMGAG00000015707	0.631515	0.0153	LSM10	LSM10, U7 small nuclear RNA associated	25	protein_coding
Up	ENSMGAG00000009267	0.631385	0.0421	ZNF385B	zinc finger protein 385B [Source:HGNC Symbol;Acc:HGNC:26332]	7	protein_coding
Up	ENSMGAG00000005635	0.631153	0.00984	ENSMGAG00000005635	BMERB domain-containing protein	5	protein_coding
Up	ENSMGAG00000010040	0.630244	0.00903	FNDC3B	fibronectin type III domain containing 3B [Source:HGNC Symbol;Acc:HGNC:24670]	11	protein_coding
Up	ENSMGAG00000009705	0.630078	0.00579	CFAP57	cilia and flagella associated protein 57	10	protein_coding
Up	ENSMGAG00000014674	0.629708	0.0227	CDKL5	cyclin dependent kinase like 5	1	protein_coding
Up	ENSMGAG00000001891	0.629498	0.0266	CLMP	CXADR like membrane protein [Source:HGNC Symbol;Acc:HGNC:24039]	26	protein_coding
Up	ENSMGAG00000020617	0.629403	0.0243	EPHB6	EPH receptor B6 [Source:NCBI gene;Acc:418308] ortholog	1	protein_coding
Up	ENSMGAG00000018418	0.627666	0.0114	PEA15	proliferation and apoptosis adaptor protein 15	ADDD02198357.1	protein_coding
Up	ENSMGAG00000014078	0.626732	2.91e-06	DNMT3A	DNA methyltransferase 3 alpha [Source:HGNC Symbol;Acc:HGNC:2978]	2	protein_coding
Up	ENSMGAG00000014940	0.626208	0.022	LMO7	LIM domain 7 [Source:HGNC Symbol;Acc:HGNC:6646]	1	protein_coding
Up	ENSMGAG00000001235	0.625716	0.00711	EDA	ectodysplasin A [Source:HGNC Symbol;Acc:HGNC:3157]	9	protein_coding
Up	ENSMGAG00000003901	0.625607	0.00226	PITPNM1	phosphatidylinositol transfer protein membrane associated 1	5	protein_coding
Up	ENSMGAG00000010280	0.625342	0.0325	PRKCE	protein kinase C epsilon [Source:HGNC Symbol;Acc:HGNC:9401]	2	protein_coding
Up	ENSMGAG00000012764	0.623723	0.000468	TTLL5	tubulin tyrosine ligase like 5	5	protein_coding
Up	ENSMGAG00000006589	0.622676	0.0232	CD74	CD74 molecule	15	protein_coding
Up	ENSMGAG00000021130	0.622605	0.0211	LOC104915823	histone H2A.V-like [ Meleagris gallopavo (turkey) ]	KN387061.1	protein_coding
Up	ENSMGAG00000000726	0.619556	1.98e-06	RCC2	regulator of chromosome condensation 2 [Source:HGNC Symbol;Acc:HGNC:30297]	23	protein_coding
Up	ENSMGAG00000019024	0.619366	0.0033	NDUFAF3	NADH:ubiquinone oxidoreductase complex assembly factor 3 [Source:HGNC Symbol;Acc:HGNC:29918]	14	protein_coding
Up	ENSMGAG00000001204	0.618996	0.00948	LOC104912128	uncharacterized LOC104912128	9	protein_coding
Up	ENSMGAG00000020664	0.615795	4.64e-05	DBNL	drebrin like	KN386844.1	protein_coding
Up	ENSMGAG00000007930	0.615697	0.00158	TANGO6	transport and golgi organization 6 homolog [Source:HGNC Symbol;Acc:HGNC:25749]	13	protein_coding
Up	ENSMGAG00000017674	0.615297	0.0125	LOC104912188	uncharacterized LOC104912188	9	protein_coding
Up	ENSMGAG00000004864	0.614712	0.00857	LRRC10B	leucine rich repeat containing 10B [Source:HGNC Symbol;Acc:HGNC:37215]	5	protein_coding
Up	ENSMGAG00000014636	0.614193	0.00695	DMD	dystrophin [Source:HGNC Symbol;Acc:HGNC:2928]	1	protein_coding
Up	ENSMGAG00000018722	0.614056	0.0219	LOC104909650	kinesin-like protein KIF6	2	protein_coding
Up	ENSMGAG00000019831	0.613146	0.00088	ENSMGAG00000019831	novel protein coding gene	KN386498.1	protein_coding
Up	ENSMGAG00000007083	0.612417	0.0331	TEX14	testis expressed 14, intercellular bridge forming factor	21	protein_coding
Up	ENSMGAG00000022146	0.611087	0.0387	ENSMGAG00000022146	lncRNA	13	lncRNA
Up	ENSMGAG00000003281	0.610849	0.00524	IFT22	intraflagellar transport 22	21	protein_coding
Up	ENSMGAG00000009663	0.610389	0.0263	RBM41	RNA binding motif protein 41	9	protein_coding
Up	ENSMGAG00000001723	0.6101	0.000206	LAMC1	laminin subunit gamma 1	10	protein_coding
Up	ENSMGAG00000008667	0.608934	0.00759	NQO1	NAD (P)H quinone dehydrogenase 1	13	protein_coding
Up	ENSMGAG00000013515	0.607863	0.000378	BEND3	BEN domain containing 3	2	protein_coding
Up	ENSMGAG00000005001	0.606826	0.0179	IFI30	IFI30 lysosomal thiol reductase [Source:HGNC Symbol;Acc:HGNC:5398]	30	protein_coding
Up	ENSMGAG00000009422	0.606336	0.011	SEPTIN11	septin 11 [Source:HGNC Symbol;Acc:HGNC:25589]	4	protein_coding
Up	ENSMGAG00000012199	0.605988	0.0353	ABCB6	ATP binding cassette subfamily B member 6 (Langereis blood group)	7	protein_coding
Up	ENSMGAG00000018316	0.605293	0.022	ENSMGAG00000018316	novel protein coding gene	18	protein_coding
Up	ENSMGAG00000003626	0.60483	0.000481	ARID5B	AT-rich interaction domain 5B	8	protein_coding
Up	ENSMGAG00000013489	0.604203	0.00537	NUDT14	nudix hydrolase 14 [Source:HGNC Symbol;Acc:HGNC:20141]	5	protein_coding
Up	ENSMGAG00000016777	0.604051	0.0384	TIMP2	TIMP metallopeptidase inhibitor 2	20	protein_coding
Up	ENSMGAG00000003855	0.602366	0.00293	ENSMGAG00000003855	Uncharacterized protein	Z	protein_coding
Up	ENSMGAG00000007324	0.601718	0.00746	XKR7	XK related 7 [Source:HGNC Symbol;Acc:HGNC:23062]	22	protein_coding
Up	ENSMGAG00000014603	0.601533	0.0189	EFHC2	EF-hand domain containing 2 [Source:HGNC Symbol;Acc:HGNC:26233]	1	protein_coding
Up	ENSMGAG00000019827	0.60047	0.00485	ENSMGAG00000019827	novel protein coding gene	19	protein_coding
Up	ENSMGAG00000017830	0.600469	0.00276	LOC100546146	uncharacterized LOC100546146	7	protein_coding
Up	ENSMGAG00000001631	0.599945	0.0286	MTSS2	MTSS I-BAR domain containing 2	13	protein_coding
Up	ENSMGAG00000018831	0.599837	0.0431	ENSMGAG00000018831	lncRNA	3	lncRNA
Up	ENSMGAG00000011042	0.59926	0.0385	CREB3L1	cAMP responsive element binding protein 3 like 1 [Source:HGNC Symbol;Acc:HGNC:18856]	5	protein_coding
Up	ENSMGAG00000006047	0.59896	0.0149	CCDC40	coiled-coil domain containing 40 [Source:HGNC Symbol;Acc:HGNC:26090]	20	protein_coding
Up	ENSMGAG00000015416	0.598351	0.0269	UBALD2	UBA like domain containing 2	20	protein_coding
Up	ENSMGAG00000009101	0.59833	0.00206	SLC25A22	solute carrier family 25 member 22 [Source:HGNC Symbol;Acc:HGNC:19954]	5	protein_coding
Up	ENSMGAG00000009410	0.597904	0.0109	SPATA17	spermatogenesis associated 17 [Source:HGNC Symbol;Acc:HGNC:25184]	2	protein_coding
Up	ENSMGAG00000001467	0.597599	0.0018	LOC104914649	putative nuclease HARBI1	30	protein_coding
Up	ENSMGAG00000007152	0.597329	0.00679	THRA	thyroid hormone receptor alpha	29	protein_coding
Up	ENSMGAG00000003151	0.597129	0.0128	ENKD1	enkurin domain containing 1	13	protein_coding
Up	ENSMGAG00000018838	0.596405	0.0204	BCAR1	BCAR1, Cas family scaffolding protein [Source:NCBI gene;Acc:415691] ortholog	13	protein_coding
Up	ENSMGAG00000014069	0.59588	0.00191	ENSMGAG00000014069	Uncharacterized protein	KN389465.1	protein_coding
Up	ENSMGAG00000020389	0.595688	0.0149	FAM219B	family with sequence similarity 219 member B [Source:HGNC Symbol;Acc:HGNC:24695]	12	protein_coding
Up	ENSMGAG00000003438	0.59556	0.0196	PALM	paralemmin	30	protein_coding
Up	ENSMGAG00000006968	0.595268	0.0178	ENSMGAG00000006968	Uncharacterized protein	23	protein_coding
Up	ENSMGAG00000020476	0.594395	0.0296	ENSMGAG00000020476	MORN repeat containing 5 [Source:NCBI gene;Acc:772256] ortholog	19	protein_coding
Up	ENSMGAG00000020261	0.593594	0.00438	ALMS1	ALMS1 centrosome and basal body associated protein	4	protein_coding
Up	ENSMGAG00000013828	0.593043	0.0199	RIBC2	RIB43A domain with coiled-coils 2	1	protein_coding
Up	ENSMGAG00000019459	0.590488	0.0376	CYB5R2	cytochrome b5 reductase 2 [Source:NCBI gene;Acc:408182] ortholog	5	protein_coding
Up	ENSMGAG00000007260	0.590205	0.0332	SPAG6	sperm associated antigen 6	6	protein_coding
Up	ENSMGAG00000001802	0.589074	0.0155	MAN1C1	mannosidase alpha class 1C member 1	25	protein_coding
Up	ENSMGAG00000010876	0.588995	2.48e-06	OPHN1	oligophrenin 1	9	protein_coding
Up	ENSMGAG00000006334	0.588286	0.0302	ANXA6	annexin A6 [Source:HGNC Symbol;Acc:HGNC:544]	15	protein_coding
Up	ENSMGAG00000010512	0.586973	0.0327	B3GALNT1	beta-1,3-N-acetylgalactosaminyltransferase 1 (globoside blood group)	11	protein_coding
Up	ENSMGAG00000019417	0.586176	0.0141	CD40	CD40 molecule [Source:HGNC Symbol;Acc:HGNC:11919]	22	protein_coding
Up	ENSMGAG00000017537	0.586119	0.0107	ISLR	immunoglobulin superfamily containing leucine rich repeat [Source:HGNC Symbol;Acc:HGNC:6133]	12	protein_coding
Up	ENSMGAG00000010375	0.585066	0.0045	NCAPH	non-SMC condensin I complex subunit H	24	protein_coding
Up	ENSMGAG00000003316	0.584993	0.0114	RNASEL	ribonuclease L	10	protein_coding
Down	ENSMGAG00000007596	-9.70424	1.72e-09	SST	somatostatin [Source:HGNC Symbol;Acc:HGNC:11329]	11	protein_coding
Down	ENSMGAG00000009866	-7.94075	1.39e-11	KCNH1	potassium voltage-gated channel subfamily H member 1	2	protein_coding
Down	ENSMGAG00000007518	-7.49232	5.99e-05	ENSMGAG00000007518	Uncharacterized protein	4	protein_coding
Down	ENSMGAG00000019483	-7.09505	6.87e-07	CORIN	corin, serine peptidase [Source:NCBI gene;Acc:100857733] ortholog	4	protein_coding
Down	ENSMGAG00000009227	-6.89104	1.4e-07	SLC14A2	solute carrier family 14 member 2	Z	protein_coding
Down	ENSMGAG00000012440	-6.48567	4.09e-10	SLC34A2	solute carrier family 34 member 2 [Source:HGNC Symbol;Acc:HGNC:11020]	4	protein_coding
Down	ENSMGAG00000007425	-6.22246	3.25e-06	ENSMGAG00000007425	MFS domain-containing protein	17	protein_coding
Down	ENSMGAG00000009252	-6.18748	8.51e-05	OTOP2	otopetrin 2	20	protein_coding
Down	ENSMGAG00000007496	-6.1874	0.000177	SPP1	secreted phosphoprotein 1	4	protein_coding
Down	ENSMGAG00000017281	-5.79265	0.00811	SLC26A1	Sulfate anion transporter 1 (Solute carrier family 26 member 1)	Z	protein_coding
Down	ENSMGAG00000021246	-5.78349	0.000466	ENSMGAG00000021246	lncRNA	26	lncRNA
Down	ENSMGAG00000017111	-5.57303	0.01	ENSMGAG00000017111	Uncharacterized protein	4	protein_coding
Down	ENSMGAG00000014574	-5.45364	0.000327	TFF2	trefoil factor 2 [Source:HGNC Symbol;Acc:HGNC:11756]	1	protein_coding
Down	ENSMGAG00000021088	-5.32229	3.18e-06	ENSMGAG00000021088	lncRNA	21	lncRNA
Down	ENSMGAG00000014249	-5.28923	0.00168	LOC100548588	cysteine-rich venom protein-like	2	protein_coding
Down	ENSMGAG00000019060	-5.27126	0.00316	ENSMGAG00000019060	novel protein coding gene	8	protein_coding
Down	ENSMGAG00000002759	-5.22395	0.00263	LOC100545133	receptor-type tyrosine-protein phosphatase T	22	protein_coding
Down	ENSMGAG00000012386	-5.16085	7.69e-06	NWD2	NACHT and WD repeat domain containing 2 [Source:HGNC Symbol;Acc:HGNC:29229]	4	protein_coding
Down	ENSMGAG00000013348	-5.1488	0.000737	LOC100551042	asporin-like	2	protein_coding
Down	ENSMGAG00000019429	-5.13573	0.000378	ENSMGAG00000019429	novel protein coding gene	2	protein_coding
Down	ENSMGAG00000014953	-5.0979	0.00508	ENSMGAG00000014953	Protein kinase domain-containing protein	2	protein_coding
Down	ENSMGAG00000018152	-5.07994	6.33e-09	PRLH	prolactin releasing hormone [Source:HGNC Symbol;Acc:HGNC:17945]	7	protein_coding
Down	ENSMGAG00000004592	-5.01869	0.0146	REG4	regenerating family member 4	10	protein_coding
Down	ENSMGAG00000012283	-4.92982	0.000677	ESYT3	extended synaptotagmin 3 [Source:HGNC Symbol;Acc:HGNC:24295]	7	protein_coding
Down	ENSMGAG00000017979	-4.89293	0.00224	ENSMGAG00000017979	novel protein coding gene	21	protein_coding
Down	ENSMGAG00000006756	-4.88075	0.000139	OLFM3	olfactomedin 3	10	protein_coding
Down	ENSMGAG00000010671	-4.78951	0.00102	ENSMGAG00000010671	Uncharacterized protein	5	protein_coding
Down	ENSMGAG00000008956	-4.77012	8.14e-05	ENSMGAG00000008956	pseudogene	16	pseudogene
Down	ENSMGAG00000018161	-4.64054	0.032	XAF1	XIAP associated factor 1	21	protein_coding
Down	ENSMGAG00000018833	-4.60609	0.0386	ENSMGAG00000018833	novel protein coding gene	KN386678.1	protein_coding
Down	ENSMGAG00000006467	-4.54382	0.0166	EPHA8	EPH receptor A8	23	protein_coding
Down	ENSMGAG00000020457	-4.54343	0.0153	ENSMGAG00000020457	lncRNA	9	lncRNA
Down	ENSMGAG00000013186	-4.5136	0.0338	LOC100538367	octopamine receptor-like	4	protein_coding
Down	ENSMGAG00000009487	-4.49646	0.00018	lamp3	lysosomal associated membrane protein 3	11	protein_coding
Down	ENSMGAG00000008699	-4.4689	0.00811	SLC13A5	solute carrier family 13 member 5	21	protein_coding
Down	ENSMGAG00000008161	-4.42522	0.0101	CXCL14	C-X-C motif chemokine ligand 14	15	protein_coding
Down	ENSMGAG00000020531	-4.34734	0.0104	FAM237A	family with sequence similarity 237 member A [Source:HGNC Symbol;Acc:HGNC:52388]	7	protein_coding
Down	ENSMGAG00000002183	-4.31799	0.00766	TNR	tenascin R	10	protein_coding
Down	ENSMGAG00000005517	-4.29059	0.00351	TYRP1	tyrosinase related protein 1 [Source:HGNC Symbol;Acc:HGNC:12450]	Z	protein_coding
Down	ENSMGAG00000000947	-4.27888	1.55e-08	MT4	metallothionein 4 [Source:HGNC Symbol;Acc:HGNC:18705]	13	protein_coding
Down	ENSMGAG00000009979	-4.27281	1.48e-13	LOC100544288	von Willebrand factor D and EGF domain-containing protein-like	6	protein_coding
Down	ENSMGAG00000015701	-4.2624	0.0308	HTR1D	5-hydroxytryptamine receptor 1D	25	protein_coding
Down	ENSMGAG00000012434	-4.25743	1.39e-05	KCNV1	potassium voltage-gated channel modifier subfamily V member 1 [Source:HGNC Symbol;Acc:HGNC:18861]	3	protein_coding
Down	ENSMGAG00000008978	-4.21998	8.02e-07	CYP26A1	cytochrome P450 family 26 subfamily A member 1 [Source:HGNC Symbol;Acc:HGNC:2603]	8	protein_coding
Down	ENSMGAG00000019072	-4.2091	0.00544	STC2	stanniocalcin 2 [Source:HGNC Symbol;Acc:HGNC:11374]	15	protein_coding
Down	ENSMGAG00000013157	-4.16911	0.000976	AKR1D1	aldo-keto reductase family 1 member D1	1	protein_coding
Down	ENSMGAG00000013844	-4.15895	0.00132	B3GAT2	beta-1,3-glucuronyltransferase 2 [Source:HGNC Symbol;Acc:HGNC:922]	2	protein_coding
Down	ENSMGAG00000007253	-4.13523	2.61e-07	KREMEN1	kringle containing transmembrane protein 1	17	protein_coding
Down	ENSMGAG00000008871	-4.12584	3.79e-06	RGS11	regulator of G-protein signaling 11	16	pseudogene
Down	ENSMGAG00000012580	-3.98	4.76e-11	HAS2	hyaluronan synthase 2 [Source:HGNC Symbol;Acc:HGNC:4819]	3	protein_coding
Down	ENSMGAG00000013754	-3.95273	0.00452	LOC100550526	poly (U)-specific endoribonuclease-like	1	protein_coding
Down	ENSMGAG00000013616	-3.8884	9.8e-06	LOC100540824	solute carrier organic anion transporter family member 1C1-like	1	protein_coding
Down	ENSMGAG00000022156	-3.79468	0.00315	DIO2	iodothyronine deiodinase 2	5	protein_coding
Down	ENSMGAG00000014223	-3.7596	0.0252	LOC100545362	uncharacterized LOC100545362	2	protein_coding
Down	ENSMGAG00000000910	-3.73073	9.25e-06	SH2D4B	SH2 domain containing 4B [Source:HGNC Symbol;Acc:HGNC:31440]	8	protein_coding
Down	ENSMGAG00000001959	-3.72757	0.00624	LOC100541714	heme-binding protein 2-like	10	protein_coding
Down	ENSMGAG00000004820	-3.69322	0.000327	ANGPTL7	angiopoietin like 7	23	protein_coding
Down	ENSMGAG00000013759	-3.67759	0.000234	ELOVL4	ELOVL fatty acid elongase 4 [Source:HGNC Symbol;Acc:HGNC:14415]	2	protein_coding
Down	ENSMGAG00000002370	-3.67427	4.28e-06	SPOCK3	SPARC (osteonectin), cwcv and kazal like domains proteoglycan 3 [Source:HGNC Symbol;Acc:HGNC:13565]	4	protein_coding
Down	ENSMGAG00000013618	-3.66423	9.8e-06	SLCO1A2	solute carrier organic anion transporter family member 1A2	1	protein_coding
Down	ENSMGAG00000009610	-3.62145	0.000497	PDK4	pyruvate dehydrogenase kinase 4	6	protein_coding
Down	ENSMGAG00000015170	-3.61895	2.93e-09	LOC100543241	interstitial collagenase-like	1	protein_coding
Down	ENSMGAG00000017044	-3.61848	9.52e-09	EMB	embigin [Source:HGNC Symbol;Acc:HGNC:30465]	Z	protein_coding
Down	ENSMGAG00000018157	-3.61492	0.000137	TCF24	transcription factor 24 [Source:HGNC Symbol;Acc:HGNC:32275]	3	protein_coding
Down	ENSMGAG00000006235	-3.61225	0.0344	CA7	carbonic anhydrase 7	13	protein_coding
Down	ENSMGAG00000004443	-3.60255	4.53e-05	RASD1	ras related dexamethasone induced 1	16	protein_coding
Down	ENSMGAG00000012940	-3.59663	0.00663	ENSMGAG00000012940	Iodothyronine deiodinase	5	protein_coding
Down	ENSMGAG00000015469	-3.58821	0.041	LOC100548817	disintegrin and metalloproteinase domain-containing protein 20-like	17	protein_coding
Down	ENSMGAG00000020699	-3.57267	0.00226	LOC104911914	rho-related BTB domain-containing protein 1-like	8	protein_coding
Down	ENSMGAG00000022911	-3.55952	4.73e-06	CCK	cholecystokinin [Source:HGNC Symbol;Acc:HGNC:1569]	6	protein_coding
Down	ENSMGAG00000006716	-3.54913	0.000534	SCNN1G	sodium channel epithelial 1 subunit gamma [Source:HGNC Symbol;Acc:HGNC:10602]	16	protein_coding
Down	ENSMGAG00000022601	-3.53041	9.65e-05	ENSMGAG00000022601	lncRNA	20	lncRNA
Down	ENSMGAG00000004553	-3.52938	0.0231	PHGDH	phosphoglycerate dehydrogenase	10	protein_coding
Down	ENSMGAG00000001038	-3.52323	0.0427	LOC100551159	pulmonary surfactant-associated protein A-like	8	protein_coding
Down	ENSMGAG00000003384	-3.52068	0.0337	KCNH4	Ether-a-go-go-related gene potassium channel 1 (Potassium voltage-gated channel subfamily H member 2) (Voltage-gated potassium channel subunit Kv11.1)	29	protein_coding
Down	ENSMGAG00000007424	-3.44752	0.00609	PRKG2	protein kinase, cGMP-dependent, type II	4	protein_coding
Down	ENSMGAG00000013129	-3.44679	6.64e-05	ATP6V0A4	ATPase H+ transporting V0 subunit a4	1	protein_coding
Down	ENSMGAG00000013753	-3.43349	0.0257	ENSMGAG00000013753	HSF_DOMAIN domain-containing protein	1	protein_coding
Down	ENSMGAG00000001978	-3.40998	3.37e-10	LOC723980	avidin	Z	protein_coding
Down	ENSMGAG00000012473	-3.40103	2.04e-14	SOD3	superoxide dismutase 3	4	protein_coding
Down	ENSMGAG00000003791	-3.37359	4.31e-05	FGF13	fibroblast growth factor 13 [Source:HGNC Symbol;Acc:HGNC:3670]	9	protein_coding
Down	ENSMGAG00000021337	-3.36755	0.00464	ENSMGAG00000021337	novel protein coding gene	22	protein_coding
Down	ENSMGAG00000015271	-3.33568	0.0295	ENSMGAG00000015271	NAD(P)(+)--arginine ADP-ribosyltransferase (EC 2.4.2.31) (Mono(ADP-ribosyl)transferase)	KN386775.1	protein_coding
Down	ENSMGAG00000009541	-3.32263	0.00035	TMEM117	transmembrane protein 117 [Source:HGNC Symbol;Acc:HGNC:25308]	1	protein_coding
Down	ENSMGAG00000008698	-3.31901	0.00605	ACSL6	acyl-CoA synthetase long chain family member 6	15	protein_coding
Down	ENSMGAG00000012924	-3.29512	2.45e-10	ALDH1L2	aldehyde dehydrogenase 1 family member L2 [Source:HGNC Symbol;Acc:HGNC:26777]	1	protein_coding
Down	ENSMGAG00000004727	-3.2649	0.00211	FREM1	FRAS1 related extracellular matrix 1 [Source:HGNC Symbol;Acc:HGNC:23399]	Z	protein_coding
Down	ENSMGAG00000006682	-3.21907	0.00204	SCNN1B	sodium channel epithelial 1 subunit beta	16	protein_coding
Down	ENSMGAG00000019357	-3.1935	0.0382	ENSMGAG00000019357	lncRNA	KN388162.1	lncRNA
Down	ENSMGAG00000008216	-3.17009	0.013	CNIH3	cornichon family AMPA receptor auxiliary protein 3 [Source:HGNC Symbol;Acc:HGNC:26802]	2	protein_coding
Down	ENSMGAG00000003342	-3.14495	0.00332	MYL10	myosin light chain 10	21	protein_coding
Down	ENSMGAG00000012328	-3.11174	0.0219	TBXT	T-box transcription factor T [Source:HGNC Symbol;Acc:HGNC:11515]	2	protein_coding
Down	ENSMGAG00000002742	-3.10541	0.0282	MIOX	myo-inositol oxygenase [Source:HGNC Symbol;Acc:HGNC:14522]	1	protein_coding
Down	ENSMGAG00000017995	-3.07243	0.000753	CBLN1	cerebellin 1 precursor [Source:NCBI gene;Acc:771265] ortholog	13	protein_coding
Down	ENSMGAG00000020493	-3.05	0.00158	GADD45G	growth arrest and DNA damage inducible gamma [Source:HGNC Symbol;Acc:HGNC:4097]	Z	protein_coding
Down	ENSMGAG00000021768	-3.01627	0.00103	LOC100539847	zinc finger MYM-type protein 3-like	Z	protein_coding
Down	ENSMGAG00000011892	-3.00317	0.00566	SGIP1	SH3GL interacting endocytic adaptor 1 [Source:HGNC Symbol;Acc:HGNC:25412]	10	protein_coding
Down	ENSMGAG00000014589	-2.99629	0.00128	SIK1	salt inducible kinase 1	1	protein_coding
Down	ENSMGAG00000000739	-2.97472	0.000261	ENSMGAG00000000739	POU domain protein	19	protein_coding
Down	ENSMGAG00000006845	-2.94769	0.006	TNFRSF6B	TNF receptor superfamily member 6b	22	protein_coding
Down	ENSMGAG00000016949	-2.93876	0.000946	LOC100540871	keratin, type I cytoskeletal 19-like	29	protein_coding
Down	ENSMGAG00000020032	-2.93496	0.0165	ENSMGAG00000020032	lncRNA	17	lncRNA
Down	ENSMGAG00000013727	-2.91144	0.00239	SNAP91	synaptosome associated protein 91 [Source:HGNC Symbol;Acc:HGNC:14986]	2	protein_coding
Down	ENSMGAG00000014509	-2.89925	0.000271	GRIK1	glutamate ionotropic receptor kainate type subunit 1 [Source:HGNC Symbol;Acc:HGNC:4579]	1	protein_coding
Down	ENSMGAG00000018398	-2.88544	0.0297	MTMR7	myotubularin related protein 7 [Source:NCBI gene;Acc:422731] ortholog	4	protein_coding
Down	ENSMGAG00000010272	-2.86887	0.00901	LRRC31	leucine rich repeat containing 31 [Source:HGNC Symbol;Acc:HGNC:26261]	11	protein_coding
Down	ENSMGAG00000011737	-2.868	6.74e-06	MYRIP	myosin VIIA and Rab interacting protein [Source:HGNC Symbol;Acc:HGNC:19156]	6	protein_coding
Down	ENSMGAG00000007980	-2.86274	8.53e-09	RNF128	ring finger protein 128, E3 ubiquitin protein ligase	9	protein_coding
Down	ENSMGAG00000011940	-2.85971	0.0017	SLC35F3	solute carrier family 35 member F3 [Source:HGNC Symbol;Acc:HGNC:23616]	2	protein_coding
Down	ENSMGAG00000000682	-2.84219	0.0473	TULP1	tubby like protein 1	28	protein_coding
Down	ENSMGAG00000004415	-2.83161	0.000247	BFSP1	beaded filament structural protein 1 [Source:HGNC Symbol;Acc:HGNC:1040]	2	protein_coding
Down	ENSMGAG00000022429	-2.81468	0.00752	ENSMGAG00000022429	lncRNA	9	lncRNA
Down	ENSMGAG00000002984	-2.81336	0.00329	RHOBTB1	Rho related BTB domain containing 1	8	protein_coding
Down	ENSMGAG00000021063	-2.80869	0.0169	ENSMGAG00000021063	lncRNA	KN388162.1	lncRNA
Down	ENSMGAG00000005435	-2.80153	0.00752	GCGR	glucagon receptor	20	protein_coding
Down	ENSMGAG00000004286	-2.7978	0.00366	LOC100545895	vesicle-associated membrane protein 2-like	11	protein_coding
Down	ENSMGAG00000001214	-2.76831	0.0261	LGR6	leucine rich repeat containing G protein-coupled receptor 6	28	protein_coding
Down	ENSMGAG00000017877	-2.75845	0.0311	LOC104916803	V-type proton ATPase subunit G 1-like	ADDD02131090.1	protein_coding
Down	ENSMGAG00000008582	-2.74764	0.00035	ENSMGAG00000008582	Uncharacterized protein	5	protein_coding
Down	ENSMGAG00000020996	-2.737	0.0209	ENSMGAG00000020996	novel protein coding gene	10	protein_coding
Down	ENSMGAG00000021079	-2.73037	7.23e-09	LOC104909729	vacuolar protein 8-like	2	protein_coding
Down	ENSMGAG00000009344	-2.71003	0.0102	ENSMGAG00000009344	spalt like transcription factor 4	22	protein_coding
Down	ENSMGAG00000012465	-2.70867	0.0378	SEPSECS	Sep (O-phosphoserine) tRNA:Sec (selenocysteine) tRNA synthase [Source:HGNC Symbol;Acc:HGNC:30605]	4	protein_coding
Down	ENSMGAG00000016243	-2.6852	1.52e-06	ENSMGAG00000016243	Uncharacterized protein	4	protein_coding
Down	ENSMGAG00000004187	-2.68464	0.00992	PER2	Period circadian regulator 2	11	protein_coding
Down	ENSMGAG00000005453	-2.67974	1.45e-06	GALNT14	Polypeptide N-acetylgalactosaminyltransferase (EC 2.4.1.-) (Protein-UDP acetylgalactosaminyltransferase)	2	protein_coding
Down	ENSMGAG00000013938	-2.67953	9.69e-06	LOC100542307	solute carrier family 2, facilitated glucose transporter member 3	1	protein_coding
Down	ENSMGAG00000019325	-2.66312	3.5e-06	ENSMGAG00000019325	novel protein coding gene	1	protein_coding
Down	ENSMGAG00000022097	-2.64685	4.05e-08	RARRES1	retinoic acid receptor responder 1 [Source:HGNC Symbol;Acc:HGNC:9867]	11	protein_coding
Down	ENSMGAG00000009672	-2.6223	0.00141	CHRD	chordin	11	protein_coding
Down	ENSMGAG00000002472	-2.6221	0.00114	NRSN1	neurensin 1 [Source:HGNC Symbol;Acc:HGNC:17881]	3	protein_coding
Down	ENSMGAG00000012194	-2.6159	3.17e-05	UCHL1	ubiquitin C-terminal hydrolase L1 [Source:HGNC Symbol;Acc:HGNC:12513]	4	protein_coding
Down	ENSMGAG00000001332	-2.56667	0.0353	DEPDC7	DEP domain containing 7 [Source:HGNC Symbol;Acc:HGNC:29899]	5	protein_coding
Down	ENSMGAG00000020984	-2.56233	0.0273	CALCR	calcitonin receptor [Source:NCBI gene;Acc:428425] ortholog	6	protein_coding
Down	ENSMGAG00000002485	-2.55258	0.000101	LOC100543893	TOX high mobility group box family member 2-like	22	protein_coding
Down	ENSMGAG00000022040	-2.55149	0.0013	LOC104916647	histone H2A-like [ Meleagris gallopavo (turkey) ]	ADDD02088255.1	protein_coding
Down	ENSMGAG00000014533	-2.53701	0.00249	RCAN1	regulator of calcineurin 1	1	protein_coding
Down	ENSMGAG00000021375	-2.51709	0.0156	LOC100548864	transcription cofactor HES-6-like	11	protein_coding
Down	ENSMGAG00000002633	-2.49735	1.71e-05	ABCG4	ATP binding cassette subfamily G member 4 [Source:HGNC Symbol;Acc:HGNC:13884]	26	protein_coding
Down	ENSMGAG00000012391	-2.49493	0.00341	COCH	cochlin [Source:HGNC Symbol;Acc:HGNC:2180]	5	protein_coding
Down	ENSMGAG00000003078	-2.49141	3.74e-13	TF	transferrin [Source:NCBI gene (formerly Entrezgene);Acc:100125333]	11	protein_coding
Down	ENSMGAG00000021825	-2.47777	0.0035	ENSMGAG00000021825	novel protein coding gene	5	protein_coding
Down	ENSMGAG00000003835	-2.47376	0.0244	MATN4	matrilin 4 [Source:HGNC Symbol;Acc:HGNC:6910]	22	protein_coding
Down	ENSMGAG00000018664	-2.46691	0.00119	ENSMGAG00000018664	lncRNA	9	lncRNA
Down	ENSMGAG00000006997	-2.4512	0.00541	APOD	apolipoprotein D	11	protein_coding
Down	ENSMGAG00000014202	-2.44194	0.035	LOC100544436	L-threonine 3-dehydrogenase, mitochondrial	2	protein_coding
Down	ENSMGAG00000015527	-2.43124	0.00282	BHLHA15	basic helix-loop-helix family member a15	16	protein_coding
Down	ENSMGAG00000004570	-2.40806	0.0357	HMGCS2	3-hydroxy-3-methylglutaryl-CoA synthase 2	10	protein_coding
Down	ENSMGAG00000004005	-2.40185	0.00755	PFKFB3	6-phosphofructo-2-kinase/fructose-2,6-biphosphatase 3	1	protein_coding
Down	ENSMGAG00000007929	-2.40096	0.00083	UPB1	beta-ureidopropionase 1	17	protein_coding
Down	ENSMGAG00000013281	-2.35497	0.0177	HEY2	hes related family bHLH transcription factor with YRPW motif 2	2	protein_coding
Down	ENSMGAG00000019224	-2.3493	0.00345	NR5A2	nuclear receptor subfamily 5 group A member 2 [Source:NCBI gene;Acc:395961] ortholog	10	protein_coding
Down	ENSMGAG00000012505	-2.34486	0.00383	NFKBIA	NFKB inhibitor alpha	5	protein_coding
Down	ENSMGAG00000015042	-2.32937	2.58e-07	LOC100540211	phosphatidylinositol 3,4,5-trisphosphate 3-phosphatase TPTE2-like	1	protein_coding
Down	ENSMGAG00000004410	-2.32553	7.81e-08	RHOF	ras homolog family member F, filopodia associated [Source:HGNC Symbol;Acc:HGNC:15703]	17	protein_coding
Down	ENSMGAG00000010817	-2.29552	0.00166	HACL1	2-hydroxyacyl-CoA lyase 1 [Source:HGNC Symbol;Acc:HGNC:17856]	6	protein_coding
Down	ENSMGAG00000008568	-2.28187	4.43e-08	SGSM2	small G protein signaling modulator 2 [Source:HGNC Symbol;Acc:HGNC:29026]	21	protein_coding
Down	ENSMGAG00000022366	-2.27798	0.023	ENSMGAG00000022366	novel protein coding gene	22	protein_coding
Down	ENSMGAG00000018163	-2.2715	0.0412	ENSMGAG00000018163	pseudogene	19	pseudogene
Down	ENSMGAG00000009025	-2.26913	0.00116	ENSMGAG00000009025	G_PROTEIN_RECEP_F2_4 domain-containing protein	6	protein_coding
Down	ENSMGAG00000015814	-2.26886	1.92e-05	SLITRK4	SLIT and NTRK like family member 4	9	protein_coding
Down	ENSMGAG00000012213	-2.26334	0.00165	CHADL	chondroadherin like [Source:HGNC Symbol;Acc:HGNC:25165]	1	protein_coding
Down	ENSMGAG00000011727	-2.25491	3.96e-05	DPF3	double PHD fingers 3 [Source:HGNC Symbol;Acc:HGNC:17427]	5	protein_coding
Down	ENSMGAG00000008858	-2.24825	0.000197	ARHGDIG	Rho GDP dissociation inhibitor gamma	16	protein_coding
Down	ENSMGAG00000007472	-2.24804	0.000221	F3	coagulation factor III, tissue factor	10	protein_coding
Down	ENSMGAG00000021818	-2.21618	0.0172	FRMPD1	FERM and PDZ domain containing 1	Z	protein_coding
Down	ENSMGAG00000011827	-2.21454	0.0223	ART4	ADP-ribosyltransferase 4 (inactive) (Dombrock blood group) [Source:HGNC Symbol;Acc:HGNC:726]	1	protein_coding
Down	ENSMGAG00000017173	-2.21039	0.0209	ENSMGAG00000017173	Uncharacterized protein	29	protein_coding
Down	ENSMGAG00000020155	-2.1951	0.00083	ZDHHC2	zinc finger DHHC-type palmitoyltransferase 2	4	protein_coding
Down	ENSMGAG00000012984	-2.19111	0.0348	ARC	activity regulated cytoskeleton associated protein	3	protein_coding
Down	ENSMGAG00000003403	-2.18955	0.0253	ENSMGAG00000003403	LAM_G_DOMAIN domain-containing protein	19	protein_coding
Down	ENSMGAG00000011120	-2.17737	0.00305	SLC4A7	solute carrier family 4 member 7 [Source:HGNC Symbol;Acc:HGNC:11033]	6	protein_coding
Down	ENSMGAG00000022556	-2.1494	0.00122	ENSMGAG00000022556	collagen type XXVII alpha 1 chain [Source:NCBI gene;Acc:417231] ortholog	19	protein_coding
Down	ENSMGAG00000022215	-2.14915	0.0212	DNAJC22	DnaJ heat shock protein family (Hsp40) member C22 [Source:HGNC Symbol;Acc:HGNC:25802]	KN387733.1	protein_coding
Down	ENSMGAG00000001885	-2.14652	1.99e-06	UBE2R2	ubiquitin conjugating enzyme E2 R2	Z	protein_coding
Down	ENSMGAG00000019351	-2.14325	0.038	ENSMGAG00000019351	lncRNA	1	lncRNA
Down	ENSMGAG00000010608	-2.12804	0.0153	GAREM1	GRB2 associated regulator of MAPK1 subtype 1	3	protein_coding
Down	ENSMGAG00000017531	-2.12716	0.0274	LOC100548930	GTP-binding protein Di-Ras2-like [ Meleagris gallopavo (turkey) ]	ADDD02236442.1	protein_coding
Down	ENSMGAG00000001770	-2.10469	0.0189	MEGF6	multiple EGF like domains 6 [Source:HGNC Symbol;Acc:HGNC:3232]	23	protein_coding
Down	ENSMGAG00000009265	-2.10366	0.000167	NRCAM	neuronal cell adhesion molecule [Source:HGNC Symbol;Acc:HGNC:7994]	1	protein_coding
Down	ENSMGAG00000019711	-2.10352	0.00791	ENSMGAG00000019711	novel protein coding gene	1	protein_coding
Down	ENSMGAG00000015768	-2.0957	0.0102	RNF208	ring finger protein 208 [Source:HGNC Symbol;Acc:HGNC:25420]	19	protein_coding
Down	ENSMGAG00000002551	-2.08016	0.0421	IL13RA2	interleukin-13 receptor subunit alpha-2	9	protein_coding
Down	ENSMGAG00000022807	-2.07929	0.0324	EDIL3	EGF like repeats and discoidin domains 3 [Source:HGNC Symbol;Acc:HGNC:3173]	Z	protein_coding
Down	ENSMGAG00000009365	-2.0775	0.000241	ALDH1A3	aldehyde dehydrogenase 1 family member A3 [Source:HGNC Symbol;Acc:HGNC:409]	12	protein_coding
Down	ENSMGAG00000007958	-2.06932	0.000877	ADORA2A	adenosine A2a receptor	17	protein_coding
Down	ENSMGAG00000002682	-2.0615	4.05e-07	HINFP	histone H4 transcription factor [Source:HGNC Symbol;Acc:HGNC:17850]	26	protein_coding
Down	ENSMGAG00000018605	-2.05758	0.000175	DYNC1I1	dynein cytoplasmic 1 intermediate chain 1 [Source:NCBI gene;Acc:420571] ortholog	6	protein_coding
Down	ENSMGAG00000016899	-2.04684	0.00553	CLCN2	chloride voltage-gated channel 2 [Source:HGNC Symbol;Acc:HGNC:2020]	11	protein_coding
Down	ENSMGAG00000019337	-1.99762	0.000238	MT2A	uncharacterized MT2A [ Meleagris gallopavo (turkey) ]	13	protein_coding
Down	ENSMGAG00000008812	-1.98375	0.0452	AGBL1	ATP/GTP binding protein like 1 [Source:HGNC Symbol;Acc:HGNC:26504]	12	protein_coding
Down	ENSMGAG00000021795	-1.98267	4.82e-08	KCNK13	potassium two pore domain channel subfamily K member 13 [Source:HGNC Symbol;Acc:HGNC:6275]	5	protein_coding
Down	ENSMGAG00000012983	-1.9809	0.000153	GALC	galactosylceramidase [Source:HGNC Symbol;Acc:HGNC:4115]	5	protein_coding
Down	ENSMGAG00000013146	-1.95849	0.00261	SVOPL	SVOP like	1	protein_coding
Down	ENSMGAG00000022567	-1.94501	0.0348	ENSMGAG00000022567	novel protein coding gene	3	protein_coding
Down	ENSMGAG00000009657	-1.94393	0.000327	LOC100541356	cytoplasmic dynein 1 intermediate chain 1-like	6	protein_coding
Down	ENSMGAG00000006089	-1.93061	0.0464	GNAQ	G protein subunit alpha q [Source:HGNC Symbol;Acc:HGNC:4390]	Z	protein_coding
Down	ENSMGAG00000005251	-1.92005	0.0185	SERPINF2	serpin family F member 2	21	protein_coding
Down	ENSMGAG00000010572	-1.91709	0.000103	FGF2	fibroblast growth factor 2 [Source:HGNC Symbol;Acc:HGNC:3676]	4	protein_coding
Down	ENSMGAG00000005733	-1.90652	0.00207	PIP5K1B	phosphatidylinositol-4-phosphate 5-kinase type 1 beta	Z	protein_coding
Down	ENSMGAG00000000914	-1.90219	1.5e-06	ALPK3	Alpha kinase 3	12	protein_coding
Down	ENSMGAG00000003569	-1.89468	0.0357	HHIP	hedgehog interacting protein [Source:HGNC Symbol;Acc:HGNC:14866]	4	protein_coding
Down	ENSMGAG00000002605	-1.89322	0.00171	RNF144B	ring finger protein 144B [Source:HGNC Symbol;Acc:HGNC:21578]	3	protein_coding
Down	ENSMGAG00000015044	-1.88096	5.7e-08	COG6	component of oligomeric golgi complex 6 [Source:HGNC Symbol;Acc:HGNC:18621]	1	protein_coding
Down	ENSMGAG00000003620	-1.85081	0.000816	SLC20A1	solute carrier family 20 member 1 [Source:HGNC Symbol;Acc:HGNC:10946]	24	protein_coding
Down	ENSMGAG00000010824	-1.84276	4.42e-05	PRSS12	serine protease 12 [Source:HGNC Symbol;Acc:HGNC:9477]	4	protein_coding
Down	ENSMGAG00000006896	-1.82133	0.00759	STMN3	stathmin 3	22	protein_coding
Down	ENSMGAG00000007867	-1.82051	0.000365	IL1RAPL2	interleukin 1 receptor accessory protein like 2	9	protein_coding
Down	ENSMGAG00000011579	-1.81216	0.0469	LOC100551000	myotubularin-related protein 7-like	4	protein_coding
Down	ENSMGAG00000021665	-1.79747	0.0206	ENSMGAG00000021665	lncRNA	2	lncRNA
Down	ENSMGAG00000007360	-1.79701	0.000675	KIAA0513	KIAA0513 ortholog	13	protein_coding
Down	ENSMGAG00000007011	-1.77505	0.00918	LNPEP	Aminopeptidase (EC 3.4.11.-)	Z	protein_coding
Down	ENSMGAG00000009627	-1.769	0.00869	LOXL4	lysyl oxidase like 4 [Source:HGNC Symbol;Acc:HGNC:17171]	8	protein_coding
Down	ENSMGAG00000001400	-1.76686	1.28e-12	HEXB	Beta-N-acetylhexosaminidase (EC 3.2.1.52)	Z	protein_coding
Down	ENSMGAG00000003865	-1.75775	0.00752	CSRNP1	cysteine and serine rich nuclear protein 1 [Source:HGNC Symbol;Acc:HGNC:14300]	6	protein_coding
Down	ENSMGAG00000005363	-1.73114	0.00619	MLANA	melan-A [Source:HGNC Symbol;Acc:HGNC:7124]	Z	protein_coding
Down	ENSMGAG00000015930	-1.72908	0.0219	PRSS35	serine protease 35 [Source:HGNC Symbol;Acc:HGNC:21387]	2	protein_coding
Down	ENSMGAG00000005465	-1.72734	2.56e-05	CDH18	cadherin 18	3	protein_coding
Down	ENSMGAG00000013331	-1.7262	7.59e-05	LOC100541494	protein bicaudal D homolog 1	1	protein_coding
Down	ENSMGAG00000014757	-1.70767	2.74e-05	SLC9A7	solute carrier family 9 member A7	1	protein_coding
Down	ENSMGAG00000006695	-1.70308	7.81e-08	PDE3B	phosphodiesterase 3B	5	protein_coding
Down	ENSMGAG00000019603	-1.69984	0.000325	PPP2R2C	protein phosphatase 2 regulatory subunit Bgamma [Source:NCBI gene;Acc:422858] ortholog	4	protein_coding
Down	ENSMGAG00000002378	-1.68798	7.53e-06	SYT15	synaptotagmin 15	8	protein_coding
Down	ENSMGAG00000022064	-1.6795	0.0083	ENSMGAG00000022064	lncRNA	Z	lncRNA
Down	ENSMGAG00000010279	-1.67826	0.00037	WIF1	WNT inhibitory factor 1 [Source:HGNC Symbol;Acc:HGNC:18081]	1	protein_coding
Down	ENSMGAG00000004342	-1.66048	0.0158	ENSMGAG00000004342	pseudogene	14	pseudogene
Down	ENSMGAG00000019144	-1.65492	0.00259	ENSMGAG00000019144	novel protein coding gene	Z	protein_coding
Down	ENSMGAG00000011412	-1.65027	0.0183	KIF26B	kinesin family member 26B	2	protein_coding
Down	ENSMGAG00000013381	-1.6431	0.0471	TRAPPC3L	trafficking protein particle complex 3 like	2	protein_coding
Down	ENSMGAG00000012862	-1.6399	0.0477	LOC100550642	protein NDRG1-like	3	protein_coding
Down	ENSMGAG00000013118	-1.63515	0.00167	LOC100541500	serine/threonine-protein kinase Sgk1	2	protein_coding
Down	ENSMGAG00000021975	-1.63416	0.000951	LOC100539092	prostatic acid phosphatase-like [ Meleagris gallopavo (turkey) ]	6	protein_coding
Down	ENSMGAG00000009075	-1.6326	0.0315	LOC100549996	cyclin-I-like	15	protein_coding
Down	ENSMGAG00000022370	-1.63094	0.0406	ENSMGAG00000022370	novel protein coding gene	3	protein_coding
Down	ENSMGAG00000012141	-1.63087	1.17e-05	MATN2	matrilin 2 [Source:HGNC Symbol;Acc:HGNC:6908]	3	protein_coding
Down	ENSMGAG00000020300	-1.62267	0.000202	ENSMGAG00000020300	novel protein coding gene	7	protein_coding
Down	ENSMGAG00000005952	-1.62173	0.000152	SPHKAP	SPHK1 interactor, AKAP domain containing	11	protein_coding
Down	ENSMGAG00000016578	-1.61152	0.00443	NT5DC4	5'-nucleotidase domain containing 4	24	protein_coding
Down	ENSMGAG00000018889	-1.60669	0.00463	RRBP1	ribosome binding protein 1 [Source:NCBI gene;Acc:396414] ortholog	2	protein_coding
Down	ENSMGAG00000022641	-1.60249	0.0221	KLF9	Kruppel like factor 9 [Source:NCBI gene;Acc:770238] ortholog	Z	protein_coding
Down	ENSMGAG00000018752	-1.60238	0.000956	ENSMGAG00000018752	novel protein coding gene	11	protein_coding
Down	ENSMGAG00000003387	-1.59144	0.0004	PLCD1	phospholipase C delta 1 [Source:HGNC Symbol;Acc:HGNC:9060]	6	protein_coding
Down	ENSMGAG00000006732	-1.58863	0.002	MELTF	melanotransferrin	11	protein_coding
Down	ENSMGAG00000021797	-1.58361	0.0291	LOC100549614	transmembrane protein 68-like	3	protein_coding
Down	ENSMGAG00000013002	-1.58184	0.0198	PTPN21	protein tyrosine phosphatase non-receptor type 21 [Source:HGNC Symbol;Acc:HGNC:9651]	5	protein_coding
Down	ENSMGAG00000017736	-1.58061	0.0034	LOC100540418	BPI fold-containing family C protein-like [ Meleagris gallopavo (turkey) ]	1	protein_coding
Down	ENSMGAG00000004516	-1.57209	0.00771	GATA3	GATA binding protein 3 [Source:HGNC Symbol;Acc:HGNC:4172]	1	protein_coding
Down	ENSMGAG00000012221	-1.57069	0.0051	RASGRP1	RAS guanyl releasing protein 1	5	protein_coding
Down	ENSMGAG00000009777	-1.56853	0.0346	LOC100548321	pendrin	1	protein_coding
Down	ENSMGAG00000012805	-1.56215	4.79e-05	RTCB	RNA 2',3'-cyclic phosphate and 5'-OH ligase	1	protein_coding
Down	ENSMGAG00000020439	-1.56096	0.00429	ENSMGAG00000020439	novel protein coding gene	22	protein_coding
Down	ENSMGAG00000004329	-1.56049	0.0156	GALR2	galanin receptor 2	20	protein_coding
Down	ENSMGAG00000009016	-1.55972	0.000235	cracr2b	calcium release activated channel regulator 2B	5	protein_coding
Down	ENSMGAG00000017778	-1.55384	0.0142	LOC104914065	pendrin-like	1	protein_coding
Down	ENSMGAG00000022507	-1.55302	0.022	NUAK2	NUAK family kinase 2	28	protein_coding
Down	ENSMGAG00000003913	-1.551	0.00168	PLA2G15	phospholipase A2 group XV	13	protein_coding
Down	ENSMGAG00000022972	-1.54963	0.00035	SLCO4C1	solute carrier organic anion transporter family member 4C1 [Source:HGNC Symbol;Acc:HGNC:23612]	Z	protein_coding
Down	ENSMGAG00000012457	-1.54776	8.84e-09	PI4K2B	phosphatidylinositol 4-kinase type 2 beta [Source:HGNC Symbol;Acc:HGNC:18215]	4	protein_coding
Down	ENSMGAG00000019863	-1.53995	0.0235	ENSMGAG00000019863	lncRNA	7	lncRNA
Down	ENSMGAG00000006317	-1.53751	0.0425	DRAXIN	dorsal inhibitory axon guidance protein [Source:HGNC Symbol;Acc:HGNC:25054]	23	protein_coding
Down	ENSMGAG00000006006	-1.53515	0.0106	ENGASE	Mannosyl-glycoprotein endo-beta-N-acetylglucosaminidase (EC 3.2.1.96)	20	protein_coding
Down	ENSMGAG00000013855	-1.5295	0.00187	DUSP16	dual specificity phosphatase 16 [Source:HGNC Symbol;Acc:HGNC:17909]	1	protein_coding
Down	ENSMGAG00000001333	-1.51929	0.00143	LOC100546469	ectonucleoside triphosphate diphosphohydrolase 8	19	protein_coding
Down	ENSMGAG00000006816	-1.51684	0.0202	LOC104909525	ribosome-binding protein 1-like	2	protein_coding
Down	ENSMGAG00000007195	-1.51606	0.00659	PLPPR4	phospholipid phosphatase related 4 [Source:HGNC Symbol;Acc:HGNC:23496]	10	protein_coding
Down	ENSMGAG00000004143	-1.51567	9.25e-06	MYOC	Myocilin (Myocilin 20 kDa N-terminal fragment) (Myocilin 35 kDa N-terminal fragment) (Myocilin, C-terminal fragment) (Myocilin, N-terminal fragment)	10	protein_coding
Down	ENSMGAG00000016678	-1.51477	0.0074	IL6	interleukin 6	6	protein_coding
Down	ENSMGAG00000008044	-1.51354	0.00407	EPHX1	epoxide hydrolase 1 [Source:HGNC Symbol;Acc:HGNC:3401]	2	protein_coding
Down	ENSMGAG00000013094	-1.50956	0.05	TC2N	tandem C2 domains, nuclear [Source:HGNC Symbol;Acc:HGNC:19859]	5	protein_coding
Down	ENSMGAG00000014449	-1.50613	1.82e-13	POGLUT1	protein O-glucosyltransferase 1	1	protein_coding
Down	ENSMGAG00000012354	-1.49786	0.000352	LOC100538841	inactive dipeptidyl peptidase 10	7	protein_coding
Down	ENSMGAG00000022342	-1.49657	0.0398	GRP	gastrin releasing peptide	Z	protein_coding
Down	ENSMGAG00000021254	-1.49547	0.00493	5_8S_rRNA	5.8S ribosomal RNA [Source:RFAM;Acc:RF00002]	ADDD02259091.1	rRNA
Down	ENSMGAG00000015153	-1.48946	0.0409	SLC35F2	solute carrier family 35 member F2	1	protein_coding
Down	ENSMGAG00000022454	-1.48892	0.00855	ENSMGAG00000022454	novel protein coding gene	4	protein_coding
Down	ENSMGAG00000011803	-1.48813	8.39e-08	ERO1B	endoplasmic reticulum oxidoreductase 1 beta [Source:HGNC Symbol;Acc:HGNC:14355]	2	protein_coding
Down	ENSMGAG00000000827	-1.48756	0.0283	L3MBTL1	L3MBTL histone methyl-lysine binding protein 1	22	protein_coding
Down	ENSMGAG00000010673	-1.4818	0.00733	SLC39A13	solute carrier family 39 member 13	5	protein_coding
Down	ENSMGAG00000004978	-1.48015	0.0448	EPB42	erythrocyte membrane protein band 4.2	22	protein_coding
Down	ENSMGAG00000009879	-1.47885	0.00367	SMAD3	SMAD family member 3 [Source:HGNC Symbol;Acc:HGNC:6769]	12	protein_coding
Down	ENSMGAG00000002222	-1.47483	0.0354	ENSMGAG00000002222	Uncharacterized protein	30	protein_coding
Down	ENSMGAG00000006225	-1.46877	0.0295	PLAU	plasminogen activator, urokinase	8	protein_coding
Down	ENSMGAG00000001988	-1.46505	0.0296	LUZP2	leucine zipper protein 2	5	protein_coding
Down	ENSMGAG00000005884	-1.46386	0.0111	LOC100543301	bifunctional 3'-phosphoadenosine 5'-phosphosulfate synthase 1	4	protein_coding
Down	ENSMGAG00000015914	-1.46183	2.04e-10	B3GNT2	UDP-GlcNAc:betaGal beta-1,3-N-acetylglucosaminyltransferase 2 [Source:HGNC Symbol;Acc:HGNC:15629]	2	protein_coding
Down	ENSMGAG00000012428	-1.45717	0.00726	SYBU	syntabulin	3	protein_coding
Down	ENSMGAG00000012215	-1.45575	0.0188	RANGAP1	Ran GTPase activating protein 1 [Source:HGNC Symbol;Acc:HGNC:9854]	1	protein_coding
Down	ENSMGAG00000002730	-1.45485	0.0428	SYT12	synaptotagmin 12	5	protein_coding
Down	ENSMGAG00000007117	-1.45321	0.0379	KLHL36	kelch like family member 36 [Source:HGNC Symbol;Acc:HGNC:17844]	13	protein_coding
Down	ENSMGAG00000002439	-1.45258	0.00307	TMEM132D	transmembrane protein 132D	17	protein_coding
Down	ENSMGAG00000001276	-1.4518	5.15e-08	SLC25A37	solute carrier family 25 member 37	24	protein_coding
Down	ENSMGAG00000004661	-1.44953	0.0245	ENSMGAG00000004661	Calcium-transporting ATPase (EC 7.2.2.10)	14	protein_coding
Down	ENSMGAG00000014003	-1.44897	0.0015	SCNN1A	sodium channel epithelial 1 subunit alpha	1	protein_coding
Down	ENSMGAG00000008156	-1.4459	0.0114	BMPR2	bone morphogenetic protein receptor type 2 [Source:HGNC Symbol;Acc:HGNC:1078]	7	protein_coding
Down	ENSMGAG00000022948	-1.44066	0.0215	CRABP1	cellular retinoic acid binding protein 1 [Source:HGNC Symbol;Acc:HGNC:2338]	12	protein_coding
Down	ENSMGAG00000007104	-1.43703	0.0496	COTL1	coactosin like F-actin binding protein 1 [Source:HGNC Symbol;Acc:HGNC:18304]	13	protein_coding
Down	ENSMGAG00000017538	-1.43514	0.045	ENSMGAG00000017538	novel protein coding gene	ADDD02081265.1	protein_coding
Down	ENSMGAG00000011962	-1.43379	0.00349	EPDR1	Ependymin related 1	6	protein_coding
Down	ENSMGAG00000018689	-1.43193	0.0108	RAB18	RAB18, member RAS oncogene family [Source:NCBI gene;Acc:420483] ortholog	29	protein_coding
Down	ENSMGAG00000006648	-1.42846	0.0235	KCNJ2	potassium inwardly rectifying channel subfamily J member 2	20	protein_coding
Down	ENSMGAG00000005374	-1.42818	1.12e-05	ERMP1	endoplasmic reticulum metallopeptidase 1 [Source:HGNC Symbol;Acc:HGNC:23703]	Z	protein_coding
Down	ENSMGAG00000004423	-1.42665	1.48e-13	HYOU1	hypoxia up-regulated 1	26	protein_coding
Down	ENSMGAG00000003018	-1.4224	0.000323	PRLR	prolactin receptor [Source:NCBI gene (formerly Entrezgene);Acc:100126248]	Z	protein_coding
Down	ENSMGAG00000012912	-1.42126	0.026	LOC100303670	hepatocyte growth factor activator	4	protein_coding
Down	ENSMGAG00000005875	-1.4207	0.0034	COL9A3	collagen type IX alpha 3 chain	22	protein_coding
Down	ENSMGAG00000007777	-1.42054	0.0298	ZNF462	zinc finger protein 462 [Source:HGNC Symbol;Acc:HGNC:21684]	Z	protein_coding
Down	ENSMGAG00000012262	-1.41842	0.0203	TEF	TEF transcription factor, PAR bZIP family member [Source:HGNC Symbol;Acc:HGNC:11722]	1	protein_coding
Down	ENSMGAG00000007021	-1.41598	0.015	LOC100542634	probable G-protein coupled receptor 158	6	protein_coding
Down	ENSMGAG00000005858	-1.41495	0.00257	CREM	cAMP responsive element modulator	6	protein_coding
Down	ENSMGAG00000013948	-1.40837	0.0309	ANGPT2	angiopoietin 2	2	protein_coding
Down	ENSMGAG00000008826	-1.4045	0.00241	CFTR	CF transmembrane conductance regulator [Source:HGNC Symbol;Acc:HGNC:1884]	1	protein_coding
Down	ENSMGAG00000013646	-1.39685	0.0009	LGALS3	galectin 3 [Source:HGNC Symbol;Acc:HGNC:6563]	5	protein_coding
Down	ENSMGAG00000012796	-1.39639	5.47e-11	LOC100549822	epididymis-specific alpha-mannosidase	4	protein_coding
Down	ENSMGAG00000022839	-1.39188	6.33e-05	MAN2B2	mannosidase alpha class 2B member 2 [Source:NCBI gene;Acc:422859] ortholog	4	protein_coding
Down	ENSMGAG00000014688	-1.39122	0.000401	AP1S2	adaptor related protein complex 1 subunit sigma 2	1	protein_coding
Down	ENSMGAG00000011733	-1.39054	0.000876	EIF1B	eukaryotic translation initiation factor 1B [Source:HGNC Symbol;Acc:HGNC:30792]	6	protein_coding
Down	ENSMGAG00000021919	-1.38919	0.000187	ENSMGAG00000021919	novel protein coding gene	4	protein_coding
Down	ENSMGAG00000015882	-1.3864	0.038	GPRC6A	G protein-coupled receptor class C group 6 member A	2	protein_coding
Down	ENSMGAG00000014617	-1.38044	0.00463	TSPAN7	tetraspanin 7	1	protein_coding
Down	ENSMGAG00000020876	-1.37974	0.0398	ENSMGAG00000020876	novel protein coding gene	Z	protein_coding
Down	ENSMGAG00000000935	-1.37901	0.0165	NEDD4L	NEDD4 like E3 ubiquitin protein ligase	Z	protein_coding
Down	ENSMGAG00000013356	-1.37719	0.00974	LOC100550580	proto-oncogene tyrosine-protein kinase ROS	2	protein_coding
Down	ENSMGAG00000017978	-1.37453	0.0389	F10	coagulation factor X	1	protein_coding
Down	ENSMGAG00000002967	-1.37066	0.0184	ZBTB16	zinc finger and BTB domain containing 16	26	protein_coding
Down	ENSMGAG00000004539	-1.36513	0.0037	BCO2	beta-carotene oxygenase 2 [Source:HGNC Symbol;Acc:HGNC:18503]	26	protein_coding
Down	ENSMGAG00000007704	-1.36381	0.048	HOMER2	homer scaffold protein 2 [Source:HGNC Symbol;Acc:HGNC:17513]	12	protein_coding
Down	ENSMGAG00000014013	-1.36344	0.0312	ATP6V1C2	ATPase H+ transporting V1 subunit C2	2	protein_coding
Down	ENSMGAG00000020713	-1.3574	0.0249	ENSMGAG00000020713	novel protein coding gene	16	protein_coding
Down	ENSMGAG00000003421	-1.35736	0.0324	PITPNM2	phosphatidylinositol transfer protein membrane associated 2 [Source:HGNC Symbol;Acc:HGNC:21044]	17	protein_coding
Down	ENSMGAG00000003899	-1.34376	0.000917	CIB2	calcium and integrin binding family member 2	12	protein_coding
Down	ENSMGAG00000016194	-1.33666	0.00494	FGF10	Fibroblast growth factor (FGF)	Z	protein_coding
Down	ENSMGAG00000000888	-1.33585	0.0155	SRSF6	serine and arginine rich splicing factor 6	22	protein_coding
Down	ENSMGAG00000018105	-1.33352	0.00102	ISYNA1	inositol-3-phosphate synthase 1 [Source:NCBI gene;Acc:107055367] ortholog	30	protein_coding
Down	ENSMGAG00000019664	-1.33135	0.00223	ENSMGAG00000019664	novel protein coding gene	ADDD02155914.1	protein_coding
Down	ENSMGAG00000015203	-1.33035	0.0124	VSTM5	V-set and transmembrane domain containing 5	1	protein_coding
Down	ENSMGAG00000002304	-1.32934	0.00753	RFWD2	COP1 E3 ubiquitin ligase	10	protein_coding
Down	ENSMGAG00000011714	-1.3277	0.00138	LOC100538829	carbonic anhydrase 3-like	3	protein_coding
Down	ENSMGAG00000022224	-1.32245	0.00529	DOCK8	dedicator of cytokinesis 8 [Source:NCBI gene;Acc:427348] ortholog	Z	protein_coding
Down	ENSMGAG00000009366	-1.32244	0.00119	CPN1	carboxypeptidase N subunit 1	8	protein_coding
Down	ENSMGAG00000006636	-1.32135	0.00119	CHRNB2	cholinergic receptor nicotinic beta 2 subunit [Source:HGNC Symbol;Acc:HGNC:1962]	KN389417.1	protein_coding
Down	ENSMGAG00000012814	-1.31572	0.00458	ASCL4	achaete-scute family bHLH transcription factor 4 [Source:HGNC Symbol;Acc:HGNC:24311]	1	protein_coding
Down	ENSMGAG00000013660	-1.31394	0.0488	PM20D2	peptidase M20 domain containing 2 [Source:HGNC Symbol;Acc:HGNC:21408]	2	protein_coding
Down	ENSMGAG00000013150	-1.30755	0.00397	ITPK1	inositol-tetrakisphosphate 1-kinase [Source:HGNC Symbol;Acc:HGNC:6177]	5	protein_coding
Down	ENSMGAG00000008460	-1.30515	0.0305	SUSD1	sushi domain containing 1 [Source:HGNC Symbol;Acc:HGNC:25413]	Z	protein_coding
Down	ENSMGAG00000012485	-1.305	0.000223	PPARGC1A	PPARG coactivator 1 alpha [Source:HGNC Symbol;Acc:HGNC:9237]	4	protein_coding
Down	ENSMGAG00000017053	-1.29836	2.69e-05	HS3ST1	heparan sulfate-glucosamine 3-sulfotransferase 1	4	protein_coding
Down	ENSMGAG00000004791	-1.29566	0.00284	MTMR10	myotubularin related protein 10	12	protein_coding
Down	ENSMGAG00000008839	-1.29549	0.0284	TUBB6	tubulin beta 6 class V	3	protein_coding
Down	ENSMGAG00000004657	-1.29155	0.00035	SRM	spermidine synthase [Source:HGNC Symbol;Acc:HGNC:11296]	23	protein_coding
Down	ENSMGAG00000022680	-1.29058	0.0104	ENSMGAG00000022680	novel protein coding gene	13	protein_coding
Down	ENSMGAG00000006392	-1.28716	0.0047	LAMP5	lysosomal associated membrane protein family member 5	2	protein_coding
Down	ENSMGAG00000002421	-1.285	0.00106	LCAT	lecithin-cholesterol acyltransferase	13	protein_coding
Down	ENSMGAG00000010105	-1.28423	0.0462	NPC1	NPC intracellular cholesterol transporter 1 [Source:HGNC Symbol;Acc:HGNC:7897]	3	protein_coding
Down	ENSMGAG00000017864	-1.28346	0.00452	ENSMGAG00000017864	novel protein coding gene	22	protein_coding
Down	ENSMGAG00000012063	-1.28158	0.0159	LOC100545676	neural-cadherin-like	3	protein_coding
Down	ENSMGAG00000011014	-1.27349	0.00703	CP	ceruloplasmin [Source:HGNC Symbol;Acc:HGNC:2295]	11	protein_coding
Down	ENSMGAG00000014991	-1.27291	0.0059	SLC25A30	solute carrier family 25 member 30	1	protein_coding
Down	ENSMGAG00000000721	-1.27244	0.0434	TMPRSS9	transmembrane serine protease 9	30	protein_coding
Down	ENSMGAG00000018204	-1.27019	0.0257	LOC104909859	absent in melanoma 1 protein-like	2	protein_coding
Down	ENSMGAG00000005737	-1.26842	0.00039	FICD	FIC domain protein adenylyltransferase [Source:HGNC Symbol;Acc:HGNC:18416]	17	protein_coding
Down	ENSMGAG00000010893	-1.26727	0.0449	VEGFA	vascular endothelial growth factor A [Source:HGNC Symbol;Acc:HGNC:12680]	2	protein_coding
Down	ENSMGAG00000014938	-1.26311	0.000599	CLN5	ceroid-lipofuscinosis, neuronal 5	1	protein_coding
Down	ENSMGAG00000012694	-1.26194	0.0191	KIF5C	kinesin family member 5C	7	protein_coding
Down	ENSMGAG00000006504	-1.26058	0.00639	WWC2	WW and C2 domain containing 2	4	protein_coding
Down	ENSMGAG00000009947	-1.25831	0.0261	NOS1	nitric oxide synthase 1	17	protein_coding
Down	ENSMGAG00000008900	-1.25568	0.00875	FAM234A	family with sequence similarity 234 member A	16	protein_coding
Down	ENSMGAG00000017886	-1.25543	0.00125	ENSMGAG00000017886	novel protein coding gene	ADDD02069882.1	protein_coding
Down	ENSMGAG00000021899	-1.25352	0.00811	Spint4	serine peptidase inhibitor, Kunitz type 4	22	protein_coding
Down	ENSMGAG00000009862	-1.24897	0.0199	LOC100544134	thrombospondin type-1 domain-containing protein 7A	6	protein_coding
Down	ENSMGAG00000004506	-1.24642	0.0474	COL13A1	collagen type XIII alpha 1 chain [Source:HGNC Symbol;Acc:HGNC:2190]	8	protein_coding
Down	ENSMGAG00000019468	-1.24361	0.000209	KANK1	KN motif and ankyrin repeat domains 1 [Source:NCBI gene;Acc:395475] ortholog	Z	protein_coding
Down	ENSMGAG00000000933	-1.23927	0.0129	SERPIND1	serpin family D member 1 [Source:HGNC Symbol;Acc:HGNC:4838]	17	protein_coding
Down	ENSMGAG00000002168	-1.2344	0.00084	GPR146	G protein-coupled receptor 146	16	protein_coding
Down	ENSMGAG00000008903	-1.23274	0.0397	CDO1	Cysteine dioxygenase (EC 1.13.11.20)	Z	protein_coding
Down	ENSMGAG00000021853	-1.23178	0.0273	ENSMGAG00000021853	novel protein coding gene	23	protein_coding
Down	ENSMGAG00000018601	-1.23063	0.0187	ENSMGAG00000018601	novel protein coding gene	1	protein_coding
Down	ENSMGAG00000021084	-1.22185	0.0278	LOC100546141	protein phosphatase 1K, mitochondrial [ Meleagris gallopavo (turkey) ]	4	protein_coding
Down	ENSMGAG00000020031	-1.2157	0.00359	ENSMGAG00000020031	novel protein coding gene	2	protein_coding
Down	ENSMGAG00000006608	-1.21562	0.0495	GLDN	gliomedin [Source:HGNC Symbol;Acc:HGNC:29514]	12	protein_coding
Down	ENSMGAG00000012565	-1.21477	0.000837	STXBP5	syntaxin binding protein 5 [Source:HGNC Symbol;Acc:HGNC:19665]	2	protein_coding
Down	ENSMGAG00000020650	-1.21276	0.0232	FGF10	fibroblast growth factor 10 [Source:NCBI gene;Acc:395432] ortholog	Z	protein_coding
Down	ENSMGAG00000015697	-1.2118	0.0201	BTG1	BTG anti-proliferation factor 1 [Source:HGNC Symbol;Acc:HGNC:1130]	1	protein_coding
Down	ENSMGAG00000003112	-1.21011	0.0477	LOC100544098	sulfate transporter	15	protein_coding
Down	ENSMGAG00000005911	-1.20941	0.03	DKK2	dickkopf WNT signaling pathway inhibitor 2	4	protein_coding
[truncated: 496 more rows]

## Sheet: Sham_Peak_Sham_Late
Regulation	Ensembl ID	log2 Fold Change	Adj.Pval	Gene ID	Gene description	Chr	Type
Up	ENSMGAG00000014223	6.05046	0.00456	LOC100545362	uncharacterized LOC100545362	2	protein_coding
Up	ENSMGAG00000002742	4.89074	0.00615	MIOX	myo-inositol oxygenase [Source:HGNC Symbol;Acc:HGNC:14522]	1	protein_coding
Up	ENSMGAG00000001770	4.77596	1.55e-07	MEGF6	multiple EGF like domains 6 [Source:HGNC Symbol;Acc:HGNC:3232]	23	protein_coding
Up	ENSMGAG00000020014	4.65939	0.0383	ENSMGAG00000020014	novel protein coding gene	ADDD02123984.1	protein_coding
Up	ENSMGAG00000007424	4.42088	0.00225	PRKG2	protein kinase, cGMP-dependent, type II	4	protein_coding
Up	ENSMGAG00000015657	4.36183	0.00238	ENSMGAG00000015657	meleagrin-like	2	protein_coding
Up	ENSMGAG00000008699	4.09888	0.028	SLC13A5	solute carrier family 13 member 5	21	protein_coding
Up	ENSMGAG00000016322	4.05199	0.015	ENSMGAG00000016322	snoRNA	20	snoRNA
Up	ENSMGAG00000011889	4.04862	0.0162	TFCP2L1	transcription factor CP2 like 1	7	protein_coding
Up	ENSMGAG00000012595	4.00623	0.0311	SSTR3	somatostatin receptor 3 [Source:HGNC Symbol;Acc:HGNC:11332]	1	protein_coding
Up	ENSMGAG00000012701	4.00325	0.0302	OTOP1	otopetrin 1 [Source:HGNC Symbol;Acc:HGNC:19656]	4	protein_coding
Up	ENSMGAG00000009866	3.97516	0.00151	KCNH1	potassium voltage-gated channel subfamily H member 1	2	protein_coding
Up	ENSMGAG00000018398	3.8907	0.0272	MTMR7	myotubularin related protein 7 [Source:NCBI gene;Acc:422731] ortholog	4	protein_coding
Up	ENSMGAG00000021063	3.86492	0.00612	ENSMGAG00000021063	lncRNA	KN388162.1	lncRNA
Up	ENSMGAG00000019834	3.84351	0.0145	ENSMGAG00000019834	lncRNA	28	lncRNA
Up	ENSMGAG00000000631	3.80952	0.04	HEP21	Hep21	18	protein_coding
Up	ENSMGAG00000022601	3.78671	0.000175	ENSMGAG00000022601	lncRNA	20	lncRNA
Up	ENSMGAG00000009252	3.74954	0.041	OTOP2	otopetrin 2	20	protein_coding
Up	ENSMGAG00000012328	3.7233	0.012	TBXT	T-box transcription factor T [Source:HGNC Symbol;Acc:HGNC:11515]	2	protein_coding
Up	ENSMGAG00000019617	3.72155	0.00896	OvoDB1	small basic protein 1	2	protein_coding
Up	ENSMGAG00000009227	3.69741	0.0147	SLC14A2	solute carrier family 14 member 2	Z	protein_coding
Up	ENSMGAG00000015071	3.67528	0.003	KL	klotho	1	protein_coding
Up	ENSMGAG00000012465	3.67	0.021	SEPSECS	Sep (O-phosphoserine) tRNA:Sec (selenocysteine) tRNA synthase [Source:HGNC Symbol;Acc:HGNC:30605]	4	protein_coding
Up	ENSMGAG00000021531	3.62004	0.0484	ENSMGAG00000021531	novel protein coding gene	28	protein_coding
Up	ENSMGAG00000017979	3.57895	0.048	ENSMGAG00000017979	novel protein coding gene	21	protein_coding
Up	ENSMGAG00000018152	3.56511	0.000121	PRLH	prolactin releasing hormone [Source:HGNC Symbol;Acc:HGNC:17945]	7	protein_coding
Up	ENSMGAG00000012440	3.55181	0.00325	SLC34A2	solute carrier family 34 member 2 [Source:HGNC Symbol;Acc:HGNC:11020]	4	protein_coding
Up	ENSMGAG00000011940	3.5171	0.000368	SLC35F3	solute carrier family 35 member F3 [Source:HGNC Symbol;Acc:HGNC:23616]	2	protein_coding
Up	ENSMGAG00000001332	3.48798	0.00658	DEPDC7	DEP domain containing 7 [Source:HGNC Symbol;Acc:HGNC:29899]	5	protein_coding
Up	ENSMGAG00000020295	3.39701	0.0115	OvoDA1	Ovodefensin A1 [Source:NCBI gene;Acc:422030] ortholog	2	protein_coding
Up	ENSMGAG00000003403	3.34064	0.00185	ENSMGAG00000003403	LAM_G_DOMAIN domain-containing protein	19	protein_coding
Up	ENSMGAG00000010848	3.31883	0.0019	SLC38A11	Solute carrier family 38 member 11	7	protein_coding
Up	ENSMGAG00000013950	3.23227	0.0254	MYOM2	myomesin 2	2	protein_coding
Up	ENSMGAG00000009344	3.21269	0.00456	ENSMGAG00000009344	spalt like transcription factor 4	22	protein_coding
Up	ENSMGAG00000002333	3.18735	0.00615	RIMBP2	RIMS binding protein 2	17	protein_coding
Up	ENSMGAG00000012415	3.17486	0.0479	CCKAR	cholecystokinin A receptor [Source:HGNC Symbol;Acc:HGNC:1570]	4	protein_coding
Up	ENSMGAG00000013927	3.16729	0.0333	GCM1	glial cells missing transcription factor 1	2	protein_coding
Up	ENSMGAG00000021768	3.12233	0.00211	LOC100539847	zinc finger MYM-type protein 3-like	Z	protein_coding
Up	ENSMGAG00000008662	3.09772	0.000415	LOC100542428	mucin-5B	5	protein_coding
Up	ENSMGAG00000005715	3.09501	0.0023	CRB1	Crumbs cell polarity complex component 1	10	protein_coding
Up	ENSMGAG00000021088	3.06647	0.0119	ENSMGAG00000021088	lncRNA	21	lncRNA
Up	ENSMGAG00000018707	3.03003	0.00318	ENSMGAG00000018707	KIAA1958 [Source:NCBI gene;Acc:431637] ortholog	Z	protein_coding
Up	ENSMGAG00000007928	3.02017	0.0173	RHBDL3	rhomboid like 3 [Source:HGNC Symbol;Acc:HGNC:16502]	20	protein_coding
Up	ENSMGAG00000018141	3.01307	0.0298	ENSMGAG00000018141	lncRNA	5	lncRNA
Up	ENSMGAG00000021079	2.99983	3.35e-09	LOC104909729	vacuolar protein 8-like	2	protein_coding
Up	ENSMGAG00000011083	2.98355	0.0134	CA8	carbonic anhydrase 8 [Source:HGNC Symbol;Acc:HGNC:1382]	3	protein_coding
Up	ENSMGAG00000022641	2.97233	4.77e-05	KLF9	Kruppel like factor 9 [Source:NCBI gene;Acc:770238] ortholog	Z	protein_coding
Up	ENSMGAG00000005630	2.95571	0.0282	KIF12	Kinesin-like protein	21	protein_coding
Up	ENSMGAG00000011412	2.91884	6.81e-05	KIF26B	kinesin family member 26B	2	protein_coding
Up	ENSMGAG00000018005	2.8706	0.0489	ENSMGAG00000018005	novel protein coding gene	25	protein_coding
Up	ENSMGAG00000011579	2.82583	0.00481	LOC100551000	myotubularin-related protein 7-like	4	protein_coding
Up	ENSMGAG00000009672	2.81331	0.00175	CHRD	chordin	11	protein_coding
Up	ENSMGAG00000005435	2.79431	0.018	GCGR	glucagon receptor	20	protein_coding
Up	ENSMGAG00000006682	2.74776	0.0179	SCNN1B	sodium channel epithelial 1 subunit beta	16	protein_coding
Up	ENSMGAG00000015113	2.74726	0.000103	AMER2	APC membrane recruitment protein 2	1	protein_coding
Up	ENSMGAG00000021337	2.72164	0.0408	ENSMGAG00000021337	novel protein coding gene	22	protein_coding
Up	ENSMGAG00000019068	2.71342	0.00381	ENSMGAG00000019068	novel protein coding gene	ADDD02167652.1	protein_coding
Up	ENSMGAG00000017173	2.68371	0.0122	ENSMGAG00000017173	Uncharacterized protein	29	protein_coding
Up	ENSMGAG00000016705	2.61765	0.0059	SLC9A2	solute carrier family 9 member A2 [Source:HGNC Symbol;Acc:HGNC:11072]	1	protein_coding
Up	ENSMGAG00000021665	2.61447	0.0023	ENSMGAG00000021665	lncRNA	2	lncRNA
Up	ENSMGAG00000013129	2.59744	0.00762	ATP6V0A4	ATPase H+ transporting V0 subunit a4	1	protein_coding
Up	ENSMGAG00000009947	2.54168	1.7e-05	NOS1	nitric oxide synthase 1	17	protein_coding
Up	ENSMGAG00000015635	2.52854	0.00326	CHST4	carbohydrate sulfotransferase 4	13	protein_coding
Up	ENSMGAG00000006716	2.49842	0.0329	SCNN1G	sodium channel epithelial 1 subunit gamma [Source:HGNC Symbol;Acc:HGNC:10602]	16	protein_coding
Up	ENSMGAG00000018077	2.48682	0.046	LHFPL3	LHFPL tetraspan subfamily member 3 [Source:HGNC Symbol;Acc:HGNC:6589]	1	protein_coding
Up	ENSMGAG00000006006	2.47415	0.000113	ENGASE	Mannosyl-glycoprotein endo-beta-N-acetylglucosaminidase (EC 3.2.1.96)	20	protein_coding
Up	ENSMGAG00000021577	2.46608	0.0467	ENSMGAG00000021577	lncRNA	9	lncRNA
Up	ENSMGAG00000009979	2.45718	0.000176	LOC100544288	von Willebrand factor D and EGF domain-containing protein-like	6	protein_coding
Up	ENSMGAG00000001124	2.44439	0.029	RET	ret proto-oncogene [Source:HGNC Symbol;Acc:HGNC:9967]	8	protein_coding
Up	ENSMGAG00000007819	2.4231	0.0118	TRPM5	transient receptor potential cation channel subfamily M member 5	5	protein_coding
Up	ENSMGAG00000018157	2.36786	0.029	TCF24	transcription factor 24 [Source:HGNC Symbol;Acc:HGNC:32275]	3	protein_coding
Up	ENSMGAG00000017738	2.35992	5.54e-05	ENSMGAG00000017738	novel protein coding gene	7	protein_coding
Up	ENSMGAG00000015527	2.35466	0.00833	BHLHA15	basic helix-loop-helix family member a15	16	protein_coding
Up	ENSMGAG00000006997	2.35138	0.0148	APOD	apolipoprotein D	11	protein_coding
Up	ENSMGAG00000022553	2.31935	0.000155	ENSMGAG00000022553	homeodomain protein [Source:NCBI gene;Acc:395769] ortholog	7	protein_coding
Up	ENSMGAG00000002370	2.31806	0.00997	SPOCK3	SPARC (osteonectin), cwcv and kazal like domains proteoglycan 3 [Source:HGNC Symbol;Acc:HGNC:13565]	4	protein_coding
Up	ENSMGAG00000012984	2.30448	0.048	ARC	activity regulated cytoskeleton associated protein	3	protein_coding
Up	ENSMGAG00000008458	2.28552	0.00582	TCF7	transcription factor 7 (T-cell specific, HMG-box)	15	protein_coding
Up	ENSMGAG00000009373	2.285	0.0106	LOC100547060	ribonuclease CL2	4	protein_coding
Up	ENSMGAG00000006265	2.25625	0.00095	SLC5A11	solute carrier family 5 member 11	16	protein_coding
Up	ENSMGAG00000022807	2.2482	0.0336	EDIL3	EGF like repeats and discoidin domains 3 [Source:HGNC Symbol;Acc:HGNC:3173]	Z	protein_coding
Up	ENSMGAG00000022556	2.23094	0.0023	ENSMGAG00000022556	collagen type XXVII alpha 1 chain [Source:NCBI gene;Acc:417231] ortholog	19	protein_coding
Up	ENSMGAG00000009627	2.21538	0.00374	LOXL4	lysyl oxidase like 4 [Source:HGNC Symbol;Acc:HGNC:17171]	8	protein_coding
Up	ENSMGAG00000012983	2.18271	0.000133	GALC	galactosylceramidase [Source:HGNC Symbol;Acc:HGNC:4115]	5	protein_coding
Up	ENSMGAG00000005251	2.17123	0.0131	SERPINF2	serpin family F member 2	21	protein_coding
Up	ENSMGAG00000005453	2.1555	0.000523	GALNT14	Polypeptide N-acetylgalactosaminyltransferase (EC 2.4.1.-) (Protein-UDP acetylgalactosaminyltransferase)	2	protein_coding
Up	ENSMGAG00000018746	2.1549	0.00266	LOC104911466	1-aminocyclopropane-1-carboxylate synthase-like protein 1	6	protein_coding
Up	ENSMGAG00000012432	2.14477	0.0172	ACMSD	aminocarboxymuconate semialdehyde decarboxylase [Source:HGNC Symbol;Acc:HGNC:19288]	7	protein_coding
Up	ENSMGAG00000016899	2.1446	0.0072	CLCN2	chloride voltage-gated channel 2 [Source:HGNC Symbol;Acc:HGNC:2020]	11	protein_coding
Up	ENSMGAG00000003112	2.1262	0.000976	LOC100544098	sulfate transporter	15	protein_coding
Up	ENSMGAG00000016019	2.12076	0.0329	KCNA6	potassium voltage-gated channel subfamily A member 6	1	protein_coding
Up	ENSMGAG00000008797	2.12036	0.000343	FAM64A	PICALM interacting mitotic regulator	21	protein_coding
Up	ENSMGAG00000021975	2.10674	7.26e-05	LOC100539092	prostatic acid phosphatase-like [ Meleagris gallopavo (turkey) ]	6	protein_coding
Up	ENSMGAG00000018258	2.09683	0.00838	ADGRL3	adhesion G protein-coupled receptor L3 [Source:NCBI gene;Acc:422616] ortholog	4	protein_coding
Up	ENSMGAG00000012847	2.08559	0.00308	SH3TC1	SH3 domain and tetratricopeptide repeats 1	4	protein_coding
Up	ENSMGAG00000015042	2.06138	5.07e-05	LOC100540211	phosphatidylinositol 3,4,5-trisphosphate 3-phosphatase TPTE2-like	1	protein_coding
Up	ENSMGAG00000017236	2.04403	0.0312	ENSMGAG00000017236	Uncharacterized protein	5	protein_coding
Up	ENSMGAG00000020152	2.01446	0.0146	IL31RA	interleukin 31 receptor A [Source:NCBI gene;Acc:427140] ortholog	Z	protein_coding
Up	ENSMGAG00000011492	2.01064	0.0023	LOC100550389	general transcription factor IIE subunit 1-like	4	protein_coding
Up	ENSMGAG00000019736	2.00499	0.00877	STARD8	StAR related lipid transfer domain containing 8 [Source:HGNC Symbol;Acc:HGNC:19161] ortholog	9	protein_coding
Up	ENSMGAG00000002880	1.98454	0.0296	CCR7	C-C motif chemokine receptor 7	29	protein_coding
Up	ENSMGAG00000003103	1.97519	0.0334	AGXT2	alanine--glyoxylate aminotransferase 2 [Source:HGNC Symbol;Acc:HGNC:14412]	Z	protein_coding
Up	ENSMGAG00000020237	1.97129	0.000179	ENSMGAG00000020237	novel protein coding gene	23	protein_coding
Up	ENSMGAG00000007980	1.95805	0.000553	RNF128	ring finger protein 128, E3 ubiquitin protein ligase	9	protein_coding
Up	ENSMGAG00000011471	1.94437	6.81e-05	LOC100539248	prostatic acid phosphatase-like	6	protein_coding
Up	ENSMGAG00000006392	1.94328	6.81e-05	LAMP5	lysosomal associated membrane protein family member 5	2	protein_coding
Up	ENSMGAG00000022755	1.92296	0.00221	FEV	FEV, ETS transcription factor [Source:NCBI gene;Acc:100857480] ortholog	7	protein_coding
Up	ENSMGAG00000003135	1.91489	0.0223	RAB17	RAB17, member RAS oncogene family [Source:HGNC Symbol;Acc:HGNC:16523]	7	protein_coding
Up	ENSMGAG00000002633	1.91283	0.00326	ABCG4	ATP binding cassette subfamily G member 4 [Source:HGNC Symbol;Acc:HGNC:13884]	26	protein_coding
Up	ENSMGAG00000011432	1.90794	0.0199	PCSK9	proprotein convertase subtilisin/kexin type 9 [Source:HGNC Symbol;Acc:HGNC:20001]	10	protein_coding
Up	ENSMGAG00000022182	1.89754	0.0412	ENSMGAG00000022182	pseudogene	30	pseudogene
Up	ENSMGAG00000020155	1.88171	0.00992	ZDHHC2	zinc finger DHHC-type palmitoyltransferase 2	4	protein_coding
Up	ENSMGAG00000002605	1.87671	0.00444	RNF144B	ring finger protein 144B [Source:HGNC Symbol;Acc:HGNC:21578]	3	protein_coding
Up	ENSMGAG00000011727	1.85657	0.00256	DPF3	double PHD fingers 3 [Source:HGNC Symbol;Acc:HGNC:17427]	5	protein_coding
Up	ENSMGAG00000012580	1.85443	0.00938	HAS2	hyaluronan synthase 2 [Source:HGNC Symbol;Acc:HGNC:4819]	3	protein_coding
Up	ENSMGAG00000000935	1.84934	0.00239	NEDD4L	NEDD4 like E3 ubiquitin protein ligase	Z	protein_coding
Up	ENSMGAG00000019473	1.8459	0.000954	ENSMGAG00000019473	novel protein coding gene	12	protein_coding
Up	ENSMGAG00000005875	1.84094	0.000386	COL9A3	collagen type IX alpha 3 chain	22	protein_coding
Up	ENSMGAG00000001145	1.83855	0.00131	STARD8	StAR related lipid transfer domain containing 8	9	protein_coding
Up	ENSMGAG00000003620	1.81676	0.00279	SLC20A1	solute carrier family 20 member 1 [Source:HGNC Symbol;Acc:HGNC:10946]	24	protein_coding
Up	ENSMGAG00000004342	1.81393	0.0151	ENSMGAG00000004342	pseudogene	14	pseudogene
Up	ENSMGAG00000013146	1.8086	0.0119	SVOPL	SVOP like	1	protein_coding
Up	ENSMGAG00000015000	1.80103	0.00767	RUBCNL	rubicon like autophagy enhancer	1	protein_coding
Up	ENSMGAG00000016578	1.79722	0.0042	NT5DC4	5'-nucleotidase domain containing 4	24	protein_coding
Up	ENSMGAG00000019664	1.78869	0.000343	ENSMGAG00000019664	novel protein coding gene	ADDD02155914.1	protein_coding
Up	ENSMGAG00000004661	1.77386	0.00997	ENSMGAG00000004661	Calcium-transporting ATPase (EC 7.2.2.10)	14	protein_coding
Up	ENSMGAG00000015091	1.77367	0.0085	LOC104917578	microtubule-associated tumor suppressor candidate 2-like	1	protein_coding
Up	ENSMGAG00000004221	1.76889	0.00385	LOC100538944	dynamin-3-like	10	protein_coding
Up	ENSMGAG00000014301	1.7467	0.00194	SLC22A15	solute carrier family 22 member 15 [Source:HGNC Symbol;Acc:HGNC:20301]	1	protein_coding
Up	ENSMGAG00000021815	1.74016	0.0485	ENSMGAG00000021815	novel protein coding gene	10	protein_coding
Up	ENSMGAG00000022064	1.73461	0.013	ENSMGAG00000022064	lncRNA	Z	lncRNA
Up	ENSMGAG00000002455	1.7324	0.0361	ABI3	ABI family member 3	29	protein_coding
Up	ENSMGAG00000017826	1.73215	0.0473	ENSMGAG00000017826	novel protein coding gene	KN389465.1	protein_coding
Up	ENSMGAG00000018664	1.7321	0.0451	ENSMGAG00000018664	lncRNA	9	lncRNA
Up	ENSMGAG00000021179	1.72451	0.0264	ENSMGAG00000021179	novel protein coding gene	1	protein_coding
Up	ENSMGAG00000007657	1.71889	0.000944	XYLT1	xylosyltransferase 1	16	protein_coding
Up	ENSMGAG00000002118	1.715	0.0255	ENSMGAG00000002118	Uncharacterized protein	7	protein_coding
Up	ENSMGAG00000012194	1.71274	0.0174	UCHL1	ubiquitin C-terminal hydrolase L1 [Source:HGNC Symbol;Acc:HGNC:12513]	4	protein_coding
Up	ENSMGAG00000004516	1.71193	0.00709	GATA3	GATA binding protein 3 [Source:HGNC Symbol;Acc:HGNC:4172]	1	protein_coding
Up	ENSMGAG00000008030	1.70905	0.000197	PASD1	neuronal PAS domain-containing protein 2	9	protein_coding
Up	ENSMGAG00000009271	1.70393	0.000137	ENSMGAG00000009271	Uncharacterized protein	4	protein_coding
Up	ENSMGAG00000008126	1.68592	0.000333	HNF1B	HNF1 homeobox B	21	protein_coding
Up	ENSMGAG00000001808	1.68534	0.013	RAB33A	RAB33A, member RAS oncogene family	9	protein_coding
Up	ENSMGAG00000001885	1.67642	0.00095	UBE2R2	ubiquitin conjugating enzyme E2 R2	Z	protein_coding
Up	ENSMGAG00000004375	1.66941	0.0397	FASLG	Fas ligand	10	protein_coding
Up	ENSMGAG00000010863	1.66895	0.000175	FMNL1	Formin like 1	29	protein_coding
Up	ENSMGAG00000019535	1.66638	0.0495	ENSMGAG00000019535	novel protein coding gene	25	protein_coding
Up	ENSMGAG00000021464	1.65021	0.0166	ENSMGAG00000021464	novel protein coding gene	13	protein_coding
Up	ENSMGAG00000022398	1.63687	0.0208	ENSMGAG00000022398	novel protein coding gene	Z	protein_coding
Up	ENSMGAG00000004944	1.63511	0.00873	SYN2	synapsin II [Source:HGNC Symbol;Acc:HGNC:11495]	14	protein_coding
Up	ENSMGAG00000021809	1.63125	0.000895	ELAPOR1	KIAA1324 [Source:NCBI gene;Acc:429496] ortholog	KN387089.1	protein_coding
Up	ENSMGAG00000015044	1.61882	3.79e-05	COG6	component of oligomeric golgi complex 6 [Source:HGNC Symbol;Acc:HGNC:18621]	1	protein_coding
Up	ENSMGAG00000006630	1.61466	0.000121	ADAMTSL2	ADAMTS like 2 [Source:HGNC Symbol;Acc:HGNC:14631]	19	protein_coding
Up	ENSMGAG00000015916	1.61167	0.00554	FIGN	fidgetin, microtubule severing factor	7	protein_coding
Up	ENSMGAG00000010386	1.60287	0.00212	PRR5L	proline rich 5 like [Source:HGNC Symbol;Acc:HGNC:25878]	5	protein_coding
Up	ENSMGAG00000004330	1.5992	0.00307	PCDH19	protocadherin 19 [Source:HGNC Symbol;Acc:HGNC:14270]	9	protein_coding
Up	ENSMGAG00000010740	1.59765	0.000842	TRIL	TLR4 interactor with leucine rich repeats	6	protein_coding
Up	ENSMGAG00000020665	1.59036	0.0384	LOC100539678	serine dehydratase-like	17	protein_coding
Up	ENSMGAG00000000779	1.5764	0.000876	ENSMGAG00000000779	Uncharacterized protein	26	protein_coding
Up	ENSMGAG00000019577	1.55932	0.0275	ENSMGAG00000019577	novel protein coding gene	Z	protein_coding
Up	ENSMGAG00000007021	1.55789	0.0139	LOC100542634	probable G-protein coupled receptor 158	6	protein_coding
Up	ENSMGAG00000003739	1.55771	0.00148	ERBB4	erb-b2 receptor tyrosine kinase 4 [Source:HGNC Symbol;Acc:HGNC:3432]	7	protein_coding
Up	ENSMGAG00000000448	1.55402	0.0403	SNORD125	small nucleolar RNA, C/D box 125 [Source:HGNC Symbol;Acc:HGNC:33564]	17	snoRNA
Up	ENSMGAG00000021565	1.54466	0.0115	ENSMGAG00000021565	novel protein coding gene	ADDD02259097.1	protein_coding
Up	ENSMGAG00000009451	1.53453	0.0348	NLRC3	NLR family CARD domain containing 3	16	protein_coding
Up	ENSMGAG00000021918	1.52727	0.00201	TESK2	testis-specific kinase 2 [Source:NCBI gene;Acc:100858275] ortholog	10	protein_coding
Up	ENSMGAG00000019396	1.52039	0.0102	ENSMGAG00000019396	lncRNA	26	lncRNA
Up	ENSMGAG00000007159	1.5163	0.0141	LOC104915200	metalloprotease TIKI1-like	Z	protein_coding
Up	ENSMGAG00000018551	1.50171	0.0284	ENSMGAG00000018551	novel protein coding gene	27	protein_coding
Up	ENSMGAG00000018389	1.48594	0.0116	ENSMGAG00000018389	novel protein coding gene	KN389186.1	protein_coding
Up	ENSMGAG00000012692	1.48118	0.00297	ESR1	estrogen receptor 1 [Source:HGNC Symbol;Acc:HGNC:3467]	2	protein_coding
Up	ENSMGAG00000014499	1.47121	0.00478	ADAMTS5	ADAM metallopeptidase with thrombospondin type 1 motif 5 [Source:HGNC Symbol;Acc:HGNC:221]	1	protein_coding
Up	ENSMGAG00000019242	1.46834	0.0286	ENSMGAG00000019242	novel protein coding gene	ADDD02101526.1	protein_coding
Up	ENSMGAG00000004767	1.46833	0.000691	KDSR	3-ketodihydrosphingosine reductase [Source:HGNC Symbol;Acc:HGNC:4021]	3	protein_coding
Up	ENSMGAG00000006225	1.46724	0.0494	PLAU	plasminogen activator, urokinase	8	protein_coding
Up	ENSMGAG00000021325	1.46656	0.029	ENSMGAG00000021325	novel protein coding gene	13	protein_coding
Up	ENSMGAG00000019949	1.46528	0.0474	ENSMGAG00000019949	lncRNA	1	lncRNA
Up	ENSMGAG00000022224	1.46352	0.00456	DOCK8	dedicator of cytokinesis 8 [Source:NCBI gene;Acc:427348] ortholog	Z	protein_coding
Up	ENSMGAG00000002682	1.45992	0.00163	HINFP	histone H4 transcription factor [Source:HGNC Symbol;Acc:HGNC:17850]	26	protein_coding
Up	ENSMGAG00000020921	1.4583	0.011	SLC1A3	solute carrier family 1 member 3 [Source:HGNC Symbol;Acc:HGNC:10941]	Z	protein_coding
Up	ENSMGAG00000009346	1.44699	0.00218	NFATC2	nuclear factor of activated T cells 2 [Source:HGNC Symbol;Acc:HGNC:7776]	22	protein_coding
Up	ENSMGAG00000021919	1.44255	0.000393	ENSMGAG00000021919	novel protein coding gene	4	protein_coding
Up	ENSMGAG00000000249	1.43666	0.0104	ENSMGAG00000000249	snoRNA	1	snoRNA
Up	ENSMGAG00000019498	1.43379	8.95e-06	TP53INP2	tumor protein p53 inducible nuclear protein 2 [Source:NCBI gene;Acc:769066] ortholog	22	protein_coding
Up	ENSMGAG00000009016	1.42891	0.00241	cracr2b	calcium release activated channel regulator 2B	5	protein_coding
Up	ENSMGAG00000001154	1.42498	5.93e-05	ST14	ST14 transmembrane serine protease matriptase [Source:HGNC Symbol;Acc:HGNC:11344]	26	protein_coding
Up	ENSMGAG00000006732	1.42448	0.0123	MELTF	melanotransferrin	11	protein_coding
Up	ENSMGAG00000008568	1.40969	0.00331	SGSM2	small G protein signaling modulator 2 [Source:HGNC Symbol;Acc:HGNC:29026]	21	protein_coding
Up	ENSMGAG00000010694	1.40783	0.0326	LGR5	leucine rich repeat containing G protein-coupled receptor 5 [Source:HGNC Symbol;Acc:HGNC:4504]	1	protein_coding
Up	ENSMGAG00000018949	1.40474	0.00318	ENSMGAG00000018949	novel protein coding gene	22	protein_coding
Up	ENSMGAG00000016790	1.40015	0.0198	UGGT2	UDP-glucose:glycoprotein glucosyltransferase 2	1	protein_coding
Up	ENSMGAG00000015535	1.39943	0.0384	CHST12	carbohydrate sulfotransferase 12	16	protein_coding
Up	ENSMGAG00000019951	1.39597	0.0298	ENSMGAG00000019951	novel protein coding gene	26	protein_coding
Up	ENSMGAG00000003078	1.39256	0.000496	TF	transferrin [Source:NCBI gene (formerly Entrezgene);Acc:100125333]	11	protein_coding
Up	ENSMGAG00000009900	1.38769	0.0231	GREB1L	GREB1 like retinoic acid receptor coactivator [Source:HGNC Symbol;Acc:HGNC:31042]	3	protein_coding
Up	ENSMGAG00000021393	1.38718	0.00562	ASCL3	achaete-scute family bHLH transcription factor 3 [Source:HGNC Symbol;Acc:HGNC:740]	5	protein_coding
Up	ENSMGAG00000005601	1.38533	0.000945	RPL3L	ribosomal protein L3 like	16	protein_coding
Up	ENSMGAG00000012942	1.38312	0.00558	AGO2	argonaute 2, RISC catalytic component	3	protein_coding
Up	ENSMGAG00000019496	1.3788	4.87e-08	ENSMGAG00000019496	novel protein coding gene	ADDD02159858.1	protein_coding
Up	ENSMGAG00000014496	1.37698	0.00694	CYYR1	cysteine and tyrosine rich 1 [Source:HGNC Symbol;Acc:HGNC:16274]	1	protein_coding
Up	ENSMGAG00000009732	1.37402	0.000255	LOC100540668	sodium-coupled neutral amino acid transporter 2	1	protein_coding
Up	ENSMGAG00000013647	1.36738	0.00433	ETNK1	ethanolamine kinase 1 [Source:HGNC Symbol;Acc:HGNC:24649]	1	protein_coding
Up	ENSMGAG00000002976	1.36703	0.0163	CARD11	caspase recruitment domain family member 11 [Source:HGNC Symbol;Acc:HGNC:16393]	16	protein_coding
Up	ENSMGAG00000012869	1.36604	0.0417	SORCS2	sortilin related VPS10 domain containing receptor 2	4	protein_coding
Up	ENSMGAG00000004410	1.36334	0.00565	RHOF	ras homolog family member F, filopodia associated [Source:HGNC Symbol;Acc:HGNC:15703]	17	protein_coding
Up	ENSMGAG00000003214	1.35905	0.000398	ARHGEF37	Rho guanine nucleotide exchange factor 37 [Source:HGNC Symbol;Acc:HGNC:34430]	15	protein_coding
Up	ENSMGAG00000017882	1.34725	0.0289	LOC104909282	uncharacterized LOC104909282 [ Meleagris gallopavo (turkey) ]	11	protein_coding
Up	ENSMGAG00000007195	1.34527	0.0301	PLPPR4	phospholipid phosphatase related 4 [Source:HGNC Symbol;Acc:HGNC:23496]	10	protein_coding
Up	ENSMGAG00000005918	1.34508	0.0121	LOC100545893	ras-like protein family member 11A-like	9	protein_coding
Up	ENSMGAG00000002439	1.3358	0.0137	TMEM132D	transmembrane protein 132D	17	protein_coding
Up	ENSMGAG00000018721	1.31747	0.046	ENSMGAG00000018721	novel protein coding gene	28	protein_coding
Up	ENSMGAG00000017547	1.30944	0.0277	LOC104910786	suppressor of cytokine signaling 1-like	1	protein_coding
Up	ENSMGAG00000006413	1.29894	0.0084	CMTM4	CKLF like MARVEL transmembrane domain containing 4	13	protein_coding
Up	ENSMGAG00000002500	1.29846	9.98e-06	SPIN1	spindlin 1	Z	protein_coding
Up	ENSMGAG00000002355	1.28835	0.00175	TMEM52	Transmembrane protein 52	23	protein_coding
Up	ENSMGAG00000014003	1.28512	0.011	SCNN1A	sodium channel epithelial 1 subunit alpha	1	protein_coding
Up	ENSMGAG00000000914	1.28349	0.00417	ALPK3	Alpha kinase 3	12	protein_coding
Up	ENSMGAG00000012694	1.28228	0.0303	KIF5C	kinesin family member 5C	7	protein_coding
Up	ENSMGAG00000022203	1.27927	0.0123	ENSMGAG00000022203	novel protein coding gene	ADDD02175681.1	protein_coding
Up	ENSMGAG00000005132	1.27467	0.0252	CHRNA7	cholinergic receptor nicotinic alpha 7 subunit	12	protein_coding
Up	ENSMGAG00000011929	1.27057	0.00487	DCLK3	doublecortin like kinase 3 [Source:HGNC Symbol;Acc:HGNC:19005]	6	protein_coding
Up	ENSMGAG00000014310	1.26762	1.79e-05	SLC25A10	solute carrier family 25 member 10	20	protein_coding
Up	ENSMGAG00000009206	1.26434	4.96e-06	PPP1R3B	protein phosphatase 1 regulatory subunit 3B	4	protein_coding
Up	ENSMGAG00000015816	1.25892	0.0412	SPRY3	sprouty RTK signaling antagonist 3	9	protein_coding
Up	ENSMGAG00000012457	1.25515	4.53e-05	PI4K2B	phosphatidylinositol 4-kinase type 2 beta [Source:HGNC Symbol;Acc:HGNC:18215]	4	protein_coding
Up	ENSMGAG00000010096	1.25213	0.00792	MCRIP2	MAPK regulated corepressor interacting protein 2	16	protein_coding
Up	ENSMGAG00000004254	1.24644	1.42e-06	ITIH5	inter-alpha-trypsin inhibitor heavy chain 5 [Source:HGNC Symbol;Acc:HGNC:21449]	1	protein_coding
Up	ENSMGAG00000006636	1.24552	0.00549	CHRNB2	cholinergic receptor nicotinic beta 2 subunit [Source:HGNC Symbol;Acc:HGNC:1962]	KN389417.1	protein_coding
Up	ENSMGAG00000007193	1.24369	6.07e-05	ENSMGAG00000007193	Ferritin	5	protein_coding
Up	ENSMGAG00000016072	1.24133	0.00381	MACIR	macrophage immunometabolism regulator [Source:HGNC Symbol;Acc:HGNC:25052]	Z	protein_coding
Up	ENSMGAG00000005952	1.24007	0.0101	SPHKAP	SPHK1 interactor, AKAP domain containing	11	protein_coding
Up	ENSMGAG00000010870	1.23593	3.87e-09	GPAM	glycerol-3-phosphate acyltransferase, mitochondrial	8	protein_coding
Up	ENSMGAG00000000677	1.23395	0.00922	PKNOX2	PBX/knotted 1 homeobox 2 [Source:HGNC Symbol;Acc:HGNC:16714]	26	protein_coding
Up	ENSMGAG00000008983	1.23138	0.00194	MCOLN3	mucolipin TRP cation channel 3 [Source:HGNC Symbol;Acc:HGNC:13358]	10	protein_coding
Up	ENSMGAG00000011911	1.22722	0.000827	PLEKHH1	pleckstrin homology, MyTH4 and FERM domain containing H1 [Source:HGNC Symbol;Acc:HGNC:17733]	5	protein_coding
Up	ENSMGAG00000009088	1.22714	0.00451	LOC100548146	vitellogenin-2	10	protein_coding
Up	ENSMGAG00000001400	1.22108	2.18e-05	HEXB	Beta-N-acetylhexosaminidase (EC 3.2.1.52)	Z	protein_coding
Up	ENSMGAG00000004353	1.21895	0.0102	PCSK2	proprotein convertase subtilisin/kexin type 2 [Source:HGNC Symbol;Acc:HGNC:8744]	2	protein_coding
Up	ENSMGAG00000022004	1.21685	0.000842	ENSMGAG00000022004	pseudogene	3	pseudogene
Up	ENSMGAG00000007379	1.2132	0.00662	ABCC6	multidrug resistance-associated protein 6	16	protein_coding
Up	ENSMGAG00000009148	1.20752	0.000902	CPEB3	cytoplasmic polyadenylation element binding protein 3 [Source:HGNC Symbol;Acc:HGNC:21746]	8	protein_coding
Up	ENSMGAG00000014763	1.20545	0.00356	NIPA1	NIPA magnesium transporter 1	1	protein_coding
Up	ENSMGAG00000004336	1.19476	0.000481	SUCO	SUN domain containing ossification factor [Source:HGNC Symbol;Acc:HGNC:1240]	10	protein_coding
Up	ENSMGAG00000003418	1.19297	0.00281	ENSMGAG00000003418	Phosphoinositide phospholipase C (EC 3.1.4.11)	29	protein_coding
Up	ENSMGAG00000001314	1.19286	0.00355	LOXL2	lysyl oxidase like 2	24	protein_coding
Up	ENSMGAG00000012123	1.19228	0.0133	ITGB5	integrin subunit beta 5 [Source:HGNC Symbol;Acc:HGNC:6160]	7	protein_coding
Up	ENSMGAG00000002726	1.19186	0.0073	SLC7A11	solute carrier family 7 member 11 [Source:HGNC Symbol;Acc:HGNC:11059]	4	protein_coding
Up	ENSMGAG00000016877	1.18595	0.00389	NAT8L	N-acetyltransferase 8 like [Source:HGNC Symbol;Acc:HGNC:26742]	4	protein_coding
Up	ENSMGAG00000014856	1.18534	0.035	MCF2L	MCF.2 cell line derived transforming sequence like [Source:HGNC Symbol;Acc:HGNC:14576]	1	protein_coding
Up	ENSMGAG00000004704	1.16803	0.00478	SALL1	spalt like transcription factor 1	13	protein_coding
Up	ENSMGAG00000013648	1.16716	0.0184	DLGAP5	DLG associated protein 5 [Source:HGNC Symbol;Acc:HGNC:16864]	5	protein_coding
Up	ENSMGAG00000007781	1.16367	9.68e-05	GRIP2	glutamate receptor interacting protein 2 [Source:HGNC Symbol;Acc:HGNC:23841]	14	protein_coding
Up	ENSMGAG00000014320	1.16127	0.0481	ZBTB20	zinc finger and BTB domain containing 20 [Source:HGNC Symbol;Acc:HGNC:13503]	1	protein_coding
Up	ENSMGAG00000003822	1.16086	0.00122	AGO1	argonaute RISC component 1 [Source:HGNC Symbol;Acc:HGNC:3262]	25	protein_coding
Up	ENSMGAG00000021122	1.15444	0.00317	PTAR1	protein prenyltransferase alpha subunit repeat containing 1 [Source:HGNC Symbol;Acc:HGNC:30449]	Z	protein_coding
Up	ENSMGAG00000003134	1.15127	8.95e-06	PPARGC1B	PPARG coactivator 1 beta	15	protein_coding
Up	ENSMGAG00000011803	1.15087	0.000233	ERO1B	endoplasmic reticulum oxidoreductase 1 beta [Source:HGNC Symbol;Acc:HGNC:14355]	2	protein_coding
Up	ENSMGAG00000022269	1.15029	0.00481	ENSMGAG00000022269	novel protein coding gene	3	protein_coding
Up	ENSMGAG00000022007	1.14653	0.0263	ENSMGAG00000022007	novel protein coding gene	1	protein_coding
Up	ENSMGAG00000006598	1.14559	0.000287	SGSM1	small G protein signaling modulator 1	17	protein_coding
Up	ENSMGAG00000012521	1.14032	0.0468	BAIAP2L2	BAR/IMD domain containing adaptor protein 2 like 2 [Source:HGNC Symbol;Acc:HGNC:26203]	1	protein_coding
Up	ENSMGAG00000018373	1.13696	0.0468	ENSMGAG00000018373	novel protein coding gene	7	protein_coding
Up	ENSMGAG00000010572	1.13631	0.0481	FGF2	fibroblast growth factor 2 [Source:HGNC Symbol;Acc:HGNC:3676]	4	protein_coding
Up	ENSMGAG00000010750	1.13279	0.00084	SLC33A1	solute carrier family 33 member 1	11	protein_coding
Up	ENSMGAG00000007506	1.1325	0.00175	GINS2	GINS complex subunit 2	13	protein_coding
Up	ENSMGAG00000019838	1.12228	0.0223	ENSMGAG00000019838	novel protein coding gene	ADDD02221333.1	protein_coding
Up	ENSMGAG00000015914	1.12174	2e-05	B3GNT2	UDP-GlcNAc:betaGal beta-1,3-N-acetylglucosaminyltransferase 2 [Source:HGNC Symbol;Acc:HGNC:15629]	2	protein_coding
Up	ENSMGAG00000020877	1.12038	0.0102	ENSMGAG00000020877	lncRNA	9	lncRNA
Up	ENSMGAG00000000732	1.11596	6.91e-05	SRPRA	SRP receptor subunit alpha	26	protein_coding
Up	ENSMGAG00000013469	1.11455	0.011	LOC100547920	cat eye syndrome critical region protein 2-like	1	protein_coding
Up	ENSMGAG00000006584	1.10904	0.00924	CACFD1	calcium channel flower domain containing 1 [Source:HGNC Symbol;Acc:HGNC:1365]	19	protein_coding
Up	ENSMGAG00000015502	1.10298	0.0183	ENSMGAG00000015502	DNA-(apurinic or apyrimidinic site) endonuclease (EC 3.1.-.-)	ADDD02185897.1	protein_coding
Up	ENSMGAG00000020583	1.09845	0.0053	ENSMGAG00000020583	novel protein coding gene	KN388139.1	protein_coding
Up	ENSMGAG00000018829	1.09723	0.0311	SYNGR3	synaptogyrin 3 [Source:HGNC Symbol;Acc:HGNC:11501]	16	protein_coding
Up	ENSMGAG00000017955	1.09659	0.00956	ENSMGAG00000017955	novel protein coding gene	1	protein_coding
Up	ENSMGAG00000006882	1.09315	0.0149	PLCG2	phospholipase C gamma 2 [Source:HGNC Symbol;Acc:HGNC:9066]	13	protein_coding
Up	ENSMGAG00000016039	1.08979	0.00108	DLX6	Distal-less homeobox 6	6	protein_coding
Up	ENSMGAG00000011868	1.08924	0.00298	HEBP1	heme binding protein 1 [Source:HGNC Symbol;Acc:HGNC:17176]	1	protein_coding
Up	ENSMGAG00000004154	1.08917	0.0102	SFMBT2	Scm like with four mbt domains 2	1	protein_coding
Up	ENSMGAG00000003483	1.0878	0.00128	DAB2	DAB adaptor protein 2 [Source:HGNC Symbol;Acc:HGNC:2662]	Z	protein_coding
Up	ENSMGAG00000012500	1.08514	0.00247	SAMD12	sterile alpha motif domain containing 12 [Source:HGNC Symbol;Acc:HGNC:31750]	3	protein_coding
Up	ENSMGAG00000004347	1.08131	0.0447	FHDC1	FH2 domain containing 1 [Source:HGNC Symbol;Acc:HGNC:29363]	4	protein_coding
Up	ENSMGAG00000009988	1.07939	0.000842	LRRN1	leucine rich repeat neuronal 1 [Source:HGNC Symbol;Acc:HGNC:20980]	14	protein_coding
Up	ENSMGAG00000016475	1.07692	1.55e-07	GATA2	GATA binding protein 2 [Source:HGNC Symbol;Acc:HGNC:4171]	14	protein_coding
Up	ENSMGAG00000011756	1.07296	2e-05	LOC100544294	dedicator of cytokinesis protein 1-like	8	protein_coding
Up	ENSMGAG00000000505	1.07247	0.0239	ENSMGAG00000000505	snoRNA	11	snoRNA
Up	ENSMGAG00000001171	1.07128	0.00832	SPON1	spondin 1	5	protein_coding
Up	ENSMGAG00000008767	1.06871	0.00659	PITPNM3	PITPNM family member 3	21	protein_coding
Up	ENSMGAG00000008647	1.06344	0.00804	RAP1GAP2	RAP1 GTPase activating protein 2	21	protein_coding
Up	ENSMGAG00000002706	1.05829	0.0217	SNX8	sorting nexin 8	16	protein_coding
Up	ENSMGAG00000012451	1.05542	0.0298	NPAS3	neuronal PAS domain protein 3 [Source:HGNC Symbol;Acc:HGNC:19311]	5	protein_coding
Up	ENSMGAG00000003916	1.05394	0.0411	FAM169A	family with sequence similarity 169 member A [Source:HGNC Symbol;Acc:HGNC:29138]	Z	protein_coding
Up	ENSMGAG00000009015	1.05206	0.00154	EPN3	epsin 3 [Source:HGNC Symbol;Acc:HGNC:18235]	20	protein_coding
Up	ENSMGAG00000017102	1.05205	0.0224	ABCA7	ATP binding cassette subfamily A member 7	30	pseudogene
Up	ENSMGAG00000004815	1.04692	0.00357	SH3GLB2	SH3 domain containing GRB2 like, endophilin B2 [Source:HGNC Symbol;Acc:HGNC:10834]	19	protein_coding
Up	ENSMGAG00000009635	1.04567	0.00981	PROX1	prospero homeobox 1 [Source:HGNC Symbol;Acc:HGNC:9459]	2	protein_coding
Up	ENSMGAG00000020491	1.04138	0.0199	ENSMGAG00000020491	novel protein coding gene	28	protein_coding
Up	ENSMGAG00000001630	1.03991	0.00345	LOC100539152	fibronectin type-III domain-containing protein 3a-like	9	protein_coding
Up	ENSMGAG00000004640	1.03798	0.00424	PREX1	phosphatidylinositol-3,4,5-trisphosphate dependent Rac exchange factor 1	22	protein_coding
Up	ENSMGAG00000021741	1.03398	0.00124	OAF	out at first homolog [Source:HGNC Symbol;Acc:HGNC:28752]	26	protein_coding
Up	ENSMGAG00000009347	1.03197	0.004	SLC16A5	solute carrier family 16 member 5 [Source:HGNC Symbol;Acc:HGNC:10926]	20	protein_coding
Up	ENSMGAG00000021882	1.02924	0.0127	TCFL5	transcription factor like 5 [Source:HGNC Symbol;Acc:HGNC:11646]	22	protein_coding
Up	ENSMGAG00000011644	1.02911	0.0276	PAG1	phosphoprotein membrane anchor with glycosphingolipid microdomains 1 [Source:HGNC Symbol;Acc:HGNC:30043]	3	protein_coding
Up	ENSMGAG00000010645	1.02741	0.0264	PTPRB	protein tyrosine phosphatase receptor type B [Source:HGNC Symbol;Acc:HGNC:9665]	1	protein_coding
Up	ENSMGAG00000003587	1.02154	0.016	FAM102A	family with sequence similarity 102 member A [Source:HGNC Symbol;Acc:HGNC:31419]	19	protein_coding
Up	ENSMGAG00000020401	1.01716	0.00264	ENSMGAG00000020401	novel protein coding gene	30	protein_coding
Up	ENSMGAG00000019309	1.01646	0.000309	ENSMGAG00000019309	novel protein coding gene	KN389232.1	protein_coding
Up	ENSMGAG00000010549	1.01516	0.0489	LOC100538538	creatine kinase U-type, mitochondrial	12	protein_coding
Up	ENSMGAG00000000932	1.01276	0.0412	LOC100540409	mucosa-associated lymphoid tissue lymphoma translocation protein 1-like	30	protein_coding
Up	ENSMGAG00000013491	1.01188	3.12e-05	NPTXR	Neuronal pentraxin receptor	1	protein_coding
Up	ENSMGAG00000017601	1.00927	0.041	ENSMGAG00000017601	novel protein coding gene	11	protein_coding
Up	ENSMGAG00000012060	1.0081	0.0196	ATP10D	ATPase phospholipid transporting 10D (putative)	4	protein_coding
Up	ENSMGAG00000014349	1.00624	0.00757	ATP1B1	ATPase Na+/K+ transporting subunit beta 1 [Source:HGNC Symbol;Acc:HGNC:804]	1	protein_coding
Up	ENSMGAG00000019721	0.997204	0.000186	ENSMGAG00000019721	novel protein coding gene	1	protein_coding
Up	ENSMGAG00000007002	0.996401	0.02	LOC100540476	tau-tubulin kinase 1-like	2	protein_coding
Up	ENSMGAG00000013735	0.995878	0.00224	ARNTL2	aryl hydrocarbon receptor nuclear translocator like 2 [Source:HGNC Symbol;Acc:HGNC:18984]	1	protein_coding
Up	ENSMGAG00000005696	0.995278	0.00381	LARP1	La ribonucleoprotein domain family member 1	15	protein_coding
Up	ENSMGAG00000003658	0.994187	0.00339	ENG	endoglin [Source:HGNC Symbol;Acc:HGNC:3349]	19	protein_coding
Up	ENSMGAG00000019517	0.992451	0.00336	RNF43	ring finger protein 43 [ Meleagris gallopavo (turkey) ]	21	protein_coding
Up	ENSMGAG00000019661	0.99039	0.0044	ENSMGAG00000019661	novel protein coding gene	ADDD02078949.1	protein_coding
Up	ENSMGAG00000015060	0.981272	0.00419	SMAD9	SMAD family member 9	1	protein_coding
Up	ENSMGAG00000003555	0.979306	0.0176	SAMD11	sterile alpha motif domain containing 11	23	protein_coding
Up	ENSMGAG00000013646	0.978213	0.0427	LGALS3	galectin 3 [Source:HGNC Symbol;Acc:HGNC:6563]	5	protein_coding
Up	ENSMGAG00000020714	0.977164	0.0183	LZTS3	leucine zipper tumor suppressor family member 3 [Source:NCBI gene;Acc:426948] ortholog	4	protein_coding
Up	ENSMGAG00000013235	0.976004	0.00682	LZTS3	leucine zipper tumor suppressor family member 3	4	protein_coding
Up	ENSMGAG00000005374	0.974648	0.00831	ERMP1	endoplasmic reticulum metallopeptidase 1 [Source:HGNC Symbol;Acc:HGNC:23703]	Z	protein_coding
Up	ENSMGAG00000018105	0.971691	0.0357	ISYNA1	inositol-3-phosphate synthase 1 [Source:NCBI gene;Acc:107055367] ortholog	30	protein_coding
Up	ENSMGAG00000021743	0.970783	0.0432	ENSMGAG00000021743	pseudogene	29	pseudogene
Up	ENSMGAG00000004657	0.970706	0.0173	SRM	spermidine synthase [Source:HGNC Symbol;Acc:HGNC:11296]	23	protein_coding
Up	ENSMGAG00000010395	0.962943	0.0264	LOC100548964	dual specificity testis-specific protein kinase 2	10	protein_coding
Up	ENSMGAG00000011275	0.960306	0.00105	ENSMGAG00000011275	NTP_transferase domain-containing protein	7	protein_coding
Up	ENSMGAG00000006426	0.953417	0.0308	EPHB2	EPH receptor B2	23	protein_coding
Up	ENSMGAG00000013569	0.952011	0.00336	SIX4	SIX homeobox 4 [Source:HGNC Symbol;Acc:HGNC:10890]	5	protein_coding
Up	ENSMGAG00000004417	0.951125	0.0357	LOC100540178	dimethylaniline monooxygenase [N-oxide-forming] 5-like	10	protein_coding
Up	ENSMGAG00000015872	0.945357	0.00326	LRATD2	LRAT domain containing 2 [Source:HGNC Symbol;Acc:HGNC:24166]	3	protein_coding
Up	ENSMGAG00000014525	0.940217	0.00827	DONSON	DNA replication fork stabilization factor DONSON [Source:HGNC Symbol;Acc:HGNC:2993]	1	protein_coding
Up	ENSMGAG00000004728	0.937257	0.00629	NKD1	naked cuticle homolog 1	13	protein_coding
Up	ENSMGAG00000002002	0.936558	0.00345	FCHSD1	FCH and double SH3 domains 1	15	protein_coding
Up	ENSMGAG00000019205	0.931186	0.0397	ENSMGAG00000019205	novel protein coding gene	4	protein_coding
Up	ENSMGAG00000022521	0.930763	0.000292	ENSMGAG00000022521	novel protein coding gene	KN389605.1	protein_coding
Up	ENSMGAG00000018070	0.930372	0.009	ENSMGAG00000018070	novel protein coding gene	20	protein_coding
Up	ENSMGAG00000011649	0.925601	0.0196	LOC100550042	inaD-like protein	10	protein_coding
Up	ENSMGAG00000021898	0.925265	0.00192	MANSC4	MANSC domain containing 4	1	protein_coding
Up	ENSMGAG00000009738	0.908624	0.0019	DLX5	distal-less homeobox 5	6	protein_coding
Up	ENSMGAG00000004585	0.907021	0.00445	MLXIP	MLX interacting protein [Source:HGNC Symbol;Acc:HGNC:17055]	17	protein_coding
Up	ENSMGAG00000016407	0.906026	0.0111	ENSMGAG00000016407	Plexin_cytopl domain-containing protein	14	protein_coding
Up	ENSMGAG00000007578	0.903489	0.0239	LOC100545427	macrophage mannose receptor 1-like	6	protein_coding
Up	ENSMGAG00000002447	0.897728	0.0377	PHOSPHO1	phosphoethanolamine/phosphocholine phosphatase 1 [Source:HGNC Symbol;Acc:HGNC:16815]	29	protein_coding
Up	ENSMGAG00000015041	0.897253	0.0138	SLC25A15	solute carrier family 25 member 15 [Source:HGNC Symbol;Acc:HGNC:10985]	1	protein_coding
Up	ENSMGAG00000009032	0.896436	0.0338	PDE1A	phosphodiesterase 1A [Source:HGNC Symbol;Acc:HGNC:8774]	7	protein_coding
Up	ENSMGAG00000005028	0.894875	0.0164	ZNF366	zinc finger protein 366 [Source:HGNC Symbol;Acc:HGNC:18316]	Z	protein_coding
Up	ENSMGAG00000001869	0.892999	0.0181	GRAMD1B	GRAM domain containing 1B [Source:HGNC Symbol;Acc:HGNC:29214]	26	protein_coding
Up	ENSMGAG00000009504	0.891934	0.00768	ENTPD7	ectonucleoside triphosphate diphosphohydrolase 7	8	pseudogene
Up	ENSMGAG00000008794	0.886897	8.71e-05	RAPH1	Ras association (RalGDS/AF-6) and pleckstrin homology domains 1 [Source:HGNC Symbol;Acc:HGNC:14436]	7	protein_coding
Up	ENSMGAG00000006312	0.884231	0.000846	MVK	mevalonate kinase [Source:HGNC Symbol;Acc:HGNC:7530]	17	protein_coding
Up	ENSMGAG00000020968	0.881168	2.19e-05	ENSMGAG00000020968	novel protein coding gene	ADDD02177358.1	protein_coding
Up	ENSMGAG00000010240	0.877339	0.000175	SEMA4G	semaphorin 4G [Source:HGNC Symbol;Acc:HGNC:10735]	8	protein_coding
Up	ENSMGAG00000014188	0.87707	0.0423	CLCN1	chloride channel protein 1	1	protein_coding
Up	ENSMGAG00000014331	0.875307	0.00321	ZDHHC23	zinc finger DHHC-type palmitoyltransferase 23 [Source:HGNC Symbol;Acc:HGNC:28654]	1	protein_coding
Up	ENSMGAG00000016153	0.875244	0.0348	ENSMGAG00000016153	G_PROTEIN_RECEP_F2_4 domain-containing protein	7	protein_coding
Up	ENSMGAG00000009038	0.875092	0.00136	SSX2IP	SSX family member 2 interacting protein [Source:HGNC Symbol;Acc:HGNC:16509]	10	protein_coding
Up	ENSMGAG00000008739	0.874059	0.00641	KIAA0753	KIAA0753 ortholog	21	protein_coding
Up	ENSMGAG00000014567	0.871575	0.00786	TMPRSS2	transmembrane serine protease 2	1	protein_coding
Up	ENSMGAG00000007825	0.870218	0.0114	SLC6A6	solute carrier family 6 member 6 [Source:HGNC Symbol;Acc:HGNC:11052]	14	protein_coding
Up	ENSMGAG00000013778	0.86601	0.029	LOC100547719	unconventional myosin-VI-like	2	protein_coding
Up	ENSMGAG00000008176	0.864521	0.0183	RAB11FIP4	RAB11 family interacting protein 4 [Source:HGNC Symbol;Acc:HGNC:30267]	20	protein_coding
Up	ENSMGAG00000002006	0.86413	0.0333	FAM219A	Family with sequence similarity 219 member A	Z	protein_coding
Up	ENSMGAG00000008077	0.858151	0.00176	CD99L2	CD99 molecule like 2	9	protein_coding
Up	ENSMGAG00000015253	0.853837	0.0201	KCTD14	potassium channel tetramerization domain containing 14 [Source:HGNC Symbol;Acc:HGNC:23295]	1	protein_coding
Up	ENSMGAG00000007025	0.852519	0.00224	ATP2C2	ATPase secretory pathway Ca2+ transporting 2 [Source:HGNC Symbol;Acc:HGNC:29103]	13	protein_coding
Up	ENSMGAG00000022321	0.848658	0.00549	ENSMGAG00000022321	novel protein coding gene	ADDD02204553.1	protein_coding
Up	ENSMGAG00000002720	0.847258	0.000969	NFIC	Nuclear factor I C	KN389233.1	protein_coding
Up	ENSMGAG00000016757	0.846393	0.00159	ENSMGAG00000016757	PID domain-containing protein	19	protein_coding
Up	ENSMGAG00000012794	0.845598	0.00523	GPATCH2L	G-patch domain containing 2 like [Source:HGNC Symbol;Acc:HGNC:20210]	5	protein_coding
Up	ENSMGAG00000007985	0.844837	0.0197	TRABD	TraB domain containing [Source:HGNC Symbol;Acc:HGNC:28805]	1	protein_coding
Up	ENSMGAG00000008761	0.842894	0.00215	FAM189A2	family with sequence similarity 189 member A2 [Source:HGNC Symbol;Acc:HGNC:24820]	Z	protein_coding
Up	ENSMGAG00000002203	0.841684	0.00854	SLC7A3	solute carrier family 7 member 3	9	protein_coding
Up	ENSMGAG00000009234	0.841079	0.0199	DNAJB9	DnaJ heat shock protein family (Hsp40) member B9 [Source:HGNC Symbol;Acc:HGNC:6968]	1	protein_coding
Up	ENSMGAG00000020360	0.840626	0.0126	ENSMGAG00000020360	novel protein coding gene	Z	protein_coding
Up	ENSMGAG00000020244	0.840081	0.00118	RAB29	RAB29, member RAS oncogene family	28	protein_coding
Up	ENSMGAG00000014271	0.837244	0.0264	ENSMGAG00000014271	TNFR-Cys domain-containing protein	2	protein_coding
Up	ENSMGAG00000010505	0.836734	0.0449	PPM1L	Protein phosphatase, Mg2+/Mn2+ dependent 1L	11	protein_coding
Up	ENSMGAG00000007409	0.836181	0.00509	ARL5B	ADP ribosylation factor like GTPase 5B	6	protein_coding
Up	ENSMGAG00000014593	0.83446	0.00606	AGPAT3	1-acylglycerol-3-phosphate O-acyltransferase 3	1	protein_coding
Up	ENSMGAG00000003090	0.831931	0.000764	SLC41A1	solute carrier family 41 member 1	28	protein_coding
Up	ENSMGAG00000022389	0.829704	0.0199	LOC100550180	uncharacterized LOC100550180	3	protein_coding
Up	ENSMGAG00000021428	0.824375	0.00808	ENSMGAG00000021428	novel protein coding gene	13	protein_coding
Up	ENSMGAG00000020069	0.824014	0.0473	ENSMGAG00000020069	novel protein coding gene	ADDD02254880.1	protein_coding
Up	ENSMGAG00000014814	0.822784	0.00124	MFSD9	major facilitator superfamily domain containing 9	1	protein_coding
Up	ENSMGAG00000021508	0.819924	0.00176	ENSMGAG00000021508	pseudogene	KN387273.1	pseudogene
Up	ENSMGAG00000015182	0.815219	0.0284	LOC100545410	rho GTPase-activating protein 42	1	protein_coding
Up	ENSMGAG00000021117	0.810347	0.0148	RETSAT	retinol saturase [Source:NCBI gene;Acc:426549] ortholog	ADDD02239985.1	protein_coding
Up	ENSMGAG00000001276	0.809577	0.00807	SLC25A37	solute carrier family 25 member 37	24	protein_coding
Up	ENSMGAG00000011794	0.809346	0.00549	CACHD1	cache domain containing 1 [Source:HGNC Symbol;Acc:HGNC:29314]	10	protein_coding
Up	ENSMGAG00000003800	0.806633	0.035	EPS8L2	EPS8 like 2 [Source:HGNC Symbol;Acc:HGNC:21296]	5	protein_coding
Up	ENSMGAG00000005851	0.805981	0.00481	CBX4	Chromobox 4	20	protein_coding
Up	ENSMGAG00000022650	0.805398	0.00474	ENSMGAG00000022650	novel protein coding gene	ADDD02074670.1	protein_coding
Up	ENSMGAG00000020024	0.803018	0.0141	TUBB	tubulin beta class I [Source:NCBI gene;Acc:396254] ortholog	KN388290.1	protein_coding
Up	ENSMGAG00000005135	0.797278	0.0407	LOC100546124	COBW domain-containing protein 2-like	Z	protein_coding
Up	ENSMGAG00000021808	0.79025	0.00703	ENSMGAG00000021808	novel protein coding gene	7	protein_coding
Up	ENSMGAG00000001703	0.790172	9.37e-05	FKBP15	FKBP prolyl isomerase family member 15 [Source:HGNC Symbol;Acc:HGNC:23397]	19	protein_coding
Up	ENSMGAG00000017903	0.789958	0.000191	ENSMGAG00000017903	novel protein coding gene	KN389164.1	protein_coding
Up	ENSMGAG00000022912	0.789909	0.03	ENSMGAG00000022912	novel protein coding gene	KN389459.1	protein_coding
Up	ENSMGAG00000006804	0.782452	0.00565	SLC30A7	solute carrier family 30 member 7	10	protein_coding
Up	ENSMGAG00000018822	0.780805	0.0112	ENSMGAG00000018822	novel protein coding gene	KN388616.1	protein_coding
Up	ENSMGAG00000001855	0.780241	0.0125	ALAD	aminolevulinate dehydratase [Source:HGNC Symbol;Acc:HGNC:395]	19	protein_coding
Up	ENSMGAG00000001872	0.78014	0.00298	VRK2	VRK serine/threonine kinase 2	2	protein_coding
Up	ENSMGAG00000010138	0.77997	0.000192	CAPN15	calpain 15	16	protein_coding
Up	ENSMGAG00000016762	0.779344	0.0329	ENSMGAG00000016762	Uncharacterized protein	1	protein_coding
Up	ENSMGAG00000019938	0.777786	0.0403	ENSMGAG00000019938	novel protein coding gene	KN388510.1	protein_coding
Up	ENSMGAG00000013406	0.77774	0.00248	B4GALNT3	Beta-1,4-N-acetylgalactosaminyltransferase (EC 2.4.1.244)	1	protein_coding
Up	ENSMGAG00000021869	0.776845	7.41e-05	ENSMGAG00000021869	novel protein coding gene	ADDD02159201.1	protein_coding
Up	ENSMGAG00000009782	0.776395	0.000912	ENSMGAG00000009782	Uncharacterized protein	28	protein_coding
Up	ENSMGAG00000009228	0.774232	0.0318	MAGI1	membrane associated guanylate kinase, WW and PDZ domain containing 1 [Source:HGNC Symbol;Acc:HGNC:946]	14	protein_coding
Up	ENSMGAG00000022138	0.772671	0.00238	LOC100546474	general transcription factor IIH subunit 2	Z	protein_coding
Up	ENSMGAG00000002033	0.771627	0.0494	RC3H1	ring finger and CCCH-type domains 1 [Source:HGNC Symbol;Acc:HGNC:29434]	10	protein_coding
Up	ENSMGAG00000007091	0.766468	0.0174	LOC100543264	E3 ubiquitin-protein ligase RNF130-like	15	protein_coding
Up	ENSMGAG00000001117	0.765787	0.00517	CSGALNACT2	chondroitin sulfate N-acetylgalactosaminyltransferase 2 [Source:HGNC Symbol;Acc:HGNC:24292]	8	protein_coding
Up	ENSMGAG00000017779	0.765071	0.000983	LOC104910762	microtubule-associated tumor suppressor 1 homolog	4	protein_coding
Up	ENSMGAG00000022913	0.764046	0.0023	SURF4	surfeit 4 [Source:HGNC Symbol;Acc:HGNC:11476]	19	protein_coding
Up	ENSMGAG00000003029	0.763847	0.0059	TYK2	tyrosine kinase 2	18	protein_coding
Up	ENSMGAG00000004524	0.761829	0.000298	TBC1D13	TBC1 domain family member 13 [Source:HGNC Symbol;Acc:HGNC:25571]	19	protein_coding
Up	ENSMGAG00000021044	0.75979	0.018	ENSMGAG00000021044	novel protein coding gene	1	protein_coding
Up	ENSMGAG00000020386	0.758637	0.0119	ENSMGAG00000020386	novel protein coding gene	ADDD02274365.1	protein_coding
Up	ENSMGAG00000003918	0.757669	0.0122	FBXL18	F-box and leucine rich repeat protein 18	16	protein_coding
Up	ENSMGAG00000008870	0.757666	0.0282	NBEAL1	neurobeachin like 1 [Source:HGNC Symbol;Acc:HGNC:20681]	7	protein_coding
Up	ENSMGAG00000018945	0.756551	0.00744	ENSMGAG00000018945	novel protein coding gene	KN387905.1	protein_coding
Up	ENSMGAG00000009142	0.755237	1.51e-05	OGDH	oxoglutarate dehydrogenase	24	protein_coding
Up	ENSMGAG00000003100	0.752901	0.0224	HERPUD1	homocysteine inducible ER protein with ubiquitin like domain 1	13	protein_coding
Up	ENSMGAG00000017386	0.752741	0.0433	ENSMGAG00000017386	DH domain-containing protein	2	protein_coding
Up	ENSMGAG00000012870	0.750863	0.0305	TMEM181	transmembrane protein 181 [Source:HGNC Symbol;Acc:HGNC:20958]	2	protein_coding
Up	ENSMGAG00000003894	0.749618	0.011	TRUB2	TruB pseudouridine synthase family member 2	19	protein_coding
Up	ENSMGAG00000005686	0.74928	0.000309	HMGCL	3-hydroxymethyl-3-methylglutaryl-CoA lyase	25	protein_coding
Up	ENSMGAG00000001021	0.748636	0.028	LOC100544917	rho guanine nucleotide exchange factor 4	11	protein_coding
Up	ENSMGAG00000008867	0.748032	0.0222	SEMA6A	semaphorin 6A	Z	protein_coding
Up	ENSMGAG00000010611	0.74802	0.0197	OSBPL3	oxysterol binding protein like 3 [Source:HGNC Symbol;Acc:HGNC:16370]	6	protein_coding
Up	ENSMGAG00000017809	0.744642	0.0413	ENSMGAG00000017809	lncRNA	9	lncRNA
Up	ENSMGAG00000014709	0.742516	0.033	FRMPD4	FERM and PDZ domain containing 4 [Source:HGNC Symbol;Acc:HGNC:29007]	1	protein_coding
Up	ENSMGAG00000014532	0.740373	0.017	ITSN1	intersectin 1 [Source:HGNC Symbol;Acc:HGNC:6183]	1	protein_coding
Up	ENSMGAG00000018371	0.733949	0.0333	LOC104914876	integrin alpha-1-like	Z	protein_coding
Up	ENSMGAG00000004449	0.733197	0.0214	KLHL4	kelch like family member 4 [Source:HGNC Symbol;Acc:HGNC:6355]	9	protein_coding
Up	ENSMGAG00000007992	0.733007	7.29e-05	TBC1D8B	TBC1 domain family member 8B	9	protein_coding
Up	ENSMGAG00000001176	0.732457	0.00238	LMAN1	lectin, mannose binding 1	11	protein_coding
Up	ENSMGAG00000001736	0.732221	0.00478	TPRG1L	tumor protein p63 regulated 1 like [Source:HGNC Symbol;Acc:HGNC:27007]	23	protein_coding
Up	ENSMGAG00000012278	0.731789	0.0231	SMIM14	small integral membrane protein 14 [Source:HGNC Symbol;Acc:HGNC:27321]	4	protein_coding
Up	ENSMGAG00000018190	0.730157	0.00296	DERL3	derlin 3 [Source:NCBI gene;Acc:416934] ortholog	17	protein_coding
Up	ENSMGAG00000001120	0.72675	0.0313	FZD9	frizzled class receptor 9	21	protein_coding
Up	ENSMGAG00000005892	0.724734	0.0467	ENSMGAG00000005892	Uncharacterized protein	9	protein_coding
Up	ENSMGAG00000007019	0.722783	0.000985	FLAD1	flavin adenine dinucleotide synthetase 1	KN388132.1	protein_coding
Up	ENSMGAG00000021155	0.722233	0.0265	ENSMGAG00000021155	novel protein coding gene	1	protein_coding
Up	ENSMGAG00000003814	0.719333	0.0357	PBLD	phenazine biosynthesis like protein domain containing [Source:HGNC Symbol;Acc:HGNC:23301]	8	protein_coding
Up	ENSMGAG00000006029	0.718975	0.028	ZDHHC15	zinc finger DHHC-type palmitoyltransferase 15 [Source:HGNC Symbol;Acc:HGNC:20342]	9	protein_coding
Up	ENSMGAG00000020080	0.71772	0.0447	ID3	inhibitor of DNA binding 3, HLH protein	KN388113.1	protein_coding
Up	ENSMGAG00000004240	0.710766	0.0137	NSD1	nuclear receptor binding SET domain protein 1 [Source:HGNC Symbol;Acc:HGNC:14234]	15	protein_coding
[truncated: 751 more rows]

## Sheet: Semen_Early_Semen_Peak
Regulation	Ensembl ID	log2 Fold Change	Adj.Pval	Gene ID	Gene description	Chr	Type
[truncated: 1,295 more rows]

## Sheet: Semen_Peak_Semen_Late
Regulation	log2 Fold Change	Adj.Pval	Ensembl ID	Gene ID	Gene description	Chr	Type
[truncated: 52 more rows]
